# Supplementary material
Source: MDPI journal article supplement (https://www.mdpi.com/2073-4395/10/12/1888)
Supplement: s1 [file s1]

## Sheet: Table-S1_Mapping
Sample		FieldScore	Trait	Raw	Trim	Mapping(%)
P5260_101	L1	1	R	9.8	6	0.8192
P5260_102	L2	2	R	21.1	11.5	0.7036
P5260_103	L3	2	R	19.5	9.5	0.7173
P5260_104	L4	2	R	17.4	10.5	0.7088
P5260_105	L5	2	R	21.1	11.9	0.84
P5260_106	L6	2	R	16.7	7.4	0.6843
P5260_107	L7	2	R	18.2	11.1	0.7694
P5260_108	L8	3	R	18.3	11.1	0.8048
P5260_109	L9	3	R	16.7	10.8	0.7771
P5260_110	L10	8	S	17.8	11.6	0.7174
P5260_111	L11	7	S	16.1	9.3	0.6553
P5260_112	L12	7	S	19.5	10.3	0.4498
P5260_113	L13	7	S	30.3	17.7	0.7283
P5260_115	L15	7	S	16.6	7.8	0.4789
P5260_116	L16	6	S	20	12.1	0.7486
P5260_117	L17	6	S	18.3	6.9	0.5206
P5260_118	L18	6	S	19.6	12.3	0.58
P5260_119	L19	6	S	18.2	11.3	0.6586
P5260_120	L20	6	S	18.1	9.3	0.6246
P5260_121	L21	6	S	17.5	7.4	0.8214

## Sheet: Table-S2_Ref-denovoDEGs
Trans	L1	L2	L3	L4	L5	L6	L7	L8	L9	L10	L11	L12	L13	L15	L16	L17	L18	L19	L20	L21	CazyEnz Description	Protease Description	Uniport ids	Uniport Description	Wheat CDS ids	Wheatt CDS location
MSTRG.11228.2	0	0	0	15.425	0	0	2.02	0	11.786	0	0	0	0	0	0	0	0	0	0	0			sp|Q2MHE4|HT1_ARATH	Serine/threonine-protein kinase HT1 OS=Arabidopsis	TraesCS1D02G341600.1	cds chromosome:IWGSC:1D:431703681:431706895:1
MSTRG.12729.2	0	0.314	0.434	0	0.39	0.795	0.967	0.963	3.723	1.824	15.028	2.218	7.656	10.383	6.213	11.886	8.964	10.391	8.799	0.327	BAC79549.1|GH27|3.2.1.22		sp|Q8VXZ7|AGAL3_ARATH	Alpha-galactosidase 3 OS=Arabidopsis thaliana	TraesCS2A02G105900.1	cds chromosome:IWGSC:2A:58361824:58372963:-1
MSTRG.13052.1	0.642	1.76	1.118	1.579	0.598	0.94	0.918	0.853	1.477	1.261	1.228	1.529	11.616	9.821	1.75	11.364	10.165	1.321	1.375	1.291					TraesCS2A02G147000.4	cds chromosome:IWGSC:2A:93401998:93405346:1
MSTRG.13417.2	9.141	9.607	5.328	5.508	4.051	7.142	7.336	10.232	11.16	5.098	4.122	0.796	0.675	0.843	3.171	1.279	0	0.196	0.635	0.482			sp|Q9DE27|RUVB2_XENLA	RuvB-like 2 OS=Xenopus laevis GN=ruvbl2	TraesCS2A02G188100.1	cds chromosome:IWGSC:2A:151251472:151255407:1
MSTRG.13422.1	0	0	0	0	0	0	0	0	0	0	28.818	2.021	11.616	21.995	5.05	13.539	2.375	5.213	6.863	21.835
MSTRG.13817.1	0	0	0	0	0	0	0	0	0.134	0	3.089	3.613	2.552	3.089	2.485	2.745	4.252	2.651	3.353	2.722					TraesCS1D02G175300.1	cds chromosome:IWGSC:1D:249402666:249406664:-1
MSTRG.13901.1	0	0	0	0	0	0	0	0	0	0.542	29.091	10.176	0	0	10.05	0	0	8.811	19.119	29.938
MSTRG.14100.1	0	0	0	0.179	0	0.533	0	0	0	0	4.249	2.844	5.482	2.712	2.435	1.889	2.262	3.044	2.281	8.631
MSTRG.15281.3	0.09	0	0	0	0.146	0	0	0	0	2.398	0	1.404	2.003	1.053	0.875	1.309	0.788	0	0.812	0
MSTRG.15316.2	0	0	0	0	0	0	0	0	0	1.23	0.575	2.298	0	0.781	7.366	0	3.529	14.247	2.187	0			sp|Q8LPJ5|ICDHP_ARATH	Isocitrate dehydrogenase [NADP], chloroplastic/mitochondrial	TraesCS2A02G363500.1	cds chromosome:IWGSC:2A:607820263:607827519:1
MSTRG.15779.1	0	0	0	0	0	0	0	0	0	0	0	0	110.594	191.329	0	131.149	52.544	0	0	0
MSTRG.16203.1	3.409	1.427	3.462	1.184	2.318	0.833	1.112	3.172	0.949	1.772	10.321	17.33	5.55	20.02	17.128	1.25	6.035	9.346	7.633	8.367			sp|Q7PCC4|ANRCH_VITVI	Anthocyanidin reductase ((2S)-flavan-3-ol-forming)	TraesCS2B02G508000.1	cds chromosome:IWGSC:2B:704412130:704414285:1
MSTRG.16853.1	7.631	22.725	15.909	8.516	2.184	3.188	2.252	9.755	6.014	1.856	0	0	0.721	0	1.084	2.273	0	0	0	0
MSTRG.17630.1	2.676	2.464	4.536	5.32	2.208	3.363	2.436	2.714	3.92	11.27	10.915	13.181	45.753	14.157	7.197	10.331	3.285	9.828	6.79	10.84			sp|O49621|MLO1_ARATH	MLO-like protein 1 OS=Arabidopsis thaliana	TraesCS2B02G097800.1	cds chromosome:IWGSC:2B:57679415:57682721:-1
MSTRG.1960.2	11.781	10.863	13.175	23.669	8.516	6.241	22.472	31.227	8.341	11.718	237.629	162.745	135.118	17.308	270.676	67.095	23.156	181.078	54.713	1.353	ABT33397.1|GH19		sp|Q7XCK6|CHI8_ORYSJ	Chitinase 8 OS=Oryza sativa subsp. japonica	TraesCS1A02G203700.1	cds chromosome:IWGSC:1A:365507410:365508980:1
MSTRG.21855.1	0.136	0	0	0	0	0	0	0	0.063	0.094	1.608	1.788	0	0	2.704	0.148	0.291	4.213	2.718	0.14
MSTRG.21997.1	14.349	5.317	4.504	0	2.172	8.673	7.355	10.543	0	0	0	0	0	0	0	0	0	0	0	0
MSTRG.22051.2	2.278	30.182	20.619	0	11.091	32.706	12.517	7.27	0	0.167	0	0	0	0	0	0	1.37	0.509	0	0					TraesCS2B02G616300.1	cds chromosome:IWGSC:2B:793582054:793585867:-1
MSTRG.22114.10	1.139	9.988	0	0.902	0	2.781	1.991	2.815	0.832	0	0	0	0	0	0	0	0	0	0	0					TraesCS2A02G562500.1	cds chromosome:IWGSC:2A:763684752:763695847:1
MSTRG.23173.5	0	0.048	0	0	0	0	0	0	0	0	5.818	1.905	0.446	6.276	0	0	1.915	2.705	6.227	2.815
MSTRG.2527.1	4.955	0.913	3.017	0.291	1.928	0.649	3.228	1.146	1.853	0.573	79.291	116.908	1.133	0.825	140.095	1.22	3.82	109.057	123.401	1.337					TraesCS1A02G270900.1	cds chromosome:IWGSC:1A:464901178:464908479:1
MSTRG.2563.4	2.939	0	0	2.754	2.282	6.609	1.546	5.171	0.662	15.941	7.446	11.678	6.729	3.01	11.77	14.267	13.77	2.758	18.776	9.222			sp|Q0JHF8|F16P2_ORYSJ	Fructose-1,6-bisphosphatase, cytosolic	TraesCS1A02G273900.1	cds chromosome:IWGSC:1A:467257745:467260124:-1
MSTRG.26773.1	0	0	0	0	0	0	0	0	0.179	0.177	1.608	12.367	0	0	16.7	0	25.803	20.737	10.08	0			sp|Q39214|RPM1_ARATH	Disease resistance protein RPM1 OS=Arabidopsis	TraesCS2B02G625500.1	cds chromosome:IWGSC:2B:798190465:798195588:-1
MSTRG.27834.1	0.353	3.006	0	1.598	1.269	0	1.382	1.999	1.826	2.064	97.973	62.415	0.172	0	33.689	0	0.169	47.115	83.09	1.493					TraesCS3A02G122700.1	cds chromosome:IWGSC:3A:98507031:98507555:-1
MSTRG.29098.1	1.383	0.029	0.412	1.777	8.48	0.659	1.73	1.577	1.396	1.314	12.611	17.24	6.832	16.72	10.656	19.147	13.732	10.971	20.431	0.855			sp|Q7Y1I7|DNM1A_ORYSJ	DNA (cytosine-5)-methyltransferase 1A OS=Oryza	TraesCS7A02G531500.1	cds chromosome:IWGSC:7A:709965582:709975490:-1
MSTRG.30572.5	0	0	0	0	0	0	4.736	4.41	5.593	0	0	0	0	0	0	0	0	0	0	0					TraesCS3A02G397500.3	cds chromosome:IWGSC:3A:644803705:644811235:-1
MSTRG.31662.1	0	0.361	0	0.113	0	0	0	0	0.197	0	88.647	73.173	0.217	0	72.09	0	0	61.228	94.972	0
MSTRG.31665.2	0	0	0	0	0	0	0	0	0	0	153.728	186.191	0	0	278.976	0	0	202.734	178.531	0					TraesCS3B02G014800.1	cds chromosome:IWGSC:3B:6234140:6241848:1
MSTRG.31665.3	0	0	0	0.113	0	0	0	0	0	0	61.807	61.986	0	0	12.297	0	0	12.078	25.034	0					TraesCS3B02G014800.1	cds chromosome:IWGSC:3B:6234140:6241848:1
MSTRG.32746.1	5.741	4.471	2.854	2.359	4.429	2.617	0.561	1.045	2.765	0.865	0.351	0	0.572	1.097	1.879	0.61	0.375	0	0.833	0.544			sp|A3B0Y1|MT3B_ORYSJ	Metallothionein-like protein 3B OS=Oryza	TraesCS3B02G158700.1	cds chromosome:IWGSC:3B:154006102:154006611:-1
MSTRG.36814.1	0	0	2.496	0	0	0	2.31	1.064	2.121	0	180.578	65.223	4.177	1.966	170.245	3.031	0	129.276	113.154	5.925					TraesCS5B02G173900.1	cds chromosome:IWGSC:5B:319322509:319324548:-1
MSTRG.38454.3	0	1.722	0.89	1.824	0.183	0.727	0.184	0.229	1.199	0.521	18.955	14.325	1.659	1.001	11.581	1.063	3.98	10.203	24.972	0					TraesCS3D02G202900.1	cds chromosome:IWGSC:3D:250333083:250336356:-1
MSTRG.39875.1	0.19	0.39	0.912	0.432	0.561	0.659	0.338	0.138	0.465	0.897	5.467	7.216	0.629	0.843	6.7	1.83	0.347	6.142	5.519	0.264
MSTRG.40288.1	0	0	0	0.592	0	0	0	0	0	1.71	2.972	2.334	1.82	3.081	2.535	1.25	1.858	1.562	2.083	1.369					TraesCS3B02G431600.1	cds chromosome:IWGSC:3B:670532751:670536247:-1
MSTRG.40658.1	6.781	11.386	0	0.329	0	0.165	0.213	3.236	6.667	0.219	0	0	0	0	0.099	0	0.422	0	0	0.202					TraesCS4A02G052900.1	cds chromosome:IWGSC:4A:44653806:44656320:1
MSTRG.41754.3	0	0	0	0	0	0	0	3.438	0	0	0	0	1.259	5.17	0	0	3.201	0	0	0					TraesCS4A02G056800.2	cds chromosome:IWGSC:4A:47635500:47648662:1
MSTRG.44602.13	0	0	0	0	0	0	0	0	0	0.427	7.65	9.228	0	0	18.37	0	0	18.3	10.028	0			sp|Q9ASR1|EF2_ARATH	Elongation factor 2 OS=Arabidopsis thaliana	TraesCS4A02G363700.1	cds chromosome:IWGSC:4A:636677006:636682301:-1
MSTRG.45352.1	0	0.656	0	0	0	0	0	0	0	0	295.889	134.694	0	0	150.572	0	0	99.774	126.911	0
MSTRG.45353.1	1.148	0	0	0.968	0	0	0	0.862	0	0.98	9.931	41.437	0.584	0	78.79	0	0	63.165	37.958	0					TraesCS1A02G235700.1	cds chromosome:IWGSC:1A:417387137:417390440:-1
MSTRG.45356.1	2.477	1.275	3.462	1.401	1.135	2.113	1.798	1.054	1.62	1.616	2.242	15.514	1.339	1.782	36.373	11.906	0.901	30.217	11.726	7.869					TraesCS7D02G008300.2	cds chromosome:IWGSC:7D:4012209:4017650:-1
MSTRG.45405.1	0	0	0	0	0	0	0	0	0	0	66.992	46.087	0	0	74.913	0	0	44.607	30.793	0
MSTRG.45412.2	2.034	0	0	0	0	1.793	0	0.871	0	0	41.663	40.257	1.545	1.597	16.999	2.263	1.558	27.691	21.962	1.866			sp|P93422|SYHC_ORYSJ	Histidine--tRNA ligase, cytoplasmic OS=Oryza	TraesCS4A02G486400.1	cds chromosome:IWGSC:4A:739595683:739600745:1
MSTRG.46862.2	0.009	0	0	0	0	0	0	0	0	0	0	175.863	0	0	0	23.605	158.675	0	0	0			sp|Q8LRM8|TCTP_WHEAT	Translationally-controlled tumor protein	TraesCS4B02G144200.1	cds chromosome:IWGSC:4B:193523940:193525880:1
MSTRG.47371.7	0	0	0	0	0	0	0	0	0	0.521	0	8.611	2.003	4.52	0	0	0	1.518	4.426	5.568
MSTRG.50259.2	0	0	9.485	0	0	0	0	0	0	0	13.927	0	0	2.861	0	0	0	0	0	12.519			sp|Q9AYT7|MTNA_HORVU	Methylthioribose-1-phosphate isomerase OS=Hordeum	TraesCS4A02G204000.2	cds chromosome:IWGSC:4A:495078320:495086905:1
MSTRG.52828.1	84.693	104.216	173.95	199.991	183.537	304.58	235.308	268.096	101.335	591.087	458.856	414.938	3044.71	191.847	758.248	1689.78	450.371	482.988	128.723	177.216			sp|P13867|IAAT_MAIZE	Alpha-amylase/trypsin inhibitor OS=Zea mays	TraesCS5A02G018000.1	cds chromosome:IWGSC:5A:14227124:14228178:-1
MSTRG.53864.14	0	0	0	0	0	0	0	0	0	1.731	0	10.283	3.937	0	0	0.148	0.948	2.482	2.312	3.484			sp|P51281|YCF45_PORPU	Uncharacterized protein ycf45 OS=Porphyra	TraesCS5A02G120900.2	cds chromosome:IWGSC:5A:259061757:259082651:-1
MSTRG.55541.1	0	793.006	0	0	0	0	0	1427.83	0	0	0	0	0.481	1776.11	0	1.535	0.479	0.393	0	253.374
MSTRG.62092.2	0.289	0	0	0.235	0.22	0	0	0	0	4.744	1.657	6.715	1.064	1.755	0.477	0	0.3	0.741	1.323	0					TraesCS5B02G538000.1	cds chromosome:IWGSC:5B:693685952:693688809:1
MSTRG.64873.3	1.718	1.16	1.867	0.893	4.258	3.295	0	0.688	3.07	0	0	0	0	0	0.159	0	0	0	0.469	0					TraesCS1D02G420800.1	cds chromosome:IWGSC:1D:477182520:477186507:1
MSTRG.68021.1	0.398	0	0	0	0.305	0	0	0	0	0.386	1.52	1.985	1.236	2.984	0.736	0	0.817	1.598	1.354	0					TraesCS6B02G175500.1	cds chromosome:IWGSC:6B:191531788:191532502:1
MSTRG.6838.1	0	0.609	2.084	0.348	0.659	0.504	0.329	1.238	0.295	6.13	0.409	6.116	2.666	3.836	1.571	3.572	3.52	4.035	7.8	0			sp|O26373|Y273_METTH	UPF0098 protein MTH_273 OS=Methanothermobacter	TraesCS1B02G304800.1	cds chromosome:IWGSC:1B:527370862:527371626:-1
MSTRG.69595.4	0.262	0	0	0	0	0.727	0	0	0	0	61.339	27.416	0	0.746	17.038	0	0	10.569	27.294	0			sp|Q9SXB8|Y1133_ARATH	G-type lectin S-receptor-like serine/threonine-protein	TraesCS6A02G294700.1	cds chromosome:IWGSC:6A:528919763:528923228:1
MSTRG.70367.4	0	0	0	0	0	0	0	0	0	0	137.005	92.112	0	0	73.83	0	0	58.711	51.297	0					TraesCS2B02G362500.1	cds chromosome:IWGSC:2B:516284613:516289776:1
MSTRG.72115.1	0.289	0	0.271	0.216	0	0	0	0	0.188	0.209	34.237	23.392	0	0	15.915	0.462	0.282	16.988	33.147	0
MSTRG.72820.1	0	3.12	1.291	0.996	0.366	1.231	0.986	0.394	1.387	2.659	36.176	24.439	0.401	3.634	12.903	2.263	1.934	10.721	21.941	0.918					TraesCS1A02G154200.1	cds chromosome:IWGSC:1A:268385375:268392359:1
MSTRG.75777.1	0.298	12.784	7.358	11.176	5.844	0.649	6.157	0.935	0.197	0.542	0	0.295	0.286	0.869	0.099	0.335	0.479	0.134	0.156	0
MSTRG.77432.17	0	0	0	0	0	0	0	0	0	0	0	0	1.099	1.755	2.217	1.24	1.108	0.527	1.406	8.46			sp|P44644|RELA_HAEIN	GTP pyrophosphokinase OS=Haemophilus influenzae	TraesCS6D02G246800.1	cds chromosome:IWGSC:6D:349922993:349930197:-1
MSTRG.78989.1	0	0	0.163	0	0	0	0	0	0.107	0	37.238	35.178	0	0	21.462	0	0	16.889	44.331	0					TraesCS7A02G039100.1	cds chromosome:IWGSC:7A:17439793:17444552:-1
MSTRG.78989.12	0	0	0	0	0.183	0	0	0.11	0	0.469	227.718	47.983	0	0	4.334	0	0	0	27.992	0					TraesCS7A02G039100.1	cds chromosome:IWGSC:7A:17439793:17444552:-1
MSTRG.78989.2	0	0	0	0	0	0	0	0	0	0	0	20.602	0	0	24.414	0	0	20.219	25.399	0					TraesCS7A02G039100.1	cds chromosome:IWGSC:7A:17439793:17444552:-1
MSTRG.78989.3	0	0	0	0	0	0	0	0	0	0	295.187	40.034	0	0	35.299	0	0	15.702	68.115	0					TraesCS7A02G039100.1	cds chromosome:IWGSC:7A:17439793:17444552:-1
MSTRG.78989.5	0	0.266	0	0	0	0	0	0	0	0	70.393	16.686	0	0	11.273	0	0	1.205	43.612	0					TraesCS7A02G039100.1	cds chromosome:IWGSC:7A:17439793:17444552:-1
MSTRG.78989.7	0	0	0	0	0	0	0	0	0	0	29.101	0	0	0	9.513	0	0	0	30.252	0					TraesCS7A02G039100.1	cds chromosome:IWGSC:7A:17439793:17444552:-1
MSTRG.78989.9	0	0	0	0	0	0	0	0	0	0	58.425	120.583	0	0	123.096	0	0	119.609	172.064	0					TraesCS7A02G039100.1	cds chromosome:IWGSC:7A:17439793:17444552:-1
MSTRG.78990.1	0	0	0	0	0	0	0	0	0	0	3.567	25.047	0	0	41.035	0	0	47.035	27.659	0			sp|Q39214|RPM1_ARATH	Disease resistance protein RPM1 OS=Arabidopsis	TraesCS7A02G039900.1	cds chromosome:IWGSC:7A:18042154:18047529:-1
MSTRG.79188.1	0	0.257	0	0	0	0	0	0	0	0	204.416	93.14	0	0	88.701	0	0	61.8	55.64	0
MSTRG.83821.4	0	0	0	0	0	0	16.006	0	0	0	0	0	0	0	3.261	0	58.307	7.043	0	0	CAA46701.1|GT4|2.4.1.13		sp|P31922|SUS1_HORVU	Sucrose synthase 1 OS=Hordeum vulgare GN=SS1	TraesCS7B02G063400.1	cds chromosome:IWGSC:7B:68344330:68349270:-1
MSTRG.85744.6	0	0	38.059	0	0	0	14.682	0	0	0	0	0	0	0	0	0	0	0	0	0			sp|O65717|CNGC1_ARATH	Cyclic nucleotide-gated ion channel 1 OS=Arabidopsis	TraesCS7B02G232600.1	cds chromosome:IWGSC:7B:435807132:435815545:1
MSTRG.86127.5	0	0	0	0	0	0	0	0	0	8.559	13.03	0	0	0	3.937	0	2.506	4.196	0	14.603			sp|Q55B06|SPXS1_DICDI	SPX and EXS domain-containing protein 1	TraesCS7B02G271100.2	cds chromosome:IWGSC:7B:497874976:497883424:1
MSTRG.87273.1	12.098	31.295	13.554	0	5.905	0	8.834	11.249	0	0	0	0	0	0	0	0	0	0	0	0
MSTRG.88198.1	0.488	2.026	0	1.532	0.366	2.229	0.358	1.366	0.975	7.923	2.251	5.544	7.336	7.741	2.435	9.426	5.35	2.026	4.301	1.384					TraesCS4A02G425200.1	cds chromosome:IWGSC:4A:696078970:696079182:-1
MSTRG.88636.1	0	0	0.217	1.626	0	0	1.237	0	0	7.923	6.627	15.747	8.468	15.289	3.608	7.832	1.032	0	0	7.652
MSTRG.91113.2	0	0	0	0	0	0	0	0	0	12.292	1.14	5.973	0.011	0	0	9.613	11.526	14.336	0	5.381			sp|Q9S9K4|ASPL2_ARATH	Aspartic proteinase-like protein 2 OS=Arabidopsis	TraesCS7D02G390900.1	cds chromosome:IWGSC:7D:506132555:506142060:1
MSTRG.92616.2	0	0	0	0	0	0	0	0	0	0	43.992	303.421	0	0	385.829	0	0	405.111	197.182	0					TraesCSU02G046000.1	cds chromosome:IWGSC:Un:35924219:35927057:-1
MSTRG.93642.1	0	0	0	0	0	0	0	0	0	0	2.914	30.188	0	0	51.881	0	0	75.359	24.972	0
MSTRG.94113.1	0	0	0	0	0	0	0	0	0	0.01	12.309	26.871	0	0	34.375	0	3.576	39.563	25.222	0					TraesCS3A02G012200.1	cds chromosome:IWGSC:3A:9521428:9523717:1
MSTRG.94164.1	40.344	2.74	80.252	0	71.326	4.429	81.587	19.886	0	0	0	0	0	0	0	0	0	0	0	0
MSTRG.9668.47	0	0	0	4.681	19.924	86.422	0	0	0	0	0	0	0	27.305	0	0	0	0	0	0			sp|Q94KD3|VP52A_ARATH	Vacuolar protein sorting-associated protein	TraesCS1D02G159400.5	cds chromosome:IWGSC:1D:225401141:225424824:1
TRINITY_DN10121_c0_g1_i1	0.108	5.954	13.064	2.752	0.624	0.287	4.247	0.281	0.361	14.104	2.938	52.366	8.816	28.592	8.15	5.223	24.968	16.993	23.679	0.384			sp|E3K7C3|MTAP1_PUCGT	S-methyl-5'-thioadenosine phosphorylase
TRINITY_DN10147_c0_g2_i1	0.141	1.332	4.827	0.824	0.044	0	1.593	0.352	0.41	2.723	0.763	15.666	0.922	8.83	3.878	1.07	16.377	9.528	10.097	0
TRINITY_DN10160_c0_g1_i1	0	0.203	0.676	0.242	0	0	0.236	0.114	0.098	1.532	0.408	3.466	0.663	2.475	0.22	0	5.015	1.332	1.469	0			sp|P40566|YIS7_YEAST	Uncharacterized glycosyl hydrolase YIR007W
TRINITY_DN10186_c0_g1_i1	0	0.185	0.065	0.058	0.055	0.082	0.108	0	0.049	0.48	0.178	1.943	0.528	1.128	0.192	0	1.616	0.324	0.528	0
TRINITY_DN1027_c0_g1_i1	0.083	4.031	4.549	1.327	0.329	0.164	2.399	0.264	0.336	5.188	2.792	25.552	5.035	19.877	5.162	2.945	21.451	9.167	9.013	0.657			sp|O42901|YBA9_SCHPO	Uncharacterized protein C119.09c OS=Schizosaccharomyces
TRINITY_DN10348_c0_g1_i1	0	0.723	0.741	0.533	0.033	0.051	0.688	0	0.066	1.126	0.648	9.415	0.311	9.671	0.69	0.347	8.522	4.542	3.571	0
TRINITY_DN10416_c0_g1_i1	0.033	1.888	1.436	0.174	0.12	0.061	0.885	0.062	0.074	2.095	0.471	7.212	1.15	8.285	1.436	0.847	4.858	2.868	3.859	0.174			sp|Q9UT25|YFY2_SCHPO	Uncharacterized N-acetyltransferase C9.02c
TRINITY_DN10422_c0_g1_i1	0.075	1.711	2.807	1.134	0.153	0	0.855	0	0.18	2.843	0.607	16.437	2.082	6.441	1.992	0.792	6.68	4.172	5.03	0.881
TRINITY_DN1044_c0_g1_i1	0.033	0.097	0.213	0.252	0.044	0	0.118	0	0.016	0.803	0	2.053	0.332	1.443	0.373	0.306	1.753	0.981	0.979	0.037
TRINITY_DN1049_c0_g1_i1	0	0	0.232	0	0	0	0.079	0	0	0.185	0.324	1.903	0.021	3.201	0.115	0.306	0.803	0.25	0.202	0			sp|P82476|CDA_CRYNH	Chitin deacetylase OS=Cryptococcus neoformans
TRINITY_DN1057_c0_g1_i1	0.075	2.532	3.048	0.93	0.493	0.154	2.527	0.325	0.525	4.625	4.11	32.423	1.554	29.424	3.361	2.667	34.214	14.255	11.192	0.174
TRINITY_DN10593_c0_g1_i1	0.24	0.662	2.029	0.087	0.405	0	1.032	0	0	3.175	0.293	9.145	1.046	4.396	1.551	1.403	4.28	3.284	4.003	0.273
TRINITY_DN1069_c0_g1_i2	0	1.702	2.038	0.058	0	0	1.219	0	0	2.843	7.33	17.469	0.425	37.824	0.45	4.695	12.998	6.318	4.818	0
TRINITY_DN1070_c0_g1_i2	0.464	2.082	2.817	2.229	0.526	0	2.35	0.308	0.656	4.745	2.646	26.363	2.973	21.788	5.842	4.237	15.506	11.665	7.103	0.36
TRINITY_DN1076_c0_g1_i2	0	0.212	0.723	0	0.055	0	0.61	0	0.09	0.729	1.778	8.143	0.166	11.964	0	1.987	9.795	2.646	2.14	0
TRINITY_DN1082_c0_g1_i2	0	0.106	0	0	0	0	0.128	0	0	0.452	0	3.906	0	6.298	0.335	0	1.244	0.5	0.758	0
TRINITY_DN1088_c0_g1_i1	0	0.714	0.232	0.107	0	0	0.256	0	0	0.655	0.471	5.83	0.228	6.049	0.192	0.194	2.096	1.73	1.603	0
TRINITY_DN1100_c0_g1_i2	0.149	1.358	1.983	0.688	0	0	0.944	0.193	0	2.788	0.241	10.758	2.144	4.941	0.948	0.889	5.201	4.459	4.127	0.174
TRINITY_DN11012_c0_g1_i1	0	0.415	0.769	0.165	0	0.143	0	0	0	0.535	0.199	3.716	2.155	3.134	1.168	1.07	0.343	0.157	0.211	0
TRINITY_DN1101_c0_g1_i2	0.041	0.706	0.871	0.078	0	0	0.423	0	0.115	0.425	0.356	5.729	0.29	3.029	0.929	0.292	4.094	1.721	1.862	0
TRINITY_DN1108_c0_g1_i1	0.538	1.535	2.02	0.911	0.854	0.184	6.823	0.237	1.188	2.585	14.452	158.531	1.253	232.914	6.761	15.781	142.343	28.694	39.171	0.211
TRINITY_DN11112_c0_g1_i1	0	0.9	0.398	0.087	0	0	0.177	0.079	0.074	1.182	0.293	2.043	0.477	2.8	0.555	0.792	2.635	0.971	0.854	0.136
TRINITY_DN11201_c0_g1_i2	0	1.447	1.52	0.891	0	0	1.18	0	0.361	2.437	0.345	12.611	2.238	6.336	0.565	1.125	5.701	4.875	7.583	0.236
TRINITY_DN11305_c0_g1_i1	0	0.397	0.259	0.233	0	0.072	0.138	0.044	0	0.369	0.157	2.444	0.839	1.625	0.268	0.083	1.793	0.823	1.008	0.149
TRINITY_DN11430_c0_g1_i1	0	0.062	0.491	0.436	0.066	0	0.354	0	0	1.422	0.167	5.389	0.881	0.459	0.709	0.264	1.264	1.665	1.68	0.112
TRINITY_DN11555_c0_g1_i1	0	0.953	2.928	0	0.263	0	0.924	0	0.549	3.425	1.056	10.487	1.419	11.181	1.934	0	8.022	4.819	5.068	0.298
TRINITY_DN11555_c0_g1_i2	0.265	0	0	0	0	0	0	0.088	0	0.194	0	2.033	0	1.185	0	1.042	2.468	0.907	0.422	0
TRINITY_DN11565_c0_g1_i1	0	0.15	0.037	0	0.033	0	0.039	0.035	0.033	0.305	0.042	2.214	0	2.752	0	0	0.715	0.213	0.038	0
TRINITY_DN11631_c0_g1_i1	0	0.176	0.056	0.107	0	0	0.147	0	0.082	0.092	0.345	0.591	0	2.217	0.182	0.097	1.626	0.407	0.374	0
TRINITY_DN11632_c0_g1_i1	0.166	15.631	25.99	4.496	1.544	0.502	8.072	0.861	0.885	20.224	6.902	95.747	19.828	62.527	13.35	8.668	43.099	30.915	34.18	1.699			sp|Q759D2|TIM14_ASHGO	Mitochondrial import inner membrane translocase
TRINITY_DN11660_c0_g1_i1	0.215	0.52	5.3	1.25	0.285	0	0.462	0.141	0	4.366	1.736	13.622	2.611	15.233	1.389	0.556	9.012	4.801	10.721	0.732
TRINITY_DN11733_c0_g1_i1	0	0.053	0.176	0	0.022	0	0.079	0	0.016	0.194	0.063	1.472	0.021	0.765	0.086	0.333	1.812	0.851	0.461	0
TRINITY_DN11743_c0_g1_i1	0	0.088	0.287	0.107	0	0	0.049	0	0	0.138	0.23	0.922	0.155	1.491	0.182	0.375	0.793	0.361	0.317	0
TRINITY_DN11755_c0_g1_i1	0	0.141	0.12	0.078	0.022	0	0.108	0	0	0.194	0.063	0.942	0.135	0.669	0.172	0	0.676	0.25	0.442	0
TRINITY_DN11897_c0_g1_i1	0	0.397	0.269	0.155	0	0.051	0	0	0.164	0.443	0.607	6.541	0.186	5.065	0.862	0.208	3.722	1.878	1.497	0
TRINITY_DN1190_c0_g1_i1	0.041	0	0.213	0.339	0.088	0.092	0.157	0	0.074	0.166	0.45	3.015	0.321	2.083	0.192	0.847	5.515	0.888	0.681	0.347
TRINITY_DN11910_c0_g1_i1	0.124	2.787	2.872	0.562	0.504	0.092	1.426	0.079	0.377	3.618	1.955	22.096	1.388	21.081	1.925	1.264	25.928	10	5.874	0.347			sp|Q12300|RGT2_YEAST	High-affinity glucose transporter RGT2 OS=Saccharomyces
TRINITY_DN11953_c0_g1_i1	0.041	1.217	0.788	0.31	0.11	0	0.442	0.079	0.049	1.551	0.345	6.1	0.632	4.071	1.025	0.514	4.682	1.961	1.622	0.05			sp|O60111|MCP2L_SCHPO	ABC1 family protein MCP2 homolog OS=Schizosaccharomyces
TRINITY_DN11953_c0_g1_i2	0	0	0	0	0	0	0	0	0	0	0	0.881	0	0.468	0	0	0.989	0.481	1.2	0			sp|O60111|MCP2L_SCHPO	ABC1 family protein MCP2 homolog OS=Schizosaccharomyces
TRINITY_DN12017_c0_g1_i2	0.621	11.176	13.954	1.512	2.092	0.512	3.795	0.246	0.525	12.692	2.51	42.67	10.007	33.284	7.192	2.737	26.28	20.129	23.027	1.439			sp|Q7S6S4|TIM16_NEUCR	Mitochondrial import inner membrane translocase
TRINITY_DN1208_c0_g1_i1	0.041	2.743	3.039	0.688	0.186	0.041	1.426	0.026	0.074	3.498	0.878	19.182	1.295	10.961	2.997	1.653	13.566	5.939	6.316	0
TRINITY_DN1220_c0_g1_i1	0	0	0.102	0	0	0	1.18	0	0.074	0.249	2.468	24.651	0	48.307	0.986	2.973	27.417	5.661	4.454	0
TRINITY_DN12238_c0_g1_i2	0	0	0	0	0	0	0	0	0.049	0.166	0.418	0.601	0	1.204	0.096	0	0.94	0.879	0.23	0
TRINITY_DN12251_c0_g1_i1	0	0	0	0	0	0	0	0	0	0	1.307	1.763	0	0	1.896	0	0	1.767	1.257	0
TRINITY_DN12257_c0_g1_i1	0.05	1.156	0.973	0.3	0.142	0.164	0.629	0.105	0.033	1.2	0.68	6.841	0.373	6.173	0.91	1.042	5.005	2.849	4.041	0
TRINITY_DN12280_c0_g1_i1	0.041	1.667	1.334	0.504	0.252	0	1.003	0.097	0.09	1.818	0.607	6.22	1.616	5.046	1.417	0.639	4.809	2.636	2.476	0			sp|Q9XYS3|NOXA_DICDI	Superoxide-generating NADPH oxidase heavy
TRINITY_DN1230_c0_g1_i1	0	0.212	0.38	0.029	0.022	0	0.079	0	0.066	0.462	0.408	2.464	0.114	2.647	0.077	0.153	2.155	0.777	0.883	0
TRINITY_DN12312_c0_g1_i1	0	0.3	0.111	0	0	0	0.098	0	0.082	0.314	0.115	1.883	0.218	0.984	0.096	0.181	0.519	0.611	0.307	0			sp|C4YTQ0|PRM10_CANAW	Pheromone-regulated membrane protein 10
TRINITY_DN12315_c0_g1_i1	0	0	0.167	0	0	0	0	0	0	0.258	0	1.502	0.176	1.042	0.067	0.139	0.744	0.435	0	0		Serine_Peptidases
TRINITY_DN12318_c0_g1_i2	0.257	0.556	0.491	0.446	0	0.133	0.295	0	0.041	1.357	0.763	7.863	0.456	5.619	0.603	0.333	4.947	1.813	1.785	0
TRINITY_DN12326_c0_g1_i1	0	4.763	9.08	1.822	0.274	0.318	2.605	0.202	0.246	6.637	1.642	23.789	8.65	17.679	5.487	3.834	14.242	8.446	10.222	0.819			sp|Q2V2P4|YI156_YEAST	Uncharacterized protein YIL156W-B OS=Saccharomyces
TRINITY_DN12379_c0_g1_i1	0.315	3.678	4.929	1.172	0.153	0.246	2.615	0.105	0.377	5.492	1.83	24.42	3.325	20.422	3.668	3.487	11.529	8.52	9.589	0			sp|Q03161|YMY9_YEAST	Glucose-6-phosphate 1-epimerase OS=Saccharomyces
TRINITY_DN12412_c0_g1_i1	0.315	1.332	4.781	0.669	0.153	0.328	1.435	0.149	0.229	4.274	0.878	26.243	2.01	17.65	3.706	1.334	17.905	10.111	11.662	0.186			sp|A4QQ05|RIFK_MAGO7	Riboflavin kinase OS=Magnaporthe oryzae
TRINITY_DN12454_c0_g1_i3	0.05	0	0	0	0	0	0.039	0	0.025	0.037	0.042	0.982	0	1.739	0.029	0.069	1.969	0.296	0.403	0
TRINITY_DN12476_c0_g1_i1	0	3.211	4.633	0.707	0	0.635	2.016	0.079	0.443	3.554	0.69	22.868	5.356	17.096	3.323	2.07	7.454	5.023	5.049	0.571
TRINITY_DN12495_c0_g1_i1	0.099	1.702	2.724	0.717	0.34	0	1.77	0.132	0.295	5.861	0.889	17.168	1.782	7.874	2.624	1.167	9.707	6.716	6.105	0.347			sp|Q0TVF9|ALG3_PHANO	Dol-P-Man:Man(5)GlcNAc(2)-PP-Dol alpha-1,3-mannosyltransferase
TRINITY_DN12497_c0_g1_i1	0	0.503	1.288	0.688	0.055	0.031	0.442	0.079	0.09	2.215	0.69	8.183	0.829	5.084	1.341	0.667	5.828	3.58	2.707	0.099			sp|Q9Y7N9|YCKC_SCHPO	PX domain-containing protein C1450.12 OS=Schizosaccharomyces
TRINITY_DN12507_c0_g1_i1	0	3.74	2.733	1.24	0.394	0.379	1.937	0.562	0.557	4.468	1.882	21.345	1.927	18.415	4.319	1.889	12.195	9.065	8.091	0			sp|O75832|PSD10_HUMAN	26S proteasome non-ATPase regulatory subunit
TRINITY_DN12521_c0_g1_i2	0	0	0	0	0	0	0.216	0	0	0	0.115	2.674	0	2.36	0.287	0	1.185	0.786	0.365	0
TRINITY_DN12524_c0_g1_i1	0	0	0.296	0	0	0	0.108	0	0	0.425	0.293	3.015	0	1.252	0.067	0	2.047	0.703	0.72	0
TRINITY_DN12536_c0_g1_i2	0.141	7.145	9.543	1.88	0.493	0.451	2.419	0.36	0.869	8.825	4.11	41.919	6.309	42.114	4.118	5.265	17.034	12.21	14.542	0.161			sp|Q6C6Z2|TIM9_YARLI	Mitochondrial import inner membrane translocase
TRINITY_DN12550_c0_g1_i1	0	1.658	1.093	0.116	0.164	0	0.619	0.053	0.139	1.985	0.868	9.976	1.502	9.805	0.46	0.834	6.21	2.877	4.118	0
TRINITY_DN12567_c0_g1_i1	0.207	4.41	4.809	1.357	0.712	0.328	2.163	0.202	0.377	6.655	2.374	23.429	3.843	17.65	4.051	2.459	13.018	11.359	13.217	0.124			sp|O13744|RT07_SCHPO	37S ribosomal protein S7, mitochondrial
TRINITY_DN12582_c0_g1_i2	0.099	6.501	11.776	4.225	0.548	0.42	4.837	0.466	0.484	14.834	2.217	58.025	8.609	23.728	8.82	5.029	37.554	29.203	24.437	1.178
TRINITY_DN12614_c0_g1_i1	0.033	0.9	1.603	0.659	0.099	0	1.121	0.044	0.279	2.492	0.983	14.103	1.026	9.747	1.609	0.806	13.067	5.485	4.3	0.174
TRINITY_DN12689_c0_g1_i1	0	0	1.269	0.436	0.164	0.246	0.433	0	0	2.022	0.293	3.846	1.378	1.109	1.092	0.945	1.077	1.221	1.075	0.843
TRINITY_DN12727_c0_g1_i1	0	4.799	5.726	0.174	1.26	0.174	2.714	0.448	0.303	5.566	0.91	27.195	6.537	16.389	3.103	2.626	11.441	8.427	10.357	0.732
TRINITY_DN12727_c0_g1_i2	0	0.388	0.574	0.213	0	0	0.492	0	0	1.551	0.826	3.386	1.523	1.252	0.699	0	0.5	0.962	0.384	0.273
TRINITY_DN12764_c0_g1_i1	0	1.041	1.371	0.533	0	0	0.678	0.07	0.066	1.772	0.345	7.572	0.974	5.485	1.647	0.556	5.191	2.063	2.889	0			sp|B0DQ09|MDM12_LACBS	Mitochondrial distribution and morphology
TRINITY_DN12779_c0_g1_i1	0.182	3.749	6.838	0.523	0.12	0.748	1.298	0.123	0.221	6.877	2.949	23.789	5.304	24.932	4.003	1.167	11.548	7.733	10.846	0.422
TRINITY_DN12872_c0_g1_i1	0.348	0.106	0.074	0.552	0.055	0	0.796	0.114	0.049	0.222	1.255	16.627	0.073	17.908	0.278	2.709	23.058	2.59	5.279	0
TRINITY_DN12921_c0_g1_i2	0	0	0	0	0	0	0.197	0	0	0.729	0	5.729	0	2.332	0.441	0.903	3.487	0.981	1.804	0			sp|Q6K9N1|CKI1_ORYSJ	Casein kinase 1 OS=Oryza sativa subsp. japonica
TRINITY_DN12971_c0_g1_i1	0.456	2.091	3.558	0.649	0.12	0	3.264	0.352	0.918	4.357	5.961	48.77	0.508	48.766	5.506	2.459	55.578	23.07	14.244	0			sp|P42059|CLAH7_DAVTA	Minor allergen Cla h 7 OS=Davidiella tassiana
TRINITY_DN12971_c0_g1_i2	0	0	0	0	0	0	0	0	0	0.434	0	2.494	0	0.478	0.201	1.834	1.567	0.907	0.298	0			sp|P42059|CLAH7_DAVTA	Minor allergen Cla h 7 OS=Davidiella tassiana
TRINITY_DN12989_c0_g1_i1	0	3.14	1.964	0.262	0	0	2.271	0.264	0.123	2.068	2.259	16.177	2.393	18.367	1.159	0.5	8.11	5.004	5.279	0
TRINITY_DN12997_c0_g1_i1	0.133	1.305	0.649	0.097	0.361	0	0.285	0	0.082	1.643	0.544	4.608	0.818	6.565	0.948	0.695	1.793	2.692	1.881	0
TRINITY_DN12998_c0_g1_i1	0	0	0	0	0	0	0.138	0	0.115	0.517	0	4.067	0	0.44	0.124	0	5.573	2.118	0.346	0
TRINITY_DN1299_c0_g1_i1	0.141	3.343	7.931	1.289	0.58	0.051	3.441	0.211	0.229	9.212	1.265	32.183	5.915	13.455	4.989	2.07	18.023	11.489	14.014	0.223			sp|P78753|ASNS_SCHPO	Probable asparagine synthetase [glutamine-hydrolyzing]
TRINITY_DN129_c0_g1_i1	0.489	19.203	18.179	5.029	1.314	1.332	7.64	0.958	1.074	21.803	8.136	63.715	18.222	62.173	8.59	6.487	26.143	20.073	26.568	0.93			sp|P0CR98|TIM10_CRYNJ	Mitochondrial import inner membrane translocase
TRINITY_DN13142_c0_g1_i1	0	0	0.232	0.087	0.044	0	0.128	0	0.033	0.037	0.094	1.172	0.228	0.803	0.115	0.153	0.255	0.25	0.307	0.062
TRINITY_DN13146_c0_g1_i1	0	0	0	0	0	0	0	0	0	0	0.105	2.714	0	0.306	0.086	0.167	1.185	0.287	0.115	0	ALL40968.1|GH26
TRINITY_DN13220_c0_g1_i1	0	0.723	1.631	0.591	0.066	0	0.865	0.035	0.033	1.708	0.596	8.224	1.875	4.53	1.35	0.639	5.789	2.599	2.87	0.112
TRINITY_DN13265_c0_g1_i1	0.215	1.905	4.299	1.076	0.361	0.113	1.976	0.185	0.172	7.818	1.631	20.193	2.662	10.885	4.578	1.681	17.357	10.629	7.122	0.372			sp|Q1K8G0|CBL_NEUCR	Cystathionine beta-lyase OS=Neurospora crassa
TRINITY_DN13291_c0_g1_i1	0	1.623	7.264	1.841	0.372	0.092	3.264	0.062	0.107	9.286	1.119	28.847	9.924	14.239	4.013	2.167	15.937	13.505	16.01	0.744			sp|Q32L22|RPAC1_BOVIN	DNA-directed RNA polymerases I and III
TRINITY_DN13301_c0_g1_i1	0	0.388	0.435	0.281	0.164	0.102	0.344	0.062	0.057	0.748	0.356	2.554	0.943	3.173	0.249	0.32	1.802	1.193	0.605	0
TRINITY_DN13302_c0_g1_i1	0	0	0.102	0	0	0	0	0	0	0.258	0.105	2.073	0.114	1.797	0.259	0.347	1.264	0.657	0.23	0
TRINITY_DN13313_c0_g2_i1	0	0.123	0.12	0	0	0	0.039	0.062	0	0.065	0	0.601	0.135	0.172	0.354	0.194	0.558	0.324	0.269	0.062			sp|P0CP60|ATM_CRYNJ	Serine/threonine-protein kinase TEL1 OS=Cryptococcus
TRINITY_DN13317_c0_g1_i1	0	0.071	0.547	0.126	0.033	0	0.364	0.035	0	0.609	0.596	5.539	0.373	2.685	0.584	0.445	4.751	1.545	1.238	0
TRINITY_DN13386_c0_g1_i1	0.315	9.871	11.295	3.149	1.555	0.328	6.214	0.721	0.672	14.169	2.259	66.75	9.624	40.356	10.831	3.917	34.861	25.115	28.094	0.36		Metallo_Peptidases=BAE61639	sp|O60044|QCR2_NEUCR	Cytochrome b-c1 complex subunit 2, mitochondrial
TRINITY_DN13400_c0_g1_i1	0.099	1.482	1.881	0.281	0.131	0	0.924	0.378	0.295	3.425	1.182	15.636	1.916	8.476	2.375	0.514	8.874	5.245	5.845	0
TRINITY_DN13425_c0_g1_i1	0.025	0.591	0.417	0.097	0.131	0	0.433	0.035	0.016	0.84	0.167	4.898	0.29	2.475	0.479	0.278	4.339	1.915	1.891	0			sp|D4AYW0|ABCG1_ARTBC	ABC transporter G family member ARB_01379
TRINITY_DN13436_c0_g1_i1	0.116	13.293	20.05	4.021	1.533	0.963	6.243	0.492	0.762	28.034	3.503	74.743	14.918	36.964	10.697	5.668	41.864	37.436	42.713	2.059			sp|Q5B0C0|HSP7M_EMENI	Heat shock 70 kDa protein OS=Emericella	TraesCS7D02G422600.1	cds chromosome:IWGSC:7D:543057663:543059615:-1
TRINITY_DN13447_c0_g1_i1	0	0.432	2.363	0.727	0.055	0.143	1.288	0.026	0.107	1.846	1.108	12.991	0.849	6.126	1.274	0.583	6.896	3.913	4.559	0.26
TRINITY_DN13449_c0_g1_i2	0	1.5	6.115	1.327	0.57	0.266	3.097	0.105	0.098	9.055	0.952	27.916	6.889	4.491	3.266	2.751	14.751	11.507	13.438	0.98
TRINITY_DN13451_c0_g1_i1	0	0.362	0.083	0	0	0	0.069	0	0.295	0.378	0.481	1.813	0	2.255	0.192	1.028	1.597	1.415	0.432	0
TRINITY_DN13459_c0_g1_i1	0	0.556	0.537	0.116	0.11	0	0.177	0	0.098	0.314	0.063	4.497	0.477	8.4	0.642	0	5.818	1.008	1.238	0
TRINITY_DN13487_c0_g1_i1	0.033	0.212	0.176	0.126	0	0	0	0.026	0.066	0	0.251	1.723	0	1.175	0.373	0.222	0.98	0.518	0.547	0
TRINITY_DN13532_c0_g1_i1	0	0.529	1.927	0.417	0.044	0	0.619	0	0.107	1.625	0.753	16.687	0.632	10.502	1.226	0.458	11.411	5.439	4.722	0
TRINITY_DN13534_c0_g1_i1	0	0.229	0.473	0.233	0.033	0.051	0.147	0	0	0.609	1.035	6.471	0	8.008	0.345	0.556	9.364	3.21	2.054	0
TRINITY_DN13540_c0_g1_i1	0	1.12	0.463	3.411	0.088	0.891	1.73	0.343	0.951	0.231	4.748	10.477	0.228	22.744	0.498	0.695	28.582	10.444	6.316	0.236
TRINITY_DN13543_c0_g1_i1	0	2.002	2.224	0	0	0	0.905	0	0.188	2.52	4.026	27.625	0.881	36.553	1.226	3.181	16.936	7.234	7.247	0
TRINITY_DN13551_c0_g1_i1	0	0.062	0.574	0.068	0	0	0.256	0	0.057	0.517	0.366	8.033	0.197	7.769	0.517	0.333	5.906	1.887	2.304	0
TRINITY_DN13623_c0_g1_i1	0	0	0.334	0.155	0	0.215	0	0	0.123	1.089	1.182	2.945	0.363	2.341	0.402	0.792	0.931	1.193	0.182	0
TRINITY_DN13644_c0_g1_i1	0	0	0.51	0	0	0	0.157	0	0.254	0	0.178	6.08	0	4.348	0.421	0.542	2.89	0.62	2.064	0
TRINITY_DN13650_c0_g1_i1	0	0.52	0.602	0.184	0.022	0	0.315	0.141	0.025	0.932	0.094	5.99	0.29	4.023	0.45	0.25	4.937	2.035	1.526	0		Metallo_Peptidases=EEH10445	sp|B0DZL3|AMPP1_LACBS	Probable Xaa-Pro aminopeptidase P OS=Laccaria
TRINITY_DN13671_c0_g1_i1	0	0	0.028	0.203	0	0	0.157	0	0	0.018	0.178	1.442	0.021	1.252	0.115	0.472	1.606	0.389	0.413	0.037			sp|Q8GS71|KN4A_ARATH	Kinesin-like protein KIN-4A OS=Arabidopsis
TRINITY_DN136_c0_g1_i2	0	0	0	0.126	0	0	0	0	0.107	0	0	1.152	1.295	1.453	0.172	0.903	0.539	0.13	0.154	0
TRINITY_DN13735_c0_g1_i1	0	3.149	1.862	0.436	0.153	0.164	1.534	0	0.139	2.797	1.433	14.263	3.129	8.496	1.733	1.306	5.779	4.958	4.242	0.087			sp|O14350|SWI3_SCHPO	Swi1-interacting protein swi3 OS=Schizosaccharomyces
TRINITY_DN13754_c0_g1_i1	0	0	0	0	0	0	0.433	0	0	0.803	0.826	4.808	0	5.285	0	0	1.832	1.027	1.43	0
TRINITY_DN13758_c0_g1_i1	0	0.573	0.296	0	0.044	0	0.256	0.141	0.041	0.092	0.178	3.786	0.031	5.762	0.421	0.292	4.702	0.675	1.209	0
TRINITY_DN1375_c0_g1_i1	0	0.282	0.371	0.174	0	0	0.334	0	0	0.462	3.043	6.24	0.912	10.005	0.46	0.306	0.882	1.184	1.641	0
TRINITY_DN13760_c0_g1_i1	0.066	0.688	0.889	0.048	0.044	0	0.226	0.018	0.016	0.914	0.335	4.588	0.155	2.762	0.594	0.681	2.85	1.332	1.094	0
TRINITY_DN13788_c0_g1_i1	0	0.265	0.927	0.359	0	0	0.56	0.044	0.041	1.828	0.23	6.25	0.818	3.631	0.737	0.375	2.38	1.443	1.757	0
TRINITY_DN13857_c0_g1_i1	0	0.37	0.815	0	0	0	0.147	0	0.123	0.674	0.167	2.524	0.352	3.947	0.268	0.792	0.774	0.888	1.257	0
TRINITY_DN1400_c0_g1_i1	0	0.062	0.408	0.291	0	0	0.039	0	0.049	0.462	0.125	2.254	0.176	0.401	0.316	0.097	1.704	0.768	1.353	0.062
TRINITY_DN14022_c0_g1_i1	0	0.062	0	0.107	0	0	0.079	0	0	0	0.042	0.901	0.021	0.545	0.163	0.069	0.646	0.111	0.365	0
TRINITY_DN14046_c0_g1_i1	0	0	0.074	0	0	0	0.187	0	0.049	0.111	0.418	2.003	0	2.207	0.057	0	2.126	0.379	0.538	0			sp|Q8GXR2|PLT6_ARATH	Probable polyol transporter 6 OS=Arabidopsis
TRINITY_DN14056_c0_g1_i1	0.075	2.858	5.884	1.492	1.04	0.379	4.031	0.325	0.09	7.92	1.506	33.515	4.755	19.848	5.899	2.445	28.817	15.291	15.53	0			sp|O13753|VA0D_SCHPO	V-type proton ATPase subunit d OS=Schizosaccharomyces
TRINITY_DN14080_c0_g1_i1	0	4.596	10.711	3.498	0.57	0.42	5.27	0.861	0.516	17.631	4.193	44.383	12.835	15.94	6.206	5.835	19.14	14.68	19.965	2.394
TRINITY_DN14107_c0_g1_i1	0.215	3.352	2.326	0.853	0.241	0.072	1.494	0.088	0.336	3.757	1.987	30.47	1.999	17.488	3.697	2.584	11.539	8.51	9.598	0
TRINITY_DN14113_c0_g1_i2	0	1.508	2.057	0.969	0.164	0	1.131	0.158	0.188	3.766	0.837	15.666	2.196	9.164	2.356	0.834	12.743	7.391	9.982	0.087
TRINITY_DN14148_c0_g1_i1	0	0.362	0.528	0.233	0.088	0	0.511	0	0	1.163	0.209	4.237	1.367	0.526	0.163	0.083	1.009	0.416	0.969	0.223
TRINITY_DN14166_c0_g1_i1	0	0.679	11.841	4.729	0.186	0.195	4.69	0	0.057	15.452	1.725	67.251	10.722	8.104	9.739	4.376	18.376	8.797	19.6	0.967
TRINITY_DN14184_c0_g1_i2	0.431	10.788	22.96	3.643	2.048	0.512	7.816	0.747	0.508	26.224	3.116	88.546	16.72	43.949	13.053	5.029	49.749	37.806	43.241	1.129			sp|Q9USI5|STI1_SCHPO	Heat shock protein sti1 homolog OS=Schizosaccharomyces
TRINITY_DN14197_c0_g1_i1	0	0.547	0.584	0.068	0.033	0.092	0.226	0.062	0.025	0.738	0.324	4.237	0.611	2.016	0.603	0.181	1.969	1.887	1.766	0			sp|Q09832|TYW2_SCHPO	tRNA wybutosine-synthesizing protein 2 OS=Schizosaccharomyces
TRINITY_DN14253_c0_g1_i1	0	0	0.056	0	0	0	0.187	0	0	0.277	0.136	0.992	0.083	0.879	0.278	0.125	1.41	0.574	0.374	0			sp|Q15811|ITSN1_HUMAN	Intersectin-1 OS=Homo sapiens GN=ITSN1
TRINITY_DN14287_c0_g1_i2	0.075	4.278	2.214	0.3	0.241	0.297	1.032	0.519	0.565	3.009	1.631	16.687	2.776	22.18	2.174	1.417	11.686	4.875	5.817	0.248
TRINITY_DN14311_c0_g1_i1	0	0.864	1.418	0.165	0.11	0	0.6	0.035	0.066	1.911	0.178	8.594	0.995	3.918	0.871	0.528	2.831	3.127	4.761	0.397
TRINITY_DN14368_c0_g1_i1	0.29	16.266	24.127	5.242	2.946	0.748	8.721	1.046	0.787	24.821	7.404	91.12	22.314	79.078	16.251	13.947	43.539	29.638	40.956	2.183			sp|Q945M1|NDUB9_ARATH	NADH dehydrogenase [ubiquinone] 1 beta
TRINITY_DN14372_c0_g1_i1	0	0.309	1.807	0.591	0.044	0	0.413	0	0	1.985	0.722	6.831	1.45	0.956	1.513	0.834	5.495	2.192	2.342	0.074
TRINITY_DN14423_c0_g1_i1	0	1.544	1.492	0.145	0.142	0.143	0.777	0	0.041	2.086	0.439	9.576	1.378	4.482	1.006	0.986	4.976	3.33	3.292	0.161
TRINITY_DN14426_c0_g1_i1	0	0.847	0.593	0.155	0	0.041	0.374	0.053	0	1.237	0.345	4.968	0.321	2.857	0.613	0.458	3.967	2.137	1.325	0
TRINITY_DN14491_c0_g1_i1	0	0.406	0.435	0	0	0	0.088	0	0.033	0.268	0.481	1.923	0.052	2.838	0.192	0.472	1.362	0.648	0.787	0
TRINITY_DN14496_c0_g1_i1	0.066	0.344	1.964	0.746	0.186	0	0.59	0.088	0.041	2.252	0.335	7.893	1.129	1.519	0.804	0.181	5.319	2.886	3.283	0.161		Cysteine_Peptidases=EFP77365	sp|Q10075|PCS_SCHPO	Glutathione gamma-glutamylcysteinyltransferase
TRINITY_DN14523_c0_g1_i1	0.141	4.313	9.33	2.083	0.416	0.143	3.372	0.264	0.287	13.006	1.976	40.707	7.252	15.949	5.008	1.959	25.859	18.38	15.924	0.794
TRINITY_DN14525_c0_g1_i1	0.215	8.653	10.924	1.899	0.712	0.441	4.523	0.07	0.574	12.775	1.715	40.697	6.112	26.327	6.062	2.903	20.041	14.44	15.213	0.732
TRINITY_DN14537_c0_g1_i1	0.091	2.205	2.261	0.126	0	0	1.18	0	0.188	3.249	3.587	34.847	0.59	25.716	1.216	2.07	22.049	12.025	9.973	0			sp|Q09745|YB64_SCHPO	Uncharacterized protein C12C2.04 OS=Schizosaccharomyces
TRINITY_DN14553_c0_g1_i2	0	0.476	0.528	0.184	0.055	0.133	0.128	0.088	0.049	0	0.523	3.015	0.176	0.736	0.46	0.236	2.576	1.961	1.526	0.099
TRINITY_DN14571_c0_g1_i1	0.157	8.574	15.538	3.062	2.191	0.543	6.528	0.976	0.344	21.387	3.419	62.142	12.98	32.405	9.011	3.195	37.907	28.204	32.836	1.526			sp|P87153|TCPH_SCHPO	Probable T-complex protein 1 subunit eta
TRINITY_DN14595_c0_g1_i1	0	11.282	19.309	6.821	1.369	1.158	5.919	0.422	0.606	22.763	4.706	87.584	18.709	32.673	10.285	4.223	34.518	27.843	35.533	1.401			sp|Q9D0I8|MRT4_MOUSE	mRNA turnover protein 4 homolog OS=Mus musculus
TRINITY_DN14631_c0_g1_i1	0	0	0	0.087	0	0	0.364	0	0	0.166	0.105	1.543	0	1.462	0.163	0.5	1.322	0.555	0.115	0
TRINITY_DN14672_c0_g1_i1	0	0.714	0.852	0.281	0.186	0.113	0.708	0.07	0.328	0.84	1.474	9.806	0.238	10.99	1.063	0.361	6.102	2.1	3.484	0			sp|Q9P7D3|YOFG_SCHPO	WHI2-like protein P4H10.16c OS=Schizosaccharomyces
TRINITY_DN14689_c0_g1_i1	0.017	0.856	0.426	0.184	0.088	0.051	0.305	0.044	0.057	1.015	0.303	5.479	0.425	3.966	0.709	0.375	3.497	1.73	1.286	0.037			sp|Q6NRP2|PSME4_XENLA	Proteasome activator complex subunit 4
TRINITY_DN14690_c0_g1_i1	0	0.335	0.778	0.242	0	0.072	0.246	0.044	0.041	0.609	0.335	3.886	0.176	2.045	0.575	0.181	2.713	1.471	0.662	0
TRINITY_DN14711_c0_g1_i1	0.116	3.775	5.467	1.017	0.164	0.061	1.475	0.193	0.287	4.366	0.857	15.876	1.823	14.287	3.045	1.403	14.33	10.231	11.566	0.211			sp|Q9QYJ3|DNJB1_MOUSE	DnaJ homolog subfamily B member 1 OS=Mus
TRINITY_DN14724_c0_g1_i1	0	0.159	0.139	0	0.12	0	0	0	0.049	0.055	0.073	1.222	0.041	1.223	0.057	0.111	1.89	0.065	0.384	0
TRINITY_DN14727_c0_g1_i1	0	0	0	0	0	0	0.098	0	0	0.129	0.105	2.174	0	1.099	0.086	0	2.4	0.583	0.48	0			sp|O42790|PLB_NEUCR	Lysophospholipase OS=Neurospora crassa (strain
TRINITY_DN14740_c0_g1_i1	0	0	0	0	0	0	0.069	0	0	0	0.105	0.581	0.041	1.099	0.029	0.056	0.529	0.167	0.115	0
TRINITY_DN14754_c0_g1_i1	0	0.212	0.213	0.058	0.055	0	0.128	0.018	0	0.351	0	1.012	0.435	0.707	0.259	0.181	0.931	0.416	0.298	0.124			sp|Q7ZV90|PIF1_DANRE	ATP-dependent DNA helicase PIF1 OS=Danio
TRINITY_DN14755_c0_g1_i1	0.762	9.288	10.442	2.015	1.161	0.225	4.926	0.633	0.779	14.972	3.67	54.61	11.043	37.48	6.818	3.945	28.2	19.074	25.829	0.757
TRINITY_DN14767_c0_g1_i1	0	0	0.037	0	0.066	0	0.108	0.035	0.033	0.129	0.084	0.561	0.249	0.411	0.067	0.069	0.744	0.361	0.269	0.062
TRINITY_DN14807_c0_g1_i1	0.066	0.044	0.371	0.097	0.044	0	0.462	0	0.082	0.286	0.052	2.795	0.145	5.562	0.249	0.347	1.107	0.611	1.334	0
TRINITY_DN14811_c0_g1_i1	0.066	4.058	4.429	0.64	0.186	0.143	1.553	0.132	0.164	3.923	1.443	16.998	3.843	12.07	2.634	1.889	8.159	5.837	6.892	0.236
TRINITY_DN14822_c0_g1_i1	0	0	0.232	0	0	0	0.098	0	0.025	0.175	0.115	2.745	0.083	4.405	0.182	0.5	2.204	0.907	0.825	0			sp|Q9C101|YKT8_SCHPO	Uncharacterized MFS-type transporter PB1E7.08c
TRINITY_DN14860_c0_g1_i1	0	0.75	1.269	0.979	0.23	0.287	0.777	0.044	0.123	1.385	0.878	9.916	0.684	5.887	0.613	0.445	6.612	4.246	3.398	0
TRINITY_DN14926_c0_g1_i1	0.116	2.54	3.363	0.397	0.46	0.236	1.711	0.185	0.098	4.883	0.91	17.469	2.756	10.101	2.911	1.111	9.109	6.586	8.639	0.322			sp|P32902|RT04_YEAST	37S ribosomal protein MRP4, mitochondrial
TRINITY_DN14966_c0_g1_i1	0.298	9.456	14.806	2.703	0.997	0.307	6.519	0.879	0.287	20.123	2.008	57.024	11.571	29.366	8.619	2.806	35.194	24.208	28.603	1.029			sp|Q9Y7I8|ZUO1_SCHPO	Zuotin OS=Schizosaccharomyces pombe (strain
TRINITY_DN14986_c0_g1_i1	0	0.679	1.242	0.126	0.088	0	0.334	0	0.074	1.348	0.314	7.042	0.798	2.265	0.929	0.278	3.585	3.099	4.022	0.099			sp|P0CM78|GRC3_CRYNJ	Polynucleotide 5'-hydroxyl-kinase GRC3 OS=Cryptococcus
TRINITY_DN14998_c0_g1_i1	0	2.479	5.374	1.211	0.898	0.307	1.858	0.211	0.09	9.332	0.627	22.767	4.154	6.689	3.61	1.5	15.163	10.952	12.152	0.608			sp|O94268|NOP2_SCHPO	25S rRNA (cytosine-C(5))-methyltransferase
TRINITY_DN15002_c0_g1_i1	0	0.353	1.927	0.62	0.044	0	0.973	0.237	0.041	2.945	0.408	10.457	1.616	4.482	1.714	0.194	8.336	4.755	5.625	0.087			sp|Q00267|NHOA_SALTY	N-hydroxyarylamine O-acetyltransferase OS=Salmonella
TRINITY_DN15060_c0_g1_i1	0	0.926	1.668	0.339	0.131	0.031	0.777	0.044	0.016	2.511	0.23	7.783	0.736	3.937	1.504	0.472	6.279	4.616	3.676	0			sp|P25170|TRPG_PHACH	Multifunctional tryptophan biosynthesis
TRINITY_DN15068_c0_g1_i1	0.124	5.813	5.689	1.357	0.646	0.328	4.051	0.571	0.68	9.111	3.127	39.956	2.973	31.201	6.301	2.501	26.466	15.707	13.649	0.446			sp|Q04013|YHM2_YEAST	Citrate/oxoglutarate carrier protein OS=Saccharomyces
TRINITY_DN15105_c0_g1_i1	0.05	2.32	1.714	0.388	0	0	2.409	0.035	2.45	3.868	3.419	14.955	0.414	9.384	3.629	3.042	24.272	22.191	5.817	0			sp|B0BK71|MSP1_MYCSO	Dye-decolorizing peroxidase msp1 OS=Mycetinis
TRINITY_DN15153_c0_g1_i1	0.075	0.856	2.196	0.843	0.099	0.072	0.787	0.141	0.172	3.701	0.533	12.861	1.026	4.625	1.647	0.861	7.836	4.107	4.252	0.174
TRINITY_DN15221_c0_g1_i1	0.066	5.945	4.383	1.957	0.46	0.133	3.854	0.281	0.262	5.261	2.562	37.872	2.352	29.586	5.353	1.473	23.44	16.281	15.54	0.434			sp|Q10169|DSK2_SCHPO	Deubiquitination-protection protein dph1
TRINITY_DN15243_c0_g1_i1	0	4.763	7.505	2.665	0.537	0.963	3.677	0	0	10.338	2.468	32.774	7.894	21.502	7.939	3.431	14.448	11.498	15.165	1.228
TRINITY_DN15258_c0_g1_i1	0	0	0.093	0	0	0	0	0	0	0.222	0.188	1.052	0.3	0	0.077	0	0.255	0.083	1.19	0
TRINITY_DN15333_c0_g1_i1	0.24	0	0	0	0	0	0.354	0.158	0	0.646	0	1.162	0.321	6.852	0.9	0.931	2.576	0.703	1.709	0
TRINITY_DN15342_c0_g1_i1	0	0.37	0.167	0	0.044	0	0.236	0.088	0	0.258	0.105	1.472	0.145	1.386	0.211	0.181	0.94	0.62	0.586	0
TRINITY_DN15350_c0_g1_i1	0.041	0.741	0.556	0.184	0	0	0.216	0	0.049	0.711	0.314	4.167	0.435	2.8	0.776	0.681	2.85	1.48	1.776	0
TRINITY_DN15353_c0_g1_i1	0	0	0.269	0	0	0	0	0	0.066	0.074	0.094	2.604	0.249	1.156	0.077	0.292	0.5	0.648	0.202	0
TRINITY_DN15373_c0_g1_i1	0	0.803	1.807	0.223	0.142	0.318	0.216	0.132	0.057	1.302	0.659	6.941	1.108	4.081	0.785	0.931	4.212	1.314	2.227	0.124
TRINITY_DN15375_c0_g1_i2	0.033	0.3	0	0	0.077	0	0.501	0	0	1.145	0.46	5.9	0.57	1.319	0.871	0.75	4.085	1.212	2.112	0.211			sp|P47979|ZFS1_SCHPO	Zinc finger protein zfs1 OS=Schizosaccharomyces
TRINITY_DN15376_c0_g1_i1	0.075	24.266	2.409	1.88	0.383	0.225	2.271	0.413	0.975	7.375	0.973	6.12	3.356	59.927	9.94	3.82	4.653	5.032	0.931	0.496			sp|Q5ACV9|SOD6_CANAL	Cell surface superoxide dismutase [Cu-Zn]
TRINITY_DN15378_c0_g1_i1	0	1.27	4.864	2.015	0.416	0.113	4.67	0	0.066	6.609	3.367	36.049	5.501	9.069	4.558	3.667	6.083	2.544	8.658	0.608
TRINITY_DN15403_c0_g1_i1	0	1.747	2.502	0.475	0.077	0	1.082	0.035	0.107	2.317	0.491	10.878	1.015	6.794	1.484	0.959	6.964	4.135	3.83	0.136
TRINITY_DN15419_c0_g1_i1	0	2.911	3.799	1.046	0.449	0.379	2.124	0.395	0.18	5.28	1.725	25.782	2.838	22.945	3.562	1.931	18.307	10.314	11.278	0.422
TRINITY_DN15430_c0_g1_i1	0.952	8.9	13.277	2.926	1.457	0.277	4.405	0.527	0.492	15.692	4.758	39.064	8.743	34.125	10.659	2.806	28.073	20.064	24.447	0.881			sp|Q4P7J4|FIS1_USTMA	Mitochondrial fission 1 protein OS=Ustilago
TRINITY_DN15448_c0_g1_i1	0.066	1.676	2.715	1.076	0.602	0.502	2.527	0.132	0.615	4.311	2.562	28.226	3.356	18.845	2.413	2.334	22.098	7.104	6.114	0.397
TRINITY_DN15545_c0_g1_i1	0.124	0	0.028	0.058	0.055	0	0.138	0	0	0.046	0.188	1.012	0.031	0.784	0.105	0.111	0.872	0.564	0.557	0
TRINITY_DN15548_c0_g1_i1	0	2.435	6.866	1.25	0.405	0.256	2.006	0.158	0.107	9.065	1.025	24.49	3.802	7.291	2.892	1.181	11.558	9.398	9.838	0.496
TRINITY_DN15575_c0_g1_i1	0.224	1.861	1.566	1.066	0.153	0.154	0.846	0.097	0.09	1.043	0.784	6	0.653	9.327	1.389	1.848	7.993	1.813	2.083	0.087
TRINITY_DN15600_c0_g1_i1	0	2.249	2.983	0	0.263	0.041	1.023	0.255	0.156	3.637	0.889	12.46	2.041	7.454	1.848	0.986	10.353	6.299	6.095	0.36			sp|P0CR57|PRP45_CRYNB	Pre-mRNA-processing protein 45 OS=Cryptococcus
TRINITY_DN15606_c0_g1_i1	0.298	3.837	9.33	3.091	0.35	0.307	3.441	0.334	0.311	9.452	2.583	44.403	3.947	20.919	6.091	1.875	33.313	19.981	25.57	0.347			sp|Q9LFP1|VA713_ARATH	Vesicle-associated membrane protein 713
TRINITY_DN15606_c0_g1_i2	0	0.291	0	0	0	0	0	0	0	0.175	0	2.434	0.456	0.554	0.211	0.347	1.42	0.537	0.24	0			sp|Q9FMR5|VA714_ARATH	Vesicle-associated membrane protein 714
TRINITY_DN15609_c0_g1_i1	0	3.484	4.688	1.318	0.438	0.338	1.534	0	0.066	6.858	0.962	23.629	5.283	12.605	3.61	1.125	13.321	10.305	10.491	0.248
TRINITY_DN15623_c0_g1_i1	0.108	5.487	6.263	2.568	0.142	0.225	3.284	0.316	0.77	6.369	3.21	33.816	4.548	31.048	5.813	3.39	18.366	12.451	13.534	0.062		Metallo_Peptidases=EFP82385	sp|Q2H1T8|LAP1_CHAGB	Leucine aminopeptidase 1 OS=Chaetomium globosum
TRINITY_DN15653_c0_g1_i1	0.116	2.532	1.835	0.727	0.34	0.174	0.924	0.149	0.172	3.166	0.732	10.597	1.689	10.254	2.03	1.042	9.482	4.662	4.511	0.136			sp|Q99K85|SERC_MOUSE	Phosphoserine aminotransferase OS=Mus musculus
TRINITY_DN15671_c0_g1_i1	0	0.194	0.065	0.058	0.055	0	0.059	0.053	0	0.203	0.314	0.932	0.104	0.717	0.249	0.097	0.686	0.5	0.269	0
TRINITY_DN15676_c0_g1_i1	0	0.714	6.829	2.306	0.646	0.359	2.635	0.088	0.041	8.04	1.495	37.271	4.776	14.067	4.405	2.07	19.238	10.175	13.937	0.558			sp|B0M3E8|UGE1_PEA	Bifunctional UDP-glucose 4-epimerase and UDP-xylose
TRINITY_DN15680_c0_g1_i1	0.439	13.558	21.422	4.167	1.501	0.851	7.934	1.081	0.418	26.427	5.103	76.997	15.933	56.726	12.469	4.334	48.535	31.969	38.806	1.203			sp|P32473|ODPB_YEAST	Pyruvate dehydrogenase E1 component subunit
TRINITY_DN15690_c0_g1_i1	0.886	0.062	1.427	0.281	0.263	0	5.673	0.387	0.885	1.255	5.804	92.773	0.477	148.284	3.735	15.67	96.746	17.64	18.774	0.347
TRINITY_DN15691_c0_g1_i1	0	0.953	0.871	0.242	0.186	0.072	0.285	0.044	0.164	1.292	0.167	2.905	0.943	3.115	0.996	0.625	2.635	2.368	3.139	0.397
TRINITY_DN15699_c0_g1_i1	0	0.388	0.343	0.63	0.164	0.072	0.452	0.158	0.131	1.486	0.052	9.175	0.207	5.065	1.111	0.472	2.684	2.165	3.484	0.248
TRINITY_DN15740_c0_g1_i1	0.265	7.233	10.322	3.091	1.818	0.051	4.985	0.633	0.402	19.477	2.667	58.717	11.634	24.789	8.829	2.987	33.343	24.68	28.507	1.029			sp|Q10147|TCPB_SCHPO	Probable T-complex protein 1 subunit beta
TRINITY_DN15759_c0_g1_i2	0.323	9.156	9.757	2.665	1.139	0.164	4.641	0.624	1.115	10.588	2.667	35.098	4.931	28.373	9.682	3.792	18.699	15.133	9.637	0.744
TRINITY_DN157_c0_g1_i1	0	0	0.241	0.068	0	0	0.069	0	0.057	0.065	0	2.835	0	2.045	0.192	0.264	0.137	0.5	0.336	0
TRINITY_DN1590_c0_g1_i1	0.099	4.472	5.346	0.988	0.438	0.154	1.829	0.097	0.148	7.274	1.401	21.395	5.749	13.79	3.467	1.306	12.215	9.315	11.125	0.521			sp|Q6FUD0|PYRG_CANGA	CTP synthase OS=Candida glabrata (strain
TRINITY_DN15919_c0_g1_i1	0.795	45.233	92.951	19.35	6.539	3.279	33.753	4.684	3.057	93.848	24.595	333.398	64.332	200.901	50.458	35.799	176.038	108.728	143.093	3.845
TRINITY_DN15953_c0_g1_i1	0	0.812	1.186	0.581	0.099	0	1.042	0.141	0.131	2.391	0.952	16.427	0.704	8.878	1.743	0.097	11.891	5.263	7.333	0
TRINITY_DN16024_c0_g1_i1	0.108	2.496	1.946	0.378	0.142	0	1.121	0.07	0.066	3.415	1.014	9.746	2.424	9.25	0.958	0.681	4.104	3.691	5.298	0.124
TRINITY_DN16056_c0_g1_i2	0	0.106	0	0	0	0	0.236	0	0	0.222	0.512	1.883	0.218	3.402	0.536	0.861	1.42	1.008	0.442	0
TRINITY_DN1605_c0_g1_i1	0	3.625	5.467	1.415	0.504	0	2.016	0.185	0.172	6.212	1.223	24.48	4.444	18.052	3.457	2.223	11.264	7.298	13.946	0.98
TRINITY_DN16060_c0_g1_i1	0	0.044	0	0.058	0	0	0	0	0	0.203	0.251	1.222	0	0.726	0.048	0.097	0.754	0.398	0.067	0
TRINITY_DN16072_c0_g1_i1	0.513	5.795	18.976	5.891	1.741	0.266	4.867	0.483	0.156	11.898	6.557	90.369	4.268	33.772	7.01	4.751	111.527	40.239	49.278	0.595
TRINITY_DN16087_c0_g1_i1	0.215	1.2	0.704	0.31	0.887	0	0.541	0	0.066	0.914	1.15	5.138	1.005	7.741	0.632	0.431	5.485	1.332	0.864	0.384
TRINITY_DN16100_c0_g1_i1	0	0	0	0.194	0.066	0	0.059	0	0	0.175	0.073	1.242	0.083	0.927	0.057	0	0.069	0.324	0.317	0.099
TRINITY_DN16112_c0_g1_i1	0.033	1.597	0	0	0	0.082	0.354	0.044	0.066	0.342	0.293	6.08	1.16	2.169	0.757	0.82	2.292	1.517	2.668	0.087			sp|O14176|PRP40_SCHPO	Pre-mRNA-processing protein prp40 OS=Schizosaccharomyces
TRINITY_DN16113_c0_g1_i1	0	0.106	0	0	0	0	0.354	0	0.033	0.711	1.046	5.9	0.218	7.253	0.287	0.597	3.918	1.36	1.017	0
TRINITY_DN16209_c0_g1_i1	0	0.415	1.371	0.998	0.044	0.061	0.973	0.053	0.033	2.723	0.324	14.925	1.492	3.039	1.207	0.389	7.307	5.143	5.529	0.236			sp|O13878|UTP17_SCHPO	U3 small nucleolar RNA-associated protein
TRINITY_DN16235_c0_g1_i1	0.174	5.742	8.432	1.638	0.712	0.092	3.186	0.053	0.262	9.268	2.342	27.155	8.142	27.035	3.725	3.098	13.537	11.276	13.61	1.228			sp|A5USF9|RL13_ROSS1	50S ribosomal protein L13 OS=Roseiflexus
TRINITY_DN16239_c0_g1_i1	0.364	10.7	10.387	2.451	0.854	0.564	4.965	0.545	0.287	12.683	2.531	43.962	9.147	38.177	6.148	4.042	23.92	17.243	26.492	0.558			sp|P41836|PRS8_SCHPO	26S proteasome regulatory subunit 8 homolog
TRINITY_DN16323_c0_g1_i1	0.34	3.625	6.013	0.591	0.099	0.143	2.429	0.176	0.082	7.957	1.799	25.873	3.988	14.172	4.405	1.292	19.375	13.524	13.073	0.496			sp|Q8WZY4|RPN8_NEUCR	26S proteasome regulatory subunit rpn-8
TRINITY_DN16332_c0_g1_i3	0	0	0.232	0	0	0	0	0	0	0.582	0.596	2.514	0.373	3.928	0.192	0	1.234	0	1.526	0
TRINITY_DN16417_c0_g1_i1	0.414	5.663	9.58	0.93	1.216	0	2.389	0.422	0.148	9.314	1.454	27.285	6.785	20.097	3.907	2.584	13.87	10.952	13.726	1.054			sp|Q9P7Y7|P5CR_SCHPO	Pyrroline-5-carboxylate reductase OS=Schizosaccharomyces
TRINITY_DN16437_c0_g1_i1	0	0	0	0.514	0	0	0.029	0	0	0.452	0.763	0.391	0.228	0.612	0.46	0.306	0.558	0.444	0.461	0			sp|P0CT39|TF26_SCHPO	Transposon Tf2-6 polyprotein OS=Schizosaccharomyces
TRINITY_DN16484_c0_g1_i1	0	0.679	0.204	0.048	0.088	0	0.128	0	0	0.471	0.251	1.813	0.466	3.22	0.517	0.167	1.097	0.574	0.701	0.149			sp|Q5ZJL8|ABHDD_CHICK	Protein ABHD13 OS=Gallus gallus GN=ABHD13
TRINITY_DN16517_c0_g1_i1	0	2.258	2.965	0.785	0.548	0	2.32	0.176	0.328	3.369	1.192	18.771	2.652	6.059	1.666	0.722	9.335	6.975	6.805	0.434			sp|Q9UT34|YIQ9_SCHPO	Uncharacterized protein C824.09c OS=Schizosaccharomyces
TRINITY_DN16728_c0_g1_i1	0	0.679	1.019	0.058	0	0	0.56	0	0	1.108	0.45	5.94	0.311	4.176	0.508	0.514	4.006	2.035	1.795	0
TRINITY_DN16915_c0_g1_i1	1.714	19.838	25.823	18.652	2.694	2.654	11.12	1.494	2.057	16.089	8.104	92.222	15.456	74.453	20.12	22.616	72.043	29.629	38.221	4.452
TRINITY_DN17076_c0_g1_i1	0	0.247	0.232	0.029	0.011	0	0.187	0	0.025	0.397	0.115	2.624	0.124	1.73	0.134	0.153	2.566	1.018	1.161	0.025
TRINITY_DN17080_c0_g1_i2	0.911	31.923	67.601	15.746	4.162	1.978	24.285	1.986	2.368	67.735	12.967	242.749	41.914	124.069	33.632	17.517	117.492	87.138	93.517	2.939			sp|O13350|ATP7_KLULA	ATP synthase subunit d, mitochondrial OS=Kluyveromyces
TRINITY_DN17107_c0_g1_i1	0	1.156	0.565	0.242	0.066	0	0	0	0.057	1.283	0.742	3.716	0.684	5.122	1.13	0.417	2.772	2.22	1.19	0
TRINITY_DN17117_c0_g1_i2	0	4.375	9.692	1.667	1.051	0.379	3.677	0.369	0.156	13.883	2.677	42.209	7.2	21.396	6.589	1.834	27.828	19.259	20.253	1.029			sp|P53587|SUCB_NEOFR	Succinate--CoA ligase [ADP-forming] subunit
TRINITY_DN17118_c0_g1_i1	0	0	0	0	0	0	0	0	0	0.295	0.22	1.512	0	1.443	0	0	0.5	0.241	0	0		Metallo_Peptidases=EFP85947	sp|O94580|YQ77_SCHPO	Ubiquitin and WLM domain-containing metalloprotease
TRINITY_DN17118_c0_g1_i2	0	1.058	1.149	0.397	0	0	0.197	0	0	2.105	0.094	8.294	0.787	5.409	1.408	0.722	5.838	3.358	2.697	0		Metallo_Peptidases=EFP85947	sp|O94580|YQ77_SCHPO	Ubiquitin and WLM domain-containing metalloprotease
TRINITY_DN17124_c0_g1_i1	0.124	10.903	19.541	4.603	2.125	1.373	6.371	1.099	0.942	22.984	4.11	77.778	13.83	41.035	13.35	5.196	43.324	27.714	30.926	1.6			sp|Q9P370|BUD20_SCHPO	Zinc finger protein bud20 OS=Schizosaccharomyces
TRINITY_DN17126_c0_g1_i3	0.033	1.182	0.649	0.242	0.208	0.072	0.836	0.132	0.18	0.932	0.376	7.763	0.518	7.559	1.293	0	5.554	2.905	2.035	0
TRINITY_DN17149_c0_g1_i1	0	0.812	0.723	0.455	0.197	0.266	0.61	0.079	0.049	0.942	0.241	4.808	0.839	3.498	0.68	0.611	4.026	2.1	2.092	0.05			sp|O74999|RAD7_SCHPO	DNA repair protein rhp7 OS=Schizosaccharomyces
TRINITY_DN17150_c0_g1_i1	0.149	1.341	1.343	0.233	0.055	0.123	0.688	0.062	0.049	2.317	0.617	6.741	1.005	6.336	1.283	0.861	6.426	3.191	3.417	0.248			sp|Q10475|IF4G_SCHPO	Eukaryotic translation initiation factor
TRINITY_DN17176_c0_g1_i1	0	0	0	0	0	0	0.079	0.026	0.025	0.323	0	0.561	0	0.038	0.115	0	1.89	0.287	0.221	0
TRINITY_DN17183_c0_g1_i1	0.547	8.362	5.884	1.134	0.153	0.4	4.346	0.958	0.647	4.661	5.323	28.206	2.507	38.034	6.56	4.765	26.937	12.155	12.622	0.087
TRINITY_DN17184_c0_g1_i3	0	0	0	0	0	0	0.197	0	0	0	0.282	0	0	1.978	1.331	0	0.784	0.518	0.729	1.005
TRINITY_DN17195_c0_g1_i1	0	0.044	0.287	0	0	0	0.698	0	0.172	0	0.68	7.272	0	15.844	0.268	0.917	9.913	2.165	1.229	0			sp|A0A084B9Z1|SAT3_STACB	Short-chain dehydrogenase/reductase
TRINITY_DN17197_c0_g1_i2	0.24	9.579	12.592	3.634	1.38	0.154	6.666	0.65	0.541	20.603	3.346	62.693	10.991	37.241	9.892	3.834	40.65	26.095	27.605	1.116			sp|P09624|DLDH_YEAST	Dihydrolipoyl dehydrogenase, mitochondrial
TRINITY_DN17208_c0_g1_i1	0	0.459	0.732	0.213	0.153	0	0.59	0	0.18	0.812	0.125	2.765	0.891	3.287	0.728	0.792	2.272	1.452	1.382	0.174
TRINITY_DN17209_c0_g1_i1	0.05	0.238	0.658	0.814	0.033	0.205	0.167	0	0.139	0.065	0.617	3.826	0.104	3.756	0.613	0.82	6.837	0.722	1.382	0.112
TRINITY_DN17210_c0_g1_i2	0	0	0	0	0	0	0.069	0	0	0.129	0.042	1.092	0	1.061	0.029	0.069	0.333	0.13	0	0
TRINITY_DN17212_c0_g1_i1	0	0.335	0.222	0.329	0.066	0	0.324	0	0	0.868	0.659	4.678	0.953	2.399	0.527	0.236	1.675	0.583	0.633	0
TRINITY_DN17214_c0_g1_i1	0	0	0	0	0	0	0.088	0	0	0.028	0	1.272	0	0.65	0.029	0.056	0.764	0.204	0.278	0
TRINITY_DN17219_c0_g1_i2	0	0.617	0.732	0.126	0.186	0	0.246	0	0.041	0.932	0.554	6.411	1.057	5.61	1.025	0.722	3.311	1.684	1.757	0.087
TRINITY_DN17225_c0_g1_i1	0	0.468	1.066	0.756	0.055	0.154	0.393	0	0.27	1.08	2.018	16.958	1.461	14.478	0.67	1.987	2.89	2.895	3.571	0
TRINITY_DN17225_c0_g1_i2	0	0	0.713	0.271	0	0	0.364	0	0	1.975	0.314	6.07	0.166	1.481	0.555	0.5	7.199	3.191	2.678	0.161
TRINITY_DN17234_c0_g1_i1	0	0.018	0.287	0.107	0	0.031	0.128	0.035	0.033	0.148	0.073	1.643	0.021	0.984	0.134	0.083	1.479	0.481	0.461	0.037			sp|Q9HFS2|CREA_COCCA	DNA-binding protein creA OS=Cochliobolus
TRINITY_DN17248_c0_g1_i1	0.124	0.15	0.917	0.32	0.208	0	0.226	0.044	0.074	0.397	0.962	2.474	0.777	2.399	0.441	0.25	2.41	0.944	0.547	0
TRINITY_DN17257_c0_g1_i1	0.05	7.612	10.563	2.781	0.58	0.42	3.264	0.132	0.18	12.277	1.914	44.483	9.955	21.884	6.253	3.598	20.364	19.749	22.604	1.414			sp|Q9P975|IF4E_CANAL	Eukaryotic translation initiation factor
TRINITY_DN17262_c0_g1_i1	0	0.115	7.579	2.636	0.12	0.748	1.563	0	0.107	10.338	2.959	23.639	10.152	4.128	6.493	1.639	5.995	6.725	8.792	0.633
TRINITY_DN17263_c0_g1_i1	0.149	3.766	5.652	1.066	0.548	0.205	2.478	0.404	0.205	9.083	0.973	27.295	4.952	15.443	3.984	1.709	17.455	11.646	12.939	0.174			sp|O59948|ERF1_PODAS	Eukaryotic peptide chain release factor
TRINITY_DN17269_c0_g1_i3	0	0.176	1.047	0.94	0	0	1.091	0	0.057	2.317	0.837	12.851	1.233	2.59	1.159	0.347	4.094	1.434	4.492	0.223
TRINITY_DN17279_c0_g1_i1	0	0.6	0.398	0.484	0.208	0	0.216	0	0	0.434	0.146	2.073	0.135	5.17	0.747	0.486	1.939	0.833	0.48	0.149
TRINITY_DN17286_c0_g1_i1	0.099	1.526	3.048	0.727	0.066	0	1.18	0.158	0.172	3.498	0.512	17.439	1.202	8.677	1.532	0.778	13.106	5.689	6.872	0.112			sp|P0CM73|CHS7_CRYNB	Chitin synthase export chaperone OS=Cryptococcus
TRINITY_DN17289_c0_g1_i1	0.199	4.375	9.302	1.618	0.898	0.246	2.409	0.255	0.164	11.141	1.516	31.852	6.651	15.624	5.104	2.209	21.108	14.347	15.098	0.781			sp|Q9UTK0|NOB1_SCHPO	20S-pre-rRNA D-site endonuclease nob1 OS=Schizosaccharomyces
TRINITY_DN17295_c0_g1_i2	0.133	0.468	0.621	0.281	0	0	1.101	0.088	0.467	1.662	1.255	4.097	0	3.603	1.59	0.167	3.174	2.979	0.681	0
TRINITY_DN17303_c0_g1_i1	0.033	1.235	2.214	0.388	0	0.041	1.662	0.158	0.213	2.492	1.276	14.243	1.595	11.563	2.212	0.611	13.419	6.716	7.237	0.124		Serine_Peptidases	sp|Q9P778|DPP5_SCHPO	Dipeptidyl-peptidase 5 OS=Schizosaccharomyces
TRINITY_DN17322_c0_g1_i1	0	0.026	0.241	0.136	0	0	0.236	0	0.025	0.212	0.146	2.604	0.228	2.752	0.239	0.542	2.204	1.008	0.845	0
TRINITY_DN17323_c0_g1_i1	0.05	1.826	3.271	0.727	0.285	0.195	0.934	0.088	0.082	4.597	0.847	16.607	2.611	8.668	2.126	0.972	10.804	7.363	7.208	0.459		Metallo_Peptidases=CAA21804	sp|Q4P2U5|SPT16_USTMA	FACT complex subunit SPT16 OS=Ustilago
TRINITY_DN17326_c0_g1_i1	0	0.044	0.306	0.058	0	0	0.108	0	0	0.194	0.125	1.523	0.062	0.43	0.048	0.097	0.95	0.592	2.179	0.087
TRINITY_DN17334_c0_g1_i3	0	0.159	0	0	0	0	0.039	0	0	0.074	0.282	0.871	0	2.064	0.077	0.5	0.803	0.426	0.413	0			sp|P80209|CATD_BOVIN	Cathepsin D OS=Bos taurus GN=CTSD PE=1 SV=2
TRINITY_DN17354_c0_g1_i1	0.232	5.301	10.081	1.754	1.249	0	3.638	0.229	0.344	11.335	2.248	40.617	3.802	26.28	6.723	3.626	28.092	16.586	19.312	1.476
TRINITY_DN17375_c0_g1_i2	0	2.479	4.345	0.601	0.372	0	2.822	0.088	0.164	7.237	1.182	28.567	3.201	10.034	3.38	1.139	14.732	9.852	13.313	0			sp|Q2IXN5|RL17_RHOP2	50S ribosomal protein L17 OS=Rhodopseudomonas
TRINITY_DN17378_c0_g1_i1	0.033	0.512	0.38	0.184	0.044	0.031	0.206	0.044	0.057	0.655	0.23	3.606	0.28	3.297	0.479	0.389	1.655	0.971	1.046	0.037			sp|Q6NPT7|HRD1B_ARATH	ERAD-associated E3 ubiquitin-protein ligase
TRINITY_DN17391_c0_g1_i1	0	1.464	2.428	0.475	0.164	0.061	0.895	0.079	0	2.474	0.387	10.748	1.502	6.298	1.618	0.472	5.857	4.597	4.3	0.285
TRINITY_DN17405_c0_g1_i1	0	0.476	0.176	0.32	0	0	0.157	0.07	0.131	0.212	1.443	2.174	0.197	2.81	0.364	0.583	0.911	0.805	1.171	0
TRINITY_DN17409_c0_g1_i1	0.836	7.868	19.355	7.509	1.851	1.506	11.376	1.248	1.156	17.252	9.537	111.483	8.743	75.934	12.258	3.792	58.017	38.722	33.393	1.687
TRINITY_DN17410_c0_g1_i1	0	0.318	0.296	0.242	0.022	0	0.324	0.018	0.049	0.397	0.303	2.224	0.259	2.867	0.182	0.194	1.293	0.851	1.017	0.136
TRINITY_DN17412_c0_g1_i2	0	0.512	0.065	0.058	0.022	0	0.138	0	0.049	0.277	0.324	1.422	0.155	3.01	0.23	0.056	0.94	0.629	0.49	0
TRINITY_DN17416_c0_g1_i2	0.058	2.011	3.808	0	0.241	0.123	1.465	0.149	0.074	3.748	1.474	12.801	3.294	7.597	2.94	1.625	9.286	5.504	2.937	0.074
TRINITY_DN17420_c0_g1_i1	0	1.164	1.974	0.242	0.099	0	1.249	0.097	0.32	3.175	2.238	20.914	0.622	16.991	1.934	2.181	16.613	7.28	7.247	0
TRINITY_DN17422_c0_g1_i1	0	0.485	0.686	0.039	0	0	0.187	0	0.033	0.738	0.512	5.79	0.466	3.794	0.479	0.917	3.399	1.351	2.006	0.062
TRINITY_DN17426_c0_g1_i1	0	0	0.213	0	0	0	0	0	0	0.166	0	1.012	0.124	0	0.163	0.333	0.637	0.805	0.547	0
TRINITY_DN17426_c0_g1_i2	0	2.417	19.133	13.449	0.843	1.055	11.641	0	0.344	31.098	5.595	119.857	17.155	15.968	18.53	10.141	38.426	21.525	36.57	4.341
TRINITY_DN17429_c0_g1_i1	0	0.67	1.427	0.698	0.164	0	1.042	0	0	1.865	0.251	11.94	0.425	3.306	0.785	0.486	6.631	5.152	5.769	0
TRINITY_DN17438_c0_g1_i2	1.723	44.439	49.774	10.969	2.486	1.209	21.611	1.679	1.754	50.51	12.057	186.917	39.511	188.382	31.813	17.629	97.746	69.979	83.132	2.456			sp|P83778|MDHC_CANAL	Malate dehydrogenase, cytoplasmic OS=Candida
TRINITY_DN17459_c0_g1_i1	0.215	0.3	2.659	3.353	0.515	0.625	1.435	0.088	0.164	1.098	2.646	21.836	0.653	13.904	3.055	4.682	22.666	4.385	6.402	0.608			sp|P50325|CDA_AMYRO	Chitin deacetylase OS=Amylomyces rouxii PE=1
TRINITY_DN17464_c0_g1_i1	0	0.406	0.528	0.271	0	0.051	0.669	0	0.057	1.098	0.345	7.572	0.352	6.183	0.814	1.236	6.641	2.655	2.995	0.05
TRINITY_DN17471_c0_g1_i1	0	1.403	0.852	0.32	0.361	0	0.944	0.114	0.213	2.031	0.575	10.467	1.885	5.571	0.852	0.347	5.397	3.349	3.782	0.211
TRINITY_DN17479_c0_g1_i1	0	0.221	0.222	0	0	0	0.324	0	0	0.231	0.22	2.865	0.041	2.313	0.651	0.125	2.899	0.259	1.123	0
TRINITY_DN17484_c0_g2_i1	0	0.212	0	0	0	0	0.059	0	0	0.222	0.282	2.354	0	2.638	0.345	0	1.626	0.379	0.777	0
TRINITY_DN17497_c0_g1_i2	0	0.379	0.435	0.068	0	0	0.315	0.062	0	0	0.575	4.137	0.269	4.921	0.287	0.347	1.175	0.833	1.709	0
TRINITY_DN17507_c0_g1_i1	0.05	6.739	7.561	1.56	0.427	0.215	3.481	0.334	0.41	10.052	2.614	41.719	4.164	30.102	6.253	3.015	26.329	17.798	21.635	0.546		Metallo_Peptidases=EAS35154	sp|O61470|PSMD3_ANOGA	Probable 26S proteasome non-ATPase regulatory
TRINITY_DN17508_c0_g1_i1	0.273	8.821	12.879	2.936	1.084	0.666	4.474	0.527	0.361	18.591	2.886	57.004	11.064	29.615	9.596	4.126	37.427	27.113	30.292	1.662			sp|P0CP46|PABP_CRYNJ	Polyadenylate-binding protein, cytoplasmic
TRINITY_DN17510_c0_g1_i1	0.083	4.693	7.403	1.851	0.635	0.328	1.504	0.255	0.279	6.545	1.391	24.46	5.967	22.534	2.969	3.598	13.165	8.205	11.662	1.005			sp|Q9VRV7|SF3B6_DROME	Splicing factor 3B subunit 6-like protein
TRINITY_DN17518_c0_g1_i2	0	8.177	34.588	12.131	8.51	3.74	17.806	0.712	1.737	49.495	11.973	149.506	47.415	36.706	20.149	14.753	47.839	34.245	53.665	6.263
TRINITY_DN17521_c0_g1_i2	0	0.494	1.538	0.465	0.131	0	0.747	0.158	0.033	2.289	0.084	7.532	0.943	1.357	1.379	0.458	7.356	3.478	3.158	0.174			sp|Q7SEY9|ERO1_NEUCR	Endoplasmic reticulum oxidoreductin-1 OS=Neurospora
TRINITY_DN17526_c0_g1_i1	0.224	5.257	8.728	4.292	1.117	0.348	5.044	0.721	0.664	13.144	3.754	61.361	9.147	32.912	8.264	3.32	31.844	23.348	23.314	1.277
TRINITY_DN17536_c0_g1_i1	0.182	4.234	7.727	1.386	0.646	0.051	3.815	0.527	0.328	9.766	2.259	40.897	5.035	23.05	5.909	2.501	33.029	18.76	19.907	0.211			sp|Q6C354|PRPD_YARLI	2-methylcitrate dehydratase, mitochondrial
TRINITY_DN17550_c0_g1_i1	0	3.581	8.737	1.579	1.008	0	2.95	0.343	0.213	9.96	1.569	42.129	6.464	20.718	4.013	1.875	20.707	16.697	22.969	0.174
TRINITY_DN17559_c0_g1_i1	0.108	2.611	4.79	1.308	0.438	0.215	2.586	0.158	0.221	6.683	1.924	27.706	2.921	15.634	4.453	2.028	18.033	12.118	10.568	0.124			sp|P24918|NDUS1_NEUCR	NADH-ubiquinone oxidoreductase 78 kDa subunit,
TRINITY_DN17561_c0_g1_i1	0.05	1.332	2.668	1.24	0.329	0.102	1.514	0.062	0.32	3.074	1.171	15.115	2.787	9.069	2.298	1.278	8.767	4.801	6.556	0.174			sp|Q09759|YA72_SCHPO	Uncharacterized protein C24H6.02c OS=Schizosaccharomyces
TRINITY_DN17582_c0_g1_i1	0.108	2.946	4.336	1.211	0.504	0.656	3.077	0.343	0.254	5.548	1.705	24.47	4.247	18.788	3.802	0.834	15.418	8.584	12.823	0.732			sp|Q9Y7L0|SEC22_SCHPO	Protein transport protein sec22 OS=Schizosaccharomyces
TRINITY_DN17587_c0_g1_i1	0	0.097	0.676	0.107	0	0	0	0	0	0.295	0.251	1.402	0.104	1.94	0.144	0.194	1.185	0.546	1.814	0.087
TRINITY_DN17587_c0_g2_i1	0.207	3.934	4.207	1.318	0.274	0.318	0.796	0.202	0.18	5.372	1.244	19.913	5.004	13.474	2.432	2.139	6.122	6.309	8.418	1.191
TRINITY_DN17590_c0_g1_i1	0.066	1.12	0.769	0	0	0.061	0.718	0.044	0.188	0.923	0.962	8.594	0.218	7.416	0.967	0.917	8.385	3.885	3.369	0.298
TRINITY_DN17596_c0_g1_i3	0	0.67	1.723	0.543	0.033	0.164	1.288	0.062	0.057	2.049	0.899	8.684	1.668	7.779	1.973	0.931	5.025	3.034	3.081	0.174			sp|Q54IV7|RFT1_DICDI	Protein RFT1 homolog OS=Dictyostelium discoideum
TRINITY_DN17598_c0_g1_i1	0	0	0	0.155	0	0	0	0	0	0	0.241	1.743	0.124	0.917	0	0.097	0.803	0	0.643	0
TRINITY_DN17602_c0_g1_i3	0.108	4.552	5.578	0.843	0.285	0	2.33	0.343	0.385	5.345	2.154	22.136	4.807	8.4	2.72	1.25	8.786	6.827	8.677	0.744
TRINITY_DN17606_c0_g1_i1	0	0.097	0.389	0	0	0	0.118	0	0	0.111	0	6.421	0	2.141	0.211	0	6.592	2.923	3.436	0
TRINITY_DN17610_c0_g1_i1	0	6.016	6.486	0.862	0.821	0.092	2.212	0.334	0.361	8.391	1.746	25.262	4.496	17.956	3.888	1.584	16.946	11.951	13.687	0.496
TRINITY_DN17614_c0_g1_i1	0	7.189	3.345	0.562	0.383	0.318	1.76	0.123	0.426	4.006	1.663	18.24	2.776	24.206	2.93	3.32	13.703	7.965	7.189	0.831
TRINITY_DN17617_c0_g1_i1	0	0.256	1.946	1.211	0.208	0.328	0.521	0.141	0.066	1.08	0.763	6.14	0	10.483	1.561	3.153	7.836	1.665	2.668	0.856
TRINITY_DN17629_c0_g1_i1	0.207	2.796	8.932	1.24	2.201	0	4.631	0.527	0.246	13.818	1.15	50.213	5.687	11.19	7.259	1.723	41.482	22.987	21.02	0.595			sp|O94515|TCPZ_SCHPO	T-complex protein 1 subunit zeta OS=Schizosaccharomyces
TRINITY_DN17629_c0_g2_i1	0.828	12.27	16.205	3.992	2.223	0.379	6.106	0.773	0.492	23.252	3.911	79.29	17.093	39.84	9.921	4.89	35.919	27.769	35.264	1.166			sp|O94515|TCPZ_SCHPO	T-complex protein 1 subunit zeta OS=Schizosaccharomyces
TRINITY_DN17632_c0_g1_i1	0	1.12	1.52	0.378	0.164	0.102	0.885	0.097	0.033	2.012	0.617	10.437	1.077	4.998	1.446	0.695	9.668	5.578	5.509	0			sp|P53199|ERG26_YEAST	Sterol-4-alpha-carboxylate 3-dehydrogenase,
TRINITY_DN17649_c0_g1_i1	0	2.452	4.299	3.76	0	0.461	4.513	0	0.41	3.701	9.673	41.258	3.118	61.542	7.01	5.459	24.507	13.33	13.227	0
TRINITY_DN17655_c0_g1_i1	0.108	5.116	3.549	0.988	0.361	0.553	2.989	0.281	0.385	3.646	1.307	24.54	4.227	20.192	4.013	1.403	12.303	7.493	8.821	0.248
TRINITY_DN17661_c0_g1_i1	0.381	3.696	6.263	1.289	0.504	0.471	3.018	0.193	0.41	8.225	2.98	33.074	3.294	25.066	3.926	0.986	25.311	14.366	14.686	0.484			sp|P15700|KCY_YEAST	Uridylate kinase OS=Saccharomyces cerevisiae
TRINITY_DN17665_c0_g1_i3	0	0.961	2.631	0.213	0.131	0.102	0.521	0.193	0.057	2.418	0.554	9.405	0.912	6.603	1.59	0.778	4.261	2.026	3.638	0
TRINITY_DN17665_c0_g1_i4	0	0	0	0	0	0	0	0	0	0.342	0	0.491	0.477	2.236	0	0	0.989	1.203	0	0.211
TRINITY_DN17669_c0_g1_i2	1.176	0	0.908	2.277	0	2.306	0.177	0.413	0	0	0	0	0	0	0	0	0.176	0	0	0
TRINITY_DN17675_c0_g1_i1	0.066	0.494	1.001	0.223	0.088	0	0.265	0	0.115	0.858	0.146	2.103	0.787	2.418	0.795	0.57	1.489	1.249	2.409	0.074
TRINITY_DN17686_c0_g1_i1	0.066	3.034	2.668	0.484	0.504	0	1.966	0.395	0	5.105	0.952	19.492	1.222	10.101	3.582	1.611	20.609	8.427	7.045	0
TRINITY_DN1768_c0_g1_i2	0.505	29.532	22.154	5.232	1.544	1.045	10.186	0.844	1.541	20.963	8.533	99.003	25.94	92.189	14.757	9.627	44.842	31.886	39.651	0.881
TRINITY_DN17692_c0_g1_i2	0	0.759	3.549	0.61	0.164	0.092	1.426	0.035	0.057	5.141	0.638	13.963	2.797	8.84	2.145	1.445	5.652	4.403	7.775	0.112
TRINITY_DN17694_c0_g1_i1	0	2.426	1.232	0.329	0.175	0.133	1.367	0.211	0.238	2.105	0.638	9.676	1.45	10.684	2.461	0	6.181	2.997	3.657	0.459			sp|Q9H2D1|MFTC_HUMAN	Mitochondrial folate transporter/carrier
TRINITY_DN17694_c0_g1_i2	0	0	0	0	0	0	0	0	0	0	0	1.903	0	2.81	0	0.764	2.086	0.638	0.442	0			sp|Q9H2D1|MFTC_HUMAN	Mitochondrial folate transporter/carrier
TRINITY_DN17698_c0_g1_i1	0	0.415	0.852	0	0.077	0	0.58	0.053	0.049	1.098	0.157	4.938	0.508	1.003	1.14	0	5.975	3.108	2.457	0			sp|G0S024|NIC96_CHATD	Nucleoporin NIC96 OS=Chaetomium thermophilum
TRINITY_DN17704_c0_g1_i1	0	0	0.12	0	0	0	0	0	0	0.591	0.125	1.983	0	1.386	0	0.194	0.343	0.111	0.797	0
TRINITY_DN17705_c0_g1_i1	0.141	7.595	4.512	2.451	0.745	0.523	1.74	0.404	0.41	4.865	1.684	26.063	2.952	27.866	4.53	3.64	19.708	9.306	8.091	0.26			sp|P36091|DCW1_YEAST	Mannan endo-1,6-alpha-mannosidase DCW1 OS=Saccharomyces
TRINITY_DN17709_c0_g1_i1	0.05	0.565	0.908	0.417	0.066	0.154	0.315	0.062	0.09	0.923	0.701	4.377	0.663	2.695	1.025	0.125	4.947	2.331	1.996	0			sp|Q2U696|DOT1_ASPOR	Histone-lysine N-methyltransferase, H3 lysine-79
TRINITY_DN1771_c0_g1_i2	0	2.099	0.621	0.591	0.088	0	0	0	0	2.225	0.68	11.208	1.896	6.345	2.289	0	4.506	5.143	5.202	0
TRINITY_DN17725_c0_g1_i1	0	0.988	2.205	0.213	0.372	0.154	1.003	0.035	0.09	3.102	0.167	8.364	1.658	2.332	1.523	0.736	5.436	3.534	4.099	0.112			sp|Q4PHV3|IPI3_USTMA	Pre-rRNA-processing protein IPI3 OS=Ustilago
TRINITY_DN1773_c0_g1_i1	0	0.291	0.389	0.174	0	0	0.167	0	0.049	0.868	0.063	2.484	0.031	1.462	0.306	0.208	0.999	1.082	0.422	0.186
TRINITY_DN17748_c0_g1_i1	0.066	0.6	1.788	0.552	0.088	0.102	0.688	0.167	0.156	1.302	0.889	10.587	0.383	4.769	1.494	0.514	5.818	4.015	3.734	0.099			sp|Q08217|PSK2_YEAST	Serine/threonine-protein kinase PSK2 OS=Saccharomyces
TRINITY_DN17753_c0_g1_i2	0.273	6.748	6.217	1.405	0.668	0.379	3.195	0.642	0.27	6.766	2.468	31.522	4.403	26.184	6.608	2.945	17.533	12.321	10.769	0.521
TRINITY_DN17778_c0_g1_i1	0	0	0	0	0	0	0	0	0	0.295	0	0.26	0.29	0.917	0	0	0.382	0.176	0.653	0			sp|Q5R788|ISCA2_PONAB	Iron-sulfur cluster assembly 2 homolog,
TRINITY_DN17784_c0_g1_i1	0	1.667	1.093	0.669	0.449	0.143	1.082	0	0.156	3.36	0.638	13.182	1.492	6.192	1.532	1.139	4.888	4.468	5.058	0.236			sp|Q05776|UPS1_YEAST	Protein UPS1, mitochondrial OS=Saccharomyces
TRINITY_DN17800_c0_g1_i1	0.05	0.212	0.083	0.068	0	0.051	0.069	0.035	0.033	0.249	0.157	1.573	0.124	1.252	0.192	0.194	0.646	0.352	0.298	0.347
TRINITY_DN17802_c0_g1_i1	0.29	6.228	7.894	0.969	1.106	0.102	3.028	0.466	0.525	8.769	2.656	24.17	6.133	24.837	7.211	3.028	14.702	9.963	11.7	1.005
TRINITY_DN17804_c0_g1_i1	0	0	0	0	0	0	0.177	0.167	0	0.249	0.105	1.182	0.218	1.749	0.163	0.167	0.852	0.453	0.557	0
TRINITY_DN17805_c0_g1_i2	0	0.644	2.455	0.329	0.044	0.133	1.032	0.044	0.197	3.148	0.586	10.888	1.15	7.941	1.858	0.861	9.354	5.707	4.722	0.236			sp|Q09329|MLO2_SCHPO	Protein mlo2 OS=Schizosaccharomyces pombe
TRINITY_DN17806_c0_g2_i1	0	0	0.723	0.058	0	0	0.265	0	0	0.378	0.418	11.669	0.062	4.052	0.144	0.194	8.659	2.091	4.454	0
TRINITY_DN17821_c0_g1_i1	0	0.132	0.102	0	0.022	0.041	0.029	0	0	0.092	0.125	0.871	0.083	0.879	0.182	0	0.529	0.426	0.384	0
TRINITY_DN17839_c0_g1_i1	1.118	20.597	16.4	5.63	1.369	0.287	11.572	1.441	1.385	18.563	7.1	75.494	16.212	76.804	18.664	6.154	41.541	34.476	31.156	0.967			sp|Q08971|YP225_YEAST	Protein PBDC1 homolog OS=Saccharomyces
TRINITY_DN17841_c0_g1_i1	0.058	0.873	0.741	0.407	0	0	0.492	0.035	0.205	0.692	0.973	4.297	0.332	6.747	1.101	0.681	5.015	1.563	1.536	0
TRINITY_DN17844_c0_g1_i1	0	1.508	1.853	0.155	0.11	0.041	0.57	0.079	0.123	2.178	0.857	7.783	1.678	7.024	0.622	0.445	5.613	3.793	5.308	0.05			sp|F2Z699|NDH2_YARLI	External alternative NADH-ubiquinone oxidoreductase,
TRINITY_DN17846_c0_g1_i1	0	1.341	2.14	0.727	0.11	0.297	1.514	0	0.402	2.926	0.91	12.33	1.129	10.837	2.921	1.917	11.068	4.468	4.77	0.062
TRINITY_DN17851_c0_g1_i7	0	0	0	0	0	0	0	0	0	0	0	0.731	0	0.019	0.172	0.139	1.479	0.675	0.336	0			sp|Q4P996|PRM1_USTMA	Plasma membrane fusion protein PRM1 OS=Ustilago
TRINITY_DN17864_c0_g1_i2	0	0.141	0.964	0.184	0	0	0.216	0	0.041	0.378	0.209	5.439	0.3	2.571	0.278	0.695	4.751	2.562	6.901	0.037
TRINITY_DN17897_c0_g1_i1	0	0.335	0.334	0	0	0	0.718	0	0.049	0.305	1.548	3.506	0.104	8.725	0.824	1.278	0	2.618	0.643	0
TRINITY_DN17897_c0_g1_i2	0	0	0.991	0	0	0	0.334	0	0	2.04	1.359	8.564	0.104	4.367	0.077	0.153	10.51	3.191	3.59	0
TRINITY_DN17898_c0_g1_i1	0.124	1.244	1.001	0.048	0.088	0.133	0.305	0.079	0.041	1.689	0.502	5.469	0.456	4.339	0.67	1.292	4.437	2.211	1.67	0.211			sp|P04146|COPIA_DROME	Copia protein OS=Drosophila melanogaster
TRINITY_DN17909_c0_g1_i1	0	0	0	0	0	0	0.157	0	0	0.249	0.084	0.982	0	1.443	0	0	0.784	0.296	0.384	0
TRINITY_DN17913_c0_g1_i1	0	1.164	0.676	0.388	0.099	0	0.708	0.097	0.18	0.978	0.554	7.162	0.704	4.396	1.379	0.194	3.947	3.127	3.081	0.087
TRINITY_DN17914_c0_g1_i1	0	1.588	1.047	0.368	0.12	0.092	0.678	0	0.156	1.551	0.701	5.91	0.912	4.683	0.891	0.347	2.948	2.923	3.043	0.198
TRINITY_DN17917_c0_g1_i1	0	0	0	0	0	0	0	0	0	0.554	0	0.27	0	0.554	0	0	0.225	1.619	0.288	0			sp|B6K4J2|LIPA_SCHJY	Lipoyl synthase, mitochondrial OS=Schizosaccharomyces
TRINITY_DN17917_c0_g1_i2	0.149	3.793	6.208	1.696	0.701	0.236	2.94	0.387	0.311	8.778	1.077	26.614	4.693	14.373	4.319	1.848	16.73	8.381	9.589	0.347			sp|B6K4J2|LIPA_SCHJY	Lipoyl synthase, mitochondrial OS=Schizosaccharomyces
TRINITY_DN17920_c0_g2_i1	0	0.891	1.084	0.087	0.077	0.123	0.492	0.114	0.074	1.625	0.136	8.304	0.539	4.501	1.197	0.389	4.026	2.794	2.803	0			sp|A0A024SH20|GUN2_HYPJR	Endoglucanase EG-II OS=Hypocrea jecorina
TRINITY_DN17922_c0_g1_i1	0	1.341	0.945	0.572	0	0	0.777	0	0.172	1.172	0.533	9.776	1.378	4.386	0.986	0.389	4.907	2.572	2.505	0
TRINITY_DN17927_c0_g1_i1	0	0	0.296	0	0	0	0.659	0	0	0.48	0.45	2.684	0	12.452	0.354	2.32	5.338	2.137	1.065	0
TRINITY_DN17932_c0_g1_i1	0.033	0.291	0.732	0.145	0.066	0.02	0.315	0.026	0.008	0.868	0.293	4.798	0.311	3.354	0.603	0.333	2.948	1.573	1.267	0.074			sp|Q9P7M8|NU184_SCHPO	Nucleoporin nup184 OS=Schizosaccharomyces
TRINITY_DN17941_c0_g1_i1	0.091	7.948	8.886	0.359	0.099	0.092	3.215	0.123	0.475	11.086	5.333	118.164	2.248	77.31	6.273	3.848	74.081	35.771	33.566	0.112
TRINITY_DN17946_c0_g1_i1	0	0.697	1.047	0.417	0.12	0.092	0.708	0.018	0.09	1.791	0.544	9.646	1.388	5.428	1.293	0.264	6.563	3.598	3.254	0.099			sp|P78810|VTC4_SCHPO	Vacuolar transporter chaperone 4 OS=Schizosaccharomyces
TRINITY_DN17966_c0_g1_i2	0	0.626	0.825	0.31	0.044	0.041	0.698	0.044	0.066	0.812	0.209	5.108	0.352	2.341	0.948	0.57	4.623	2.285	1.852	0.087			sp|P38880|MDM31_YEAST	Mitochondrial distribution and morphology
TRINITY_DN17968_c0_g1_i1	0	0.115	0.102	0	0.12	0	0.305	0	0	0.425	0.146	1.222	0.176	1.261	0.115	0	0.666	0.435	0.374	0
TRINITY_DN17969_c0_g1_i1	0	0.097	0.093	0.058	0	0	0.029	0	0.049	0.028	0.157	3.195	0	2.542	0.077	0.32	1.518	0.453	0.633	0
TRINITY_DN17978_c0_g1_i2	0.215	1.42	0.899	0.562	0.066	0.051	0.826	0.07	0.066	1.44	0.471	6.821	0.849	7.148	1.35	0.695	5.524	2.951	2.4	0			sp|Q10351|PIGS_SCHPO	GPI transamidase component PIG-S homolog
TRINITY_DN17988_c0_g1_i1	0.124	2.32	3.576	0.765	0.35	0	1.809	0.079	0.057	5.418	0.91	19.943	3.056	10.197	3.007	0.986	14.144	7.992	8.504	0			sp|Q5R4G6|CUL1_PONAB	Cullin-1 OS=Pongo abelii GN=CUL1 PE=2 SV=1
TRINITY_DN17991_c0_g1_i2	0	0.829	2.418	1.512	0.909	0	2.379	0.07	0	3.102	0.648	24.21	0.715	17.201	3.093	1.764	21.853	11.618	9.042	0.955
TRINITY_DN18004_c0_g1_i1	0.133	2.77	6.634	1.153	0.57	0.133	2.34	0.167	0.156	6.905	1.15	23.509	3.905	15.835	3.4	1.097	14.683	8.51	9.867	0.446			sp|Q9CQK7|RWDD1_MOUSE	RWD domain-containing protein 1 OS=Mus
TRINITY_DN18016_c0_g1_i1	0.075	2.152	3.261	0.388	0.296	0.051	1.435	0.097	0.098	3.498	1.558	18.621	1.73	12.767	2.059	1.959	12.998	7.113	7.189	0.136			sp|G9BIY1|MVD_GANLU	Diphosphomevalonate decarboxylase OS=Ganoderma
TRINITY_DN18022_c0_g1_i1	0	0	1.482	1.163	0.11	0.082	0.924	0.053	0.467	1.625	0.92	11.679	0.808	4.052	1.436	1.5	13.047	5.365	3.177	0.099			sp|P36035|JEN1_YEAST	Carboxylic acid transporter protein homolog
TRINITY_DN18027_c0_g1_i2	0	0	0.426	0.058	0	0	0.285	0	0	0.508	0.167	1.953	0.456	0.65	0.412	0.153	1.048	0.389	1.123	0.136			sp|P0C956|GEL4_ASPFU	1,3-beta-glucanosyltransferase gel4 OS=Neosartorya
TRINITY_DN18047_c0_g1_i2	0	5.901	13.333	5.32	1.61	0.359	4.228	0.149	0.344	19.209	2.123	60.299	17.321	17.975	8.466	3.862	28.347	23.329	28.037	1.984			sp|Q5ACM4|PNO1_CANAL	Pre-rRNA-processing protein PNO1 OS=Candida
TRINITY_DN18048_c0_g1_i1	0.273	4.64	4.03	0.349	0.559	0.072	2.822	0.448	0	5.206	1.725	22.617	2.621	27.044	3.572	2.431	16.485	8.501	8.293	0.161			sp|Q8L4Y2|LPAT4_ARATH	Probable 1-acyl-sn-glycerol-3-phosphate
TRINITY_DN18057_c0_g1_i2	0.364	4.093	3.873	2.025	0.186	0.184	1.249	0.229	0.197	5.935	1.464	22.757	2.797	13.14	3.84	1.625	16.613	10.684	8.082	0.533			sp|O74782|YGBA_SCHPO	Universal stress protein A family protein
TRINITY_DN18066_c0_g1_i1	0	0.344	0.259	0.029	0.099	0.051	0.197	0.088	0.057	0.618	0.45	2.714	0.756	2.093	0.211	0.125	1.773	0.435	0.691	0
TRINITY_DN18068_c0_g1_i1	0.075	6.413	11.721	5	0.405	0.4	5.398	0.439	0.639	9.111	5.093	75.144	4.589	43.71	8.925	5.682	46.889	26.844	35.389	0.62
TRINITY_DN18074_c0_g1_i2	0	0	0.88	0.116	0.11	0	0.56	0	0.098	1.809	0.063	6.521	0.176	1.003	0.709	0	8.727	2.701	3.628	0.186			sp|Q9SEZ7|CIPKG_ARATH	CBL-interacting serine/threonine-protein
TRINITY_DN18085_c0_g1_i2	0	2.408	1.797	0.436	0.296	0	1.023	0.237	0.221	2.742	0.251	12.31	1.865	5.533	1.542	0.167	7.199	5.106	5.932	0
TRINITY_DN18089_c0_g1_i1	0	2.329	3.762	1.24	0.8	0	2.35	0.334	0.254	3.849	0.857	21.415	3.004	11.783	2.557	1.125	12.548	6.457	6.757	0.099			sp|Q10352|YDAA_SCHPO	Uncharacterized protein C1F12.10c OS=Schizosaccharomyces
TRINITY_DN18106_c0_g1_i2	0.207	0.565	0.241	0.591	0	0	0.167	0.044	0.18	0	0.45	5.769	0.29	7.655	0.316	0.722	0.764	0.648	1.008	0			sp|P42824|DNJH2_ALLPO	DnaJ protein homolog 2 OS=Allium porrum
TRINITY_DN18107_c0_g1_i1	0	0.759	1.056	0.329	0.044	0	0.413	0.062	0.074	1.265	0.251	5.279	0.259	2.934	0.871	0.361	3.752	2.294	2.112	0.074			sp|P53933|APP1_YEAST	Phosphatidate phosphatase APP1 OS=Saccharomyces
TRINITY_DN18112_c0_g1_i1	0	3.237	4.318	1.415	0.274	0.215	1.986	0.211	0.148	5.455	1.767	27.896	3.325	18.319	4.223	2.667	16.906	11.211	9.742	0.149			sp|Q10156|LKH1_SCHPO	Dual specificity protein kinase lkh1 OS=Schizosaccharomyces
TRINITY_DN18116_c0_g1_i1	0	0.035	0.093	0	0	0	0.118	0	0	0.138	0.084	0.701	0	0.191	0.144	0.069	1.126	0.435	0.336	0
TRINITY_DN18126_c0_g1_i3	0.248	7.939	11.952	4.07	0.789	0.707	6.745	0.378	0.606	13.966	3.911	56.623	9.469	39.878	9.663	6.112	33.039	19.99	23.362	0.843			sp|P24917|NDUV1_NEUCR	NADH-ubiquinone oxidoreductase 51 kDa subunit,
TRINITY_DN18127_c0_g1_i3	0	0	0	0.039	0	0.061	0.197	0.035	0.033	0.185	0.094	1.342	0.145	0.984	0.038	0.153	0.695	0.564	0.394	0
TRINITY_DN18128_c0_g1_i1	0.066	6.889	1.427	2.209	0	0.082	0	0	0	0.886	1.924	7.833	1.999	30.016	2.069	2.375	3.722	2.442	1.305	0.918			sp|Q09893|YAI5_SCHPO	Uncharacterized protein C24B11.05 OS=Schizosaccharomyces
TRINITY_DN18128_c0_g1_i4	0.232	4.375	4.781	0.223	0.526	0.523	4.002	0.773	0	6.868	1.527	24.59	3.16	17.526	7.824	1.625	16.289	10.74	13.697	0			sp|Q09893|YAI5_SCHPO	Uncharacterized protein C24B11.05 OS=Schizosaccharomyces
TRINITY_DN18131_c0_g2_i1	0.199	4.146	4.383	0.833	0.438	0	2.566	0.457	0.197	6.646	1.15	20.964	3.398	14.057	3.773	1.695	15.28	8.695	10.059	0.831			sp|Q9YGY3|BUB3_XENLA	Mitotic checkpoint protein BUB3 OS=Xenopus
TRINITY_DN18133_c0_g1_i2	0.124	6.968	9.451	0.998	0	0.594	3.422	0.22	0.606	10.689	2.708	38.473	6.381	24.168	4.597	2.834	17.504	16.179	19.293	0.744			sp|P24391|TOM40_NEUCR	Mitochondrial import receptor subunit tom40
TRINITY_DN18141_c0_g1_i1	0	0.335	0.964	0.184	0.175	0.092	0.6	0.053	0	1.182	0.241	5.309	1.108	2.542	0.565	0.445	3.134	2.174	1.92	0.05			sp|Q5RF97|BCD1_PONAB	Box C/D snoRNA protein 1 OS=Pongo abelii
TRINITY_DN18145_c0_g1_i1	0.099	1.773	1.547	0.591	0.197	0.102	0.796	0.123	0.115	2.677	0.826	12.701	0.943	5.046	1.791	0.834	9.031	3.857	3.907	0.112
TRINITY_DN18150_c0_g1_i1	0	0	0.269	0	0	0	0	0	0	0	0.554	5.759	0	7.827	0.105	0.875	3.898	0.925	0.854	0
TRINITY_DN18166_c0_g1_i1	0	1.032	1.056	0.339	0.131	0	0.669	0	0.221	1.44	0.91	10.327	0.332	4.721	0.843	0.972	4.623	4.163	1.651	0
TRINITY_DN18171_c0_g1_i1	0	0.591	3.363	0.979	0.537	0.072	1.435	0.07	0.082	5.621	0.607	20.023	2.362	4.874	2.279	0.681	12.704	9.491	9.166	0.322			sp|O13956|TSR1_SCHPO	Ribosome biogenesis protein tsr1 OS=Schizosaccharomyces
TRINITY_DN18173_c0_g1_i2	0.34	4.702	7.227	2.277	0.504	0.266	2.92	0.167	0.197	6.572	2.165	33.625	3.76	31.125	4.731	3.501	20.364	11.193	13.563	0.298			sp|O43041|TRS23_SCHPO	Transport protein particle subunit trs23
TRINITY_DN18174_c0_g1_i1	0.456	1.588	8.265	12.112	1.336	3.556	4.415	0.29	0.484	1.089	7.341	31.031	4.206	28.592	8.15	15.17	32.696	7.419	9.608	2.617
TRINITY_DN18177_c0_g1_i1	0.257	2.117	1.575	0.669	0.405	0.174	1.475	0.272	0.41	2.215	1.161	13.743	1.523	12.557	2.289	0.556	8.59	5.522	4.972	0.397
TRINITY_DN18188_c0_g1_i1	0	0	0.204	0	0.033	0	0.039	0	0.033	0.092	0.199	2.795	0	1.185	0.163	0	2.801	0.675	0.825	0
TRINITY_DN18202_c0_g1_i1	0.099	2.029	0.815	4.612	0.241	0.84	2.094	0.387	1.319	0.48	4.204	13.342	0.901	30.666	0.709	1.181	47.869	17.927	9.867	0
TRINITY_DN18205_c0_g1_i1	1.093	84.424	136.137	23.052	10.81	1.691	47.223	4.93	2.327	147.349	21.343	458.274	113.156	272.076	79.178	27.909	228.393	162.611	228.221	8.719			sp|O74892|RS2_SCHPO	40S ribosomal protein S2 OS=Schizosaccharomyces
TRINITY_DN18207_c0_g1_i1	0	0.52	0.547	0.32	0	0.174	0.246	0	0	0.905	0.366	3.987	0.601	2.618	0.622	0.528	2.37	1.175	1.392	0.198
TRINITY_DN18208_c0_g1_i1	0	0.203	0.158	0.058	0	0	0.069	0	0	0.157	0.178	1.382	0.073	0.975	0.134	0.097	1.459	0.879	0.989	0.087
TRINITY_DN18214_c0_g1_i1	0	6.21	10.331	2.946	0.745	0.328	4.828	0.308	0.287	9.175	2.29	40.847	6.506	35.196	6.704	2.431	21.99	15.615	15.012	0.546
TRINITY_DN18215_c0_g1_i1	0.199	7.78	15.807	4.011	0.997	0	5.791	0.571	0.41	15.692	3.723	52.336	12.255	33.39	8.197	6.265	26.927	19.62	25.234	1.029			sp|Q9UT87|IMG1_SCHPO	54S ribosomal protein subunit img1, mitochondrial
TRINITY_DN18226_c0_g1_i2	0	0	0	0	0	0	0.108	0	0	0.36	0.491	0.331	0.57	0.592	0	0	0.245	0.12	0.662	0			sp|P40383|XRN1_SCHPO	5'-3' exoribonuclease 1 OS=Schizosaccharomyces
TRINITY_DN18226_c0_g1_i3	0	1.791	1.584	0.291	0.186	0.031	0.836	0.149	0.164	2.723	0	9.946	0.86	5.81	1.551	0.75	6.259	4.431	4.185	0.31			sp|P40383|XRN1_SCHPO	5'-3' exoribonuclease 1 OS=Schizosaccharomyces
TRINITY_DN18236_c0_g1_i1	0	0.115	0.046	0	0	0	0.128	0	0.033	0.12	0.293	1.442	0	3.842	0.192	0.472	1.117	0.611	1.008	0			sp|P80324|OXDA_RHOTO	D-amino-acid oxidase OS=Rhodosporidium toruloides
TRINITY_DN18254_c0_g1_i1	0	2.726	2.252	0.911	0.329	0.379	2.124	0.193	0.402	4.458	0.889	13.883	2.165	10.904	2.471	1.278	12.293	6.845	6.383	0		Cysteine_Peptidases=EFP83420	sp|O13974|OTU1_SCHPO	Putative ubiquitin thioesterase otu1 OS=Schizosaccharomyces
TRINITY_DN18261_c0_g1_i2	0	1.685	2.613	2.2	0.482	0.328	1.514	0.053	0.287	2.151	3.116	21.636	2.279	12.079	1.877	4.251	25.115	5.818	8.149	0.459
TRINITY_DN18270_c0_g1_i1	0	0.547	0.769	0.203	0.164	0.143	0.767	0.149	0.057	1.126	0.157	7.252	0.684	2.274	0.996	0.056	4.006	2.877	2.563	0.05			sp|Q874C0|PEX3_YARLI	Peroxisomal biogenesis factor 3 OS=Yarrowia
TRINITY_DN18276_c0_g1_i1	0	6.845	10.526	1.366	0.887	0.246	4.552	0.545	0.434	13.191	1.694	45.044	9.085	28.822	8.877	4.098	22.852	14.023	17.469	0.695			sp|O14104|LYS12_SCHPO	Homoisocitrate dehydrogenase OS=Schizosaccharomyces
TRINITY_DN18287_c0_g1_i1	0.381	0.062	0.834	0.349	0.077	0	1.337	0	0	0.378	1.527	25.392	0.238	30.303	0.555	2.626	30.522	4.708	6.604	0
TRINITY_DN18294_c0_g1_i2	0.53	0.282	3.521	5.184	0.624	0.83	1.701	0.044	0.115	0.545	2.823	15.926	0.58	9.795	3.428	3.64	21.118	3.302	4.041	1.848
TRINITY_DN18302_c0_g1_i1	0	0	0	0	0.055	0	0	0	0	0.905	0	1.142	0	1.491	0.46	0	2.988	1.702	1.113	0			sp|P22579|SIN3_YEAST	Transcriptional regulatory protein SIN3
TRINITY_DN18311_c0_g1_i1	0	0.053	0	0.029	0	0	0	0	0	0.148	0.199	0.911	0.031	0.927	0.105	0.111	1.763	0.259	0.422	0.05
TRINITY_DN18314_c0_g1_i1	0	0	0	0	0	0	0	0	0	0	0	5.94	0	7.96	1.8	0	6.2	3.025	1.238	0			sp|P37552|RIDA_BACSU	2-iminobutanoate/2-iminopropanoate deaminase
TRINITY_DN18314_c0_g1_i3	0.745	17.077	24.248	4.389	2.344	0.769	9.724	1.151	0.352	25.2	5.019	84.649	19.745	53.467	14.901	7.363	41.473	33.098	44.124	1.116			sp|P37552|RIDA_BACSU	2-iminobutanoate/2-iminopropanoate deaminase
TRINITY_DN18321_c0_g1_i2	0	0.026	0.204	0	0	0	0.049	0	0.033	0.24	0.115	2.123	0	2.408	0.124	0.194	1.695	0.592	0.633	0
TRINITY_DN18337_c0_g2_i2	0	1.561	1.093	0.359	0.099	0.102	0.57	0.062	0.148	1.957	0.241	7.092	1.316	8.467	0.766	0.597	3.693	2.923	2.966	0.062			sp|O60076|TAF13_SCHPO	Transcription initiation factor TFIID subunit
TRINITY_DN18339_c0_g1_i2	0.149	9.571	5.911	1.851	0.329	0.553	1.642	0.475	0.803	4.108	3.942	25.262	4.382	33.82	5.411	3.709	24.468	12.266	11.691	0
TRINITY_DN18339_c0_g1_i3	0	0.917	1.167	0.533	0	0	1.327	0.026	0	1.375	1.652	16.277	1.285	29.596	1.456	5.251	13.782	5.069	5.308	0.533
TRINITY_DN18354_c0_g1_i3	0	0	0	0.029	0	0	0	0	0	0.24	0	1.603	0	0	0	0	0.94	0.703	0.451	0			sp|Q12001|ALG6_YEAST	Dolichyl pyrophosphate Man9GlcNAc2 alpha-1,3-glucosyltransferase
TRINITY_DN18356_c0_g1_i1	0	0.018	0.028	0.048	0	0	0.069	0	0.016	0.12	0.105	1.022	0.052	0.784	0.124	0.042	0.705	0.416	0.278	0
TRINITY_DN18399_c0_g1_i1	0.257	8.08	7.931	1.124	0.723	0.133	4.169	0.554	0.508	11.363	2.133	37.892	6.775	31.679	5.698	3.876	22.294	15.004	14.993	0.843			sp|Q870W0|SC61A_NEUCR	Protein transport protein SEC61 subunit
TRINITY_DN18406_c0_g1_i2	0.141	0.415	0.769	0.3	0	0	1.858	0	0.41	1.062	2.782	31.732	0.425	37.308	0.977	6.779	33.793	5.615	7.314	0
TRINITY_DN1845_c0_g1_i1	0	1.782	0.973	0.872	0	0	1.239	0.343	0	3.6	0.701	8.604	2.559	6.479	1.006	0.667	2.841	2.368	3.34	0.198
TRINITY_DN18482_c0_g1_i1	0.422	10.656	26.138	3.556	1.61	0.215	9.252	0.677	0.713	23.354	5.877	110.472	10.846	62.775	12.89	7.807	68.899	37.251	40.745	0.893			sp|P27800|ALDX_SPOSA	Aldehyde reductase 1 OS=Sporidiobolus salmonicolor
TRINITY_DN18491_c0_g1_i1	0	0	0.408	0.184	0.055	0.041	0.088	0	0	0.637	0.073	1.593	0.124	0.277	0.536	0.167	1.107	0.453	0.989	0.05
TRINITY_DN18492_c0_g1_i2	0.017	0.591	0.482	0.116	0.088	0.02	0.256	0.053	0.074	0.637	0.136	4.107	0	2.905	0.479	0.292	2.312	0.731	1.085	0			sp|Q9Y2L5|TPPC8_HUMAN	Trafficking protein particle complex subunit
TRINITY_DN18494_c0_g1_i1	0.141	5.425	2.974	0.95	0.613	0.051	1.858	0.343	0.229	3.895	1.955	16.707	2.818	18.702	3.448	1.07	10.863	7.631	7.42	0.161		Metallo_Peptidases=EFP90227	sp|Q8RX88|FACE1_ARATH	CAAX prenyl protease 1 homolog OS=Arabidopsis
TRINITY_DN18554_c0_g1_i1	0	0.3	0.296	0.262	0	0	0.344	0.035	0.074	0.498	0.241	4.487	0.186	2.236	0.354	0.236	2.361	2.044	1.593	0
TRINITY_DN18556_c0_g1_i1	0.149	5.936	8.728	1.831	0.734	0.072	3.156	0.378	0.303	7.625	2.008	34.086	5.49	24.044	5.277	3.89	21.275	12.469	13.179	0.322
TRINITY_DN18556_c0_g1_i2	0	0	0	0.126	0	0	0.462	0	0	0.295	0.146	2.144	1.026	0.755	0.239	0	0.451	0.518	0.49	0.248
TRINITY_DN18562_c0_g1_i1	0.331	2.893	3.298	0.388	0.11	0.061	1.809	0.07	0.262	3.618	1.276	14.874	2.124	13.35	2.471	1.292	7.18	6.42	8.226	0.384			sp|P0CO06|HAT1_CRYNJ	Histone acetyltransferase type B catalytic
TRINITY_DN18576_c0_g1_i2	0.041	0.829	3.234	0.707	0.394	0.082	0.787	0.026	0.098	2.271	0.429	12.991	1.606	2.762	0.737	0.542	7.483	5.772	5.73	0.198			sp|O74828|ESF1_SCHPO	Pre-rRNA-processing protein esf1 OS=Schizosaccharomyces
TRINITY_DN18585_c0_g1_i1	0	0.256	0.621	0	0	0.031	0.108	0	0.049	0.988	1.067	9.235	0.414	6.699	0.393	0.236	5.505	1.98	2.112	0			sp|O60176|YG41_SCHPO	Uncharacterized RNA-binding protein C23E6.01c
TRINITY_DN18596_c0_g1_i3	0	0	0.278	0	0	0	0.236	0.193	0	2.188	0	2.504	0.414	1.777	0.594	0	2.37	2.322	1.574	0.682			sp|P47176|BCA2_YEAST	Branched-chain-amino-acid aminotransferase,
TRINITY_DN18603_c0_g1_i1	0	0.15	0.908	0.165	0	0	0.344	0	0	0.84	0.188	2.975	0.383	2.733	0.46	0	3.497	1.795	3.532	0.149
TRINITY_DN18613_c0_g1_i2	0	0.529	1.038	0.475	0.11	0	0.482	0	0.107	1.828	0.408	7.362	1.481	4.109	1.379	0	4.339	3.663	3.695	0.186
TRINITY_DN1861_c0_g1_i1	0	0.088	0.12	0.107	0	0	0.108	0.026	0	0.092	0	1.963	0	0	0.373	0.194	2.194	1.462	0.384	0
TRINITY_DN1861_c0_g1_i2	0	0.291	1.39	0.136	0	0	0.295	0	0.033	1.311	0.91	11.168	0.352	6.718	0.239	0.778	5.054	1.536	2.985	0
TRINITY_DN18623_c0_g1_i1	0.05	0.662	0.676	0.107	0.066	0.102	0.737	0	0.09	1.098	0.157	6.481	0.601	3.478	0.948	0.653	4.702	2.118	1.9	0
TRINITY_DN18628_c0_g1_i2	0	7.321	8.098	2.597	1.019	0.564	4.651	0.246	0.385	8.677	5.155	51.274	6.516	32.644	9.05	2.82	24.684	17.317	20.876	0.757			sp|Q39236|T2AG_ARATH	Transcription initiation factor IIA subunit
TRINITY_DN18657_c0_g1_i2	0	1.05	0.287	0.455	0.11	0	2.9	0.413	0.754	1.015	6.107	64.406	1.16	96.222	1.475	9.544	59.633	12.553	13.639	0
TRINITY_DN18672_c0_g1_i1	0.017	0.573	0.649	0.174	0.022	0.041	0.315	0.053	0.025	0.766	0.178	3.255	0.445	2.16	0.383	0.139	3.095	1.545	1.411	0			sp|Q9Y7J8|YGL1_SCHPO	Uncharacterized protein C216.01c OS=Schizosaccharomyces
TRINITY_DN18673_c0_g1_i2	0.141	1.861	2.242	0.446	0.099	0	1.082	0.132	0	1.938	0.732	15.536	2.144	9.289	1.954	1.278	7.748	5.754	5.548	0.248			sp|P0CR14|CWC2_CRYNJ	Pre-mRNA-splicing factor CWC2 OS=Cryptococcus
TRINITY_DN18698_c0_g1_i1	0.224	9.5	27.305	4.845	2.344	1.26	7.62	1.002	0.328	24.692	6.776	84.89	20.315	54.031	10.592	11.072	52.061	34.596	44.201	1.922			sp|Q6C9W0|UBC12_YARLI	NEDD8-conjugating enzyme UBC12 OS=Yarrowia
TRINITY_DN18739_c0_g1_i1	0	0.935	0.473	0.155	0.285	0.051	0.374	0.141	0.033	0.84	0.251	2.604	1.761	2.188	0.268	0.139	2.204	0.564	0.643	0.124
TRINITY_DN18755_c0_g1_i1	0	0.265	0.361	0	0	0	0.413	0	0.09	0.554	0.178	4.157	0.29	2.035	0.747	0.097	3.007	1.314	1.536	0
TRINITY_DN18758_c0_g1_i2	0	0	0.602	0	0	0	0	0	0	1.172	0.303	5.99	0.539	2.504	0.479	0	2.684	1.221	2.64	0			sp|P33288|RAD18_NEUCR	Postreplication repair E3 ubiquitin-protein
TRINITY_DN18770_c0_g1_i1	1.342	108.92	142.271	23.003	9.803	2.869	50.478	5.897	3.803	166.29	25.766	623.706	113.964	346.854	85.738	41.856	269.013	212.803	312.811	11.249			sp|Q9C3Z6|RLA0_PODAS	60S acidic ribosomal protein P0 OS=Podospora
TRINITY_DN18770_c0_g1_i2	0	0.15	0.76	0.213	0	0	0	0	0	1.126	0.481	3.055	1.554	3.182	0.603	0.361	0.284	1.129	0.355	0			sp|Q9C3Z6|RLA0_PODAS	60S acidic ribosomal protein P0 OS=Podospora
TRINITY_DN18787_c0_g1_i1	0	1.985	4.837	1.386	0.219	0	2.645	0.088	0.713	4.8	1.966	34.867	1.129	22.113	5.171	2.125	30.913	11.72	9.973	0.099
TRINITY_DN18799_c0_g1_i1	0	0	0	0	0	0	0.157	0	0.066	0	0.722	3.175	0	3.622	0.287	0.861	1.998	1.138	1.161	0
TRINITY_DN187_c0_g1_i1	0.116	0.917	0.741	0.126	0.153	0	0.531	0	0	0.508	0.376	7.522	0.425	8.897	0.814	0.903	6.044	0.944	1.92	0			sp|P17576|CARP_IRPLA	Polyporopepsin OS=Irpex lacteus PE=1 SV=1
TRINITY_DN18800_c0_g1_i3	0.19	9.465	7.209	1.434	0.58	0.297	3.048	0.246	0.344	6.821	5.229	48.82	5.408	48.049	4.827	4.598	22.529	14.671	17.738	0.335		Serine_Peptidases	sp|P93732|PIP_ARATH	Proline iminopeptidase OS=Arabidopsis thaliana
TRINITY_DN18801_c0_g1_i1	0	0.961	1.584	0	0	0	0.846	0	0.361	2.594	7.383	28.216	0.601	53.467	1.408	9.155	19.267	8.853	5.73	0
TRINITY_DN18807_c0_g1_i2	0.29	5.839	32.448	5.572	2.902	0	10.963	0.633	0.393	39.812	2.363	108.238	19.652	30.093	16.72	3.042	73.258	55.317	67.342	2.146			sp|P38674|ILV5_NEUCR	Ketol-acid reductoisomerase, mitochondrial
TRINITY_DN18848_c0_g1_i2	0.099	1.403	1.056	0.242	0	0	0.344	0.062	0.164	0.868	0.052	6.27	0.394	4.778	0.393	0.736	5.642	3.034	4.204	0.174
TRINITY_DN18851_c0_g1_i1	0	2.629	2.511	0.543	0.11	0.061	0.924	0.141	0.229	2.132	1.276	10.277	1.243	8.352	1.13	1.25	6.543	4.283	4.425	0.124			sp|P78723|PEX14_PICAN	Peroxisomal membrane protein PER10 OS=Pichia
TRINITY_DN18855_c0_g1_i2	0	0.741	0.491	0.281	0.033	0	0.521	0.088	0.049	1.237	0.627	3.456	0	4.405	0.996	0.625	2.302	1.61	1.593	0
TRINITY_DN18873_c0_g1_i2	0	0.247	0.12	0.213	0	0	0.728	0	0.18	0.831	1.046	14.133	0.135	21.769	0.709	3.251	17.582	3.284	2.784	0.112
TRINITY_DN18938_c0_g1_i1	0.248	4.013	8.747	1.909	0.909	0.256	3.628	0.316	0.295	13.486	1.767	45.916	7.034	14.793	5.066	2.237	20.315	18.593	20.809	0.781			sp|O59678|RRS1_SCHPO	Ribosome biogenesis regulatory protein homolog
TRINITY_DN18961_c0_g1_i1	0	0	0	0	0	0	0.079	0	0.033	0.185	0.471	2.604	0	1.539	0.259	0.389	0.813	0.786	0.614	0
TRINITY_DN18966_c0_g1_i1	0	0	0	0	0	0	0	0	0	0.102	0.293	0.861	0	3.526	0.201	0	1.028	0.694	0.422	0
TRINITY_DN18966_c0_g1_i2	0.083	9.579	9.46	0.058	0	0	18.347	0	2.024	18.738	62.544	210.436	3.429	526.616	7.68	57.387	207.921	77.434	53.924	0
TRINITY_DN18971_c0_g1_i1	0	0.115	0.63	0.3	0.164	0.123	0.855	0	0	1.68	0.094	10.117	0.373	5.963	1.542	0.472	11.176	2.673	4.262	0.074
TRINITY_DN18975_c0_g1_i2	0	1.429	2.001	0.533	0.131	0	0.806	0.132	0.164	1.135	0.805	10.648	1.026	7.033	1.417	0.792	5.74	3.09	2.956	0.074
TRINITY_DN18984_c0_g1_i1	0.116	1.244	4.577	3.517	0.767	0.359	1.996	0.22	0.27	9.138	1.893	15.265	9.085	9.356	5.401	2.514	3.82	2.942	3.187	1.848
TRINITY_DN18988_c0_g1_i1	0	0.635	1.668	0.194	0.044	0	0.787	0.044	0.082	1.237	0.554	8.203	0.414	5.399	1.111	0.903	3.918	3.608	3.436	0
TRINITY_DN18993_c0_g1_i2	0.05	0.635	0.917	0.097	0.099	0	1.17	0.062	0.082	1.135	0.23	8.364	0.559	5.151	0.843	0.681	5.838	3.145	2.486	0.112			sp|O94601|YC8E_SCHPO	Uncharacterized protein C622.14 OS=Schizosaccharomyces
TRINITY_DN18995_c0_g1_i1	0	3.043	2.965	0.61	0.175	0.072	0.885	0.044	0.156	2.908	0.952	10.587	1.658	9.719	1.513	0.681	6.778	4.819	5.605	0.223
TRINITY_DN19003_c0_g1_i1	0.075	0.494	0.148	0.116	0.011	0.061	0.157	0.026	0.131	0.462	0.146	1.933	0.124	2.504	0.259	0.111	1.469	0.786	0.72	0.012			sp|Q9URY1|PPK16_SCHPO	Serine/threonine-protein kinase ppk16 OS=Schizosaccharomyces
TRINITY_DN19027_c0_g1_i1	0.248	5.848	6.634	1.502	0.58	0.256	2.812	0.325	0.443	7.145	1.391	25.292	5.594	25.467	3.017	1.125	11.676	9.195	11.979	0.422			sp|O14280|YETB_SCHPO	Uncharacterized bolA-like protein C8C9.11
TRINITY_DN19029_c0_g2_i1	0	0	0	0	0	0	0	0	0	0.065	0	0.671	0	1.663	0	0	0.421	0.278	0.259	0
TRINITY_DN19035_c0_g1_i1	0.124	1.006	1.899	0.339	0.416	0.123	2.163	0.132	0.221	3.102	1.129	16.026	1.253	10.521	2.528	1.125	12.342	6.919	4.521	0.36
TRINITY_DN19038_c0_g1_i2	0.166	2.743	3.688	0.756	0.548	0	1.917	0.053	0.049	2.483	0.993	18.651	2.03	15.94	3.773	0.528	8.345	7.604	7.496	0.285
TRINITY_DN19061_c0_g1_i2	0	1.341	0.778	0.165	0	0	0.718	0.105	0.238	1.578	0	19.081	0.135	13.78	1.255	0.82	12.175	3.922	2.947	0
TRINITY_DN19068_c0_g1_i1	0.306	8.653	7.598	1.046	0.624	0.533	2.645	0.334	0.213	11.354	1.914	20.844	8.277	24.158	5.439	3.376	17.083	13.764	12.19	2.034			sp|P0CR88|TIM22_CRYNJ	Mitochondrial import inner membrane translocase
TRINITY_DN19110_c0_g1_i1	0.505	6.175	10.609	2.18	0.942	0.256	5.083	0.624	0.279	12.221	2.761	31.822	7.345	22.906	7.364	4.07	23.724	18.057	21.721	0.285
TRINITY_DN19133_c0_g1_i1	0	0	0	0	0	0	0	0	0	0.295	0	4.147	0.787	1.089	0	0	3.605	2.599	2.601	0
TRINITY_DN19133_c0_g1_i2	0	0.097	1.547	0.862	0.077	0	0.619	0	0.033	1.44	0.439	13.773	0.197	2.532	1.12	0.431	3.967	2.72	8.111	0.384
TRINITY_DN19140_c0_g1_i2	0	0.053	0.269	0	0	0	0.177	0	0.074	0.545	0.962	3.426	0	6.556	0.22	1.556	3.144	1.277	0.739	0
TRINITY_DN19144_c0_g1_i1	0	0.353	0.51	0.145	0.033	0	0.295	0.132	0.156	0.397	0.805	5.599	0.414	7.139	0.603	0.417	5.613	2.516	1.929	0
TRINITY_DN19151_c0_g1_i1	0.638	0.582	5.782	7.994	1.621	0.492	1.829	0.211	0.754	0.729	5.072	25.071	2.238	29.118	3.735	7.668	26.633	4.153	7.074	1.29
TRINITY_DN19165_c0_g1_i1	0.033	1.111	0.574	0	0.186	0.061	0.551	0.044	0	1.994	0.376	6.19	1.295	3.048	1.465	0.75	3.703	3.043	1.152	0.223
TRINITY_DN19171_c0_g1_i2	0.041	1.588	1.575	0.407	0.263	0.041	0.57	0.053	0.09	2.575	0.251	7.442	1.367	4.759	1.369	1.111	4.29	2.969	3.292	0.136
TRINITY_DN19175_c0_g1_i2	0	0.159	0.167	0	0	0	0.177	0	0	0.065	0.084	2.714	0	2.857	0.192	0	2.165	0.74	0.701	0
TRINITY_DN19191_c0_g1_i1	0.629	28.412	36.45	7.597	3.45	1.301	16.488	1.793	1.287	44.741	11.597	158.621	30.446	110.537	25.837	14.67	88.685	64.391	70.654	2.257			sp|Q9Y7R8|MDHM_SCHPO	Malate dehydrogenase, mitochondrial OS=Schizosaccharomyces
TRINITY_DN19195_c0_g1_i3	0.133	0.909	0.102	0.504	0	0.061	0.669	0.079	0	1.606	0.565	6.35	0.197	7.072	1.398	1.167	5.505	2.303	2.332	0
TRINITY_DN19208_c0_g1_i1	0.215	2.135	1.26	0.155	0.033	0.113	0.836	0.211	0.164	1.468	0.784	7.733	0.684	6.814	1.235	1.056	6.573	3.45	3.1	0.062			sp|Q23571|ODB2_CAEEL	Lipoamide acyltransferase component of branched-chain
TRINITY_DN19209_c0_g1_i2	0.207	2.355	3.817	1.046	0.23	0.215	1.337	0.185	0.082	2.169	0.962	16.697	3.812	10.216	2.308	0.181	7.65	5.282	6.383	0.248			sp|P35249|RFC4_HUMAN	Replication factor C subunit 4 OS=Homo sapiens
TRINITY_DN19209_c0_g1_i3	0	0	0	0.194	0	0	0	0	0	0.415	0	1.212	0	1.787	0.393	0	0.784	0.25	0.586	0			sp|Q93ZX1|RFC4_ARATH	Replication factor C subunit 4 OS=Arabidopsis
TRINITY_DN19218_c0_g1_i3	0.174	5.672	12.86	4.244	0.942	0.451	5.27	0.149	0.557	11.243	2.29	56.513	5.739	19.609	8.456	5.154	33.891	21.988	24.034	0.905			sp|P0CR54|SNF7_CRYNJ	Vacuolar-sorting protein SNF7 OS=Cryptococcus
TRINITY_DN19224_c0_g1_i1	0	0.838	2.029	0.61	0.274	0.061	0.688	0.07	0	4.08	0.136	10.347	1.896	4.855	1.207	0.528	4.682	4.81	3.983	0.198			sp|Q12504|RKM4_YEAST	Ribosomal lysine N-methyltransferase 4 OS=Saccharomyces
TRINITY_DN19227_c0_g1_i1	0	0.168	0	0.078	0	0	0.197	0	0.197	0.508	0.491	9.295	0.073	7.836	0.565	0.5	6.7	3.191	2.448	0
TRINITY_DN19233_c0_g1_i2	0	0	0.037	0.068	0	0	0.029	0	0	0.092	0	0.21	0	1.357	0.057	0.056	1.009	0.037	0.154	0
TRINITY_DN19241_c0_g1_i1	0.099	0.891	2.177	1.066	0.088	0.031	0.551	0.062	0.123	1.818	0.878	11.369	0.58	8.323	1.197	0.722	8.522	5.411	4.953	0.161			sp|Q09925|LCB2_SCHPO	Serine palmitoyltransferase 2 OS=Schizosaccharomyces
TRINITY_DN19249_c0_g1_i1	0	1.535	0.547	0.349	0.044	0	0.56	0	0.107	1.043	0.293	3.967	0.86	6.9	0.469	1.361	1.616	1.619	2.409	0.211
TRINITY_DN19260_c0_g1_i1	0	0.132	0.491	0.785	0.077	0.061	0.354	0.035	0.098	0.037	0.669	3.626	0.093	3.631	0.421	1.528	5.231	0.833	0.873	0.322
TRINITY_DN19264_c0_g1_i1	0	0.512	0	0.116	0	0	0.177	0	0.049	0.323	0.544	4.177	0.704	3.775	0.105	0	1.303	0.666	1.325	0
TRINITY_DN19271_c0_g1_i1	0	0.397	0.658	0.174	0.033	0.041	0.285	0.026	0	1.034	0.46	3.265	0.373	3.584	0.575	0.486	2.723	1.369	1.248	0.05
TRINITY_DN19279_c0_g1_i1	0	0.035	0	0	0	0	0	0	0	0.305	0.251	2.504	0	2.752	0.172	0.139	1.861	0.638	0	0
TRINITY_DN19292_c0_g1_i1	0.083	4.058	4.225	0.698	0.241	0.041	1.839	0.123	0.188	5.317	1.537	28.387	3.046	21.435	3.61	2.362	17.024	11.193	12.468	0.136			sp|Q92372|RFA1_SCHPO	Replication factor A protein 1 OS=Schizosaccharomyces
TRINITY_DN19296_c0_g2_i1	0	3.643	6.838	1.056	0.635	0.543	2.615	0.141	0	8.945	1.945	26.333	7.003	10.808	2.969	4.237	8.678	10.906	14.599	1.339
TRINITY_DN19303_c0_g1_i1	0	0.52	0.954	0.446	0.033	0.061	0.324	0.035	0.066	0.997	0.366	8.334	0.642	2.924	0.546	0.445	4.261	2.414	5.961	0
TRINITY_DN19330_c0_g1_i1	0.041	0.573	0.852	0.504	0.022	0	0.393	0	0.025	0.969	0.282	4.808	0.549	3.488	0.757	0.306	3.066	1.767	1.507	0
TRINITY_DN19358_c0_g1_i1	0	0	0.222	0.097	0	0.379	0.197	0	0	0.646	0.209	1.412	1.191	1.72	0.086	0	1.009	1.341	0.787	0
TRINITY_DN19358_c0_g1_i2	0.166	5.989	8.469	1.521	1.577	0.236	3.726	0.22	0.606	9.009	4.653	41.468	7.334	37.002	6.004	4.098	34.067	15.328	12.305	0.384
TRINITY_DN19386_c0_g1_i1	0.497	5.469	10.526	1.705	0	0	3.461	0.325	0.672	9.231	3.127	48.149	5.439	32.176	4.338	3.723	29.562	15.485	22.211	0.434
TRINITY_DN19397_c0_g1_i1	0	4.702	4.577	1.046	1.051	0.287	2.674	0.413	0.107	7.237	2.918	33.525	3.398	22.925	5.363	1.084	20.207	11.859	12.967	0.322			sp|O13770|YE98_SCHPO	Uncharacterized membrane protein C17A5.08
TRINITY_DN19413_c0_g2_i2	0.058	3.617	8.005	1.686	0.909	0.297	2.635	0.255	0.066	9.277	0.91	25.061	6.133	13.169	3.438	1.917	15.192	11.35	14.599	0.781			sp|Q4P112|RUVB1_USTMA	RuvB-like helicase 1 OS=Ustilago maydis
TRINITY_DN19436_c0_g1_i1	0.091	2.699	5.68	0.649	0.241	0.287	1.73	0.176	0.213	5.428	1.244	16.557	4.662	8.916	2.557	0.945	8.992	10.101	9.339	0.521
TRINITY_DN19452_c0_g1_i2	0.248	1.87	2.928	0.543	0.252	0	1.524	0.246	0.074	2.917	0.544	15.976	2.248	9.614	2.509	1.139	8.727	5.319	6.277	0
TRINITY_DN19491_c0_g1_i3	0.083	3.325	3.261	1.298	0.591	0.348	1.357	0	0.107	3.434	1.799	19.492	3.346	13.513	2.011	1.528	8.933	6.198	7.64	0.186			sp|Q9SRQ3|PE191_ARATH	Peroxisome biogenesis protein 19-1 OS=Arabidopsis
TRINITY_DN19511_c0_g1_i2	0	6.766	6.541	1.211	1.249	0.195	3.854	0	0.336	10.071	4.978	43.592	5.439	37.145	5.056	3.834	29.052	16.086	18.755	1.414
TRINITY_DN19518_c0_g1_i2	0.075	1.614	13.036	4.777	0.57	0.564	2.999	0.299	0.09	9.591	3.472	38.734	5.501	18.616	7.69	4.515	28.22	15.522	17.277	1.253
TRINITY_DN19526_c0_g1_i1	0	0.829	0.658	0.397	0	0.287	0.501	0	0	1.662	0.167	6.591	0.611	4.348	1.063	0.778	3.81	2.979	2.899	0.633
TRINITY_DN19526_c0_g1_i2	0.108	2.24	5.189	1.657	0.208	0	2.045	0.202	0.443	3.794	1.621	17.479	2.745	14.029	2.164	2	9.991	6.743	8.255	0			sp|P36145|T2EB_YEAST	Transcription initiation factor IIE subunit
TRINITY_DN19526_c0_g1_i3	0	0.123	0	0	0	0	0	0	0	0.138	0.669	1.352	0	0.917	0	0	0.274	0.213	0.71	0
TRINITY_DN19546_c0_g1_i1	0	0.573	0.584	0.281	0.077	0	0.531	0	0.016	1.108	0.471	5.379	0.373	3.622	0.632	0.667	4.085	1.869	2.102	0.037			sp|O75011|NAK1_SCHPO	Serine/threonine-protein kinase nak1 OS=Schizosaccharomyces
TRINITY_DN19550_c0_g1_i2	0	0.185	0.037	0	0.088	0	0.088	0.062	0.074	0.406	0	0.861	0.166	0.44	0.316	0	0.441	0.352	0.326	0			sp|P08770|TRA1_MAIZE	Putative AC transposase OS=Zea mays PE=2
TRINITY_DN19557_c0_g1_i1	0.472	12.005	14.537	2.868	1.752	0.328	6.991	0.949	0.697	22.218	7.142	90.889	10.567	58.79	12.076	6.376	64.53	41.395	39.469	0.905			sp|Q9D4D4|TKTL2_MOUSE	Transketolase-like protein 2 OS=Mus musculus
TRINITY_DN19587_c0_g1_i1	0	1.314	0.435	0.417	0.186	0.277	0.777	0	0	1.551	0.439	4.968	0.238	10.111	0.967	0.722	1.841	1.785	2.313	0
TRINITY_DN19588_c0_g1_i1	1.044	52.466	89.81	15.804	5.849	2.746	30.371	2.962	2.147	88.642	16.606	287.553	53.62	173.494	51.119	23.394	164.166	105.851	124.798	4.043			sp|A7HZ35|GPMA_PARL1	2,3-bisphosphoglycerate-dependent phosphoglycerate
TRINITY_DN19603_c0_g2_i1	0.282	14.175	31.845	7.025	2.957	0.594	12.723	0.782	0.508	34.237	5.364	151.669	21.009	62.832	18.368	6.154	89.841	57.315	78.131	1.749			sp|Q11118|WOS2_SCHPO	Protein wos2 OS=Schizosaccharomyces pombe
TRINITY_DN19613_c0_g1_i1	0.273	6.554	5.874	2.984	0.372	0.717	3.451	0.545	0.246	8.206	3.461	30.851	5.118	26.442	4.539	1.973	15.995	12.414	13.668	0.484			sp|P73300|RL36_SYNY3	50S ribosomal protein L36 OS=Synechocystis
TRINITY_DN19617_c0_g1_i1	0.141	4.084	4.095	1.318	0.58	0.092	2.045	0.378	0.197	8.068	1.433	25.011	3.077	17.125	4.989	1.389	18.914	11.517	11.892	0.298			sp|Q9YGL9|AT2A3_CHICK	Sarcoplasmic/endoplasmic reticulum calcium
TRINITY_DN19637_c0_g1_i1	0	3.475	7.079	1.802	0.876	0	2.655	0	0.344	8.917	1.38	26.624	6.081	14.936	4.386	2.445	17.053	10.074	12.795	0.571			sp|O64644|SAP18_ARATH	Histone deacetylase complex subunit SAP18
TRINITY_DN19643_c0_g1_i1	0	0.423	0.732	0.426	0.23	0.092	0	0	0.156	1.043	1.108	3.666	1.502	3.201	0	0.792	1.156	0.13	2.937	0.198
TRINITY_DN1964_c0_g1_i1	0	0	0.046	0	0	0	0	0	0	0.083	0.857	0.801	0	0	0.804	0	0	0.583	0.931	0			sp|P10978|POLX_TOBAC	Retrovirus-related Pol polyprotein from
TRINITY_DN19653_c0_g1_i2	0.199	3.281	2.78	0.194	0.219	0	1.593	0.211	0.156	4.828	0.742	18.821	2.673	13.407	3.151	1.778	12.175	6.336	6.431	0.384			sp|Q12230|LSP1_YEAST	Sphingolipid long chain base-responsive
TRINITY_DN19661_c0_g1_i3	0	0.838	0.602	0	0.12	0	0.059	0.088	0.025	0.822	0.073	5.92	0.725	3.412	0	0.347	2.762	1.887	1.728	0.124			sp|Q60DX1|TPK3_ORYSJ	Thiamine pyrophosphokinase 3 OS=Oryza sativa
TRINITY_DN19687_c0_g1_i1	0	0.123	0.102	0.058	0.033	0	0.088	0	0	0.074	0.324	2.264	0.218	1.367	0.105	0	0.715	0.379	0.749	0
TRINITY_DN19706_c0_g1_i1	0	0	0.547	0.097	0	0	0.098	0	0	0.738	0.397	3.015	0.176	0.64	0.192	1.056	1.156	0.971	1.181	0
TRINITY_DN19749_c0_g1_i1	0	0	0.334	0	0	0	0	0	0	0	0.115	1.543	0.363	3.937	0.182	0	0.921	0.194	0.24	0
TRINITY_DN19806_c0_g1_i2	0	0.115	0	0	0	0	0.236	0	0.057	0	1.569	3.386	0.041	22.257	0.249	1.973	6.308	2.433	2.544	0
TRINITY_DN19867_c0_g1_i1	0.364	7.798	5.902	1.773	0.92	0.338	3.608	0.765	0.221	7.338	2.332	32.003	4.807	32.549	5.937	2.459	24.165	12.312	12.891	0.211			sp|A5H0J4|UPP_LACKL	Uracil phosphoribosyltransferase OS=Lachancea
TRINITY_DN19893_c0_g1_i1	0	0	0	0.203	0	0	0	0	0.082	0.249	0.596	4.467	0.425	2.408	0.479	0.181	3.399	1.767	0.566	0			sp|Q12010|YPQ1_YEAST	Probable vacuolar amino acid transporter
TRINITY_DN19957_c0_g1_i1	0	2.558	3.298	0.436	0.219	0.113	0.639	0.281	0	3.941	0.701	9.335	5.553	6.9	2.097	1.542	4.427	3.709	4.943	0.372
TRINITY_DN19974_c0_g1_i1	0	0.053	0.074	0	0	0	0.069	0	0.107	0	0.366	1.983	0	2.58	0.23	0.236	1.92	1.545	0.547	0
TRINITY_DN199_c0_g1_i1	0	0	0.13	0	0	0	0.059	0	0	0.102	0.199	1.863	0.176	1.519	0.182	0.222	1.92	0.5	0.825	0
TRINITY_DN20030_c0_g1_i1	0	1.006	1.205	1.192	0.405	0	0.649	0	0.09	1.172	1.339	5.479	0.922	7.702	0.871	4.279	4.584	1.841	3.033	0
TRINITY_DN20032_c0_g1_i1	0	0.035	0	0	0	0	0.157	0	0	0.102	0	1.202	0.052	0.822	0.144	0	1.166	0.278	0.336	0
TRINITY_DN20038_c0_g1_i1	0	1.358	4.207	0.407	0.175	0.133	1.17	0.246	0.188	3.065	0.92	16.898	2.279	11.123	2.528	1.334	11.95	7.271	10.222	0.67					TraesCS3D02G128800.2	cds chromosome:IWGSC:3D:87923155:87926879:1
TRINITY_DN20069_c0_g1_i1	0.091	1.614	3.215	1.202	0.241	0	2.006	0.29	0.475	4.394	0.784	16.868	1.958	9.069	3.064	1.222	10.226	7.354	9.934	0.099
TRINITY_DN20073_c0_g1_i1	0	0	0	0	0	0	0	0	0	0	0.261	1.112	0.259	0.449	0	0	0.176	0.204	0.461	0			sp|P52485|UBCD2_DROME	Ubiquitin-conjugating enzyme E2-24 kDa
TRINITY_DN20073_c0_g1_i2	0.124	2.082	3.252	0.969	0.46	0.195	1.583	0.044	0.369	3.766	1.108	21.255	2.579	13.608	2.969	1.056	15.29	7.733	7.66	0.36			sp|P46595|UBC4_SCHPO	Ubiquitin-conjugating enzyme E2 4 OS=Schizosaccharomyces
TRINITY_DN20116_c0_g1_i2	0	0.229	0.269	0.233	0.055	0.133	0.551	0	0.025	0.785	0	2.664	0.218	1.376	0.498	0.278	2.282	1.554	0.941	0			sp|Q5AGD1|APTH1_CANAL	Acyl-protein thioesterase 1 OS=Candida
TRINITY_DN20127_c0_g1_i1	0	0.115	0.222	0.068	0	0	0.197	0	0.107	0	0.512	1.332	0.155	0.516	0.172	0.236	0.999	0.712	0.24	0
TRINITY_DN20148_c0_g1_i1	0	1.182	0.76	0.116	0.033	0.113	0.629	0.07	0.098	1.652	0.345	8.324	0.798	4.654	0.814	0.945	3.849	2.054	2.515	0
TRINITY_DN20285_c0_g1_i1	0	0.476	4.41	2.384	0.81	0.799	2.035	0	0.975	6.037	3.932	28.697	6.04	7.951	6.876	4.501	3.712	6.161	11.672	1.352
TRINITY_DN20307_c0_g1_i1	0	0	0	0	0	0	0.079	0	0	0.148	0.052	0.962	0.052	0.946	0.077	0	0.382	0.046	0.307	0
TRINITY_DN20337_c0_g1_i1	0.099	2.179	2.687	0.407	0.383	0.102	1.839	0.185	0.115	4.809	1.077	13.723	3.823	12.022	2.739	0.972	7.229	6.235	4.55	0.223			sp|Q9D0J4|ARL2_MOUSE	ADP-ribosylation factor-like protein 2 OS=Mus
TRINITY_DN20383_c0_g1_i2	0	1.905	1.584	0.31	0	0	0.305	0.088	0.082	2.086	0.502	9.756	0.891	6.861	0.565	1.459	4.476	2.886	3.465	0
TRINITY_DN20385_c0_g1_i1	0	0.706	0.306	0.291	0	0.389	1.141	0	1.197	0	2.259	15.646	0.342	24.349	0.776	3.445	8.806	2.59	3.475	1.327
TRINITY_DN20385_c0_g2_i1	0	0	1.028	0	0	0	0.836	0	0	1.062	1.485	12.37	0	17.45	0.642	0	10.363	3.247	3.724	0
TRINITY_DN20412_c0_g1_i2	0	0.741	1.158	0.223	0	0	0.964	0	0.188	2.548	2.991	22.227	0.466	19.781	0.814	2.57	16.417	7.854	6.93	0
TRINITY_DN20426_c0_g1_i1	0	0.529	0.917	0.417	0.186	0.041	0.718	0	0.115	3.111	0.502	8.244	1.492	3.392	0.651	0.625	6.475	3.469	3.724	0.186
TRINITY_DN20429_c0_g1_i2	0	0	0.176	0.097	0.066	0	0	0.018	0.016	0.203	0	1.172	0.104	0.325	0.201	0.208	1.959	0.527	0.806	0.037
TRINITY_DN20445_c0_g1_i1	0	0.423	4.021	6.143	1.873	0.717	2.605	0	0.393	1.126	3.932	18.571	1.885	21.234	3.476	5.584	22.686	3.478	6.229	2.394
TRINITY_DN20451_c0_g1_i1	0	4.525	6.838	1.696	1.271	0.154	4.051	0.483	0.123	13.311	1.767	39.605	6.029	18.463	5.506	1.445	27.652	19.749	18.333	0.583			sp|Q7SEK1|EIF3M_NEUCR	Eukaryotic translation initiation factor
TRINITY_DN20454_c0_g2_i1	0	0.123	0.213	0.097	0	0	0.187	0	0	0.415	0.052	2.354	0.031	1.443	0.211	0	1.313	1.184	0.691	0
TRINITY_DN20461_c0_g1_i1	0	1.085	5.967	0	0	0	2.773	0	0.246	5.114	4.883	46.516	0.456	27.455	2.049	3.028	34.802	14.884	14.388	0			sp|P54982|CRTI_PHYB8	Phytoene desaturase OS=Phycomyces blakesleeanus
TRINITY_DN20469_c0_g1_i1	0	10.356	17.28	3.052	1.774	2.562	4.719	0	0.811	13.671	4.371	62.573	27.193	45.927	8.083	4.584	19.933	18.75	23.996	1.513
TRINITY_DN20495_c0_g1_i1	0	6.854	14.019	2.481	1.205	0.359	4.552	0.281	0.377	18	2.06	54.72	10.235	19.332	8.063	2.667	29.963	23.533	27.509	1.749			sp|O43102|CBF5_ASPFU	Centromere/microtubule-binding protein cbf5
TRINITY_DN20520_c0_g1_i1	0	0.132	0	0	0	0	0	0	0	0.092	0.282	0.651	0.062	1.061	0.086	0	0.362	0.046	0.125	0
TRINITY_DN20525_c0_g1_i3	0.563	14.704	19.096	5	0.679	0.697	8.269	0.589	0.344	17.871	5.72	71.798	17.238	55.57	11.291	8.502	30.512	27.011	34.026	1.687			sp|F4I9J7|Y14_ARATH	RNA-binding protein Y14 OS=Arabidopsis thaliana
TRINITY_DN20548_c0_g1_i1	0	1.076	0.964	0.107	0.164	0.102	0.541	0.149	0.082	1.902	0.303	5.94	0.642	5.39	0.824	0.25	4.427	2.821	2.121	0.112
TRINITY_DN20577_c0_g1_i1	0	0.75	0.676	0.136	0	0.072	0.324	0.044	0.115	0.738	0.366	3.526	0.508	1.854	0.862	0.417	2.645	1.425	1.353	0
TRINITY_DN20578_c0_g1_i3	0.099	0.529	1.659	0.242	0.066	0.102	0.747	0	0.115	1.662	1.464	15.235	0.518	13.006	1.618	1.625	12.548	3.682	3.302	0.112
TRINITY_DN20595_c0_g1_i1	0	0	0	0	0	0	0	0	0	0.055	0	1.282	0	0.946	0	0	0.666	0.231	0.163	0
TRINITY_DN20601_c0_g1_i1	0	0	0	0	0	0	0	0	0.033	1.098	0	2.965	0	0	0.393	0.528	1.567	0.87	1.555	0			sp|Q8BH75|RNF41_MOUSE	E3 ubiquitin-protein ligase NRDP1 OS=Mus
TRINITY_DN20613_c0_g1_i2	0.166	2.682	5.995	1.483	0.11	0.338	2.802	0.536	0.098	6.249	1.485	34.727	4.071	20.708	4.884	0	13.586	11.572	10.309	0.372
TRINITY_DN2062_c0_g1_i1	0	0.212	0.315	0	0	0	0.138	0	0	0.12	0.282	3.936	0	1.644	0.192	0.069	1.332	0.703	1.632	0			sp|O74852|YQ92_SCHPO	Uncharacterized MFS-type transporter C18.02
TRINITY_DN20638_c0_g1_i2	0	0	0.278	0	0	0	0.305	0	0	0.591	0.345	3.115	0.041	2.141	0.057	1	4.437	0.925	1.632	0			sp|D4AM78|CDA_ARTBC	Chitin deacetylase ARB_04768 OS=Arthroderma
TRINITY_DN20645_c0_g1_i1	0	1.429	2.39	0.446	0.164	0.246	0.61	0	0.172	3.646	0.993	11.058	2.041	7.807	1.733	0.945	8.581	4.866	5.452	0.273
TRINITY_DN20700_c0_g1_i1	0	0.838	0.204	0	0.055	0	0.187	0.053	0.107	0.6	0.272	3.626	0.186	3.249	0.105	0.111	3.027	1.101	0.672	0
TRINITY_DN20708_c0_g1_i1	0.075	0.679	1.918	0.494	0.022	0.123	0.728	0.07	0.229	1.108	0.952	11.058	1.295	6.594	0.929	1.417	8.767	3.228	4.78	0.05
TRINITY_DN20733_c0_g1_i1	0	0.714	0.222	0.242	0.088	0	0.049	0	0	0.655	0.282	2.714	0.363	4.119	0.22	0.278	1.724	0.444	0.787	0
TRINITY_DN20740_c0_g1_i1	0	0.079	0.213	0.097	0	0	0.275	0.088	0.156	0.425	0.209	1.342	0	1.94	0.508	0	2.233	0.944	0.23	0
TRINITY_DN20771_c0_g1_i2	0	0	0	0	0	0	0	0	0	0.212	0	4.307	0	9.604	0.182	0.361	4.026	0.999	1.219	0
TRINITY_DN20879_c0_g1_i2	0	0	0	0	0	0	0	0	0	1.246	0	1.803	0	1.5	0.306	0	0.931	0.944	0.701	0
TRINITY_DN20879_c0_g1_i3	0	1.914	3.206	0.601	0.142	0.072	1.485	0.044	0.377	2.197	1.234	18.821	1.585	11.267	2.04	1	10.892	4.977	5.116	0.161
TRINITY_DN20890_c0_g1_i1	0	0	0	0	0	0	0	0	0	1.754	0	0	0	9.805	1.513	0	2.478	0	1.776	0			sp|P40996|SCD2_SCHPO	Protein scd2/ral3 OS=Schizosaccharomyces
TRINITY_DN20929_c0_g1_i1	0.157	6.051	8.367	2.897	0.975	0.994	4.002	0.633	0.484	8.261	5.333	46.316	6.444	36.333	3.945	4.362	28.484	14.393	19.398	0.558
TRINITY_DN20959_c0_g1_i1	0	1.579	4.355	1.095	0.646	0	2.281	0.237	0.066	5.852	0.805	19.903	3.097	6.078	2.768	2.014	12.802	9.426	9.454	0.558			sp|Q10191|LTV1_SCHPO	Protein LTV1 OS=Schizosaccharomyces pombe
TRINITY_DN20992_c0_g1_i1	0.157	1.367	2.974	0.63	0.274	0.164	1.141	0.053	0.336	2.908	0.774	13.793	1.927	18.768	2.471	0.528	9.736	3.783	2.803	0.099
TRINITY_DN20994_c0_g1_i2	0	0	0.046	0	0	0	0.688	0	0.09	0.102	0.638	7.382	0	12.729	0.105	0.417	8.159	1.998	0.96	0			sp|A0A084B9Z1|SAT3_STACB	Short-chain dehydrogenase/reductase
TRINITY_DN20997_c0_g1_i3	0	6.554	14.13	3.149	0.964	0.553	6.116	0.65	0.238	14.169	3.524	44.062	10.857	39.381	8.466	4.654	23.567	18.797	19.274	0.31
TRINITY_DN21026_c0_g1_i1	0	0.362	1.538	0.087	0.318	0	0.6	0.079	0	0.997	0.586	5.769	1.098	0.956	1.542	0.306	2.478	2.146	2.304	0.136
TRINITY_DN21040_c0_g1_i2	0.273	6.774	5.726	2.471	0.745	0.707	2.497	0.624	0.148	6.203	3.294	22.277	5.522	28.43	4.913	2.32	12.352	9.213	11.153	0.322			sp|Q0P436|TM14C_DANRE	Transmembrane protein 14C OS=Danio rerio
TRINITY_DN21064_c0_g1_i2	0.083	0.379	1.659	0	0	0	0.442	0.158	0	1.717	0.094	6.971	0.373	4.042	1.322	0.32	5.711	2.609	2.438	0
TRINITY_DN21091_c0_g1_i2	0.066	0.812	0.537	0.368	0	0.133	0.383	0.132	0.041	0.84	0.084	8.714	0.228	2.236	0.651	0.778	4.036	2.128	2.486	0
TRINITY_DN21135_c0_g1_i2	0.298	7.851	10.942	2.674	0.898	0	4.759	0.677	0.27	9.028	3.963	38.463	9.551	40.031	6.129	3.834	16.211	13.875	18.112	0.682			sp|Q9SMU7|SRP09_ARATH	Signal recognition particle 9 kDa protein
TRINITY_DN21142_c0_g1_i1	0	0.353	0.278	0	0.077	0.123	0.167	0.149	0	0.674	0.094	2.364	0.704	3.708	0.22	0	2.312	1.332	2.035	0
TRINITY_DN21159_c0_g1_i2	0	0.123	0.686	0	0	0	0.423	0	0.139	1.265	1.401	8.704	0.062	7.893	0.287	0.653	6.798	3.515	3.215	0			sp|Q9P7T9|YI7H_SCHPO	Uncharacterized membrane protein C977.17
TRINITY_DN21228_c0_g1_i1	0	0.194	0.028	0.029	0	0	0.098	0.026	0	0.249	0.052	0.351	0.176	1.357	0.086	0.097	0.49	0.278	0.182	0
TRINITY_DN21238_c0_g1_i1	0	0.229	0.713	0	0.044	0	0.767	0.044	0.303	0.48	1.84	4.738	0.135	4.081	0.527	0.834	5.338	3.802	1.497	0			sp|A8NVB7|N6235_COPC7	Adenylate-forming reductase 06235 OS=Coprinopsis
TRINITY_DN21259_c0_g1_i1	0.157	5.037	15.649	2.655	0.591	0	4.572	0.29	0.197	13.163	1.161	53.468	7.013	18.902	8.427	4.251	41.081	24.532	26.895	0.26			sp|Q58DS9|RAB5C_BOVIN	Ras-related protein Rab-5C OS=Bos taurus
TRINITY_DN21286_c0_g1_i1	0	0.168	0.056	0.048	0	0	0.147	0	0.082	0.443	0.335	1.092	0.124	1.691	0.134	0.097	0.617	0.352	0.739	0.087
TRINITY_DN21305_c0_g2_i1	0.075	5.954	15.52	2.577	1.807	0.143	6.922	0.686	0.426	20.381	2.782	56.483	11.002	31.125	9.078	3.515	33.499	22.571	28.728	0.657			sp|P50085|PHB2_YEAST	Prohibitin-2 OS=Saccharomyces cerevisiae
TRINITY_DN21319_c0_g1_i1	0.083	0.953	1.066	0.649	0	0	0.58	0.053	0.246	2.52	0.533	7.482	0.901	3.87	1.006	1.181	5.515	2.479	1.651	0
TRINITY_DN21323_c0_g1_i1	0.033	0.476	0.769	0.165	0.131	0	0.452	0.062	0.057	1.514	0.376	5.82	0.59	1.988	0.91	0.583	6.396	4.505	3.83	0			sp|P01129|CDC10_SCHPO	Start control protein cdc10 OS=Schizosaccharomyces
TRINITY_DN21324_c0_g1_i1	0.356	14.854	25.888	6.831	2.037	0.369	7.679	1.397	0.934	25.209	7.142	93.524	18.098	85.767	14.7	11.113	45.293	28.38	35.293	1.637			sp|Q03015|NDUS6_NEUCR	NADH-ubiquinone oxidoreductase 12 kDa subunit,
TRINITY_DN21339_c0_g1_i1	0.124	6.942	8.876	1.521	0.416	0.195	2.9	0.316	0.402	9.923	3.346	42.029	6.04	34.871	5.353	2.084	21.598	16.808	20.867	0.422			sp|P48601|PRS4_DROME	26S proteasome regulatory subunit 4 OS=Drosophila
TRINITY_DN21355_c0_g1_i1	0.306	9.694	12.406	2.442	1.435	0.738	6.017	0.686	0.574	18.055	2.802	60.219	9.986	35.157	10.534	2.25	37.799	24.023	24.524	0.645			sp|I1RNL0|C9MT2_GIBZE	Sphingolipid C9-methyltransferase 2 OS=Gibberella
TRINITY_DN21357_c0_g1_i1	0.265	2.223	1.288	0.659	0.131	0	1.455	0.343	0.361	1.643	1.119	3.085	1.336	9.069	3.055	1.556	4.329	3.552	1.277	0.149
TRINITY_DN21358_c0_g1_i2	0	2.47	5.337	0.921	0.405	0.205	1.76	0.193	0.238	7.089	0.878	19.943	5.252	6.919	2.988	1.417	11.392	7.52	10.213	0.571			sp|O94703|RPA12_SCHPO	DNA-directed RNA polymerase I subunit RPA12
TRINITY_DN21359_c0_g1_i1	0	4.657	3.373	0.833	0.559	0.051	1.819	0.246	0.205	5.068	1.684	22.146	2.87	13.56	2.174	2.098	10.02	7.419	11.403	0.223			sp|P04802|SYDC_YEAST	Aspartate--tRNA ligase, cytoplasmic OS=Saccharomyces
TRINITY_DN21374_c0_g1_i1	0.05	0.326	0.621	0.31	0.197	0.102	0.344	0	0.115	1.255	0.314	4.918	0.445	3.736	0.584	0.25	3.467	1.656	1.353	0			sp|P41890|SCN1_SCHPO	Cut9-interacting protein scn1 OS=Schizosaccharomyces
TRINITY_DN21378_c0_g1_i1	0	0.362	0.473	0.039	0	0	0.374	0	0.033	0.369	0.261	3.356	0.145	2.829	0.373	0.208	2.654	0.796	0.47	0
TRINITY_DN21388_c0_g1_i1	0	2.585	0.76	0.862	0.482	0	0.678	0.316	0.287	0.942	3.085	9.966	1.336	9.346	0.622	2.723	1.969	4.126	3.34	0
TRINITY_DN21392_c0_g1_i1	0.058	1.076	0.991	0.233	0.263	0.031	0.757	0.114	0.139	1.708	0.356	4.668	0.746	6.642	1.14	0.347	4.829	2.211	1.296	0.074
TRINITY_DN21394_c0_g1_i2	0	0	0	0	0	0	0.216	0	0	0.665	0.303	3.105	0.29	3.803	0.594	0	1.313	0.897	1.411	0			sp|O43012|DCTD_SCHPO	Deoxycytidylate deaminase OS=Schizosaccharomyces
TRINITY_DN21398_c0_g1_i1	0	0.45	0.195	0	0	0	0.698	0.079	0	0.628	2.07	5.329	0	9.633	0.316	1.431	5.074	1.23	1.709	0			sp|P0CP28|NPC2_CRYNJ	Phosphatidylglycerol/phosphatidylinositol
TRINITY_DN21399_c0_g1_i3	0	2.664	5.411	0.921	0.756	0.154	2.605	0.334	0.156	4.726	1.171	17.268	2.807	15.433	3.084	0.875	12.401	8.89	9.522	0.099			sp|O00233|PSMD9_HUMAN	26S proteasome non-ATPase regulatory subunit
TRINITY_DN21428_c0_g1_i2	0.05	0.485	0.602	0.116	0.088	0	0.226	0.035	0.016	0.969	0.146	2.955	0.383	2.169	0.46	0.264	2.331	0.99	1.277	0
TRINITY_DN21431_c0_g1_i1	0.141	1.667	1.464	0.63	0.099	0	0.492	0.026	0.057	2.105	0.408	8.043	1.233	4.845	1.657	0	5.995	3.635	2.995	0.273
TRINITY_DN21433_c0_g1_i1	0.977	31.614	21.107	4.196	4.425	1.383	10.481	1.661	2.549	18.387	8.648	88.185	21.34	114.121	10.812	6.793	59.652	23.126	28.056	2.17
TRINITY_DN21444_c0_g1_i3	0.795	12.914	10.859	2.858	1.61	0.687	4.621	0.343	0.402	17.326	4.716	57.314	9.655	56.898	7.699	5.501	35.027	22.774	26.357	0.459			sp|O64818|Y2309_ARATH	Uncharacterized protein At2g23090 OS=Arabidopsis
TRINITY_DN21452_c0_g1_i1	0.265	6.916	9.238	2.946	0.712	0	3.677	0.861	0.475	13.726	1.067	48.079	6.06	21.559	9.021	3.084	26.545	18.658	18.851	1.067
TRINITY_DN21455_c0_g1_i1	0	0.141	0.371	0.087	0	0	0.079	0	0.074	0.748	0.565	3.015	0.404	0.774	0.45	0	1.156	0.999	0	0.136
TRINITY_DN21461_c0_g1_i2	0.613	3.175	3.169	1.24	0.34	0.318	1.603	0.264	0.426	7.126	1.474	18.711	5.014	16.79	3.074	3.306	11.705	6.771	7.621	0.471
TRINITY_DN21487_c0_g1_i2	0.066	1.27	0	0.891	0	0.287	0	0.044	0.041	2.714	1.788	7.562	2.3	8.438	1.58	1.723	4.692	2.849	3.974	0.161
TRINITY_DN21495_c0_g1_i1	0	0.679	1.427	0.572	0.175	0.051	0.462	0.035	0.033	2.455	0.366	7.983	1.015	3.717	0.996	0.264	3.771	3.561	4.271	0.298
TRINITY_DN21499_c0_g1_i1	0	0	0.649	0	0	0	0.167	0	0	0.609	0	8.714	0.176	6.603	0.306	0.736	2.292	1.314	1.113	0
TRINITY_DN214_c0_g1_i2	0	0.423	1.251	0.397	0.559	0	1.082	0.185	0	1.689	1.454	7.993	1.43	8.056	1.877	0	5.368	4.079	3.273	0
TRINITY_DN21503_c0_g1_i1	0.083	2.399	3.363	0.921	0.427	0.338	1.593	0.053	0.098	4.551	0.837	13.602	2.175	6.441	1.389	0.32	5.779	5.337	6.095	0.558			sp|Q4WPF7|DPH4_ASPFU	Diphthamide biosynthesis protein 4 OS=Neosartorya
TRINITY_DN21523_c0_g2_i1	0	0	0.343	0	0	0	0	0	0.066	0.138	0.084	1.593	0.373	0.984	0.211	0	0.96	0.389	0.192	0
TRINITY_DN21529_c0_g1_i1	0	0	0	0	0	0	0	0	0	0	0.282	1.092	0.383	1.806	0	0	0	0.259	0.269	0
TRINITY_DN21546_c0_g1_i1	0	0.282	0.139	0.039	0.022	0	0.246	0	0.016	0.397	0.021	1.853	0.28	1.214	0.192	0	1.41	0.888	0.893	0
TRINITY_DN21547_c0_g1_i1	0	0.803	1.103	0.281	0.175	0.041	0.344	0	0.082	1.228	0.282	6.481	1.098	5.581	0.929	0.403	6.563	2.572	2.764	0.211			sp|P57681|PCYOX_ARATH	Farnesylcysteine lyase OS=Arabidopsis thaliana
TRINITY_DN21551_c0_g1_i2	0.058	1.685	0.936	0.155	0.033	0.061	0.619	0.035	0.164	1.255	0.314	6.37	1.202	6.336	1.302	0.945	4.359	2.322	3.129	0.062
TRINITY_DN21552_c0_g1_i1	0	0.494	0.158	0.068	0	0	0.236	0.026	0.057	0.72	0.491	2.544	0.332	1.367	0.364	0.306	2.606	1.018	0.451	0
TRINITY_DN21561_c0_g1_i1	0	0.291	0.769	0.107	0.022	0	0.462	0.07	0.041	0.785	0.115	3.936	0.466	2.819	0.536	0.583	2.958	1.665	1.277	0
TRINITY_DN21566_c0_g1_i1	0.166	5.575	4.994	1.24	0.471	0.256	2.389	0.193	0.287	7.901	0.795	26.283	4.019	16.494	4.453	1.417	16.417	10.971	10.069	0.248			sp|Q09785|GCSP_SCHPO	Putative glycine dehydrogenase (decarboxylating),
TRINITY_DN21569_c0_g1_i1	0	0	0.556	0	0	0	0.256	0	0	0.212	0	7.352	0.642	0.822	0.335	0	1.352	2.387	4.991	0
TRINITY_DN2156_c0_g1_i1	0	0	0	0	0	0	0.246	0	0	0.674	0	3.926	0.87	6.317	0	0	0.255	0.731	0.586	0.384
TRINITY_DN21571_c0_g1_i1	0	0.291	0.334	0.048	0.044	0.072	0.246	0	0	0.397	0.167	1.512	0.176	1.347	0.527	0.264	1.313	0.49	0.902	0
TRINITY_DN21573_c0_g1_i2	0	0.538	0.612	0.155	0.099	0.041	0.501	0.044	0.066	1.034	0.303	5.95	0.456	3.985	0.996	0.389	4.721	2.424	1.718	0			sp|P39109|YCFI_YEAST	Metal resistance protein YCF1 OS=Saccharomyces
TRINITY_DN21575_c0_g1_i1	0.19	7.092	10.118	2.461	0.57	0.389	3.569	0.483	0.221	11.704	2.436	42.219	7.997	22.132	5.133	2.917	17.533	16.928	18.083	0.757
TRINITY_DN21577_c0_g1_i1	0.025	0.935	2.604	0.921	0.307	0.205	0.895	0.167	0.049	3.148	0.774	13.442	1.502	4.597	2.289	0.556	10.735	6.503	7.036	0.099			sp|O14232|MTR4_SCHPO	ATP-dependent RNA helicase mtr4 OS=Schizosaccharomyces
TRINITY_DN21594_c0_g1_i1	0	0.238	1.306	0.32	0.088	0	0.226	0.167	0	1.357	0.68	7.512	0.311	7.005	0.996	0.764	6.71	3.524	4.703	0
TRINITY_DN21609_c0_g2_i1	0	0.573	0.889	0.126	0	0	0.482	0	0.098	0.822	0.753	11.709	0.818	5.466	1.149	0.222	5.329	2.313	2.755	0
TRINITY_DN21610_c0_g1_i1	0	0	0	0	0	0	0	0	0	0.24	0.23	0.601	0	1.787	0.22	0	0.294	1.064	0.298	0			sp|O14036|SMD2_SCHPO	Small nuclear ribonucleoprotein Sm D2 OS=Schizosaccharomyces
TRINITY_DN21617_c0_g1_i4	0	0.238	0.343	0.078	0.022	0	0.403	0	0.082	0.702	0.22	1.623	0.456	1.883	0.642	0	2.38	0.74	0.672	0.05
TRINITY_DN21625_c0_g1_i2	0	0	0	0	0	0	0	0	0	0.268	0	1.012	0	1.672	0.182	0	0.343	0.407	0	0
TRINITY_DN21640_c0_g1_i1	0	0.044	0.259	0.184	0	0	0.049	0	0.041	0.498	0.261	1.913	0.197	0.373	0.124	0.167	0.764	0.231	0.461	0
TRINITY_DN21653_c0_g1_i2	0	0.106	2.594	3.711	0.252	0	2.389	0	0	4.145	2.175	28.016	2.901	4.864	3.036	1.209	7.317	3.894	7.4	1.091
TRINITY_DN21679_c0_g1_i1	0.033	1.279	0.463	0.368	0.12	0	1.15	0.158	0.123	0.877	0.387	9.946	0.725	4.434	1.082	0.431	4.418	2.646	3.427	0.248			sp|Q9UW15|RIR1_NEUCR	Ribonucleoside-diphosphate reductase large
TRINITY_DN21680_c0_g1_i1	0.066	0.52	0.593	0.233	0	0.072	0	0.088	0.156	0.498	0.209	3.436	1.274	5.208	0.201	0	0.509	0.157	1.325	0.074
TRINITY_DN21680_c0_g1_i2	0	0.132	0	0	0.066	0	0.57	0	0	0.517	0.491	1.853	0.093	1.682	0.393	0.264	2.978	1.175	0.538	0
TRINITY_DN21681_c0_g1_i1	0	0.75	0.825	0.359	0.066	0.051	0.796	0.062	0.09	1.708	0.45	7.943	0.694	4.291	0.977	0.736	5.044	3.062	3.83	0.062
TRINITY_DN21692_c0_g1_i1	0.389	13.293	22.58	4.002	1.271	0.625	7.59	0.826	0.541	25.91	5.218	80.933	15.063	48.594	15.686	6.487	48.701	36.983	39.67	1.997			sp|O94122|KPYK_AGABI	Pyruvate kinase OS=Agaricus bisporus GN=pkiA
TRINITY_DN21693_c0_g1_i1	0	0.344	0.528	0.494	0.099	0	0.492	0.026	0.057	1.145	0.146	4.848	0.87	2.886	1.187	0.611	4.408	2.479	2.025	0.05			sp|Q08760|RAX1_YEAST	Bud site selection protein RAX1 OS=Saccharomyces
TRINITY_DN21706_c0_g1_i1	0	0.088	0.111	0	0	0	0.049	0	0	0.046	0.115	0.962	0.093	1.682	0.048	0.278	0.46	0.25	0.365	0
TRINITY_DN21710_c0_g1_i1	0	0.123	0.185	0.126	0.033	0	0.157	0	0.016	0.378	0.115	1.402	0.052	0.851	0.192	0.056	0.833	0.703	0.48	0.025			sp|O13833|CID1_SCHPO	Terminal uridylyltransferase cid1 OS=Schizosaccharomyces
TRINITY_DN21713_c0_g1_i1	0.017	0.176	0.222	0.058	0.033	0.041	0.157	0	0.016	0.517	0.094	1.502	0.145	1.099	0.393	0.097	1.254	0.749	0.557	0.037
TRINITY_DN21716_c0_g1_i1	0	0	0	0	0	0	0	0	0	0.268	0	2.314	0	1.978	0.153	0	1.401	0	0	0
TRINITY_DN21717_c0_g1_i3	0.05	1.261	3.521	1.318	0	0.051	1.141	0.035	0.066	2.991	0.889	15.666	1.823	9.967	0.986	2.084	9.913	5.384	6.94	0.434			sp|P32604|F26_YEAST	Fructose-2,6-bisphosphatase OS=Saccharomyces
TRINITY_DN21724_c0_g1_i2	0.157	3.061	4.299	0.455	0.854	0	1.475	0.202	0.385	3.6	0.711	13.212	2.787	10.77	3.17	1.139	10.069	4.727	4.943	0.372
TRINITY_DN21730_c0_g1_i2	0	0	0	0	0	0	0	0	0	0.055	0	2.364	0.073	1.061	0.105	0.222	0.901	0.592	0.432	0
TRINITY_DN21741_c0_g1_i2	0	0	0	0	0	0	0.138	0	0.098	0.268	0.878	1.693	0.404	1.625	0.326	0.222	0.617	0.426	0.288	0		Serine_Peptidases	sp|P34946|CPS1_PENJA	Carboxypeptidase S1 OS=Penicillium janthinellum
TRINITY_DN21745_c0_g1_i1	0	0	0	0	0	0	0	0	0	0	0.251	1.412	0.104	2.657	0	0	0.862	0.777	1.209	0			sp|Q9C2L8|RAB7_NEUCR	Probable Ras-related protein Rab7 OS=Neurospora
TRINITY_DN21745_c0_g1_i2	0	3.828	3.595	1.744	0	0	2.124	0.229	0.418	4.163	1.872	32.533	1.046	20.517	1.628	1.695	19.169	8.723	10.011	0			sp|Q9C2L8|RAB7_NEUCR	Probable Ras-related protein Rab7 OS=Neurospora
TRINITY_DN21749_c0_g1_i1	0	0	0	0	0	0	0.02	0	0	0.092	0.042	1.593	0	0.354	0.067	0	0.96	0.25	0.451	0
TRINITY_DN21749_c0_g1_i2	0	0.265	0.074	0	0	0	0	0	0	0.129	0.105	2.354	0.269	2.332	0.488	0.111	0.451	0.564	0.154	0
TRINITY_DN21751_c0_g1_i1	0	0.873	0.482	0.242	0.066	0.154	0.206	0.035	0.033	0.905	0.554	4.087	0.218	2.905	0.412	0.194	2.282	1.341	0.816	0.174			sp|Q20507|ACBP3_CAEEL	Acyl-CoA-binding protein homolog 3 OS=Caenorhabditis
TRINITY_DN21754_c0_g1_i1	0	0.873	0.389	0.329	0.285	0	0.796	0.044	0	3.84	0.376	10.577	0	1.109	1.58	0.597	6.612	4.348	2.947	0.087
TRINITY_DN21757_c0_g1_i1	0.439	5.883	13.277	2.132	0.646	0.277	3.225	0.457	0.418	10.588	2.834	42.61	6.402	24.512	4.29	1.473	26.349	16.715	23.247	0.198			sp|Q8VZP1|GPP2_ARATH	(DL)-glycerol-3-phosphatase 2 OS=Arabidopsis
TRINITY_DN21761_c0_g1_i2	0.025	0.997	0.871	0	0.055	0	0.688	0.105	0.049	0.498	0.46	2.925	0.622	4.491	1.006	0.361	2.645	1.175	1.987	0.198			sp|P30316|DPOD_SCHPO	DNA polymerase delta catalytic subunit OS=Schizosaccharomyces
TRINITY_DN21766_c0_g1_i3	0	0.265	0	0	0.044	0	0.305	0	0.033	0.582	0.45	2.805	0.425	2.59	0.546	0.236	1.665	0.25	0.758	0.074
TRINITY_DN21769_c0_g1_i2	0.157	2.143	0.398	0.475	0.175	0.051	0.58	0.035	0.09	1.449	0.575	5.028	0.891	4.358	0.938	0.806	2.468	2.007	1.401	0.124
TRINITY_DN21772_c1_g1_i3	0.861	13.064	32.902	7.936	1.117	0.932	14.394	1.204	1.582	37.32	11.628	180.857	13.281	111.76	24.056	9.363	148.337	71.662	72.65	2.034			sp|P87184|ALP2_ASPFU	Alkaline protease 2 OS=Neosartorya fumigata
TRINITY_DN21773_c0_g1_i2	0	0.141	0.139	0	0.055	0.031	0.197	0	0	0.443	0.094	1.222	0.321	0.134	0.057	0.111	0.578	0.379	0.49	0.161
TRINITY_DN21778_c0_g1_i1	0	0.079	0.037	0	0.033	0	0.187	0	0.025	0.249	0.073	1.543	0.093	0.516	0.259	0	1.048	0.574	0.509	0.099
TRINITY_DN21780_c0_g1_i1	0	0.318	0.621	0.368	0	0.092	0.285	0	0.074	0.498	0.418	3.826	0.238	2.552	0.211	0.528	4.29	2.424	6.306	0.074			sp|P06652|MPIP_SCHPO	M-phase inducer phosphatase OS=Schizosaccharomyces
TRINITY_DN21789_c0_g1_i4	0	0	0	0	0	0	0	0	0	0.526	0	6.37	0.342	4.778	0.211	0	6.798	2.535	2.63	0
TRINITY_DN21791_c0_g1_i1	0.041	0.159	0.574	0.213	0	0.113	0.924	0	0	1.431	0.941	16.878	0.901	11.945	0.986	1.625	14.154	8.954	4.847	0
TRINITY_DN21792_c0_g1_i1	0	3.026	1.64	0.514	0.131	0	1.573	0.615	0	2.382	1.276	21.085	1.761	7.597	3.716	0.5	15.339	4.773	7.496	0.236
TRINITY_DN21792_c0_g1_i2	0.538	12.393	27.277	6.628	0.723	0.984	4.415	0	0.762	12.535	6.567	71.718	6.806	61.552	7.24	10.669	47.193	41.599	82.037	0.943
TRINITY_DN21799_c0_g2_i1	0	1.12	0.426	0.242	0.361	0.154	0.305	0.035	0.115	1.255	0.973	4.608	1.285	3.727	0.68	0.57	3.321	1.619	1.008	0
TRINITY_DN21801_c0_g1_i4	0	0	0	0	0	0	0	0	0	0.582	0	0.501	0.114	0.573	0	0.306	0.255	0.213	0.211	0			sp|Q8X082|RFC5_NEUCR	Replication factor C subunit 5 OS=Neurospora
TRINITY_DN21805_c0_g1_i2	0.472	24.284	45.401	8.759	4.589	0.615	14.561	1.292	1.123	51.913	9.704	171.171	27.287	83.655	30.472	12.6	112.037	77.064	76.643	2.543			sp|P42894|ENO_NEOFR	Enolase OS=Neocallimastix frontalis PE=3
TRINITY_DN21812_c0_g1_i1	1.068	24.416	39.295	7.374	1.588	2.203	12.693	1.38	0.992	59.316	8.219	195.191	65.71	110.164	22.141	10.613	52.874	54.003	71.633	2.902			sp|P02289|H2BE_STRPU	Histone H2B, embryonic OS=Strongylocentrotus
TRINITY_DN21812_c0_g1_i3	0	0	0.389	0	0	0	0	0	0	0.332	0.22	1.062	0.59	1.519	0.105	0.764	0	0.157	0.729	0.211			sp|Q4PEF8|H2B_USTMA	Histone H2B OS=Ustilago maydis (strain 521
TRINITY_DN21815_c0_g1_i1	0.075	0.741	0.852	0.591	0.099	0.154	0.59	0	0.049	0.628	0.973	9.075	0.497	6.431	0.632	0	3.977	2.923	3.311	0
TRINITY_DN21816_c0_g1_i1	0.058	0.309	0.315	0.203	0	0	0.197	0	0.098	0.572	0.502	7.783	0.052	7.053	0.364	0.806	6.171	1.804	1.862	0.062
TRINITY_DN21824_c0_g1_i1	0	0.476	0.046	0.058	0	0	0.315	0	0	0.406	0.701	2.714	0.228	3.154	0	0.111	4.271	1.536	0.912	0
TRINITY_DN21830_c0_g1_i1	0	10.223	18.17	5.232	1.818	0.666	7.816	0.554	0.598	13.994	5.417	52.386	19.3	46.386	8.542	7.279	28.239	18.427	24.447	1.315
TRINITY_DN21839_c0_g1_i1	0.05	3.043	5.67	1.26	0.591	0.266	2.429	0.299	0.279	7.338	1.297	30.23	3.367	17.058	5.018	1.848	21.696	13.579	14.071	0.124
TRINITY_DN21844_c0_g1_i1	0.017	0.397	0.361	0.097	0.011	0.051	0.246	0.026	0.025	0.988	0.136	2.624	0.383	1.835	0.45	0.236	2.008	1.415	1.267	0.037			sp|F4J8L3|KN7K_ARATH	Kinesin-like protein KIN-7K, chloroplastic
TRINITY_DN21852_c0_g1_i1	0.099	1.605	3.734	1.541	0.394	0.031	2.556	0.176	0.238	8.151	0.931	27.946	4.682	9.155	2.854	0	15.731	12.136	12.411	0.67			sp|J9VQ03|NOG2_CRYNH	Nucleolar GTP-binding protein 2 OS=Cryptococcus
TRINITY_DN21855_c0_g1_i2	0	2.002	1.835	0.271	0	0	0.374	0.079	0.229	0.978	0.847	6.12	1.72	11.525	1.312	0.82	3.791	3.006	3.657	0
TRINITY_DN21858_c0_g1_i1	0	0.15	0.417	0.213	0.077	0	0.088	0	0	0.185	0.188	1.653	0.073	0.344	0.45	0.153	1.939	1.101	1.497	0.136			sp|Q7X2H8|CHOX_ARTGO	Choline oxidase OS=Arthrobacter globiformis
TRINITY_DN21863_c0_g1_i1	0	0.176	0.537	0.174	0.033	0.133	0.413	0.158	0.025	1.098	0.669	4.557	0.508	5.524	0.843	0	6.308	2.47	1.948	0			sp|Q07950|YEH2_YEAST	Sterol esterase 2 OS=Saccharomyces cerevisiae
TRINITY_DN21864_c0_g1_i1	0.34	5.619	33.606	2.025	2.289	0.359	13.244	0.879	0.41	54.987	1.37	137.807	14.317	36.295	22.064	9.155	129.276	66.991	95.83	1.6			sp|P23704|ATPB_NEUCR	ATP synthase subunit beta, mitochondrial
TRINITY_DN21867_c0_g1_i2	0.232	4.631	9.488	1.928	0.81	0.184	4.198	0.264	1.164	8.658	4.81	57.975	5.397	48.899	7.23	5.501	47.888	14.477	13.131	0.471
TRINITY_DN21868_c0_g1_i2	0	0	0	0	0	0	0.285	0	0.049	0	0.293	0.851	0	4.214	0.192	0.722	0.49	1.304	0.125	0			sp|Q96WJ0|ERG7_PNECA	Lanosterol synthase OS=Pneumocystis carinii
TRINITY_DN21868_c0_g1_i3	0	0	0	0	0	0	0.098	0	0.033	0.194	0	1.883	0.176	0.497	0.067	0.139	3.928	0.953	0.576	0			sp|Q96WJ0|ERG7_PNECA	Lanosterol synthase OS=Pneumocystis carinii
TRINITY_DN21871_c0_g1_i1	0	1.103	1.242	0.455	0.055	0.113	0.846	0.07	0.18	2.206	0.418	9.796	1.067	2.131	1.053	1.236	9.198	4.412	4.06	0.05			sp|Q1MTP1|THP3_SCHPO	THP3 homolog C2A9.11c OS=Schizosaccharomyces
TRINITY_DN21871_c0_g1_i4	0	0	0	0	0	0	0	0	0	0.471	0	0.511	0	3.45	0	0	0.921	0.648	0.691	0			sp|Q1MTP1|THP3_SCHPO	THP3 homolog C2A9.11c OS=Schizosaccharomyces
TRINITY_DN21873_c0_g1_i1	0	0.238	0.315	0	0	0	0	0	0	0.222	0.084	2.985	0.176	0.975	0.249	0	1.704	0.509	0.432	0
TRINITY_DN21880_c0_g1_i4	0	0	0	0	0	0	0	0	0	0.36	0.45	0.601	0	1.739	0.316	0	0.49	0.574	1.555	0
TRINITY_DN21887_c0_g1_i1	0.273	2.84	1.992	1.705	0	0.195	1.308	0.062	0.656	2.049	0.962	15.455	1.202	15.873	1.8	1.681	8.11	5.051	4.972	0.211			sp|Q86AT9|DHKI_DICDI	Hybrid signal transduction histidine kinase
TRINITY_DN21893_c0_g1_i1	0	0.476	1.019	0.339	0.044	0	1.101	0.035	0.148	1.865	0.439	5.579	0.394	3.173	1.187	0.625	4.398	2.914	2.198	0.136
TRINITY_DN21906_c0_g1_i1	0.497	36.924	47.189	9.68	2.191	1.527	15.279	0.993	0.754	49.089	9.16	181.398	27.774	125.655	30.491	12.447	104.485	61.653	68.398	5.147			sp|Q870G5|GBG_LENED	Guanine nucleotide-binding protein subunit
TRINITY_DN21909_c0_g1_i2	0	0.265	0.148	0.048	0.022	0	0.128	0	0	0.203	0.23	1.112	0.124	0.659	0	0.194	0.862	0.361	0.873	0
TRINITY_DN21914_c0_g1_i1	0.629	10.232	16.205	2.965	1.062	0	7.217	0.624	0.852	23.464	4.465	77.037	15.995	63.253	10.611	5.515	44.519	30.544	35.351	1.091
TRINITY_DN21928_c0_g2_i1	0	0.097	0	0.058	0	0	0	0	0	0.295	0.188	0.851	0.104	0.621	0.153	0	0.284	0.278	0.134	0.087
TRINITY_DN21929_c0_g1_i1	0.05	2.382	4.253	0.698	0.34	0.246	1.544	0.062	0.139	5.234	1.014	18.761	3.74	12.194	2.222	0.834	9.452	6.762	7.957	0.273			sp|P21560|CBP3_YEAST	Protein CBP3, mitochondrial OS=Saccharomyces
TRINITY_DN21929_c0_g1_i2	0	0	0	0	0	0	0	0	0	0.434	0.241	1.342	0	0.363	0	0.486	0.568	0.629	0.211	0			sp|P21560|CBP3_YEAST	Protein CBP3, mitochondrial OS=Saccharomyces
TRINITY_DN21932_c0_g1_i4	0	0.282	0.676	0.213	0	0.092	0.128	0.053	0.049	0.111	0.167	3.145	0.218	3.345	0.306	0.097	1.655	1.193	1.113	0
TRINITY_DN21936_c0_g1_i1	0.282	4.137	5.087	1.851	0.537	0.102	3.294	0.316	0.238	7.514	1.84	26.614	3.201	13.169	5.21	1.556	28.141	13.774	11.787	0.409			sp|Q9UTJ7|SDHA_SCHPO	Probable succinate dehydrogenase [ubiquinone]
TRINITY_DN21946_c0_g1_i1	0	0.397	0.621	0	0	0	0.236	0	0.066	0.628	0.753	7.773	0.124	7.807	0.421	0.639	5.407	2.34	2.246	0
TRINITY_DN21957_c0_g1_i1	0	0.591	1.01	0.359	0.164	0.051	0.364	0	0.123	0.268	1.119	8.274	0	6.642	0.709	0.528	4.016	2.766	2.899	0.062
TRINITY_DN21962_c0_g1_i4	0.041	1.385	0.074	0.465	0.208	0.236	0.737	0.123	0.049	0.988	0.282	3.095	0.756	3.173	1.465	0.611	2.694	1.924	2.121	0.174
TRINITY_DN21971_c0_g1_i3	0	0.406	1.13	0.523	0.12	0.256	0.393	0	0.164	1.828	0.251	4.978	0.756	3.154	0.737	0.597	4.839	2.248	0.854	0.037			sp|P47043|ZAP1_YEAST	Zinc-responsive transcriptional regulator
TRINITY_DN21973_c0_g1_i1	0	0.953	2.613	0.736	0.175	0.092	0.954	0.097	0.049	4.514	0.722	12.26	2.041	3.201	1.504	1.139	8.12	5.939	5.557	0.608		Serine_Peptidases	sp|P87177|YB1C_SCHPO	Uncharacterized WD repeat-containing protein
TRINITY_DN21983_c0_g1_i1	0.207	5.328	6.838	3.721	0.635	0.328	2.851	0.308	0.5	6.148	2.018	32.093	3.315	27.035	4.779	4.181	24.899	11.563	11.364	0.36			sp|Q10137|SEC14_SCHPO	Sec14 cytosolic factor OS=Schizosaccharomyces
TRINITY_DN21989_c0_g1_i1	0.248	0.476	1.019	0.136	0.361	0	0.688	0.097	0.205	1.837	0.23	8.644	0.653	5.476	1.331	0.639	5.642	3.321	4.406	0			sp|P53011|SEH1_YEAST	Nucleoporin SEH1 OS=Saccharomyces cerevisiae
TRINITY_DN21990_c0_g1_i2	0.091	12.085	11.637	3.052	0.92	0.779	5.614	0.527	0.836	15.286	2.844	53.007	11.499	45.239	9.576	2.514	29.944	20.619	24.466	0.285			sp|Q5BIN5|PIN1_BOVIN	Peptidyl-prolyl cis-trans isomerase NIMA-interacting
TRINITY_DN22002_c0_g1_i3	0.199	0.75	1.751	0	0.591	0	1.042	0.149	0.057	2.954	0.638	14.103	0.394	5.409	1.666	0	11.01	8.15	4.175	0			sp|Q92459|FDFT_USTMA	Squalene synthase OS=Ustilago maydis (strain
TRINITY_DN22005_c0_g1_i6	0.025	0.882	0.232	0	0.142	0.031	0	0.07	0.066	0.646	0.314	2.855	0.849	3.278	0.996	0.931	2.762	1.471	1.584	0.211			sp|P23955|MPPA_NEUCR	Mitochondrial-processing peptidase subunit
TRINITY_DN22042_c0_g1_i2	0	4.587	3.919	0.882	0	0	2.075	0.483	0	4.698	0	20.283	11.281	28.583	4.271	2.542	6.386	9.593	15.607	0.781
TRINITY_DN22048_c0_g1_i1	0	1.764	7.347	1.366	0.34	0.143	2.311	0.07	0.115	5.501	2.06	20.644	3.678	19.036	1.896	2.375	10.686	8.686	9.704	0.161
TRINITY_DN22048_c0_g1_i2	0	1.464	1.316	1.424	0.11	0	1.15	0.088	0.238	2.382	1.893	13.542	1.834	14.048	1.867	0.986	6.729	4.116	4.559	0
TRINITY_DN22057_c0_g1_i1	0.306	0	0.991	0.436	0.208	0.318	0.216	0	0	0.572	0	14.013	0.135	5.265	2.136	2.417	24.801	2.313	3.916	0.36			sp|Q4WI46|CRF2_ASPFU	Probable glycosidase crf2 OS=Neosartorya
TRINITY_DN22057_c0_g1_i2	0.422	1.323	5.244	6.308	0.887	0.769	3.451	0.369	0.82	1.172	8.125	26.604	2.258	44.675	4.74	12.433	22.137	7.104	10.193	1.513			sp|Q4WI46|CRF2_ASPFU	Probable glycosidase crf2 OS=Neosartorya
TRINITY_DN22058_c0_g1_i3	0.174	9.024	5.355	2.422	0.318	0.369	3.815	0.835	1.262	5.695	4.559	44.062	4.351	53.859	2.978	2.431	27.348	14.329	17.978	0.136			sp|Q4PFA5|UBC2_USTMA	Ubiquitin-conjugating enzyme E2 2 OS=Ustilago
TRINITY_DN22067_c0_g2_i1	0.041	1.156	1.603	0.31	0.033	0.184	1.563	0.114	0.238	1.883	1.454	9.976	1.088	8.897	2.001	0.583	8.708	4.403	4.118	0.099			sp|Q6GQ62|PLPP5_XENLA	Phospholipid phosphatase 5 OS=Xenopus laevis
TRINITY_DN22076_c0_g1_i2	0	2.232	1.158	0.136	0.131	0.205	0.649	0.123	0	1.68	0.471	7.743	1.14	5.638	1.044	1.111	3.644	2.562	1.401	0.149
TRINITY_DN22076_c0_g2_i2	0	0	0	0	0	0.215	0	0.105	0.188	0.148	0.272	6.12	0.093	13.732	0.661	1.625	0.98	1.323	1.766	0			sp|O13805|YE08_SCHPO	Uncharacterized mitochondrial carrier C17H9.08
TRINITY_DN22091_c0_g1_i2	0	0.291	0	0	0	0	0	0	0	0	0	5.669	0	2.016	0.326	0.333	1.244	0.611	1.728	0			sp|J9VY90|LAC1_CRYNH	Laccase-1 OS=Cryptococcus neoformans var.
TRINITY_DN22121_c0_g1_i2	0.265	10.25	12.601	2.994	0.734	0.277	5.113	0.633	0.901	17.243	3.44	63.625	7.656	41.015	8.274	4.293	41.061	27.103	33.009	0.533			sp|Q9USP8|IDH2_SCHPO	Isocitrate dehydrogenase [NAD] subunit 2,
TRINITY_DN22143_c0_g1_i1	0	0.265	0.695	0	0	0	0	0	0.172	0.185	0.701	1.623	0	4.797	0.843	0.375	1.832	1.36	0.893	0
TRINITY_DN22146_c0_g1_i1	0	0.203	0	0	0	0	0.157	0	0	0.277	0.356	2.925	0	2.246	0.067	0.278	1.205	1.092	0.192	0
TRINITY_DN22180_c0_g1_i2	0	2.39	3.697	0.998	0.318	0.143	2.212	0.176	0.205	3.951	0.732	15.526	3.937	14.717	2.969	0.361	13.135	7.928	6.46	0.397			sp|Q4V7N3|STYXA_XENLA	Serine/threonine/tyrosine-interacting protein
TRINITY_DN22181_c0_g1_i1	0	0.379	0.889	0.291	0.044	0	0.482	0.114	0.082	1.883	0.167	8.023	0.559	3.326	0.967	0.097	6.063	3.524	2.726	0.074
TRINITY_DN22199_c0_g1_i2	0.563	7.524	20.847	5.736	1.194	0.482	6.42	0.422	0.443	26.704	2.782	68.923	22.252	24.846	11.291	4.598	33.254	30.655	38.71	1.401			sp|P38988|GGC1_YEAST	Mitochondrial GTP/GDP carrier protein 1
TRINITY_DN22205_c0_g1_i1	0.033	1.42	2.52	0.407	0.153	0.133	1.278	0.141	0.041	2.862	0.711	11.759	1.43	7.186	1.216	0.75	8.394	4.486	6.565	0.112			sp|O75001|MCM7_SCHPO	DNA replication licensing factor mcm7 OS=Schizosaccharomyces
TRINITY_DN22206_c0_g1_i2	0.133	0	0	0	0	0	0.511	0	0	1.135	0	4.067	0.725	0.803	0.814	0	3.546	0.453	1.555	0
TRINITY_DN22221_c0_g1_i1	0	0.714	2.678	0	0	0	1.101	0	0.221	3.692	2.583	43.141	0.259	35.654	1.81	0.986	36.193	14.356	11.537	0
TRINITY_DN22232_c0_g1_i3	0	0.697	1.418	0.833	0	0.707	1.111	0.58	0.213	0.96	0.669	13.622	0	11.974	2.011	2.792	5.495	3.043	4.319	0
TRINITY_DN22238_c0_g1_i1	0.033	1.05	0.954	0.262	0.11	0	0.433	0.132	0.082	1.569	0.084	2.494	0.487	2.867	1.714	0.445	4.496	2.784	1.555	0.074			sp|Q9UVG5|PRM10_PICSO	Pheromone-regulated membrane protein 10
TRINITY_DN22239_c0_g1_i2	0.108	1.852	2.631	0.329	0.11	0.113	0.836	0.07	0.098	3.092	0.345	10.337	2.403	7.922	1.599	2.056	6.132	4.653	4.358	0.248
TRINITY_DN22247_c0_g1_i1	0	0.423	2.817	0.707	0	0	1.691	0.264	0	2.215	0.408	13.983	1.14	6.89	3.467	0.458	12.499	6.457	6.354	0			sp|P33282|URIC_EMENI	Uricase OS=Emericella nidulans (strain FGSC
TRINITY_DN22252_c0_g1_i1	0.099	0	0.195	0	0.131	0	0.374	0.132	0.09	0.249	0.491	5.249	0.445	3.851	0.201	0.5	2.449	1.554	1.123	0.298
TRINITY_DN22254_c0_g1_i2	0.066	2.443	2.085	0	0	0	0.678	0	0.205	2.465	3.723	25.211	0.746	21.186	1.044	2.945	17.151	8.02	8.13	0.074
TRINITY_DN22255_c0_g1_i1	0.066	0.415	0.713	0.194	0.12	0	0.374	0.026	0.098	0.96	0.167	5.549	0.425	2.16	0.555	0.306	3.546	2.581	2.092	0.112
TRINITY_DN22257_c0_g1_i8	0	1.447	0	0.649	0	0	1.249	0	0	0.766	1.025	10.477	0	11.592	1.465	1.347	1.812	5.282	1.718	0.397
TRINITY_DN22259_c0_g1_i4	0.083	3.317	1.001	0.911	0.427	0.246	1.75	0	0.148	4.975	0.22	21.345	2.662	12.108	0.297	1.987	4.643	7.141	7.391	0.372			sp|O94413|KPR2_SCHPO	Ribose-phosphate pyrophosphokinase 2 OS=Schizosaccharomyces
TRINITY_DN22278_c0_g1_i2	0	0.935	2.4	0.572	0.142	0.154	1.082	0.141	0	2.123	0.408	10.237	1.875	6.345	0.977	0.667	5.926	4.052	2.966	0.087
TRINITY_DN22280_c0_g1_i1	0.207	8.265	9.191	2.306	0.821	0.635	4.444	0.439	0.279	14.151	2.959	45.465	10.919	31.364	6.34	4.209	26.408	16.558	19.993	0.236			sp|O14018|SYSC_SCHPO	Serine--tRNA ligase, cytoplasmic OS=Schizosaccharomyces
TRINITY_DN22280_c0_g1_i2	0	0.203	0	0	0	0	0.246	0	0	0.471	0.376	2.995	0.456	3.306	0.45	0.556	0.764	0.518	1.248	0
TRINITY_DN22287_c0_g1_i1	0	0.221	0	0	0	0	0.128	0	0.221	0.12	0.146	1.533	0.238	2.876	0.469	0	0.676	0.657	0.96	0
TRINITY_DN22288_c0_g1_i1	0.058	2.152	4.123	0.891	0.077	0.174	1.406	0.255	0.205	4.818	0.962	21.095	2.134	8.104	2.796	0.82	12.312	8.51	8.13	0.26
TRINITY_DN22294_c0_g1_i1	0.24	14.598	21.968	5.562	1.457	0.666	6.234	0.624	1.082	22.274	6.065	79.03	20.512	53.314	13.474	7.432	43.814	30.369	39.613	0.967			sp|Q9P7X0|DHSD_SCHPO	Succinate dehydrogenase [ubiquinone] cytochrome
TRINITY_DN22294_c0_g1_i2	0	0	0	0.174	0	0.174	0	0	0	0.342	0.366	1.382	0.135	1.166	0.163	0.445	0.715	0.241	0.787	0			sp|Q9P7X0|DHSD_SCHPO	Succinate dehydrogenase [ubiquinone] cytochrome
TRINITY_DN22297_c0_g1_i3	0.215	2.002	1.575	0.95	0.372	0	1.789	0.185	0.459	3.249	1.694	17.95	1.658	16.399	2.49	0.82	13.155	7.65	6.844	0.087			sp|Q4I2D7|CAPZA_GIBZE	F-actin-capping protein subunit alpha OS=Gibberella
TRINITY_DN22298_c0_g1_i1	0	2.073	0.88	0.494	0	0	1.023	0.158	0.115	2.271	0.711	14.654	1.347	9.766	1.781	0	6.651	4.264	3.235	0.149			sp|Q4P101|SSN8_USTMA	RNA polymerase II holoenzyme cyclin-like
TRINITY_DN22299_c0_g1_i1	0	0.106	0.074	0	0	0	0.059	0	0	0.332	0.282	1.442	0	1.3	0	0	0.646	0.185	0.077	0
TRINITY_DN22306_c0_g1_i1	0.737	1.288	1.251	0	0.055	0	0.924	0	0	1.357	2.217	19.061	0.632	14.669	1.705	1.153	15.751	4.616	6.872	0.26
TRINITY_DN22306_c0_g1_i2	0	1.217	0.315	0.572	0	0.41	0	0.088	0.557	0.683	1.098	5.249	1.979	16.647	1.398	2.431	1.097	1.24	1.017	0.347
TRINITY_DN22311_c0_g1_i1	0	0.441	0.519	0.31	0.033	0	0.256	0	0.057	1.228	0.188	3.406	0.197	2.399	0.67	0.403	3.418	1.933	1.517	0			sp|Q4PHA8|BRO1_USTMA	Vacuolar protein-sorting protein BRO1 OS=Ustilago
TRINITY_DN22318_c0_g1_i1	0	0	0	0	0	0	0	0	0	0.065	0.314	3.105	0.083	5.476	0	0.875	1.783	1.369	1.075	0
TRINITY_DN22323_c0_g1_i1	0	0.803	1.408	0.194	0.208	0.051	0.541	0.026	0.066	2.566	0.251	6.33	1.222	3.842	1.006	0.417	3.428	3.108	2.736	0.074			sp|Q10105|GCN1_SCHPO	eIF-2-alpha kinase activator gcn1 OS=Schizosaccharomyces
TRINITY_DN22325_c0_g1_i1	0	0	0	0.097	0	0.215	0.246	0.088	0	0.702	0.167	2.775	0.539	2.217	0.441	0.445	1.508	0.426	0.403	0.074			sp|B0BN95|HARB1_RAT	Putative nuclease HARBI1 OS=Rattus norvegicus
TRINITY_DN22325_c1_g1_i1	0	0	0.204	0	0	0	0.452	0	0.074	0.332	0	2.134	0.497	0.879	0.249	0	2.272	0.648	0.893	0.149			sp|Q94K49|ALP1_ARATH	Protein ANTAGONIST OF LIKE HETEROCHROMATIN
TRINITY_DN22337_c0_g1_i1	1.524	44.88	7.014	3.043	1.413	1.23	3.687	1.274	1.377	11.898	3.629	18.561	8.971	100.599	11.846	5.64	13.018	13.718	10.616	0.93
TRINITY_DN22341_c0_g1_i1	0	9.121	5.43	0.94	0.252	0.379	2.389	0.369	0.721	3.637	1.955	22.898	6.288	32.501	3.965	3.098	11.666	6.29	8.571	1.277
TRINITY_DN22343_c0_g1_i2	0	0.194	0.065	0	0	0	0.059	0.053	0.049	0.102	0	1.092	0.135	2.246	0.048	0	1.283	0.685	0.49	0
TRINITY_DN22345_c0_g1_i2	0	0	0	0	0	0	0	0	0	0.323	0	0.551	0	0.927	0	0.639	0.813	0.25	0.298	0.322
TRINITY_DN22345_c0_g1_i4	0.456	11.635	11.146	4.215	1.26	1.148	7.384	1.257	0.148	14.908	4.591	32.133	11.654	34.087	12.957	4.029	20.932	21.1	14.465	0.471
TRINITY_DN22346_c0_g1_i1	0	0.15	0.102	0.078	0.088	0.041	0.383	0.026	0.098	0.683	0.429	1.573	0.176	2.867	0.278	0.056	0.774	0.786	0.835	0
TRINITY_DN22348_c0_g1_i1	0	1.041	0.593	0.155	0	0	0.246	0.035	0.033	0.914	0.272	7.402	0.031	5.915	0.45	0.167	8.189	2.572	2.102	0			sp|Q10274|TEB1_SCHPO	Telobox protein 1 OS=Schizosaccharomyces
TRINITY_DN22351_c0_g1_i1	0.05	0.115	0.195	0.203	0	0	0.501	0.026	0.107	0.212	1.025	9.656	0.021	9.719	0.603	1.486	13.723	2.155	2.064	0
TRINITY_DN22372_c0_g1_i2	0	1.711	4.938	1.899	0.197	0	1.937	0.202	0.131	5.991	0.837	21.986	4.31	7.645	2.356	0.472	11.421	8.335	11.825	0.422			sp|Q54CP1|RRP8_DICDI	Ribosomal RNA-processing protein 8 OS=Dictyostelium
TRINITY_DN22380_c0_g1_i1	0	0.141	1.733	0.601	0.033	0.061	0.6	0.035	0.098	1.754	0.23	6.821	0.197	2.991	1.12	0.514	6.21	2.433	3.014	0
TRINITY_DN22392_c0_g1_i2	0	0.732	0.5	0.281	0	0	0.285	0	0	0	1.025	1.863	3.553	5.59	1.044	3.292	0	0.768	0.835	0.695
TRINITY_DN22402_c0_g1_i3	0.19	0.706	0	0.174	0.559	0.154	0	0.615	1.033	0	0.136	0	0	0	0	0	0	0	0	0
TRINITY_DN22406_c0_g1_i2	0	0.635	1.381	0.184	0	0	0.364	0.07	0.041	1.172	0.418	3.626	0.394	2.819	0.718	0.681	4.006	2.479	3.004	0.087			sp|P08770|TRA1_MAIZE	Putative AC transposase OS=Zea mays PE=2
TRINITY_DN22422_c0_g1_i1	0	0	0	0	0	0	0	0	0	0.157	0.335	0.851	0.238	0.354	0.316	0	0.157	0.583	0.336	0			sp|Q6BZQ6|BOS1_YARLI	Protein transport protein BOS1 OS=Yarrowia
TRINITY_DN22422_c0_g1_i2	0	1.385	0.973	0.707	0.142	0.072	0.6	0.044	0.254	2.262	0.554	9.245	1.264	6.938	0.613	0.931	6.318	3.423	3.599	0.248			sp|Q9P7G5|BOS1_SCHPO	Protein transport protein bos1 OS=Schizosaccharomyces
TRINITY_DN22427_c0_g1_i2	0	0.238	1.418	0.271	0.066	0.236	0.58	0.149	0	2.806	0.251	6.811	2.124	1.73	1.369	0.181	4.378	4.653	3.763	0			sp|Q9FVW4|RENT3_ARATH	Regulator of nonsense transcripts UPF3
TRINITY_DN22427_c0_g1_i4	0.34	1.455	1.158	0.407	0.438	0	0.216	0	0.148	1.043	0.805	11.198	0.984	9.375	1.494	1.222	2.204	0	2.064	0.26
TRINITY_DN22432_c0_g1_i1	0.05	0.565	0.704	0.184	0.066	0.164	0.649	0.035	0.057	1.486	0.491	7.082	0.622	5.065	0.948	0.403	4.085	2.081	1.565	0.124
TRINITY_DN22439_c0_g1_i1	0.058	1.649	2.372	0.533	0.077	0.031	1.396	0.114	0.164	2.843	1.255	17.298	0.746	13.685	1.733	0.986	15.016	7.872	6.815	0.074			sp|Q01373|FOX2_NEUCR	Peroxisomal hydratase-dehydrogenase-epimerase
TRINITY_DN22454_c0_g1_i2	0	0.035	0.204	0.087	0	0	0	0	0	0.277	0.199	1.523	0.104	0.478	0	0.083	0.744	0.527	0.758	0			sp|P32449|AROG_YEAST	Phospho-2-dehydro-3-deoxyheptonate aldolase,
TRINITY_DN22462_c0_g1_i1	0.298	2.399	3.845	0.465	0.197	0.123	1.396	0.149	0.213	4.597	0.722	13.342	3.17	9.585	2.356	0.931	8.551	6.124	6.959	0.484			sp|Q8BMZ5|SEN34_MOUSE	tRNA-splicing endonuclease subunit Sen34
TRINITY_DN22465_c0_g1_i1	0	1.57	1.52	0.136	0.197	0	1.032	0	0.205	2.077	1.558	17.549	0.363	16.943	1.456	1.973	17.416	6.244	4.646	0
TRINITY_DN22483_c0_g1_i1	0.323	4.111	4.735	1.143	0.591	0	2.399	0	0.434	5.52	3.033	21.335	3.574	25.171	3.495	2.834	15.976	13.903	13.438	0.657
TRINITY_DN22497_c0_g1_i1	0	0.221	0.056	0.155	0.044	0.154	0.403	0	0	0.637	0.23	1.833	0.559	0.573	0.134	0.097	0.313	0.204	0.192	0.335
TRINITY_DN22517_c0_g1_i3	0	1.482	5.809	1.512	0.175	0.092	1.868	0.272	0.082	5.298	1.349	27.846	3.843	21.052	4.731	3.098	16.044	8.686	9.982	0.595			sp|P32573|SPS19_YEAST	Peroxisomal 2,4-dienoyl-CoA reductase SPS19
TRINITY_DN22528_c0_g1_i2	0.406	8.15	10.303	1.851	0.734	0.277	3.559	0.615	0.328	11.261	2.52	41.528	9.323	28.965	6.866	2.626	15.751	12.442	18.007	0.943			sp|Q04598|RM34_YEAST	54S ribosomal protein L34, mitochondrial
TRINITY_DN2255_c0_g1_i1	0	0.141	0.278	0	0	0	0.079	0	0	0.822	0.094	2.885	0.249	1.453	0.22	0.153	0.774	0.583	1.219	0
TRINITY_DN22592_c0_g1_i2	0	0.812	0.482	0.194	0	0.143	0.226	0.062	0.057	0.812	0.554	4.367	0.477	4.597	1.255	0	2.243	1.369	1.565	0
TRINITY_DN22614_c0_g1_i1	0	0	0	0	0	0	0.757	0	0	0.415	0.857	3.606	0.28	5.16	0	0	4.711	1.536	1.785	0
TRINITY_DN22617_c0_g1_i1	0	5.989	11.619	2.374	1.457	0.646	4.887	0.457	0.254	13.892	2.374	44.353	9.52	26.671	8.983	2.653	29.963	20.637	23.516	0.819			sp|Q19749|ODP2_CAEEL	Dihydrolipoyllysine-residue acetyltransferase
TRINITY_DN22628_c0_g1_i2	0.149	1.27	2.113	0.804	0.099	0	0.905	0.193	0.541	1.385	1.328	11.068	0.881	15.252	1.034	0.653	7.493	3.478	1.92	0.087			sp|Q6F4M7|NPCC_RHOOP	Hydroxyquinol 1,2-dioxygenase OS=Rhodococcus
TRINITY_DN22629_c0_g1_i1	0.083	1.597	1.538	1.134	0.164	0.41	1.013	0.158	0.238	3.646	1.349	17.779	1.461	12.05	2.701	0.834	15.555	8.251	7.64	0.087
TRINITY_DN22635_c0_g1_i1	0	5.169	4.92	1.095	0.515	0.174	2.33	0.325	0.254	5.686	1.778	23.439	3.294	22.065	3.476	1.667	12.753	9.593	12.737	0.198			sp|Q5RFD3|PSME3_PONAB	Proteasome activator complex subunit 3
TRINITY_DN22646_c0_g1_i1	0	0.168	1.621	2.326	0.296	0.482	0.374	0.062	0.246	0.378	1.391	9.395	1.264	7.645	1.647	2.903	1.832	1.795	2.38	0.558			sp|P0C958|PLB3_ASPFU	Lysophospholipase 3 OS=Neosartorya fumigata
TRINITY_DN22725_c0_g1_i1	0	0	0	0.058	0.033	0	0.216	0	0.025	0.028	0.45	0.631	0.052	1.5	0.029	0.278	0.725	0.583	0.134	0
TRINITY_DN22743_c0_g1_i1	0	0	0	0	0	0	0	0	0	0.249	0	1.152	0	1.51	0.249	0	0.255	0.25	0	0			sp|Q6C1T4|IPYR_YARLI	Inorganic pyrophosphatase OS=Yarrowia lipolytica
TRINITY_DN22743_c0_g1_i2	0.588	31.931	48.134	7.18	2.475	0.994	14.325	0.809	1.451	47.307	11.837	197.405	27.142	141.843	28.576	15.559	104.406	68.508	82.354	2.642			sp|Q6C1T4|IPYR_YARLI	Inorganic pyrophosphatase OS=Yarrowia lipolytica
TRINITY_DN22754_c0_g1_i3	0	0	0.324	0	0	0	0	0	0	0.323	2.426	6.601	0	2.055	0	0	1.117	1.397	2.38	0
TRINITY_DN22775_c0_g1_i1	0	0.282	0.426	0.058	0	0	0.108	0.053	0.09	0.489	1.725	4.818	0.332	4.816	0.048	0.597	1.567	1.036	1.67	0
TRINITY_DN22775_c0_g2_i3	0	0	0.612	0	0	0	0	0	0	0.268	2.552	3.886	1.005	13.761	1.101	4.265	1.508	1.332	1.296	0
TRINITY_DN22777_c0_g1_i2	0	2.558	3.197	0.775	0.537	0.297	1.101	0.114	0.066	4.255	0	13.071	1.668	9.25	2.069	1.806	9.119	6.124	6.162	0.335
TRINITY_DN22891_c0_g1_i1	0	0.3	0.204	0.174	0.131	0.133	0.128	0	0	0.24	0.607	1.132	0.218	1.147	0.115	1.222	0.823	0.49	0.432	0
TRINITY_DN22962_c1_g1_i1	0	0.282	0.111	0	0	0	0.098	0	0	0.258	0.22	0.982	0.145	0.535	0.124	0.181	0.637	0.379	0.288	0
TRINITY_DN22973_c0_g1_i4	0	22.096	18.485	4.467	1.117	1.127	8.986	0.369	1.172	15.157	11.022	78.299	20.999	100.455	16.29	8.099	30.698	30.165	47.714	2.208
TRINITY_DN22992_c0_g1_i2	0	0	0.046	0.136	0	0	0.128	0	0	0.12	0.397	0.781	0	1.061	0.239	0.167	0.901	0.435	0.269	0
TRINITY_DN23010_c0_g1_i1	0	0.626	1.927	0	0	0	0.737	0	0.107	2.243	1.955	15.505	0.373	9.566	2.001	1.556	12.068	5.828	3.014	0
TRINITY_DN23010_c0_g2_i1	0	0.088	0.704	0.107	0.296	0	0.413	0.193	0.262	0.286	1.297	2.714	0.891	2.322	1.13	0.194	2.057	1.573	1.277	0
TRINITY_DN23031_c0_g1_i1	0	0.079	0.111	0	0.088	0	0.098	0	0.082	1.052	0	1.643	0.59	0.621	0.172	0.181	0.607	0.583	1.315	0.161
TRINITY_DN23040_c0_g1_i1	0	0	0.102	0	0	0	0.059	0	0	0.406	0.105	0.982	0.052	1.023	0	0.5	0.676	0.407	0.336	0
TRINITY_DN23045_c0_g1_i1	0.182	2.285	3.456	0.911	0.241	0	1.878	0.114	0.492	5.658	1.548	17.719	5.19	14.764	2.643	1.792	11.313	8.446	9.426	0
TRINITY_DN23047_c0_g1_i1	0	0.044	0	0.097	0	0	0.079	0	0	0.065	0	1.202	0	0.736	0	0.181	2.282	0.379	0.278	0			sp|P0C1B1|CBK1_EMENI	Serine/threonine-protein kinase cbk1 OS=Emericella
TRINITY_DN23048_c0_g1_i1	0	0.3	0.584	0	0	0	0.728	0	0.131	0.628	2.091	12.44	0.197	9.069	0.259	0.472	7.523	2.433	2.975	0
TRINITY_DN23048_c0_g1_i2	0	0	0	0	0	0	0	0	0	0	0	0.851	0	1.844	0	0	0.431	1.119	0.442	0
TRINITY_DN23056_c0_g1_i1	0	0.079	4.531	1.889	0.887	0.82	2.596	0	0	8.141	2.123	29.378	8.795	4.348	3.122	1.542	5.936	2.766	8.552	1.067
TRINITY_DN23057_c0_g1_i1	0.116	2.196	7.023	1.764	0.756	0.174	2.782	0.325	0.205	11.132	0.952	28.246	5.946	12.987	4.989	3.015	18.885	12.229	12.891	0.521			sp|Q9P7E3|DCAM_SCHPO	S-adenosylmethionine decarboxylase proenzyme
TRINITY_DN23065_c0_g1_i2	0	0.132	0.889	0.203	0.383	0.061	0.551	0.114	0.139	1.255	0.648	4.778	1.026	2.953	0.68	0.528	3.291	2.044	2.592	0.136
TRINITY_DN23066_c0_g1_i1	0	0.556	0.686	0.116	0.055	0	1.091	0	0.229	1.957	0.282	11.599	0.891	4.004	1.36	0	8.238	3.95	3.148	0.099
TRINITY_DN23068_c0_g1_i1	0	0.468	0.361	0.194	0.088	0	0.187	0.088	0.025	0.683	0.22	3.876	0.549	5.237	0.603	0.181	3.908	1.378	1.449	0			sp|Q9SS40|PT310_ARATH	Probable sugar phosphate/phosphate translocator
TRINITY_DN23074_c0_g1_i2	0.075	1.87	1.668	0.552	0.044	0	0.806	0	0	1.948	1.558	20.173	1.305	15.844	1.044	0.931	9.394	5.134	5.557	0.087
TRINITY_DN23082_c0_g1_i2	0.348	22.211	24.127	3.992	1.402	0	11.877	0.756	1.041	25.006	6.211	114.308	17.735	85.175	18.186	7.835	70.104	43.365	49.652	1.873		Threonine_Peptidases=AAS50194	sp|Q55GJ6|PSB6_DICDI	Proteasome subunit beta type-6 OS=Dictyostelium
TRINITY_DN23084_c0_g1_i1	0	0.406	0.723	0.165	0.011	0.02	0.197	0.026	0.025	0.572	0.125	3.456	0.249	1.615	0.508	0.125	2.223	1.295	3.283	0
TRINITY_DN23085_c0_g1_i1	0	1.226	1.668	0.62	0.208	0.061	0.885	0.044	0.041	1.32	0.502	8.003	0.901	4.979	1.312	0.778	5.789	2.96	2.4	0.112
TRINITY_DN23087_c0_g2_i1	0.083	1.253	0.602	0.136	0.066	0.072	0.383	0.035	0.041	0.914	0.397	4.097	0.466	3.861	0.498	0.292	2.909	2.017	1.373	0.037			sp|Q42510|GNOM_ARATH	ARF guanine-nucleotide exchange factor GNOM
TRINITY_DN23095_c0_g1_i1	0	0.512	0.88	0.252	0.066	0.154	0.875	0	0.033	1.911	0.722	10.287	0.974	7.655	0.891	1.111	5.123	1.98	3.206	0.062
TRINITY_DN23096_c0_g1_i2	0	0	0	0	0.066	0	0	0	0	0.738	0	3.255	0	1.233	0.479	0	1.744	1.415	1.373	0			sp|P17885|BIMA_EMENI	Protein bimA OS=Emericella nidulans (strain
TRINITY_DN23098_c0_g1_i1	0.199	11.035	12.128	1.986	1.566	0.553	4.887	0.475	0.59	19.292	4.538	90.719	12.473	54.662	7.968	2.862	34.939	28.112	33.258	0.769
TRINITY_DN23104_c0_g1_i1	0.05	1.597	1.26	0.174	0.131	0	0.433	0.062	0.057	1.975	0.324	6.501	0.86	4.759	1.13	0.069	4.966	3.025	3.071	0.236			sp|Q8RWT8|SYSM_ARATH	Serine--tRNA ligase, chloroplastic/mitochondrial
TRINITY_DN23111_c0_g1_i2	0.124	2.055	5.615	0.901	0.318	0	1.858	0.079	0.156	7.901	0.481	21.545	4.91	5.705	1.772	0.667	12.009	8.742	11.355	0.223			sp|O13982|YEC8_SCHPO	Uncharacterized WD repeat-containing protein
TRINITY_DN23119_c0_g1_i1	0	0.847	2.335	0.339	0.208	0	1.062	0.114	0.107	4.274	0.533	17.389	0.549	4.702	1.657	0.625	19.62	6.235	6.824	0
TRINITY_DN23122_c0_g1_i2	0.215	2.567	2.075	0.795	0.778	0.543	1.2	0.272	0.443	2.132	1.056	11.96	1.43	11.391	1.571	0.681	9.531	4.616	4.051	0.372
TRINITY_DN23123_c0_g1_i1	0	0.273	0.565	0.203	0.033	0	0.403	0.026	0.025	0.803	0.094	3.616	0.363	1.844	0.651	0.111	3.056	1.758	2.073	0
TRINITY_DN23139_c0_g1_i2	0.033	0.609	1.075	0.543	0.044	0.154	0.875	0.079	0.172	2.058	0.711	9.766	0.642	5.686	1.398	0	7.043	3.201	3.033	0.037
TRINITY_DN23141_c0_g1_i1	0	0.988	4.049	3.827	0.537	0	2.674	0	0.107	8.861	2.081	34.367	4.631	6.881	4.788	4.001	7.719	5.217	10.798	0.843
TRINITY_DN23141_c0_g1_i2	0	0.132	0.936	0.61	0	0.42	1.239	0	0.09	3.037	1.297	9.866	1.916	0.755	1.436	0.875	3.497	1.961	3.215	0
TRINITY_DN23145_c0_g1_i1	0	0.891	1.242	0.436	0.055	0	0.433	0.053	0	1.375	0.376	7.122	1.243	5.743	1.331	0.5	4.418	3.034	2.083	0
TRINITY_DN23147_c0_g1_i3	0.762	6.413	31.623	8.633	2.048	0.922	5.024	0.167	2.819	16.135	9.641	76.756	9.707	31.058	18.08	15.336	56.322	47.491	46.562	2.208
TRINITY_DN23150_c0_g1_i1	0	0.538	0.936	0.3	0.099	0.051	0.393	0.026	0.082	1.495	0.335	5.519	0.342	3.01	1.101	0.736	4.006	2.072	1.699	0.161
TRINITY_DN23151_c0_g1_i2	0	0.503	0.565	0.455	0.044	0	0.226	0.044	0.115	0.803	0.303	4.437	0.332	2.217	0.287	0.333	1.097	0.999	0.777	0.074
TRINITY_DN23152_c0_g1_i2	0	0.079	0.519	0.223	0.219	0	0.521	0.07	0	1.08	0	5.179	0.062	0.277	0.182	0	5.074	2.146	2.947	0.087			sp|O60182|RFC1_SCHPO	Replication factor C subunit 1 OS=Schizosaccharomyces
TRINITY_DN23154_c0_g1_i1	0	1.164	1.76	0.494	0.186	0	0.492	0.088	0.164	0.997	1.223	13.242	1.43	12.003	1.235	1.07	7.111	4.625	6.354	0
TRINITY_DN23166_c0_g1_i2	0.133	0.829	0.788	0.097	0.044	0	0.57	0.044	0	1.92	0.701	6.461	0.849	3.201	0.335	0.264	3.183	1.591	1.996	0.074			sp|Q9P7V4|KTI12_SCHPO	Protein kti12 OS=Schizosaccharomyces pombe
TRINITY_DN23177_c0_g1_i2	0	0	0.167	0	0	0	0	0	0	0.332	0.22	2.033	0	0.268	0	0	1.254	0.999	0.739	0			sp|P95459|CSPA_PSEAE	Major cold shock protein CspA OS=Pseudomonas
TRINITY_DN23180_c0_g1_i2	0	0.115	0.25	0.087	0	0	0.088	0.018	0	0.388	0.052	1.512	0.031	0.22	0.239	0	2.929	0.749	0.538	0
TRINITY_DN23192_c0_g1_i1	0	0	0	0	0	0	0	0	0	1.182	0	3.536	0	4.692	1.149	0	4.251	2.313	2.563	0			sp|P87229|YC03_SCHPO	Uncharacterized protein C4G3.03 OS=Schizosaccharomyces
TRINITY_DN23198_c0_g1_i1	0.05	0.476	3.558	1.357	0.175	0	1.445	0.132	0.033	6.785	0.408	16.758	0.849	4.749	4.233	1.556	13.762	8.066	5.644	0.484
TRINITY_DN23198_c0_g1_i2	0.166	2.726	6.504	2.684	0.427	1.25	1.907	0.431	0.295	5.741	2.259	26.103	7.221	26.022	6.464	5.293	1.988	6.346	8.303	1.538
TRINITY_DN23202_c0_g1_i1	0	0.273	0.574	0.087	0.219	0	0.413	0.079	0	0.738	0.052	3.295	0.083	2.37	0.536	0.083	1.753	1.064	1.689	0.074
TRINITY_DN23205_c0_g1_i2	0	0	0	0.203	0.044	0	0	0	0.107	0	0.073	3.285	0.041	0	0.22	0.528	0.882	0.629	0	0.136
TRINITY_DN23207_c0_g1_i1	0.066	2.452	2.279	0.407	0.208	0.266	1.288	0.202	0.115	3.102	0.711	12.761	1.264	10.607	1.685	0.57	8.463	5.291	3.667	0.149		Serine_Peptidases	sp|P36408|GBB_DICDI	Guanine nucleotide-binding protein subunit
TRINITY_DN23236_c0_g1_i1	0	0.238	0.13	0.058	0	0	0.059	0	0	0.194	0.063	1.633	0.135	1.424	0.153	0.208	0.46	0.611	0.883	0
TRINITY_DN23269_c0_g1_i2	0	0.062	0	0	0	0	0.383	0	0.131	1.32	0.784	14.294	0.28	7.769	0.622	1.403	8.15	3.386	3.503	0
TRINITY_DN23276_c0_g1_i1	0	0.15	0.639	0	0.044	0.123	0.177	0.035	0.074	0.535	0.293	2.384	1.481	2.093	0.891	0.32	0.891	1.471	2.121	0.074
TRINITY_DN23277_c0_g1_i3	1.209	34.225	46.179	8.391	2.968	1.137	16.272	1.643	1.647	44.584	11.189	180.517	40.06	148.131	26.096	14.017	92.799	59.84	81.116	2.158			sp|P39825|PROF_SCHPO	Profilin OS=Schizosaccharomyces pombe (strain
TRINITY_DN23295_c0_g2_i1	0.447	10.806	7.857	1.289	0.263	0.061	3.658	0.606	0.918	8.141	3.325	47.408	4.278	51.269	6.263	4.334	33.059	17.196	19.341	0.769			sp|P70584|ACDSB_RAT	Short/branched chain specific acyl-CoA dehydrogenase,
TRINITY_DN23317_c0_g1_i1	0	0.732	0	0.087	0.044	0	0	0	0	1.182	0.68	3.275	1.295	2.427	0.297	0	1.205	2.155	1.804	0
TRINITY_DN23325_c0_g1_i3	0	0.265	0	0	0	0.174	0.187	0.053	0	0.388	0.554	1.973	0.342	2.962	0.182	0	0	0.12	0.384	0.099
TRINITY_DN23329_c0_g1_i2	2.915	209.777	225.335	52.799	21.149	5.503	79.885	10.098	6.712	250.622	64.489	849.557	243.291	590.959	114.946	70.598	302.15	255.012	380.038	13.606			sp|Q9M3D2|RL353_ARATH	60S ribosomal protein L35-3 OS=Arabidopsis
TRINITY_DN23329_c0_g1_i3	0	0.353	0.667	0.233	0	0.174	0.433	0	0.09	0.812	0.742	3.386	0.829	2.552	0.306	0.181	0.931	1.434	1.488	0.322			sp|O80626|RL352_ARATH	60S ribosomal protein L35-2 OS=Arabidopsis
TRINITY_DN23331_c0_g1_i1	0	0.088	0.093	0.048	0	0	0.049	0.018	0.025	0.332	0.021	0.621	0.01	0.344	0.057	0.056	0.735	0.379	0.538	0			sp|Q92269|NRFA_PENUR	Nitrogen regulatory protein nrfA OS=Penicillium
TRINITY_DN23333_c0_g1_i1	0	2.214	1.853	0.785	0.044	0.215	1.023	0.132	0.082	4.172	1.046	11.038	2.155	7.072	1.791	1.695	5.838	4.126	4.78	0			sp|P38812|GEP4_YEAST	Phosphatidylglycerophosphatase GEP4, mitochondrial
TRINITY_DN23336_c0_g1_i2	0.588	10.206	15.353	3.575	0.92	0	5.742	0.694	0.811	16.098	3.033	65.718	11.085	50.562	10.525	8.474	43.99	24.467	26.444	0.905			sp|Q9FZ48|UBC36_ARATH	Ubiquitin-conjugating enzyme E2 36 OS=Arabidopsis
TRINITY_DN23341_c0_g1_i1	0.207	1.552	3.604	1.337	0.088	0.102	2.153	0.325	0.213	3.941	1.056	20.153	1.264	14.506	3.045	1.459	19.385	11.091	11.508	0.124
TRINITY_DN23348_c0_g1_i1	0	0.026	0.065	0.116	0	0.082	0	0	0	0.028	0.063	2.043	0.031	2.141	0.23	0	1.362	0.398	0.211	0
TRINITY_DN23354_c0_g1_i2	0	0.759	1.223	0.707	0.099	0	1.2	0.158	0.123	2.631	0.889	12.861	1.948	3.985	1.274	1.056	6.759	4.699	3.667	0
TRINITY_DN23359_c0_g1_i1	0	0.247	0.259	0	0	0	0.029	0	0	0.111	0.105	1.232	0.176	1.672	0.057	0.236	0.598	0.352	0.518	0
TRINITY_DN23367_c0_g1_i1	0	0.212	0.352	0.194	0	0.092	0.315	0	0.049	0.166	0.502	3.075	0.425	3.335	0.393	0.111	0.774	0.759	0.614	0
TRINITY_DN23376_c0_g1_i1	0	1.42	5.022	0.785	0.34	0	1.268	0.132	0	5.852	1.223	22.988	3.584	11.984	3.237	0.986	13.429	8.538	8.178	0.124			sp|Q9P7J5|YJNA_SCHPO	Uncharacterized AAA domain-containing protein
TRINITY_DN23386_c0_g1_i1	0	0	0.13	0	0	0	0.226	0	0	0.305	0.251	1.733	0	1.844	0.105	0.806	0.235	0.315	0.547	0
TRINITY_DN23387_c0_g1_i1	0	0.115	0.056	0	0	0	0.157	0	0	0.111	0	2.584	0	3.956	0.115	0	3.565	0.49	1.315	0
TRINITY_DN23387_c0_g1_i2	0	0.035	0.25	0	0	0.164	0	0	0	0.148	0.722	1.422	0.207	2.647	0.038	0.208	0.519	0.796	0.278	0
TRINITY_DN23388_c0_g1_i1	0.116	12.623	27.528	3.963	2.585	1.281	8.652	0.659	0.336	32.741	3.911	82.115	23.775	40.929	12.095	6.599	35.047	31.016	44.536	1.823			sp|O94476|IF6_SCHPO	Eukaryotic translation initiation factor
TRINITY_DN23388_c0_g2_i1	0.306	16.68	21.57	6.618	1.468	0.379	9.488	0.932	1.049	27.914	7.675	98.171	15.902	87.841	18.559	8.613	63.845	41.229	33.71	1.191			sp|Q12618|ACO1_AJECA	Acyl-CoA desaturase OS=Ajellomyces capsulatus
TRINITY_DN23391_c0_g2_i1	0.124	0.662	0.908	0.504	0.055	0.082	0.59	0.053	0.098	1.551	0.774	7.783	1.243	7.196	0.986	0.82	5.632	2.553	2.908	0.05			sp|P70269|CATE_MOUSE	Cathepsin E OS=Mus musculus GN=Ctse PE=1
TRINITY_DN23392_c0_g1_i2	0.555	12.058	13.611	2.936	0.821	1.035	8.574	0.791	0.598	17.381	5.176	75.494	12.4	57.032	13.091	6.474	46.909	26.65	31.54	0.645
TRINITY_DN23394_c0_g1_i1	0.091	0.512	0.324	0.252	0.033	0	0.256	0.053	0.025	0.757	0.282	2.815	0.155	1.835	0.259	0.111	1.234	0.629	0.931	0
TRINITY_DN23404_c0_g1_i1	0	0.847	0	0	0	0.154	0.728	0.035	0.443	1.218	1.652	15.345	0.559	21.597	1.082	2.028	0	0.833	3.58	0
TRINITY_DN23404_c0_g1_i2	0	0.265	1.751	0.281	0.11	0	0.462	0	0	1.089	0.523	14.604	0	7.301	0.967	0.292	20.619	5.624	4.962	0
TRINITY_DN23417_c0_g1_i2	0.041	0	1.167	0	0.12	0	0.767	0.114	0.18	2.252	0	8.885	0.736	7.769	1.322	0	6.357	2.969	3.772	0			sp|O13989|YEG7_SCHPO	Uncharacterized protein C26H5.07c OS=Schizosaccharomyces
TRINITY_DN23419_c0_g1_i1	0	1.191	1.01	0.572	0.482	0.051	0.56	0.062	0.107	0.794	0.753	5.028	1.616	5.973	0.594	0.82	4.29	2.035	1.67	0.062
TRINITY_DN23426_c0_g1_i1	0	0	0.269	0	0	0	0	0	0	1.08	0	1.102	0	2.81	0	0.556	0.137	0.268	2.054	0			sp|P48556|PSMD8_HUMAN	26S proteasome non-ATPase regulatory subunit
TRINITY_DN23426_c0_g1_i2	0.745	20.006	14.195	3.44	0.646	0.328	7.05	0.896	0.77	13.606	4.392	62.423	13.685	66.492	8.226	6.876	32.921	25.697	37.05	0.868			sp|Q5RE15|PSMD8_PONAB	26S proteasome non-ATPase regulatory subunit
TRINITY_DN23427_c0_g1_i1	0	0	0	0	0	0	0	0	0	0	10.112	8.183	0	0	9.519	0	0	7.012	7.074	0
TRINITY_DN23433_c0_g1_i2	0	16.768	24.618	0	0	0	12.733	0	1.074	32.113	61.55	279.029	7.904	392.16	8.734	38.814	246.014	87.23	86.145	0
TRINITY_DN23439_c0_g1_i1	0.108	3.246	6.699	2.151	0.975	0.512	2.763	0.132	0.107	11.252	1.673	28.757	5.045	11.506	4.156	2.084	17.465	13.811	14.714	0.695			sp|Q4PBF2|NOP58_USTMA	Nucleolar protein 58 OS=Ustilago maydis
TRINITY_DN23440_c0_g1_i4	0	0	0.862	0	0	0	0	0	0	1.874	0	11.809	0.394	22.992	0.373	0	10.079	4.061	2.179	0			sp|Q6DFA6|CQ10A_XENLA	Coenzyme Q-binding protein COQ10 homolog
TRINITY_DN23442_c0_g2_i1	0	0.194	0	0	0	0	0	0	0.066	0.36	0	2.484	0.197	1.242	0.345	0.181	2.282	0.805	0	0
TRINITY_DN23445_c0_g1_i1	0	0	0	0.174	0.241	0	0	0.079	0	0.314	0.094	1.793	0	0.554	0.316	0	5.564	1.388	0.317	0			sp|P29742|CLH_DROME	Clathrin heavy chain OS=Drosophila melanogaster
TRINITY_DN23446_c0_g1_i2	0	4.604	3.113	0.921	0.186	0.154	1.937	0.281	0.426	5.4	2.897	31.582	2.642	25.649	3.84	2.542	20.041	11.942	11.518	0.087			sp|Q9SK39|SBP3_ARATH	Probable steroid-binding protein 3 OS=Arabidopsis
TRINITY_DN23448_c0_g1_i1	0	1.738	4.596	0.174	0	0	2.547	0.158	0.213	5.363	6.253	52.897	1.771	45.172	1.992	2.32	30.502	15.476	14.695	0.273
TRINITY_DN23455_c0_g1_i1	0.041	0.053	0.037	0	0	0.133	0.088	0	0	0.157	0.105	1.182	0.093	2.475	0.192	0.111	0.215	0.333	0.48	0			sp|Q9NBX4|RTXE_DROME	Probable RNA-directed DNA polymerase from
TRINITY_DN23460_c0_g1_i2	0.348	6.474	3.502	2.238	0.58	0.184	2.379	0	0.443	2.732	3.022	36.67	1.077	39.964	3.821	4.668	35.38	11.369	10.808	0.409			sp|P36091|DCW1_YEAST	Mannan endo-1,6-alpha-mannosidase DCW1 OS=Saccharomyces
TRINITY_DN23461_c0_g1_i1	0	0.141	0.287	0	0.044	0	0.246	0.035	0	0.618	0	2.314	0.311	0.516	0.479	0.083	2.468	0.749	0.854	0
TRINITY_DN23462_c0_g1_i2	0.05	3.899	7.709	0.61	0.23	0.102	3.579	0.132	0.295	6.618	4.674	45.415	2.911	41.14	3.764	4.168	36.653	17.159	19.437	0.112			sp|Q7D745|Y2525_MYCTO	Putative trans-acting enoyl reductase MT2525
TRINITY_DN23465_c0_g1_i1	0	0.582	0.695	0.32	0.099	0	0.393	0.035	0.033	1.154	0.69	6.35	0.332	2.523	0.584	0.458	3.928	2.414	1.238	0			sp|Q7Z7L9|ZSCA2_HUMAN	Zinc finger and SCAN domain-containing
TRINITY_DN23469_c0_g1_i1	0.149	1.411	1.269	0.484	0.153	0.307	1.062	0.246	0.041	2.095	1.088	10.607	2.258	7.043	2.155	1.278	5.711	2.997	3.859	0			sp|O13332|AUR1_CANAL	Inositol phosphorylceramide synthase OS=Candida
TRINITY_DN23471_c0_g1_i1	0.041	0.891	1.297	0.426	0.077	0.307	0.531	0.193	0.066	2.114	0.481	6.681	0.487	4.816	1.073	0.639	5.191	3.164	3.935	0.087
TRINITY_DN23482_c0_g1_i1	0.108	0.273	0.482	0.078	0.066	0	0.344	0.114	0.164	0.462	0.565	3.135	0.124	2.905	0.919	0.875	4.31	1.869	0.576	0			sp|Q01772|GLOX_PHACH	Aldehyde oxidase GLOX OS=Phanerochaete chrysosporium
TRINITY_DN23486_c0_g1_i1	0.108	7.021	11.628	2.955	0.526	0.461	4.877	0.51	0.467	11.132	4.057	50.854	10.732	35.817	8.36	4.195	21.226	19.352	23.084	0.769
TRINITY_DN23506_c0_g1_i1	0	0.335	0.269	0.078	0.077	0	0.079	0	0	0.923	0.178	3.916	0	0.526	0.45	0	4.408	1.175	1.353	0			sp|S0ECK8|FUJ4_GIBF5	Fujikurins efflux protein FFUJ_12242 OS=Gibberella
TRINITY_DN23508_c0_g1_i2	0	0.52	0.473	0.184	0	0.072	0.275	0.088	0	1.154	0.178	3.275	0.912	2.475	0.67	0.431	2.39	1.258	1.478	0.149
TRINITY_DN23509_c0_g1_i1	0	0	0.074	0.329	0	0	0.482	0	0.066	1.025	0.638	3.786	1.43	4.893	1.274	1.042	1.812	2.109	0	0
TRINITY_DN23515_c0_g1_i1	0	0.644	1.047	0.368	0.033	0.051	0.57	0.018	0.074	1.726	0.596	8.835	0.622	4.138	0.967	0.458	5.182	3.071	3.187	0.149			sp|Q9HDG2|NCPR_PHACH	NADPH--cytochrome P450 reductase OS=Phanerochaete
TRINITY_DN23517_c0_g1_i1	0.141	1.455	1.14	0.446	0.164	0.072	0.747	0.202	0.188	3.803	0.397	10.087	1.305	5.39	1.523	0.695	7.924	5.578	4.502	0.211			sp|P56287|EI2BE_SCHPO	Probable translation initiation factor
TRINITY_DN23519_c0_g1_i3	0.182	1.552	3.725	0.669	0.438	0	1.996	0.299	0.336	5.575	2.165	16.728	2.838	17.478	2.969	3.265	11.989	10.61	8.61	0.112			sp|Q68F29|V26BA_XENLA	Vacuolar protein sorting-associated protein
TRINITY_DN23523_c0_g1_i3	0	2.038	1.705	0.504	0.394	0	1.74	0.299	0.352	4.588	1.976	22.948	1.875	14.115	2.298	1.056	12.557	6.965	10.04	0.273
TRINITY_DN23530_c0_g1_i1	0.108	0.459	0.389	0.116	0.033	0	0.147	0	0.033	0.609	0.22	2.734	0.207	1.481	0.412	0.139	1.332	0.537	0.653	0
TRINITY_DN23539_c0_g1_i2	0	0.379	0.825	0.397	0	0	0.944	0.07	0.123	1.237	0.209	5.729	0.394	3.708	0.919	0.611	3.565	2.581	1.421	0			sp|P40074|AVT6_YEAST	Vacuolar amino acid transporter 6 OS=Saccharomyces
TRINITY_DN23541_c0_g1_i1	0	0.591	0.361	0.203	0.033	0	0	0	0.033	0.36	0.272	2.374	0.124	1.558	0.431	0.153	1.322	0.768	0.547	0.062
TRINITY_DN23542_c0_g1_i1	0.017	0.344	0.204	0.029	0	0	0.069	0	0.016	0.24	0.105	1.302	0.135	1.376	0.105	0.153	0.97	0.805	1.526	0.012
TRINITY_DN23544_c0_g1_i1	0.05	1.156	2.733	0.688	0.088	0.072	0.914	0.088	0.098	4.495	0.596	11.439	2.051	3.268	1.657	0.847	6.808	4.699	4.55	0.397			sp|O94653|BMS1_SCHPO	Ribosome biogenesis protein bms1 OS=Schizosaccharomyces
TRINITY_DN23545_c0_g1_i1	0.041	0.282	0.473	0.262	0.055	0.02	0.187	0.018	0.049	0.794	0.23	3.225	0.342	2.389	0.402	0.111	2.537	1.267	1.421	0			sp|Q6NZQ4|PAXI1_MOUSE	PAX-interacting protein 1 OS=Mus musculus
TRINITY_DN23546_c0_g1_i2	0	0	0	0	0	0.072	0	0.141	0.09	0.609	3.545	3.556	0	0	0	0	0.686	0.953	0.941	0			sp|P15700|KCY_YEAST	Uridylate kinase OS=Saccharomyces cerevisiae
TRINITY_DN23556_c0_g1_i1	0	0.617	2.687	0	0	0	1.013	0	0	3.738	0.544	28.867	0.497	7.884	1.322	0.611	11.157	4.486	8.687	0		Serine_Peptidases	sp|P34946|CPS1_PENJA	Carboxypeptidase S1 OS=Penicillium janthinellum
TRINITY_DN23560_c0_g1_i1	0.058	4.569	3.113	1.483	0.285	0.123	1.681	0.193	0.213	6.323	1.82	20.303	4.517	14.621	3.457	1.556	9.442	7.298	10.107	0.273			sp|P0CU37|DPH52_CANAL	Diphthine methyl ester synthase 2 OS=Candida
TRINITY_DN23564_c0_g1_i2	0	0	0	0	0	0	0	0	0	0.369	0.063	0.731	0	1.911	0	0.278	0.49	0.416	0.25	0
TRINITY_DN23586_c0_g1_i2	0	1.632	2.65	0.368	0	0	1.514	0.053	0.303	3.563	1.464	21.175	1.295	19.676	2.203	0	12.606	6.854	8.543	0			sp|Q9ZVJ2|AMERL_ARATH	Uncharacterized protein At2g38710 OS=Arabidopsis
TRINITY_DN23587_c0_g1_i1	0.174	24.284	25.86	6.318	2.705	3.228	7.492	0.114	1.68	21.729	17.547	80.863	35.792	120.046	11.415	7.432	42.756	28.824	29.102	1.401
TRINITY_DN23596_c0_g1_i1	0	0.459	0.148	0.068	0	0	0.197	0.062	0	0.194	0.073	3.946	0	6.393	0.297	0	3.027	1.138	2.073	0
TRINITY_DN23600_c0_g1_i2	0	0.926	0	0	0.077	0	0.718	0	0.229	1.505	0.314	3.786	0.259	3.048	1.59	1.473	1.352	0.315	1.267	0
TRINITY_DN23602_c0_g1_i3	0	0	0	0	0	0	0	0	0	0.591	0	1.643	0	0.946	0	0	0.852	0.333	0.998	0
TRINITY_DN23614_c0_g1_i3	0	3.916	13.731	2.936	1.774	0.605	5.388	0.378	0.443	25.957	1.443	73.631	17.093	20.45	9.519	6.112	23.567	19.897	24.437	1.687			sp|Q4PB04|H32_USTMA	Histone H3.2 OS=Ustilago maydis (strain 521
TRINITY_DN23617_c0_g1_i3	0	4.86	8.311	1.269	1.676	0.195	2.891	0.378	0.688	11.455	3.252	37.702	6.485	30.57	6.598	2.459	16.848	11.794	17.92	0.881			sp|Q9QZH3|PPIE_MOUSE	Peptidyl-prolyl cis-trans isomerase E OS=Mus
TRINITY_DN23621_c0_g1_i1	0	0.088	0.12	0.048	0.099	0	0.206	0	0	0.369	0.115	1.803	0.259	1.682	0.23	0.57	0.803	0.527	0.509	0
TRINITY_DN23657_c0_g1_i1	0	0	0	0	0	0	0	0	0	0.046	0.052	1.352	0	0.545	0.038	0	0.735	0.333	0.413	0
TRINITY_DN23663_c0_g1_i1	0.215	4.763	2.446	0.775	0.142	0.451	2.006	0.352	0.393	4.661	1.318	13.122	2.89	14.029	2.93	1.973	7.856	4.745	5.509	0.509
TRINITY_DN23665_c0_g1_i1	0	0	0	0.165	0	0	0	0	0	0.517	0	1.673	0.549	0.965	0.354	0	0.235	0.194	0.576	0
TRINITY_DN23667_c0_g1_i5	0.422	59.655	91.895	17.868	5.29	2.541	30.44	2.311	2.147	85.319	20.799	272.829	78.97	227.19	53.829	37.994	113.672	96.925	128.09	6.263			sp|Q9UUY8|NDK_NEUCR	Nucleoside diphosphate kinase OS=Neurospora
TRINITY_DN23676_c0_g1_i3	0.265	1.773	2.011	0.853	0.142	0.051	0.728	0.237	0	3.785	0.586	11.048	1.813	8.859	2.126	0.611	7.983	4.819	4.607	0.298			sp|O13901|YF3A_SCHPO	Uncharacterized CDP-alcohol phosphatidyltransferase
TRINITY_DN23677_c0_g1_i1	0.058	0.573	1.927	0.359	0.033	0	0.983	0.035	0.369	2.391	1.61	26.233	0.321	20.422	1.743	1.903	23.988	7.863	6.94	0
TRINITY_DN23678_c0_g1_i2	0	0.362	2.409	1.676	0	0.092	1.091	0.026	0.057	2.345	0.805	14.945	1.658	3.077	1.532	1.959	7.199	4.163	7.89	0.794			sp|P39932|STL1_YEAST	Sugar transporter STL1 OS=Saccharomyces
TRINITY_DN23700_c0_g1_i3	0.215	3.961	7.551	2.355	0.46	0.051	3.756	0.325	0.27	9.72	1.893	33.926	5.832	18.338	4.597	2.209	23.45	15.106	16.778	0.533			sp|Q9Y7N0|BDF1_SCHPO	SWR1 complex bromodomain subunit bdf1 OS=Schizosaccharomyces
TRINITY_DN23710_c0_g1_i1	0	2.082	6.699	1.327	0.81	0	2.173	0.167	0.164	7.357	1.851	29.609	5.573	15.682	3.266	2.167	17.308	9.972	13.582	0.595			sp|Q9Y3B2|EXOS1_HUMAN	Exosome complex component CSL4 OS=Homo
TRINITY_DN23719_c0_g1_i1	0	1.861	5.374	1.531	0	0.195	5.771	0	0.811	6.157	4.204	51.815	3.253	40.643	5.727	9.391	22.715	23.561	13.985	0
TRINITY_DN23742_c0_g1_i1	0.033	0.741	1.167	0.833	0.219	0.031	0.983	0.097	0.049	1.671	0.408	9.896	0.798	5.619	1.618	0.542	7.444	3.7	2.39	0.136			sp|C4R360|PSD2_KOMPG	Phosphatidylserine decarboxylase proenzyme
TRINITY_DN23750_c0_g2_i1	0	1.085	2.743	0.484	0.175	0	1.072	0.202	0.156	3.24	0.502	14.965	1.689	7.932	2.136	0.82	11.421	5.846	4.415	0.062			sp|P49602|CP51_USTMA	Lanosterol 14-alpha demethylase OS=Ustilago
TRINITY_DN23751_c0_g1_i1	0	0	0	0.107	0	0	0.157	0	0.09	0.092	0.125	1.232	0.487	1.032	0.144	0.097	0.774	0.426	0.259	0
TRINITY_DN23759_c0_g1_i1	0.563	5.054	9.145	2.665	0.602	0.348	3.127	0.51	0.475	8.538	3.001	35.008	4.372	25.592	5.736	3.806	25.311	14.939	17.536	1.042			sp|O60074|DID2_SCHPO	Vacuolar protein-sorting-associated protein
TRINITY_DN23770_c0_g1_i2	0.29	21.779	32.698	8.081	3.417	1.66	12.968	1.433	0.967	39.36	12.245	146.08	32.446	101.516	23.204	12.85	64.05	55.345	64.607	2.356
TRINITY_DN23779_c0_g1_i1	0.05	1.358	1.26	0.233	0.186	0.143	0.737	0.026	0.025	1.938	0.575	7.943	0.518	3.65	0.938	0.5	4.32	2.932	3.715	0.223			sp|O60070|ASH2_SCHPO	Set1 complex component ash2 OS=Schizosaccharomyces
TRINITY_DN23782_c0_g1_i1	0	0.291	0.315	0.174	0	0	0	0	0	0.378	0.376	2.875	0.104	1.653	0.144	0	3.967	1.693	1.545	0			sp|O15527|OGG1_HUMAN	N-glycosylase/DNA lyase OS=Homo sapiens
TRINITY_DN23782_c0_g1_i2	0	0.556	0	0.291	0.099	0.072	0.511	0.281	0	0.978	0.272	4.888	1.171	3.526	0.555	0.764	0	0.749	0.595	0			sp|O70249|OGG1_RAT	N-glycosylase/DNA lyase OS=Rattus norvegicus
TRINITY_DN23788_c0_g2_i1	0	0.159	2.122	0.107	0	0	0	0	0.148	1.089	0.732	10.678	0.725	5.686	0.182	1.056	4.3	1.156	3.014	0
TRINITY_DN23791_c0_g1_i2	0	0.706	1.084	0.184	0	0	0.216	0	0.107	1.338	0.868	8.975	0.445	6.871	0.709	0.806	5.711	2.757	3.196	0
TRINITY_DN23795_c0_g1_i1	0	0.75	1.566	0.329	0.099	0	0.541	0.035	0.123	1.098	0.366	5.469	0.849	4.224	1.178	0.472	5.113	3.025	4.099	0.124
TRINITY_DN23805_c0_g1_i2	0.903	5.672	22.098	3.653	1.588	0.348	7.01	1.538	0.967	17.658	2.959	44.393	8.453	38.168	9.663	8.154	73.836	37.824	29.112	0.595			sp|Q9UT55|ART1A_SCHPO	Protein-glutamate O-methyltransferase SPCC1393.13
TRINITY_DN23807_c0_g1_i1	0.323	0.291	2.057	0.921	0.219	0.164	1.141	0.422	0.188	1.043	0.523	4.497	0.767	9.098	1.963	1.445	3.458	1.73	0.701	0
TRINITY_DN23811_c0_g1_i3	4.009	195.214	237.297	48.119	17.13	7.019	73.042	8.323	5.737	238.28	53.854	767.973	210.835	591.188	113.672	78.905	328.156	261.293	368.674	21.494			sp|Q9LUQ6|RL192_ARATH	60S ribosomal protein L19-2 OS=Arabidopsis
TRINITY_DN23816_c0_g2_i1	0.033	0.335	0.741	0.039	0.022	0	0.108	0.062	0.033	0.692	0.052	2.063	0.28	1.089	0.412	0.445	1.195	0.907	0.451	0
TRINITY_DN23817_c0_g1_i1	0	0.229	0.306	0.078	0	0	0.265	0.018	0.107	0.582	0.805	5.389	0.021	4.186	0.115	0.486	4.006	2.155	2.035	0.037			sp|Q9P380|PTR2_SCHPO	Probable peptide transporter ptr2 OS=Schizosaccharomyces
TRINITY_DN23821_c0_g1_i1	0.464	4.331	10.479	12.558	2.793	0.758	4.365	0.378	1.467	2.889	14.546	99.293	2.859	105.883	12.66	17.948	107.149	23.931	18.314	3.411
TRINITY_DN23821_c0_g1_i4	2.634	1.464	12.277	13.236	2.508	3.361	10.196	1.274	1.049	2.751	13.385	116.281	3.657	156.579	14.958	36.244	113.418	23.625	31.617	3.671
TRINITY_DN23823_c0_g1_i1	0	0.256	0.343	0.378	0.077	0.328	0.226	0	0.131	0.545	0.512	2.945	0.093	2.552	0.134	0.695	2.126	0.685	0.461	0.496
TRINITY_DN23825_c0_g1_i1	0	2.196	1.251	0.504	0.12	0.195	0.954	0.044	0.148	2.437	0.387	10.627	1.305	6.307	1.187	1.445	7.875	4.422	3.686	0			sp|Q6BJM5|OXR1_DEBHA	Oxidation resistance protein 1 OS=Debaryomyces
TRINITY_DN23829_c0_g1_i1	0.066	0.123	0.584	0.116	0	0	1.082	0.018	0.139	0.572	1.788	16.317	0.062	24.798	0.603	2.153	19.179	5.818	3.215	0
TRINITY_DN23833_c0_g1_i2	0	0.388	0.259	0.194	0.033	0.02	0.167	0.053	0.033	0.535	0.22	2.144	0.29	1.911	0.536	0.445	1.303	0.823	0.662	0.025
TRINITY_DN23837_c0_g1_i1	0.091	1.5	3.891	1.279	0.153	0.195	1.347	0.088	0.107	3.858	0.742	16.988	2.269	6.986	1.475	0.542	11.137	10.037	10.213	0.211			sp|Q6ZQL4|WDR43_MOUSE	WD repeat-containing protein 43 OS=Mus
TRINITY_DN23838_c0_g1_i3	0	0	0.009	0	0	0	0	0	0	0.563	0	0.681	0	0.067	0.536	0	1.45	0.093	0.317	0			sp|Q6GNT9|MEMO1_XENLA	Protein MEMO1 OS=Xenopus laevis GN=memo1
TRINITY_DN23839_c0_g1_i1	0.141	0.415	0.751	0	0.186	0	0.324	0.035	0.033	0.812	0.607	2.925	0.932	3.603	0.22	0	3.565	1.36	1.92	0.26
TRINITY_DN23839_c0_g1_i2	0.124	0	0	0	0	0	0.393	0	0	0	0.22	2.865	0.528	2.16	0.402	0	1.234	0.546	1.19	0
TRINITY_DN23842_c0_g1_i1	0	0.882	1.214	0.252	0.044	0.061	0.511	0	0.033	2.889	0.241	7.542	1.046	3.45	0.958	0.32	3.389	2.442	2.668	0
TRINITY_DN23849_c0_g1_i1	0	4.084	4.262	0.562	0.427	0	1.18	0.105	0.139	4.163	1.495	18.39	2.269	18.921	1.331	0.931	10.393	7.076	7.64	0.087			sp|P87242|YC0H_SCHPO	HD domain-containing protein C4G3.17 OS=Schizosaccharomyces
TRINITY_DN23849_c0_g1_i3	0	0	0	0	0	0	0	0	0	0	0	0.891	0	0.736	0.46	0	0.539	0.194	0.701	0			sp|P87242|YC0H_SCHPO	HD domain-containing protein C4G3.17 OS=Schizosaccharomyces
TRINITY_DN23856_c0_g1_i4	0.124	3.908	9.933	1.172	0.153	0	4.257	0.325	0.377	7.772	1.171	32.213	5.19	22.151	3.457	2.889	19.561	11.193	12.315	0.719			sp|Q04344|HNT1_YEAST	Hit family protein 1 OS=Saccharomyces cerevisiae
TRINITY_DN23861_c0_g1_i1	0.066	1.782	1.992	1.017	0.088	0.205	0.875	0.044	0.115	2.502	1.349	9.155	1.689	7.349	1.858	0.764	5.593	3.265	3.283	0.223			sp|P54857|TGL2_YEAST	Lipase 2 OS=Saccharomyces cerevisiae (strain
TRINITY_DN23861_c0_g1_i2	0	0	0	0	0	0	0	0.044	0	0.203	0.209	0.861	0.342	0.669	0.239	0	0.558	0.379	0	0			sp|P54857|TGL2_YEAST	Lipase 2 OS=Saccharomyces cerevisiae (strain
TRINITY_DN23871_c0_g1_i2	0	0.37	0	0	0	0	0	0.035	0.033	0	0.491	0.661	0.818	2.179	1.015	1.097	0	0.509	0.729	0.422
TRINITY_DN23875_c0_g1_i1	0	0.123	0	0.097	0	0	0.6	0	0.197	0.471	1.569	7.873	0.083	6.508	0.124	0.431	6.661	2.054	2.217	0
TRINITY_DN23882_c0_g1_i1	0.041	0.829	1.195	0.484	0.099	0.041	0.639	0.026	0.025	1.403	0.491	8.224	0.477	5.055	1.302	0.695	4.055	2.914	2.409	0.174			sp|Q9UR39|HST4_SCHPO	NAD-dependent protein deacetylase hst4 OS=Schizosaccharomyces
TRINITY_DN23885_c0_g1_i3	0.29	13.267	14.324	4.389	1.117	0	6.676	0.694	1.336	16.467	6.055	59.888	15.663	52.865	9.873	7.126	28.543	21.636	27.48	0.446			sp|Q6CG53|N7BM_YARLI	NADH dehydrogenase [ubiquinone] 1 alpha
TRINITY_DN23905_c0_g1_i1	0	0.194	0.398	0.078	0	0	0.177	0	0.049	0.222	0.345	5.499	0.228	5.657	0.278	0.458	3.565	1.628	1.373	0
TRINITY_DN23918_c0_g1_i1	0.033	2.002	2.465	0.804	0.12	0.031	1.642	0.149	0.229	2.963	1.412	18.51	1.689	10.751	2.174	0.514	11.607	7.289	8.898	0.248
TRINITY_DN23924_c0_g1_i1	0.538	12.737	15.835	3.469	1.851	0.789	7.757	0.343	0.549	16.541	3.346	61.952	15.301	40.691	10.611	4.209	31.687	19.805	28.997	1.761
TRINITY_DN23924_c0_g1_i3	0	0	0	0.145	0	0	0	0	0	0.517	0	1.873	0.218	1.07	0	0.292	0.47	0.315	0.221	0
TRINITY_DN23927_c0_g1_i1	0	0	0	0	0	0	0	0	0.098	0	0	1.022	0	0.822	0.048	0.208	0.646	0.231	0.346	0.273
TRINITY_DN23934_c0_g1_i1	0.075	0.362	0.834	0.203	0	0.072	0.393	0.026	0.156	0.646	0.408	5.319	0.352	4.864	0.584	0.236	5.838	3.552	4.732	0			sp|P0DPB2|PSIT2_PSICU	Major facilitor-type transporter psiT2
TRINITY_DN23953_c0_g1_i1	0	1.376	0.287	0.31	0.022	0.072	0.61	0.07	0	0.905	0.46	6.3	0.829	5.543	0.776	0.194	3.399	1.943	1.248	0.037
TRINITY_DN23968_c0_g1_i2	0	0	0.843	0.252	0	0	0.619	0	0	1.449	0.136	8.264	0.756	2.007	0.441	0	7.552	2.091	3.321	0			sp|P06782|SNF1_YEAST	Carbon catabolite-derepressing protein kinase
TRINITY_DN23974_c0_g1_i1	0	0.891	1.436	0.446	0.142	0.051	1.514	0.097	0.033	3	0.753	17.709	1.098	9.136	1.867	0.959	11.078	6.484	5.423	0
TRINITY_DN23978_c0_g1_i2	0.157	0.459	0.519	0.126	0	0	0.511	0.035	0	0.443	0.303	3.576	0.487	2.647	0.575	0.278	2.811	1.656	1.344	0			sp|O13717|YDZA_SCHPO	Uncharacterized protein C14C4.10c OS=Schizosaccharomyces
TRINITY_DN23978_c0_g2_i1	0	0	0	0	0	0	0.413	0.193	0	0.388	0	3.346	0.746	4.195	0.192	0	0.441	0.416	1.017	0
TRINITY_DN2397_c0_g1_i1	0	2.258	3.132	0.262	0.12	0	1.671	0.114	0.057	3.517	1.673	16.117	1.181	15.959	1.513	1.292	9.727	5.504	6.959	0		Serine_Peptidases
TRINITY_DN23987_c0_g1_i2	0	0	0	0.32	0	0.061	0	0	0	1.542	0.052	8.644	0	0.363	0	0.847	8.953	2.303	4.223	0.037			sp|Q12469|SKM1_YEAST	Serine/threonine-protein kinase SKM1 OS=Saccharomyces
TRINITY_DN23989_c0_g1_i1	0	0	0	0	0	0	0.354	0	0	1.902	0	6.11	1.015	0.669	1.408	0.458	1.557	1.175	1.488	0
TRINITY_DN23990_c0_g1_i1	0	0.203	0.602	0.31	0.164	0	0.393	0	0.057	1.025	0.376	4.658	0.394	2.38	0.45	0.32	2.694	1.869	1.747	0.037
TRINITY_DN23992_c0_g1_i1	0.058	0	1.075	0	0.241	0	0	0.114	0.213	2.557	1.088	9.265	0.953	5.055	0.67	1.611	2.096	1.092	4.281	0.136
TRINITY_DN23994_c0_g1_i1	0.041	0.767	2.196	0.359	0.241	0.092	0.855	0.026	0.016	3.443	0.157	8.454	1.44	2.771	1.006	0.472	5.182	4.144	4.338	0			sp|P87115|NAT10_SCHPO	RNA cytidine acetyltransferase OS=Schizosaccharomyces
TRINITY_DN23994_c0_g1_i2	0	0	0	0	0	0	0	0	0	0.212	0	0.12	0	0.363	0.096	0	0.274	0.093	0	0			sp|P87115|NAT10_SCHPO	RNA cytidine acetyltransferase OS=Schizosaccharomyces
TRINITY_DN23994_c0_g1_i3	0	0	0	0	0	0.154	0	0	0.025	0.055	1.129	0	0.59	3.679	0	0	0.078	0	0.182	0.087
TRINITY_DN23999_c0_g1_i2	0.05	0	0.519	0	0.208	0	0	0	0	0.305	0.01	1.603	0.736	0.22	0.584	0.514	1.92	0.407	3.167	0.174
TRINITY_DN23999_c0_g1_i3	0	0.891	4.308	1.483	0	0.307	1.642	0.097	0.033	2.631	0.805	13.172	2.921	2.724	3.093	2.876	10.402	7.308	8.159	0.285
TRINITY_DN24010_c0_g1_i3	0	0.423	0.13	0.029	0	0	0.088	0	0	0.378	0.167	2.384	0.093	2.035	0.23	0.153	1.939	0.555	0.816	0.099
TRINITY_DN24019_c0_g1_i2	0	1.138	1.269	0.649	0.405	0.061	0.639	0.079	0.074	2.483	1.067	9.055	1.077	5.342	1.235	1.264	6.857	4.736	3.638	0.074
TRINITY_DN24022_c1_g1_i1	0	0	0	0	0	0	0	0	0	0.24	0	1.062	0	0.373	0	0.292	0.637	0.167	0.374	0
TRINITY_DN24024_c0_g1_i1	0	0.291	0.13	0.116	0	0	0	0	0	0.462	0.021	1.673	0.352	2.953	0.211	1.459	1.567	0.703	0.394	0
TRINITY_DN24024_c0_g1_i2	0	0	0	0	0	0	0	0.053	0	0.083	0.115	1.523	0	1.634	0	0	1.802	0	0.326	0
TRINITY_DN24038_c0_g1_i3	0	0.071	0.176	0.242	0	0	0.236	0	0	0	0.617	5.669	0	4.147	0	0.583	0.754	1.6	0.72	0			sp|Q9UW02|THIO_COPCM	Thioredoxin OS=Coprinus comatus PE=1 SV=1
TRINITY_DN24045_c0_g1_i1	0.066	0.679	0.927	0.281	0.131	0	0.383	0.088	0.041	0.988	0.45	4.127	0.559	1.319	0.555	0.069	3.791	2.313	2.88	0.037			sp|G0S4F3|NUP82_CHATD	Nucleoporin NUP82 OS=Chaetomium thermophilum
TRINITY_DN24049_c0_g1_i1	0	1.314	0	0.262	0.099	0.072	0.767	0.044	0	2.308	0.575	9.516	1.119	6.833	1.235	0.847	3.732	2.627	2.313	0		Metallo_Peptidases=EAU91347	sp|Q65N07|TSAD_BACLD	tRNA N6-adenosine threonylcarbamoyltransferase
TRINITY_DN24050_c0_g1_i3	0	1.808	1.918	0.242	0	0.092	0.58	0.026	0.41	1.274	2.091	23.929	0.487	21.339	2.193	2.042	5.005	3.663	5.653	0
TRINITY_DN24052_c0_g1_i1	0.157	3.273	4.207	0.814	0.416	0.236	1.632	0.299	0.41	5.908	0.993	20.824	3.584	11.869	3.246	2.306	15.271	8.612	10.424	0.62			sp|O14113|SDE2_SCHPO	Telomere maintenance protein SDE2 OS=Schizosaccharomyces
TRINITY_DN24057_c0_g1_i1	0	1.323	5.661	0.94	0.197	0.154	1.583	0.29	0	0	2.165	33.816	0.984	28.611	1.073	4.723	14.389	7.752	8.773	0
TRINITY_DN24057_c0_g1_i2	0	1.111	2.706	0.388	0	0	1.917	0	0.303	9.305	1.443	19.252	2.041	10.827	4.099	1.222	13.008	5.347	4.07	0
TRINITY_DN24058_c0_g1_i1	0	0.679	1.186	0.32	0.131	0	0.315	0.105	0.025	1.375	0.261	6.671	0.114	2.093	0.871	0.25	5.671	2.784	2.236	0			sp|P0CR64|SNX41_CRYNJ	Sorting nexin-41 OS=Cryptococcus neoformans
TRINITY_DN24061_c0_g1_i2	0	0	0	0	0	0	0	0	0	0	0	0.611	0.311	0	0	0	0.196	0.333	0.317	0			sp|Q9TW28|MYOM_DICDI	Myosin-M heavy chain OS=Dictyostelium discoideum
TRINITY_DN24064_c0_g1_i1	0.033	0.653	0.417	0.097	0.066	0	0.364	0.018	0.016	0.942	0.241	3.305	0.445	2.332	0.498	0.347	2.253	1.092	1.104	0.074	CDR40532.1|GT90		sp|Q5K8R6|CXT1_CRYNJ	Beta-1,2-xylosyltransferase 1 OS=Cryptococcus
TRINITY_DN24070_c0_g1_i2	0	1.914	3.048	0.63	0.296	0	1.259	0.088	0.082	4.154	0.753	12.03	3.481	7.368	1.532	1.347	6.122	4.338	5.653	0.161		Serine_Peptidases	sp|Q3MHE2|PRP4_BOVIN	U4/U6 small nuclear ribonucleoprotein Prp4
TRINITY_DN24078_c1_g1_i1	0	2.029	1.103	0.329	0.252	0.102	0.993	0.185	0.139	1.957	0.418	6.22	0.632	5.992	1.887	0	6.514	3.349	3.071	0.223			sp|P38318|YB70_YEAST	Uncharacterized membrane protein YBR220C
TRINITY_DN24092_c0_g1_i1	0.174	0.9	0.556	0.271	0.208	0.041	0.777	0.088	0.057	1.985	0.69	9.035	0.808	8.82	1.053	0.625	8.052	3.275	2.716	0			sp|O74935|ACOX2_YARLI	Acyl-coenzyme A oxidase 2 OS=Yarrowia lipolytica
TRINITY_DN24098_c0_g1_i1	0	0	0.565	0	0	0	0.501	0	0	1.643	1.307	23.879	0	4.157	0.661	0	13.547	4.431	5.634	0
TRINITY_DN24105_c0_g1_i3	0.215	2.064	1.427	0.63	0.361	0	0.973	0.141	0.098	3.471	0.523	9.616	0.818	6.269	2.279	0.764	8.296	4.745	4.559	0			sp|Q9DBG7|SRPRA_MOUSE	Signal recognition particle receptor subunit
TRINITY_DN24110_c0_g2_i1	0.033	1.358	2.168	0.3	0.175	0.031	1.18	0.149	0.057	4.366	0.659	12.991	1.15	6.794	2.653	0.695	12.528	6.521	5.673	0.149			sp|P87140|COPG_SCHPO	Probable coatomer subunit gamma OS=Schizosaccharomyces
TRINITY_DN24112_c0_g1_i1	0.025	0.697	0.834	0.252	0.099	0.051	0.492	0.026	0.041	1.523	0.241	5.84	0.59	3.077	0.776	0.403	4.486	2.34	1.689	0.05			sp|Q4P3H6|SLA1_USTMA	Actin cytoskeleton-regulatory complex protein
TRINITY_DN24118_c0_g1_i1	0	0	2.177	0	0.11	0	0.846	0.202	0	2.788	0.575	9.215	1.844	8.257	2.547	0.834	4.731	4.357	4.166	0			sp|Q9HJ83|DNAJ_THEAC	Chaperone protein DnaJ OS=Thermoplasma acidophilum
TRINITY_DN24137_c0_g1_i1	0	1.42	7.088	0.359	0.635	0	0.698	0	0.287	4.643	2.342	18.34	4.703	7.291	3.476	1.764	7.425	8.057	8.427	0
TRINITY_DN24137_c0_g2_i2	1.035	22.59	35.459	7.258	1.161	0.533	10.658	1.134	2.287	26.649	12.339	105.544	27.701	106.332	19.478	9.377	60.642	38.019	53.828	2.592			sp|O42859|RT02_SCHPO	Probable 37S ribosomal protein mrp2, mitochondrial
TRINITY_DN24161_c0_g1_i4	0.787	14.343	19.569	5.484	1.205	0.564	6.735	1.371	0.836	16.172	6.358	75.023	13.757	74.3	14.547	4.598	35.566	25.762	36.935	1.6			sp|O74825|RPB4_SCHPO	DNA-directed RNA polymerase II subunit rpb4
TRINITY_DN24171_c0_g2_i1	0.066	0.723	0.871	0.349	0.099	0	0.56	0.097	0.115	1.468	0.471	5.609	0.684	4.807	0.862	0.486	5.368	2.488	2.544	0.025			sp|P56941|NPC1_PIG	Niemann-Pick C1 protein OS=Sus scrofa GN=NPC1
TRINITY_DN24263_c0_g1_i1	0	0.132	0.176	0.116	0	0	0	0.07	0.033	0.351	0.084	0.801	0.145	0.956	0.172	0.069	0.568	0.194	0.72	0			sp|Q9M2N5|DSLE_ARATH	Zinc finger BED domain-containing protein
TRINITY_DN24349_c0_g1_i1	0	2.249	4.522	0	0	0	1.858	0	0.213	5.123	4.036	52.737	0.601	31.784	2.413	0.445	41.404	13.616	11.652	0			sp|Q5QUP3|UBIA_IDILO	4-hydroxybenzoate octaprenyltransferase
TRINITY_DN24349_c0_g1_i3	0	0	0.278	0	0	0	0	0	0	0	0.387	1.973	0.145	2.399	0.134	0.708	0.989	0.888	1.008	0			sp|Q5QUP3|UBIA_IDILO	4-hydroxybenzoate octaprenyltransferase
TRINITY_DN24349_c0_g1_i5	0	0	0	0	0	0	0	0	0	0.111	0	1.132	0	1.816	0	0	1.371	0.694	1.113	0			sp|Q5QUP3|UBIA_IDILO	4-hydroxybenzoate octaprenyltransferase
TRINITY_DN24377_c0_g1_i1	0	0.82	0.751	0	0	0.143	0.954	0.088	0.246	0.351	1.412	9.796	0.881	15.472	0.948	1.736	3.987	1.906	2.236	0
TRINITY_DN24377_c0_g2_i1	0	1.473	1.186	0.484	0.088	0	1.239	0	0.082	2.511	0.648	10.347	0.352	7.033	1.207	0.181	8.855	4.144	2.352	0			sp|P21245|PM47A_CANBO	Peroxisomal membrane protein PMP47A OS=Candida
TRINITY_DN24388_c0_g1_i1	0	0	0.287	0.203	0	0	0.246	0	0	0.388	0	2.093	0.363	1.567	0.297	0.208	0.392	0.185	0.739	0			sp|P40581|GPX3_YEAST	Glutathione peroxidase-like peroxiredoxin
TRINITY_DN24388_c0_g1_i2	0.646	13.319	13.259	3.575	0.876	0.891	6.666	0.562	0.91	14.224	8.177	83.597	10.546	81.008	10.994	8.71	57.634	31.359	32.846	0.496			sp|P40581|GPX3_YEAST	Glutathione peroxidase-like peroxiredoxin
TRINITY_DN24391_c0_g1_i5	0.812	1.552	0.797	0.581	0.208	0	0.177	0.325	0.525	0	0	0	0	0	0	0	0	0.213	0	0.273
TRINITY_DN2439_c0_g1_i2	0	0.706	0.473	0	0	0	0.128	0	0.107	1.412	1.642	17.799	0	13.169	0.23	2.195	9.589	4.32	3.609	0
TRINITY_DN24411_c0_g1_i1	0	1.429	4.484	2.364	0.066	0.359	0.816	0	0.385	2.686	3.963	29.288	0	39.897	1.523	4.376	2.762	1.943	3.686	0.285			sp|Q96V64|EXG_BLUGR	Glucan 1,3-beta-glucosidase OS=Blumeria graminis
TRINITY_DN24411_c0_g1_i3	0	0	1.056	0	0	0	0.905	0	0	0.803	0	29.579	0.715	6.02	0.824	0	27.593	12.506	15.415	0			sp|Q96V64|EXG_BLUGR	Glucan 1,3-beta-glucosidase OS=Blumeria graminis
TRINITY_DN24463_c0_g1_i4	0.116	2.17	0.871	0.523	0.186	0	0.983	0.105	0.205	2.003	0.91	12.05	1.999	8.658	2.27	0	6.191	4.292	4.53	0.198
TRINITY_DN24472_c0_g1_i1	0.315	5.31	7.171	2.112	0.602	0.389	3.677	0.281	0.631	7.901	3.681	42.48	5.77	30.169	7.508	2.264	27.691	18.667	21.126	0.856			sp|Q92356|SYB1_SCHPO	Synaptobrevin homolog 1 OS=Schizosaccharomyces
TRINITY_DN24490_c1_g1_i1	0	0.238	0.426	0.194	0.088	0	0.285	0	0.082	0.6	0.105	2.083	0.518	3.622	0.086	0	0.98	0.851	0.576	0
TRINITY_DN24498_c0_g1_i3	0	2.24	1.047	0.436	0	0.564	1.789	0.352	0.484	2.852	1.276	16.838	1.575	25.181	0.891	1.292	14.957	6.679	11.412	0
TRINITY_DN24509_c0_g1_i2	0	0.071	0	0	0	0	0	0.035	0	0.138	0.084	1.382	0.104	0.344	0.278	0	0.764	0.407	0.288	0
TRINITY_DN24522_c0_g1_i2	0	0.485	0.213	0	0	0	0.413	0	0	0.702	0.293	6.35	0.435	3.478	0	0.278	2.596	2.128	3.398	0.124
TRINITY_DN24547_c0_g1_i1	0	0	0	0	0	0	0	0	0	0	0.376	0.611	0	0.478	0	0	1.264	0.222	0.442	0			sp|O13870|NOT3_SCHPO	General negative regulator of transcription
TRINITY_DN24547_c0_g1_i2	0.232	1.358	2.77	0.514	0.208	0.082	1.357	0.123	0.09	3.969	0.763	16.717	1.15	6.412	2.404	1.042	13.948	6.901	7.093	0.174			sp|O13870|NOT3_SCHPO	General negative regulator of transcription
TRINITY_DN24547_c0_g1_i3	0	0	0	0	0	0	0	0	0	0	0	0.2	0.414	1.252	0.23	0	0.127	0.379	0.202	0			sp|O13870|NOT3_SCHPO	General negative regulator of transcription
TRINITY_DN24560_c0_g1_i2	0	0.044	0	0	0	0	0.059	0	0	0	0	0.891	0	0.401	0.326	0	0.245	0.675	0.288	0			sp|P32604|F26_YEAST	Fructose-2,6-bisphosphatase OS=Saccharomyces
TRINITY_DN24560_c0_g1_i3	0	2.108	6.94	1.667	0.307	0	2.252	0.132	0.148	5.095	1.767	39.475	2.01	19.275	2.576	2.153	26.476	14.652	18.16	0.397			sp|P16118|F261_HUMAN	6-phosphofructo-2-kinase/fructose-2,6-bisphosphatase
TRINITY_DN24563_c0_g2_i1	0	0.176	0.426	0.087	0.077	0.041	0.344	0.026	0	0.969	0.324	3.586	0.249	1.672	0.718	0.111	3.301	1.637	1.094	0			sp|Q76PD2|HEL2_SCHPO	E3 ubiquitin-protein ligase hel2 OS=Schizosaccharomyces
TRINITY_DN24582_c0_g1_i1	0.331	10.832	18.559	3.178	1.325	0.687	6.735	0.721	0.549	19.421	4.904	75.855	10.888	53.563	11.54	4.293	43.549	28.565	33.652	0.843			sp|Q09154|UCRI_SCHPO	Cytochrome b-c1 complex subunit Rieske,
TRINITY_DN245_c0_g1_i1	0.041	0.273	0.324	0.484	0	0.184	0.541	0.114	0	0.738	0.512	3.556	0.238	4.826	0.603	0.528	3.585	1.61	1.181	0.05
TRINITY_DN24634_c0_g1_i2	0	0.256	0.102	0	0.077	0	0.088	0	0	0.388	0.293	0.481	0.031	2.016	0.038	0.083	0.98	0.37	0.259	0
TRINITY_DN24640_c0_g1_i1	0	0	0	0	0	0	0	0	0	0	0	0.901	0.228	0.573	0.105	0	0.127	0	0.163	0.087			sp|P55859|PNPH_BOVIN	Purine nucleoside phosphorylase OS=Bos taurus
TRINITY_DN24640_c0_g1_i4	0.058	2.92	1.232	0.543	0	0.123	1.524	0.114	0.279	1.689	1.077	10.597	0.963	6.584	1.35	1.07	8.385	4.57	5.097	0.31			sp|P55859|PNPH_BOVIN	Purine nucleoside phosphorylase OS=Bos taurus
TRINITY_DN24646_c0_g1_i3	0.066	0.723	1.01	0.048	0	0.072	0.02	0	0	0.046	0.857	7.873	0.321	4.224	0.249	0.264	5.622	1.915	2.486	0			sp|P39540|ELO1_YEAST	Elongation of fatty acids protein 1 OS=Saccharomyces
TRINITY_DN24652_c0_g1_i2	0	0	0	0	0	0	0	0	0	0	0	1.182	0	0.927	0	0	0.999	0	0	0			sp|B0F481|BIODA_ARATH	Bifunctional dethiobiotin synthetase/7,8-diamino-pelargonic
TRINITY_DN24652_c0_g1_i3	0.058	0.979	1.77	0.359	0.219	0.133	0.61	0.097	0.041	1.874	0.669	5.91	1.575	4.491	1.216	1.195	2.929	2.812	2.822	0.248			sp|B0F481|BIODA_ARATH	Bifunctional dethiobiotin synthetase/7,8-diamino-pelargonic
TRINITY_DN24661_c0_g1_i2	0	0.909	1.881	0.872	0.318	0.215	1.003	0	0	2.732	0.199	10.748	1.088	2.8	1.8	0.889	3.947	2.072	2.822	0.471
TRINITY_DN24671_c0_g1_i1	0.19	2.188	3.048	1.037	0.197	0.195	0.551	0.141	0.09	1.477	0.993	9.496	0.632	11.907	1.408	1.084	11.108	5.504	6.21	0.136
TRINITY_DN24674_c0_g1_i1	0	0.079	0	0	0	0	0.088	0	0	0.166	0.073	1.122	0.052	0.736	0.105	0.111	0.754	0.148	0.298	0
TRINITY_DN24677_c0_g1_i1	0	0.82	0.574	0.068	0.153	0	0.256	0.062	0.057	1.025	0.073	2.184	0.943	3.431	0.46	0	2.439	1.221	0.394	0.099
TRINITY_DN24684_c0_g1_i1	0.663	14.863	27.787	5.329	3.045	0	9.478	0.668	0.565	31.837	4.632	102.418	24.79	46.453	14.25	4.668	46.204	32.126	50.046	1.749			sp|P18253|CYPH_SCHPO	Peptidyl-prolyl cis-trans isomerase OS=Schizosaccharomyces
TRINITY_DN24686_c0_g1_i1	0	0.203	0.093	0	0	0	0.157	0	0	0.425	0.178	1.232	0.342	0.029	0.498	0	1.264	0.638	0.681	0
TRINITY_DN24691_c0_g1_i1	0	1.605	4.095	1.279	0.504	0.133	2.379	0.141	0.131	8.197	0.847	26.003	4.931	7.158	3.045	0.972	14.702	11.036	12.852	0.558			sp|Q4PDT1|DBP3_USTMA	ATP-dependent RNA helicase DBP3 OS=Ustilago
TRINITY_DN24695_c0_g1_i3	0.464	9.253	10.952	1.773	0.361	0.246	4.444	0.334	0.385	11.584	2.531	53.358	8.888	41.684	5.171	4.001	26.457	19.37	25.493	0.645			sp|Q9USQ9|PSB7_SCHPO	Probable proteasome subunit beta type-7
TRINITY_DN24696_c0_g1_i1	0.149	16.301	14.537	5.077	1.106	0.154	7.374	1.758	1.082	18.72	5.542	79.12	16.896	69.187	12.181	7.557	37.172	27.668	28.642	0.868			sp|Q9VAL0|SPCS1_DROME	Signal peptidase complex subunit 1 OS=Drosophila
TRINITY_DN24698_c0_g1_i3	0	0	0	0.484	0	0.041	0.61	0.026	0.074	0.148	0.261	2.755	0.59	1.013	0.91	0.431	3.418	0.25	0.413	0.136
TRINITY_DN24707_c0_g1_i5	0	0.485	0	0	0	0	0.187	0.193	0	0.102	0.199	4.027	0	3.268	0.412	0.32	1.42	1.341	0.758	0
TRINITY_DN24713_c0_g1_i4	0	0	0	0	0	0	0	0	0	0.074	0	0	0	0.411	0.124	0	0.196	0.453	0.23	0
TRINITY_DN24720_c0_g1_i1	0.19	5.372	11.026	3.013	1.139	0.195	5.319	0.852	0.844	15.148	4.151	52.116	6.34	28.267	7.403	4.404	35.341	20.332	21.356	0.757			sp|Q9UT36|GLO21_SCHPO	Probable hydroxyacylglutathione hydrolase
TRINITY_DN24729_c0_g1_i3	0.124	0.441	1.825	0.271	0.12	0	1.023	0	0.107	1.929	0.439	12.491	0.881	11.276	1.322	1.875	13.243	7.224	6.661	0
TRINITY_DN24729_c0_g2_i1	0.398	5.081	8.061	2.403	0.876	0.225	4.297	0.369	0.385	12.471	1.652	38.203	4.91	24.99	8.973	2.834	32.226	17.335	12.171	0.509			sp|Q9Y8H5|FAD12_MORAP	Delta(12) fatty acid desaturase OS=Mortierella
TRINITY_DN24730_c0_g1_i3	0	1.791	0.463	1.085	0.318	0.143	0	0	0	4.025	2.395	9.175	2.538	7.339	2.672	1.625	4.29	2.877	3.417	0.409			sp|Q9Y818|UBC15_SCHPO	Ubiquitin-conjugating enzyme E2 15 OS=Schizosaccharomyces
TRINITY_DN24730_c0_g1_i4	0	9.015	11.656	1.996	0.624	0.338	5.575	0.65	0.475	9.185	2.918	49.582	4.765	30.628	5.2	4.195	32.285	14.597	20.656	0.657			sp|Q9Y818|UBC15_SCHPO	Ubiquitin-conjugating enzyme E2 15 OS=Schizosaccharomyces
TRINITY_DN24732_c0_g1_i1	0	0	0.334	0	0	0	0.393	0	0	0.351	0	10.457	0	4.778	0.364	0	4.682	1.11	1.565	0
TRINITY_DN24732_c0_g2_i1	0	0.326	0.093	0	0	0	0.295	0	0	0.111	0.335	2.123	0.207	1.644	0.192	0.389	0.744	0.601	0.211	0
TRINITY_DN24735_c0_g1_i3	0	0.071	0.12	0	0	0	0.256	0	0	0.083	0.188	1.412	0.363	0.172	0.086	0.153	0.519	0.361	1.238	0.298
TRINITY_DN24746_c0_g1_i4	0	1.905	3.891	0.659	0.055	0.164	1.504	0.387	0.18	5.4	0.701	14.854	2.569	5.39	3.764	2.014	11.695	5.319	8.715	0.335			sp|P0CQ02|PTPA2_CRYNJ	Serine/threonine-protein phosphatase 2A
TRINITY_DN24750_c0_g1_i1	0	1.288	1.473	0.581	0	0.307	0.57	0.141	0.131	2.585	0.847	1.783	1.533	8.82	0.747	1.403	1.557	1.619	2.131	0.136			sp|Q4P6I3|CWC25_USTMA	Pre-mRNA-splicing factor CWC25 OS=Ustilago
TRINITY_DN24750_c0_g1_i3	0	0.891	1.584	0.514	0.307	0	0.678	0	0	1.505	0.387	10.758	0.736	2.647	1.685	0.32	6.955	2.812	2.822	0.285			sp|Q4P6I3|CWC25_USTMA	Pre-mRNA-splicing factor CWC25 OS=Ustilago
TRINITY_DN24756_c0_g1_i1	0	0.15	0.482	0.039	0.186	0	0.59	0.026	0.033	1.412	0.084	4.958	0.145	1.195	0.488	0.375	3.644	1.98	1.977	0			sp|P41889|CUT9_SCHPO	Anaphase-promoting complex subunit cut9
TRINITY_DN24763_c0_g1_i1	0.083	0.573	1.455	0.378	0.055	0	0.551	0.026	0.025	1.191	0.293	6.871	1.077	3.918	1.073	0.806	5.475	2.34	2.073	0.236			sp|P47013|DS1P1_YEAST	Dihydrosphingosine 1-phosphate phosphatase
TRINITY_DN24766_c0_g1_i1	0	0.732	0.695	0.329	0.164	0	0.403	0.097	0.09	0.822	0.178	5.088	1.357	2.179	0.546	0.681	2.106	1.36	1.603	0			sp|Q7SDM8|THG1_NEUCR	tRNA(His) guanylyltransferase OS=Neurospora
TRINITY_DN24766_c0_g1_i2	0	0.194	0.398	0.126	0.12	0	0.305	0	0.074	0.831	0	3.486	0	2.265	0.536	0	1.881	1.545	1.065	0.074			sp|Q5M965|THG1_RAT	Probable tRNA(His) guanylyltransferase OS=Rattus
TRINITY_DN24772_c0_g1_i5	0	0	0.306	0	0.033	0.041	0.295	0	0.148	0.748	0.303	2.113	0	1.835	0.268	0.389	0.98	0.527	0.499	0.05
TRINITY_DN24776_c0_g1_i2	0	1.235	1.195	0.494	0	0.092	0.423	0.114	0.156	2.363	0.387	7.733	1.16	3.345	1.168	0.458	4.937	2.313	2.755	0
TRINITY_DN24781_c0_g1_i1	0	3.837	10.034	0.901	0	0.184	4.395	0.114	0.27	9.96	1.37	43.552	2.745	56.764	5.296	2.32	24.125	6.873	14.465	0.099
TRINITY_DN24783_c0_g1_i1	0.058	2.311	1.844	0.591	0.186	0.113	0.433	0.035	0.098	2.326	0.899	9.836	1.533	5.571	1.35	0.445	6.69	4.218	3.254	0.062
TRINITY_DN24797_c0_g1_i2	0	2.973	2.965	1.579	0.372	0.092	1.632	0.176	0.492	3.406	1.192	16.748	2.134	14.42	3.246	2.764	12.332	6.161	4.857	0.112			sp|Q9Y6I8|PXMP4_HUMAN	Peroxisomal membrane protein 4 OS=Homo
TRINITY_DN24824_c0_g1_i2	0.447	2.452	8.571	2.151	0	0	4.572	0.58	0	8.926	4.852	56.663	3.015	34.441	6.627	2.626	37.075	22.284	27.528	0			sp|P47111|VPS55_YEAST	Vacuolar protein sorting-associated protein
TRINITY_DN24824_c0_g1_i3	0	0	0	0.291	0	0	0	0	0	0.046	1.61	3.005	0	5.294	0.287	0	0.833	2.044	0.749	0
TRINITY_DN24838_c0_g1_i1	0.091	0.053	0	0.068	0.066	0.051	0.128	0	0	0.138	0.073	1.352	0	1.089	0.086	0	1.939	0.416	0.394	0.05	CDR39118.1|GT49		sp|Q6P7A1|LARG2_RAT	LARGE xylosyl- and glucuronyltransferase
TRINITY_DN24856_c0_g1_i2	0	0.697	0.269	0	0	0	0.226	0	0	0.203	1.286	3.065	0	3.507	0.144	0.417	1.362	3.672	1.488	0
TRINITY_DN24856_c0_g2_i2	0	0.882	0.982	0	0	0	0.315	0	0	1.846	5.825	11.088	0.383	15.214	0.287	0.861	4.751	3.423	3.974	0
TRINITY_DN24862_c0_g1_i1	0	0.185	0.185	0.039	0.066	0.051	0.138	0.026	0.066	0.535	0.125	2.294	0.269	1.605	0.239	0.264	1.783	0.879	0.883	0.012
TRINITY_DN24863_c0_g1_i1	0	0	0.195	0.048	0.033	0.072	0	0.018	0.041	0.175	0	0.321	0.311	1.691	0.316	0.111	0.519	0.62	1.085	0.025
TRINITY_DN24864_c0_g1_i1	0.166	16.177	26.295	6.017	1.26	0.871	10.245	0.782	1.123	22.301	6.745	82.325	16.337	70.592	14.987	7.668	49.798	30.045	38.566	1.563
TRINITY_DN24867_c0_g1_i1	0	0	0	0	0	0	0	0	0	0.443	0	1.172	0	2.695	0.364	0	0.607	0.37	0	0
TRINITY_DN24867_c0_g1_i4	0.075	1.27	2.956	0.824	0.099	0	1.671	0	0	3.425	0.596	15.956	1.45	7.76	1.934	2.264	11.705	6.799	4.665	0.335
TRINITY_DN24868_c0_g1_i2	0.306	5.822	6.949	1.473	0.723	0.318	3.136	0.246	0.369	9.231	3.44	37.041	4.662	32.51	4.329	3.39	20.697	13.154	16.135	0.087			sp|Q6C7L4|TRXB_YARLI	Thioredoxin reductase OS=Yarrowia lipolytica
TRINITY_DN24869_c0_g1_i2	0	3.034	0.732	0.61	0.252	0.082	1.023	0.193	0.041	3.351	0.607	11.589	0.445	6.9	1.81	1.084	6.269	3.404	6.306	0			sp|O74736|ING2_SCHPO	Chromatin modification-related protein png2
TRINITY_DN24872_c0_g1_i2	0	1.5	2.39	0.746	0.022	0	0.708	0.053	0.123	1.855	0.774	10.948	0.632	6.957	1.513	0.32	8.639	4.708	5.615	0.236			sp|O13828|DCP2_SCHPO	mRNA decapping complex subunit 2 OS=Schizosaccharomyces
TRINITY_DN24873_c0_g1_i3	0.066	2.188	5.93	1.715	0.394	0.133	2.212	0.088	0.197	7.44	2.436	29.408	4.31	24.33	3.821	2.487	16.015	10.592	10.808	0.31			sp|P25416|QUTG_EMENI	Protein qutG OS=Emericella nidulans (strain
TRINITY_DN24875_c0_g1_i2	0	0	0.287	0.194	0	0	0	0	0	0.572	0	2.835	0.839	2.848	0.22	0	7.728	2.738	2.438	0			sp|P54708|AT12A_RAT	Potassium-transporting ATPase alpha chain
TRINITY_DN24876_c0_g1_i3	0	0	0	0	0	0	0	0	0.074	0	0	1.002	0	1.691	0.124	0.458	0.48	0.352	0.192	0
TRINITY_DN24877_c0_g1_i1	0	0.776	1.177	0.233	0.197	0.143	0.511	0.044	0.107	1.745	0.199	5.098	1.005	3.679	0.891	0.57	5.828	3.016	2.889	0.074			sp|Q9EPU0|RENT1_MOUSE	Regulator of nonsense transcripts 1 OS=Mus
TRINITY_DN24878_c0_g1_i1	0.091	1.226	2.9	0.959	0.219	0	1.101	0.114	0.107	3.674	0.418	11.789	1.046	3.249	1.551	0.556	9.07	4.477	6.767	0.471			sp|O42615|THDH_BLAAD	Threonine dehydratase, mitochondrial OS=Blastobotrys
TRINITY_DN24879_c0_g1_i1	0	0.988	1.816	0.378	0.088	0.031	0.905	0	0.123	2.557	0.408	6.811	0.922	3.106	1.073	0.403	4.731	3.182	3.081	0.198			sp|Q09799|KRI1_SCHPO	Protein kri1 OS=Schizosaccharomyces pombe
TRINITY_DN24881_c0_g1_i2	0	0	0.389	0.116	0.033	0	0.836	0.07	0.287	0.951	0.648	6.781	0.145	6.192	0.335	0.556	4.79	2.359	3.043	0
TRINITY_DN24884_c0_g1_i1	0.099	0	0.185	0	0.066	0	0	0	0	0.738	0.397	0.811	0	2.313	0.278	0.445	1.626	0.814	1.891	0.112			sp|Q6JQN1|ACD10_HUMAN	Acyl-CoA dehydrogenase family member 10
TRINITY_DN24885_c0_g1_i3	0	2.549	3.632	1.628	0.307	0.482	2.094	0.158	0.475	3.305	2.301	30.961	1.875	24.474	3.266	3.376	17.759	8.64	10.904	0.732
TRINITY_DN24886_c0_g1_i1	0.05	0.079	0.037	0.029	0	0	0.098	0	0	0.028	0.22	1.783	0	1.844	0.086	0	0.999	0.296	0.48	0
TRINITY_DN24887_c0_g1_i1	0	0.626	0.324	0.097	0.088	0.061	0.246	0.026	0.033	0.415	0.167	3.075	0.176	2.466	0.402	0.222	3.085	0.851	0.998	0
TRINITY_DN24891_c0_g1_i2	0	3.74	4.837	1.095	0.318	0	4.09	0.439	0.172	7.274	1.088	45.024	7.811	25.506	5.957	3.251	19.424	12.691	15.021	0
TRINITY_DN24891_c0_g1_i3	0	0.617	0.232	0.242	0.197	0	0.305	0.044	0.041	0.508	0.115	2.304	0.891	1.558	0.402	0.097	1.048	0.666	1.747	0
TRINITY_DN24909_c0_g2_i2	0	0.591	0.259	0.233	0	0.225	0.61	0	0.066	0.618	0.439	6.921	0.186	5.342	0	0.417	2.214	1.489	2.64	0.124			sp|B8P366|MDM10_POSPM	Mitochondrial distribution and morphology
TRINITY_DN24910_c0_g1_i2	0	0	0	0.291	0	0	0	0	0	0.369	0.23	0.711	0.414	0.497	0.364	0	0.245	0.888	0.317	0			sp|O00092|PHYA_ASPFU	3-phytase A OS=Neosartorya fumigata (strain
TRINITY_DN24910_c0_g1_i3	0.199	3.828	6.504	2.054	0.679	0.256	3.549	0.527	0.377	8.843	1.6	32.073	5.211	19.695	7.383	2.848	28.357	14.134	11.115	0.509			sp|O00092|PHYA_ASPFU	3-phytase A OS=Neosartorya fumigata (strain
TRINITY_DN24911_c0_g1_i1	0.282	18.206	10.016	5.019	1.862	0.769	4.749	0.545	1.451	9.591	5.459	96.168	3.698	136.74	7.68	6.876	73.013	25.068	29.39	1.116
TRINITY_DN24918_c0_g1_i1	0	0	0	0	0	0	0.128	0	0	0	0.753	3.366	0	4.988	0	0	0.607	0.453	0.288	0
TRINITY_DN24918_c0_g1_i2	0	0.37	2.27	0	0	0	2.586	0	0.762	5.225	5.093	70.977	0.363	70.124	2.298	5.459	97.354	19.999	19.609	0			sp|P38773|DOG2_YEAST	2-deoxyglucose-6-phosphate phosphatase 2
TRINITY_DN24923_c0_g1_i1	0	0.168	0	1.589	0	0.02	0	0.387	0.025	0	3.179	0	1.098	21.645	10.678	3.82	25.859	20.795	13.515	0.012			sp|P0CX50|RL18B_YEAST	60S ribosomal protein L18-B OS=Saccharomyces
TRINITY_DN24923_c0_g1_i6	1.06	43.981	128.558	24.495	6.692	0.072	45.631	5.053	2.09	150.783	6.87	519.574	73.075	141.996	91.474	19.643	271.677	208.03	273.074	4.515			sp|P0CX50|RL18B_YEAST	60S ribosomal protein L18-B OS=Saccharomyces
TRINITY_DN24938_c0_g1_i1	0	1.041	2.418	0.223	0	0	1.868	0	0.107	2.935	0.303	21.255	0.425	19.504	2.298	0.722	18.248	3.441	7.084	0
TRINITY_DN24941_c0_g1_i2	0.124	1.12	2.937	1.221	0.208	0	1.445	0	0.221	4.708	2.07	27.325	1.668	17.058	4.118	0.486	16.485	6.549	8.965	0.285
TRINITY_DN24946_c0_g1_i1	0.041	1.12	1.418	0.998	0.241	0.041	1.376	0.123	0.115	2.695	1.098	18.52	1.077	7.807	2.097	1.181	14.673	7.465	6.114	0.186			sp|Q70DU8|AL3H1_ARATH	Aldehyde dehydrogenase family 3 member
TRINITY_DN24960_c0_g1_i1	0.041	0.812	0.658	0.126	0.055	0	0.423	0.026	0	0.674	0.45	5.619	0.28	3.001	0.46	0.278	4.055	2.072	1.718	0
TRINITY_DN24962_c0_g1_i1	0	0	0	0	0	0	0	0	0	0	0	0.431	0.269	0.287	0.144	0	0.715	0.712	0.403	0			sp|E3KWE1|TRM5_PUCGT	tRNA (guanine(37)-N1)-methyltransferase
TRINITY_DN24962_c0_g1_i3	0	0.45	2.752	0.223	0.186	0	0.767	0.088	0	3.72	0.251	13.001	0.673	4.616	1.628	0.208	7.836	5.541	3.955	0			sp|E3KWE1|TRM5_PUCGT	tRNA (guanine(37)-N1)-methyltransferase
TRINITY_DN24964_c0_g1_i1	0	0	0	0.097	0	0	0	0	0	0	0	2.274	0	0.879	0.508	0.181	1.665	0.685	1.181	0
TRINITY_DN24968_c0_g1_i3	0.116	0	0.028	0	0	0	0.324	0	0	1.652	0.544	4.447	0.508	1.137	0.91	0	3.565	1.6	1.795	0
TRINITY_DN24970_c0_g1_i1	0	1.147	2.27	0.494	0.241	0.318	0.964	0.053	0.131	3.277	0.774	8.734	2.01	6.059	1.513	0.514	6.083	4.468	3.619	0.198			sp|Q67XX3|FB252_ARATH	F-box protein At5g06550 OS=Arabidopsis
TRINITY_DN24971_c0_g1_i1	0	0.379	0.5	0.107	0	0.164	0.216	0	0	0.738	0.063	2.855	0.104	3.851	0.737	0.306	2.145	0.823	0.336	0.087
TRINITY_DN24975_c0_g1_i2	0.058	3.193	9.757	2.238	1.084	0.123	3.618	0.422	0.32	14.381	1.631	46.877	6.578	15.443	6.186	1.792	27.24	20.739	22.662	0.558			sp|P50514|ARLZ_SCHPO	Probable argininosuccinate lyase OS=Schizosaccharomyces
TRINITY_DN24980_c0_g1_i3	0.075	2.373	4.364	0.504	0.285	0	2.488	0	0	4.458	1.903	27.185	1.171	17.889	2.356	1.945	20.668	8.631	10.328	0.087			sp|O14295|PLR1_SCHPO	Pyridoxal reductase OS=Schizosaccharomyces
TRINITY_DN24987_c0_g1_i2	0	0.415	1.001	0.378	0	0	0.216	0.044	0.033	1.071	0.23	4.608	0.622	3.125	0.651	0.445	3.418	2.007	1.872	0.186
TRINITY_DN24990_c0_g1_i3	0	0.053	0	0.029	0	0	0.079	0.018	0.025	0.065	0	0.341	0.021	0.745	0.019	0.069	0.49	0.268	0.192	0
TRINITY_DN24997_c0_g1_i2	0	1.032	4.271	0.872	0.23	0.287	1.445	0.352	0.246	4.523	0.439	15.005	2.849	6.317	2.662	0.806	8.972	6.373	5.961	0.471			sp|P33313|CNS1_YEAST	Hsp70/Hsp90 co-chaperone CNS1 OS=Saccharomyces
TRINITY_DN25006_c0_g1_i1	0	0	0	0	0	0	0	0	0	0	0	2.023	0	1.281	0.402	0	1.185	0.749	0	0
TRINITY_DN25010_c0_g1_i3	0.398	5.39	10.683	0.824	0.635	0	3.353	0	0	9.868	5.302	89.978	3.978	48.861	8.102	4.473	39.151	18.871	25.676	0.124
TRINITY_DN25013_c0_g1_i1	0	2.038	6.282	1.211	0.427	0.215	1.347	0.141	0.254	5.28	0.847	17.809	7.79	6.049	1.762	1.556	7.356	7.539	11.873	0.93
TRINITY_DN25014_c0_g1_i2	1.921	127.011	152.435	28.894	9.715	3.73	51.274	5.783	5.401	154.373	28.475	506.633	134.413	374.624	77.579	39.994	210.429	168.651	255.01	11.993			sp|P58234|RS19A_SCHPO	40S ribosomal protein S19-A OS=Schizosaccharomyces
TRINITY_DN25014_c0_g1_i3	0	0	0.232	0.174	0	0	0	0	0	0.72	0	2.294	0.995	1.797	0	0	0.656	0.823	1.046	0			sp|P79016|RS19B_SCHPO	40S ribosomal protein S19-B OS=Schizosaccharomyces
TRINITY_DN25016_c0_g1_i1	0	0.3	0.695	0.068	0.197	0	0.413	0.097	0	1.643	0.241	7.833	0.611	1.72	0.785	0.389	7.64	4.079	4.07	0			sp|P78963|SKB1_SCHPO	Protein arginine N-methyltransferase skb1
TRINITY_DN25023_c0_g1_i2	0	1.799	2.437	0.62	0.307	0.123	1.426	0	0	5.631	0.439	15.686	2.517	4.243	2.921	0.736	10.285	8.39	7.295	0.347			sp|O74413|AROC_SCHPO	Chorismate synthase OS=Schizosaccharomyces
TRINITY_DN25025_c0_g1_i1	0	0.035	0.398	0.058	0	0	0.138	0	0.041	0.36	0.983	4.818	0.528	7.225	0.086	0.32	2.87	1.48	1.267	0			sp|Q51IZ9|ATG22_MAGO7	Autophagy-related protein 22 OS=Magnaporthe
TRINITY_DN25027_c0_g1_i4	0	0	0.38	0	0	0	0	0	0	0.295	0.638	1.272	0	3.918	0.086	0.278	0.891	0.167	0.422	0.05			sp|Q51548|PVDA_PSEAE	L-ornithine N(5)-monooxygenase OS=Pseudomonas
TRINITY_DN25029_c0_g1_i1	0	0.432	0.574	0.126	0.12	0.061	0.462	0	0	0.822	0.282	6.691	0.518	3.956	0.488	0.389	4.036	1.859	2.947	0
TRINITY_DN25031_c0_g1_i1	0	1.526	1.343	0.775	0.131	0	0.305	0.062	0.057	1.311	0.261	9.616	0.829	7.272	1.752	0	6.984	4.486	4.962	0
TRINITY_DN25031_c0_g1_i2	0	0	0	0	0	0	0.226	0	0	0	0.209	0.781	0	1.577	0.124	0.236	0.96	0.453	2.073	0
TRINITY_DN25032_c0_g1_i1	0	0	0	0	0	0	0	0	0	0.508	0	0	0	0	0	0.153	0.686	0.518	0.681	0
TRINITY_DN25035_c0_g1_i3	0	0	0	0	0	0.164	0	0	0	0	0.429	0.421	0.943	0.21	0.249	0.097	0	0.666	0.202	0
TRINITY_DN25038_c0_g1_i1	0.224	2.108	12.212	12.025	1.807	1.967	4.926	0.22	0.869	2.077	10.196	80.302	3.46	79.145	11.779	23.533	74.433	15.615	24.034	3.882
TRINITY_DN25038_c0_g2_i1	0.124	0.221	4.355	5.562	0.832	0.123	3.51	0.158	0.221	1.265	1.694	44.914	0.963	26.557	5.152	6.557	86.765	10.869	16.596	0.571
TRINITY_DN25041_c0_g1_i1	0	1.447	0.63	0.087	0.329	0.133	0.315	0.026	0.098	0.674	0.397	7.903	0.373	7.033	0.364	0.208	3.497	1.896	1.325	0.05
TRINITY_DN25042_c0_g1_i1	0	0.556	0.76	0.194	0.033	0	0.246	0.018	0.041	0.858	0.303	5.168	0.29	2.083	0.479	0.278	2.762	1.748	1.852	0.025
TRINITY_DN25043_c0_g1_i2	0	2.011	4.114	0.969	0.263	0.184	1.77	0.114	0.213	5.88	0.952	18.761	3.242	9.174	3.476	1.556	12.587	8.492	9.464	0.459			sp|Q9HGM9|DNJC7_SCHPO	DnaJ homolog subfamily C member 7 homolog
TRINITY_DN25044_c0_g1_i1	0	0.097	0.093	0.349	0.022	0	0.187	0.026	0.066	0.166	0.68	1.182	0.114	2.953	0.192	1.209	0.921	0.685	0.298	0
TRINITY_DN25046_c0_g1_i1	0.099	1.297	0	0	0.131	0	0.551	0	0.057	2.409	0.293	7.913	2.072	8.008	0.661	0.889	6.847	3.145	2.793	0
TRINITY_DN25047_c0_g1_i1	0	0	0	0	0	0	0.049	0	0	0.138	0	1.062	0	0.831	0.144	0	0.588	0.204	0.25	0
TRINITY_DN25048_c0_g1_i1	0	0.079	0.417	0.097	0.044	0	0.226	0	0.074	0.203	0.209	1.482	0.394	2.093	0.249	0	0.715	0.231	0.566	0
TRINITY_DN25049_c0_g1_i1	0	0.573	1.316	0.329	0.088	0.061	0.619	0.035	0.041	1.145	0.167	6.26	0.746	6.823	0.594	0.486	3.987	2.35	3.187	0.149			sp|Q9CWY8|RNH2A_MOUSE	Ribonuclease H2 subunit A OS=Mus musculus
TRINITY_DN25049_c0_g1_i3	0	0.097	0	0	0.033	0	0.128	0	0.082	0.12	0.241	1.322	0.114	0.44	0.306	0	0.225	0.305	0.154	0			sp|Q5U209|RNH2A_RAT	Ribonuclease H2 subunit A OS=Rattus norvegicus
TRINITY_DN25056_c0_g1_i2	0.066	0.75	3.447	2.083	0	0.133	0	0.079	0.221	4.901	0.648	13.452	2.807	5.199	1.484	2.209	5.152	4.958	7.103	0.434			sp|Q9P6P9|PDK_SCHPO	[Pyruvate dehydrogenase (acetyl-transferring)]
TRINITY_DN25059_c0_g1_i2	0	0	0.537	0	0.044	0	0	0	0	0.388	0.199	4.247	0	1.109	0.565	0	2.047	0.231	1.133	0.211
TRINITY_DN25060_c0_g1_i1	0	0.547	0.389	0.329	0	0	0.708	0	0.18	0	0.732	4.918	0.611	8.323	0.287	0.764	4.594	1.378	1.881	0			sp|Q8LGM7|MOCOS_SOLLC	Molybdenum cofactor sulfurase OS=Solanum
TRINITY_DN25060_c0_g1_i2	0.05	1.085	1.232	0.397	0.153	0.143	0.541	0.114	0	1.717	0.617	7.162	0.725	7.54	1.666	0.972	8.022	3.034	2.64	0.099			sp|Q8LGM7|MOCOS_SOLLC	Molybdenum cofactor sulfurase OS=Solanum
TRINITY_DN25067_c0_g1_i1	0	4.931	11.85	2.655	1.457	0.102	5.811	0.422	0.221	19.237	2.353	55.471	8.132	12.853	9.213	2.084	37.094	28.759	25.042	1.104			sp|Q9Y823|HOSM_SCHPO	Homocitrate synthase, mitochondrial OS=Schizosaccharomyces
TRINITY_DN25071_c0_g1_i1	0.025	0.591	0.565	0.107	0.033	0.051	0.226	0.044	0.041	0.425	0.178	1.833	0.135	1.72	0.632	0.431	1.881	1.147	0.758	0.149
TRINITY_DN25083_c0_g1_i4	0	1.438	2.483	0.514	0.482	0.328	1.367	0	0.123	2.557	1.108	10.016	3.325	5.848	0.919	0.57	3.546	3.598	4.041	0.682			sp|Q02081|LAC4_THACU	Laccase-4 OS=Thanatephorus cucumeris GN=LCC4
TRINITY_DN25085_c0_g1_i2	0	1.358	2.789	0.833	0.274	0.061	2.114	0.193	0.246	3.452	1.6	15.215	2.611	13.646	2.212	1.153	8.923	6.605	6.853	0.136			sp|P82922|RT29_BOVIN	28S ribosomal protein S29, mitochondrial
TRINITY_DN25096_c0_g1_i4	2.228	133.336	223.455	36.191	18.324	4.365	67.212	7.163	4.639	238.982	34.822	730.551	173.261	417.876	104.192	49.51	358.991	263.365	358.384	14.25			sp|P0CU28|RS24_CHATD	40S ribosomal protein S24 OS=Chaetomium
TRINITY_DN25101_c0_g1_i3	0	2.876	2.353	0.959	0.055	0	1.16	0.079	0.262	2.954	1.056	14.133	2.497	10.321	1.915	1.042	5.603	4.856	5.653	0.087			sp|P0CP16|NDC80_CRYNJ	Probable kinetochore protein NDC80 OS=Cryptococcus
TRINITY_DN25117_c0_g1_i1	0.091	1.455	1.927	0.3	0.131	0.051	0.796	0.123	0.082	2.012	0.303	7.232	1.15	4.587	1.226	0.736	4.398	2.414	2.371	0.112
TRINITY_DN25121_c0_g1_i2	1.201	13.769	19.596	7.5	1.533	0.666	8.583	0.835	1.041	18.618	5.5	71.618	14.058	56.2	13.694	8.96	43.157	27.843	30.273	1.488			sp|Q10422|YDC1_SCHPO	Uncharacterized RNA-binding protein C25G10.01
TRINITY_DN25121_c0_g1_i4	0	0	0	0	0	0	0.206	0	0	0.72	0.565	1.833	0	0	0.038	0	0.206	2.276	1.277	0			sp|Q10422|YDC1_SCHPO	Uncharacterized RNA-binding protein C25G10.01
TRINITY_DN25125_c0_g1_i1	0	1.297	1.918	0.669	0.383	0	0.914	0.044	0.074	2.732	0.356	10.828	1.388	2.227	0.919	0.903	5.73	4.153	5.183	0.223
TRINITY_DN25133_c0_g1_i1	0	0.335	0.195	0.087	0	0	0.344	0.035	0.148	0.545	0.345	1.442	0.031	2.733	0.23	0.083	1.606	0.74	1.008	0
TRINITY_DN25133_c0_g2_i1	0	0.115	0.102	0.048	0	0	0.138	0	0.074	0.166	0.209	2.714	0	2.676	0.163	0	3.605	0.694	0.451	0.074
TRINITY_DN25142_c0_g1_i5	0	2.981	2.14	1.008	0.219	0.205	1.386	0.123	0.082	2.723	0.857	14.404	1.834	11.152	2.653	3.153	8.277	4.394	5.797	0.149			sp|P45478|PPT1_BOVIN	Palmitoyl-protein thioesterase 1 OS=Bos
TRINITY_DN25144_c0_g1_i2	0.166	3.705	9.164	1.676	0.504	0.348	3.569	0.167	0.148	8.889	2.75	37.121	4.496	26.05	5.698	1.973	30.727	15.541	14.234	1.067			sp|Q9SE42|RPE1_ORYSJ	Ribulose-phosphate 3-epimerase, cytoplasmic
TRINITY_DN25155_c0_g1_i1	0	0	0	0	0	0	0	0	0	0.212	0.387	1.653	0	0.851	0	0	0.901	0.638	0	0			sp|Q8K2U2|ALKB6_MOUSE	Alpha-ketoglutarate-dependent dioxygenase
TRINITY_DN25155_c0_g1_i3	0	0	0.315	0	0	0	0.275	0	0	0.462	0	1.092	0.342	4.004	0.249	0	2.135	0.768	0.787	0			sp|Q8K2U2|ALKB6_MOUSE	Alpha-ketoglutarate-dependent dioxygenase
TRINITY_DN25156_c0_g1_i1	0	0	0	0	0	0	0	0	0	0	0	0	0.155	1.357	0.326	0	0.215	0.093	0.71	0
TRINITY_DN25175_c0_g1_i2	0	0	0.315	0	0	0	0.167	0	0	0.231	0.784	0.932	0	0.698	0.22	0	0.989	0.25	0.547	0.273			sp|P32390|ARP3_SCHPO	Actin-related protein 3 OS=Schizosaccharomyces
TRINITY_DN25185_c0_g1_i1	0	0.053	0.259	0	0	0	0.059	0	0.057	0.323	0.073	1.623	0	1.634	0.153	0.097	1.567	0.62	0.825	0
TRINITY_DN25185_c0_g1_i2	0.033	5.134	5.865	1.87	0.175	0.041	3.127	0.141	0.295	6.249	3.367	59.277	2.372	45.182	4.961	3.417	32.138	14.541	16.269	0.471
TRINITY_DN25188_c0_g1_i3	0	0	0	0	0	0	0	0	0	0.185	0	1.573	0.508	1.214	0.019	0	1.146	0.083	0	0
TRINITY_DN25188_c0_g1_i5	0	0	0	0	0	0	0.02	0	0	0.674	0	0.952	0.238	0.726	0	0	0.284	0.342	0	0
TRINITY_DN25188_c0_g1_i7	0	1.367	0	0.213	0.241	0	0.501	0	0.131	0.932	0.742	3.806	0.052	4.329	0.929	0.361	3.036	1.869	3.494	0.236
TRINITY_DN25192_c0_g1_i2	0	0.459	0.927	0.223	0	0.061	0.482	0	0.139	0.988	0.596	6.651	0.445	3.689	0.9	0.486	4.956	1.952	2.006	0			sp|P0CN58|EPL1_CRYNJ	Enhancer of polycomb-like protein 1 OS=Cryptococcus
TRINITY_DN25195_c0_g1_i2	0	0.229	0	0	0	0	0	0	0	0	0.774	0.541	0	0.65	1.436	0	0.147	0.278	1.065	2.183
TRINITY_DN25198_c0_g1_i2	0	0	0	0	0	0	0	0	0	0.886	0	2.384	0.901	2.026	0	1.111	3.507	1.082	0.941	0
TRINITY_DN25198_c0_g1_i5	0	0	0	0	0	0	0	0	0	0.618	0	0.391	0.259	0.898	0	0	0.46	0.204	0	0
TRINITY_DN25253_c0_g1_i1	0	0.3	0.398	0	0	0	0	0	0.074	0.314	0.094	3.866	0.104	1.959	0.316	0	0.549	0.796	0.749	0.136
TRINITY_DN25281_c0_g1_i2	0	0.256	0.565	0.155	0	0.184	0.492	0	0	0.637	0.136	3.215	0.59	0.803	0.575	0.139	4.114	1.785	0.998	0			sp|Q20035|TMCO4_CAEEL	Uncharacterized membrane protein F35D11.3
TRINITY_DN25282_c0_g1_i1	0	0.353	0.788	0.213	0.066	0.061	0.708	0	0.057	0.785	0.491	4.047	0.518	3.02	0.967	0.597	3.556	2.174	1.008	0.136
TRINITY_DN25283_c0_g1_i1	0.414	1.852	1.13	1.163	0.088	0.256	0.757	0.079	0.197	0.415	1.945	13.953	0.497	16.074	1.752	2.209	12.851	1.869	3.897	0.236			sp|P24867|PCL1_YEAST	PHO85 cyclin-1 OS=Saccharomyces cerevisiae
TRINITY_DN25288_c0_g1_i1	0.116	2.091	2.817	0.514	0.088	0	0.944	0.237	0.213	3.12	1.506	11.789	0.373	12.261	2.595	1.111	17.132	6.54	7.631	0			sp|P82476|CDA_CRYNH	Chitin deacetylase OS=Cryptococcus neoformans
TRINITY_DN25291_c0_g1_i1	0	0	0	0	0	0	0.167	0	0	0.286	0	1.282	0	0.43	0.278	0	1.557	1.027	0.298	0			sp|Q8LPN3|ADCS_ARATH	Aminodeoxychorismate synthase, chloroplastic
TRINITY_DN25298_c0_g1_i3	0	2.196	0	0.853	0.099	0	0.61	0.141	0.131	1.754	1.359	6.32	2.227	5.151	0.824	2.403	4.408	2.479	1.891	0.174			sp|Q5EA37|CC130_BOVIN	Coiled-coil domain-containing protein 130
TRINITY_DN25311_c0_g1_i1	0.141	2.064	3.984	1.298	0.854	0.297	2.851	0.422	0.361	6.406	1.401	27.034	4.869	19.858	3.898	1.042	16.27	9.352	12.036	0.161
TRINITY_DN25315_c0_g1_i1	0.083	2.787	4.021	0.969	0.23	0.441	1.681	0.387	0.049	5.935	0.816	15.215	2.735	11.066	2.988	1.111	8.776	6.54	5.394	1.178			sp|Q3ZBR5|TTC1_BOVIN	Tetratricopeptide repeat protein 1 OS=Bos
TRINITY_DN25316_c0_g1_i1	0	0	0	0	0	0	0	0	0	0	0	1.292	0	0	0	0.82	1.215	0.648	2.102	0			sp|A6QQW0|ZN143_BOVIN	Zinc finger protein 143 OS=Bos taurus GN=ZNF143
TRINITY_DN25316_c0_g1_i2	0.05	0.097	0.204	0.068	0	0	0.216	0	0.033	0.092	0.491	6.13	0.249	5.801	0.393	0	4.114	0.981	0	0.062			sp|A6QQW0|ZN143_BOVIN	Zinc finger protein 143 OS=Bos taurus GN=ZNF143
TRINITY_DN25320_c0_g1_i3	0.406	4.772	8.524	1.909	0.274	0.174	3.481	0.334	0.303	9.286	2.572	30.059	5.812	17.832	4.376	3.07	17.935	12.016	13.601	0.868			sp|Q9USM4|LUC7_SCHPO	U1 snRNP-associated protein usp106 OS=Schizosaccharomyces
TRINITY_DN25323_c0_g1_i3	0	1.023	1.844	0.368	0.11	0	0.964	0	0.09	2.068	0.837	10.617	1.026	7.053	1.465	0.431	6.67	2.923	4.329	0			sp|Q9Y706|CYB5_MORAP	Cytochrome b5 OS=Mortierella alpina PE=1
TRINITY_DN25325_c0_g1_i3	0	0	0.102	0.048	0.142	0	0.088	0	0.033	0.305	0.084	0.952	0.528	0.354	0.163	0	0.323	0.231	0.442	0
TRINITY_DN25335_c0_g1_i2	0	1.217	1.899	1.114	0.23	0	1.268	0.185	0.246	2.723	1.035	12.05	1.15	8.113	2.404	2.139	8.581	5.661	8.389	0.136			sp|O74352|HOB1_SCHPO	Protein hob1 OS=Schizosaccharomyces pombe
TRINITY_DN25336_c0_g1_i2	0	2.814	2.502	0.562	0.296	0.072	1.327	0.141	0.172	3.48	1.339	13.923	2.486	10.76	2.078	1.792	7.875	5.818	7.093	0.087			sp|Q07326|PIGF_HUMAN	Phosphatidylinositol-glycan biosynthesis
TRINITY_DN25339_c0_g1_i1	0.754	0.079	0.111	0.291	0.088	0	0.914	0.308	0.41	0	1.537	22.347	0.031	22.314	1.006	2.501	36.301	4.348	5.596	0.161			sp|Q01200|PRIA_LENED	Protein priA OS=Lentinula edodes GN=priA
TRINITY_DN25344_c0_g1_i4	0	0	0.352	0	0	0	0.108	0.07	0.008	1.412	0.021	2.564	0.218	0	0.68	0	3.683	2.146	1.545	0
TRINITY_DN25346_c0_g1_i1	0	2.69	1.872	0.891	0.164	0.174	1.18	0	0.098	2.022	0.742	18.08	1.637	9.614	1.609	1.084	9.149	5.717	5.73	0.198			sp|P53332|COAD_YEAST	Phosphopantetheine adenylyltransferase OS=Saccharomyces
TRINITY_DN25347_c0_g1_i1	0.058	0.847	1.214	0.591	0.153	0.061	0.944	0.141	0.066	2.049	0.094	8.173	0.974	6.995	1.494	0.583	6.494	3.857	3.167	0.198
TRINITY_DN25348_c0_g1_i1	0.05	0.847	1.288	0.368	0.142	0.164	0.403	0.035	0.213	1.698	0.586	6.32	0.943	5.342	1.58	1.889	3.164	2.026	2.294	0.124			sp|P34164|SIP2_YEAST	SNF1 protein kinase subunit beta-2 OS=Saccharomyces
TRINITY_DN25349_c0_g1_i3	0	0	0.287	0.126	0	0	0.098	0	0.049	1.394	0	4.608	0.238	1.453	0.45	0.861	8.727	1.998	2.784	0
TRINITY_DN25354_c0_g1_i2	0	0.503	1.195	0.775	0.186	0.061	0.59	0.141	0	2.308	0.356	10.006	1.316	3.756	0.824	0.361	4.114	3.913	3.619	0.26			sp|Q09833|YAD7_SCHPO	tRNA (uracil(54)-C(5))-methyltransferase
TRINITY_DN25354_c0_g1_i3	0	0	0	0	0	0	0	0	0.074	0.175	0	1.583	0	0.535	0.144	0	1.117	0.213	0.365	0			sp|Q09833|YAD7_SCHPO	tRNA (uracil(54)-C(5))-methyltransferase
TRINITY_DN25356_c0_g1_i2	0	0.088	0.12	0.019	0	0	0.039	0	0	0.166	0.094	1.222	0.021	0.554	0.163	0.042	1.136	0.62	0.653	0.037			sp|Q9C0V4|YOM2_SCHPO	Uncharacterized protein PB7E8.02 OS=Schizosaccharomyces
TRINITY_DN25358_c0_g1_i1	0	5.425	1.835	0.785	0.263	0.133	1.2	0.334	0.623	5.335	1.318	13.082	3.833	16.179	3.074	0.5	7.934	5.421	4.051	0.446
TRINITY_DN25366_c0_g1_i4	0	1.129	0	0.61	0	0	0	0	0	1.163	0	15.225	0.922	8.801	1.168	1.584	6.514	5.994	3.907	0			sp|P80667|PEX13_YEAST	Peroxisomal membrane protein PAS20 OS=Saccharomyces
TRINITY_DN25366_c0_g1_i5	0	0	0	0	0	0	0	0	0	0.766	0	0	0.3	0	0.335	0	1.43	0.352	0.49	0			sp|P80667|PEX13_YEAST	Peroxisomal membrane protein PAS20 OS=Saccharomyces
TRINITY_DN25371_c0_g1_i3	0.066	2.038	2.344	0.213	0.23	0.072	0.767	0.272	0.123	2.991	0.408	8.935	2.704	8.82	1.571	1.542	5.27	3.765	3.878	0.161			sp|Q5E9Q4|NECP2_BOVIN	Adaptin ear-binding coat-associated protein
TRINITY_DN25372_c0_g1_i1	0.364	21.637	30.317	9.409	1.961	1.506	13.047	1.424	0.942	35.843	8.826	127.369	26.562	79.154	19.373	10.724	69.702	49.286	58.397	2.108			sp|Q871K1|QCR7_NEUCR	Cytochrome b-c1 complex subunit 7 OS=Neurospora
TRINITY_DN25384_c0_g1_i2	0.133	0.256	0.815	0	0.033	0	1.711	0	0.082	1.883	2.008	33.074	0.383	24.588	0.948	0.695	40.836	9.852	8.725	0			sp|P25340|ERG4_YEAST	Delta(24(24(1)))-sterol reductase OS=Saccharomyces
TRINITY_DN25402_c0_g1_i2	0.05	2.011	3.391	1.085	0.515	0.297	1.76	0.088	0.172	3.554	1.035	20.113	2.693	16.427	2.71	0.875	10.99	7.594	7.41	0.223			sp|Q9Y7J4|ARPC3_SCHPO	Actin-related protein 2/3 complex subunit
TRINITY_DN25403_c0_g1_i2	0.29	12.552	13.741	2.422	1.774	0.605	5.899	0.615	0.975	17.234	4.591	61.942	13.312	50.906	10.869	6.737	39.435	26.123	29.813	0.893			sp|O59905|PDX1_CERNC	Pyridoxal 5'-phosphate synthase subunit
TRINITY_DN25410_c0_g1_i3	0.066	4.066	5.328	1.114	0.493	0.174	2.615	0.193	0.221	5.492	1.537	25.332	4.082	19.237	3.515	1.361	13.341	8.177	11.345	0.236			sp|Q2KJ44|PTPA_BOVIN	Serine/threonine-protein phosphatase 2A
TRINITY_DN25416_c0_g2_i1	0	1.12	1.177	0.349	0.077	0.082	0.875	0.044	0.09	1.791	0.481	6.36	0.963	4.73	0.977	0.681	4.8	2.257	3.35	0.136
TRINITY_DN25417_c0_g1_i3	0	0.635	0.908	0.087	0	0	0.265	0.026	0.025	0.997	0.868	12.14	0.559	5.036	0.527	0.986	5.084	2.803	3.513	0			sp|Q9P7J8|GAD8_SCHPO	Serine/threonine-protein kinase gad8 OS=Schizosaccharomyces
TRINITY_DN25421_c1_g1_i1	0	0.326	9.979	9.757	2.881	1.691	7.512	0.413	0.639	2.982	1.715	95.908	0.704	51.996	10.544	7.057	161.257	29.61	29.803	0
TRINITY_DN25425_c0_g2_i2	0.456	5.539	14.037	2.645	0.876	0.553	4.444	0.369	0.197	18.184	3.127	62.653	11.281	26.834	10.515	4.029	40.591	26.382	30.945	1.327			sp|Q4P733|DED1_USTMA	ATP-dependent RNA helicase DED1 OS=Ustilago
TRINITY_DN25426_c0_g1_i3	0.083	4.084	6.773	2.539	0.263	0.328	3.304	0.721	0.336	8.483	1.213	37.001	5.149	21.97	3.629	1.347	21.06	14.329	17.066	0.496
TRINITY_DN25434_c0_g1_i4	0	0.52	3.382	0.756	0.066	0.092	1.396	0.062	0	3.849	0.638	13.102	1.419	3.861	2.614	1.056	9.638	5.43	5.865	0.223		Metallo_Peptidases=EAK82654	sp|A3KG59|P20D2_MOUSE	Peptidase M20 domain-containing protein
TRINITY_DN25435_c0_g1_i1	0	0	0.167	0	0	0	0	0	0.057	0.065	0.084	0.881	0	0.468	0.029	0.597	1.724	0.731	0.538	0			sp|P07046|3SHD_NEUCR	3-dehydroshikimate dehydratase OS=Neurospora
TRINITY_DN25437_c0_g1_i3	0	0.397	0.389	0.078	0	0	0.433	0	0.123	0	0	3.766	0.093	3.928	0.297	1.028	3.379	2.266	1.757	0
TRINITY_DN25437_c0_g1_i4	0	0	0.102	0.068	0.088	0	0.147	0.044	0	0.249	0	1.422	0.073	0.535	0.201	0.083	1.313	0.231	0.384	0			sp|Q09779|THO2_SCHPO	THO complex subunit 2 OS=Schizosaccharomyces
TRINITY_DN25437_c0_g2_i1	0	0	0.25	0.436	0	0.246	0.383	0	0	2.058	0.314	10.137	0.673	1.242	1.14	0.097	2.439	1.323	1.891	0.174
TRINITY_DN25450_c0_g1_i3	0.282	18.621	25.35	5.029	1.698	0.574	10.265	0.729	1.008	21.221	5.532	84.92	23.215	80.808	13.982	9.558	44.107	31.738	39.545	1.451
TRINITY_DN25457_c0_g2_i2	0.182	19.247	15.483	5.203	0.624	0.379	9.37	0.967	0.664	17.215	7.77	93.924	12.348	64.256	8.245	4.598	37.907	23.413	31.703	0.422			sp|P80584|TBCA_RABIT	Tubulin-specific chaperone A OS=Oryctolagus
TRINITY_DN25458_c0_g1_i1	0	0	0	0	0	0	0	0	0	0	0.899	6.461	0.135	0	0.45	0.5	4.467	3.358	0.883	0
TRINITY_DN25458_c0_g1_i2	0	0.185	0.12	0	0	0	0.216	0	0	0.951	0.742	4.047	0.466	3.45	0.211	1.042	5.133	1.989	1.401	0
TRINITY_DN25458_c0_g1_i3	0	0	0.13	0	0	0	0.57	0.105	0.287	0.886	1.464	6.711	0.228	5.304	0.843	0.25	6.142	5.208	3.033	0
TRINITY_DN25470_c0_g1_i1	0	10.126	10.387	2.161	1.161	0.246	2.832	0.492	0.443	9.618	4.204	39.795	11.105	42.564	2.729	3.765	16.72	10.527	20.128	0.843			sp|P0CP04|MZT1_CRYNJ	Mitotic-spindle organizing protein 1 OS=Cryptococcus
TRINITY_DN25475_c0_g1_i4	0	0	0.102	0	0.022	0	0.069	0	0.016	0	0.157	1.142	0.104	0.306	0.105	0.125	0.637	0	0.307	0
TRINITY_DN25476_c0_g1_i1	0.033	0.794	0.973	0.388	0.099	0.031	0.649	0.035	0.082	2.132	0.188	7.252	0.756	3.622	1.226	0.486	7.366	3.589	4.06	0.062			sp|P0CM96|CWC22_CRYNJ	Pre-mRNA-splicing factor CWC22 OS=Cryptococcus
TRINITY_DN25477_c0_g1_i3	0	0	0.167	0	0	0	0	0	0	0.323	0	2.043	0	1.969	0	0.208	0.607	0.62	0.336	0
TRINITY_DN25496_c0_g1_i1	0	0.185	0.834	0	0	0.082	0.246	0	0	1.597	0.178	4.147	1.16	2.972	0.144	0	1.92	1.554	1.085	0
TRINITY_DN25496_c0_g1_i2	0.356	1.985	2.567	1.085	0.12	0	1.573	0.229	0.27	2.668	1.83	13.122	0	10.55	2.49	2.459	9.07	4.801	6.421	0.211
TRINITY_DN25500_c0_g1_i2	0	1.694	0.871	0.291	0.11	0.174	0.118	0.158	0.098	0.637	0.805	6.421	0.746	7.158	0.661	1.084	4.124	3.034	2.592	0
TRINITY_DN25524_c0_g1_i2	0	2.655	0.982	0	0.164	0	0.521	0	0.139	2.446	0.931	13.672	2.559	9.528	2.365	1.375	6.729	4.838	4.982	0.099
TRINITY_DN25535_c0_g1_i1	0.199	2.223	5.911	1.851	0.46	0.195	2.379	0.176	0.164	6.286	0.69	16.958	5.024	6.89	3.945	1.556	12.371	8.908	6.181	0.633			sp|Q9LDU0|MTP7_ORYSJ	Metal tolerance protein 7 OS=Oryza sativa
TRINITY_DN25538_c0_g1_i1	0	1.826	4.466	1.55	0.252	0.236	1.563	0	0.27	3.425	1.203	17.659	1.575	11.343	1.867	1.57	12.636	6.956	7.103	0.695			sp|Q7RVX9|PHO5_NEUCR	Repressible high-affinity phosphate permease
TRINITY_DN25539_c0_g1_i1	0	0.812	0.778	0.174	0.077	0.041	0.541	0	0.049	1.163	0.387	6.641	0.332	3.249	0.948	0.639	4.937	2.063	2.841	0.186
TRINITY_DN25540_c0_g1_i1	0.24	2.637	4.938	1.638	0.164	0.502	4.061	0.316	0.434	6.489	2.813	36.7	3.408	26.251	4.578	0.292	21.275	12.719	12.555	0.695			sp|Q9P7N2|AP1S1_SCHPO	AP-1 complex subunit sigma-1 OS=Schizosaccharomyces
TRINITY_DN25541_c0_g1_i2	0	0	0	0	0	0	0	0	0	0	0	4.778	0	5.294	0	1	4.976	0.537	0	0			sp|C8ZJM1|AQY1_YEAS8	Aquaporin-1 OS=Saccharomyces cerevisiae
TRINITY_DN25557_c0_g1_i2	0	2.32	2.446	0.145	0.142	0	0.501	0.07	0	1.828	1.025	18.04	1.399	17.45	1.082	1.75	8.835	5.43	5.836	0
TRINITY_DN25561_c0_g1_i1	0.207	2.902	4.457	1.046	0.438	0.215	1.829	0.325	0.246	5.188	0.648	24.901	2.569	13.054	4.041	2.862	23.068	11.415	8.744	0.347
TRINITY_DN25562_c0_g1_i3	0.091	2.161	4.216	2.335	0.088	0.369	4.798	0.299	0.525	4.514	5.124	41.899	9.893	45.239	3.725	4.056	15.966	12.266	18.045	0			sp|Q12644|NDUS8_NEUCR	NADH-ubiquinone oxidoreductase 23 kDa subunit,
TRINITY_DN25564_c0_g1_i1	0.199	3.643	16.372	4.699	0.361	0	5.968	0.264	0.328	12.369	5.636	79.441	5.698	51.021	9.739	8.71	64.579	26.141	28.498	0.397
TRINITY_DN25566_c0_g1_i4	0.224	0.556	0.713	0	0	0	0	0	0	1.089	0.722	4.347	0.383	3.287	0.594	0.445	3.105	0.611	1.181	0			sp|Q05493|THIK_YARLI	3-ketoacyl-CoA thiolase, peroxisomal OS=Yarrowia
TRINITY_DN25571_c0_g1_i1	0.066	1.261	1.668	0.446	0.088	0	0.796	0.079	0.041	1.228	0.146	7.582	1.367	5.246	1.762	0.57	4.173	2.451	3.215	0
TRINITY_DN25575_c0_g1_i1	0	0	0	0	0	0	0	0	0	0.323	0	0.401	0	0	0.335	0	1.175	0.324	0.49	0
TRINITY_DN25575_c0_g1_i2	0.075	1.032	3.095	1.017	0.066	0.154	0.924	0.053	0.123	2.751	0.826	16.297	0.632	7.769	1.781	1.028	13.566	8.224	8.706	0.347
TRINITY_DN25583_c0_g1_i2	0	0.071	0	0.087	0	0.031	0	0	0	0.083	0.094	0.341	0.041	1.175	0.077	0	0.5	0.213	0.154	0
TRINITY_DN25585_c0_g4_i1	0	0.238	0.241	0.068	0.099	0	0.138	0.035	0	0.618	0.157	1.382	0.321	1.634	0.124	0.194	1.293	0.49	0.816	0.223
TRINITY_DN25589_c0_g1_i1	0	1.076	0.445	0.475	0.153	0.225	0.079	0.141	0	0.637	0.805	1.843	1.108	4.186	0.354	1.875	2.047	1.351	2.62	0
TRINITY_DN25594_c0_g1_i1	0	0	0.269	0	0	0	0	0	0	0	1.872	1.072	0	3.421	0	0.361	3.036	0.962	0.307	0
TRINITY_DN25598_c0_g3_i1	0	0.662	1.436	0.795	0.077	0.072	0.747	0.07	0.213	1.486	0.523	8.183	0.725	6.403	0.881	0.375	4.555	2.71	3.859	0.087
TRINITY_DN25617_c0_g1_i1	0.066	2.099	1.872	0.484	0.153	0.123	1.121	0.149	0.066	4.163	0.586	13.021	1.388	6.46	1.676	0.931	11.127	6.466	5.481	0.136		Serine_Peptidases	sp|P53621|COPA_HUMAN	Coatomer subunit alpha OS=Homo sapiens GN=COPA
TRINITY_DN25618_c0_g1_i2	2.294	3.555	5.68	1.541	1.435	0	13.696	1.397	2.664	3.701	18.112	283.486	1.233	343.251	11.252	40.689	260.168	43.079	61.862	1.836
TRINITY_DN25620_c0_g1_i3	0.224	0	0.519	0.242	0	0	0	0	0	0.157	0	5.289	0	3.928	0.393	1.097	4.261	1.536	4.185	0			sp|Q8T3C8|MTFP1_CAEEL	Mitochondrial fission process protein 1
TRINITY_DN25623_c0_g1_i1	0	2.108	8.005	1.192	0	0	2.301	0	0.377	10.883	5.061	83.127	2.269	59.383	3.017	2.334	86.197	28.223	24.207	0.124
TRINITY_DN25631_c0_g1_i2	0	0	0	0	0	0	0	0	0	0.249	0	1.382	0	2.943	0.622	0	0.333	0.463	0.413	0			sp|O14299|WIS4_SCHPO	MAP kinase kinase kinase wis4 OS=Schizosaccharomyces
TRINITY_DN25632_c0_g1_i2	0.05	0.794	1.047	0.494	0.099	0	0.914	0.035	0.123	1.855	0.565	7.582	1.088	5.524	1.12	1.042	5.73	2.923	1.766	0.062
TRINITY_DN25633_c0_g1_i1	0.083	2.602	2.307	0.61	0.11	0.246	1.082	0	0.213	2.982	1.851	23.779	0.611	16.303	1.647	1.695	15.055	7.234	6.402	0.136			sp|I1RF64|AURL2_GIBZE	Multicopper oxidase aurL2 OS=Gibberella
TRINITY_DN25640_c0_g1_i3	0	0	0.213	0	0	0	0.088	0	0	0.166	0	4.507	0	2.456	0	0.556	2.341	1.323	0.691	0			sp|I1RF64|AURL2_GIBZE	Multicopper oxidase aurL2 OS=Gibberella
TRINITY_DN25641_c0_g1_i1	0.041	2.011	1.668	0.475	0	0.051	1.416	0.062	0.049	2.372	0.544	8.294	2.062	8.859	1.59	0.875	5.309	4.024	3.311	0.161			sp|O14189|PP2C5_SCHPO	Protein phosphatase 2C homolog C10F6.17c
TRINITY_DN25642_c0_g1_i1	0.215	4.137	4.438	1.405	0.865	0.164	3.058	0.448	0.443	7.625	2.018	27.796	4.289	23.203	5.008	1.889	19.042	13.126	11.681	0.372			sp|Q4R4T0|RPN1_MACFA	Dolichyl-diphosphooligosaccharide--protein
TRINITY_DN25645_c0_g1_i4	0	0	0	0	0.044	0	0	0	0	0	0	2.154	0.145	0	0	0	1.548	0.879	0.998	0
TRINITY_DN25646_c0_g1_i1	0	0.45	1.149	0.271	0.12	0.092	0.334	0.114	0.025	1.006	0.241	3.335	1.108	1.777	0.661	0.278	1.606	0.888	1.161	0.347			sp|Q9P8P4|PLB2_ASPFU	Lysophospholipase 2 OS=Neosartorya fumigata
TRINITY_DN25647_c0_g1_i1	0	0.115	1.621	0	0.12	0	0.256	0.105	0	1.431	0.146	5.729	0.953	2.322	1.398	0.236	6.866	3.071	4.3	0			sp|Q54EY2|EI2BB_DICDI	Translation initiation factor eIF-2B subunit
TRINITY_DN25647_c0_g1_i2	0.108	2.02	0.695	0.523	0.055	0.051	0.846	0	0.221	1.948	0.774	9.746	1.554	6.861	0.297	0.917	0.891	2.081	0.662	0.36			sp|Q54EY2|EI2BB_DICDI	Translation initiation factor eIF-2B subunit
TRINITY_DN25649_c0_g1_i3	0.05	0	0	0	0.033	0	0.305	0.035	0.025	0.48	0.188	5.9	0	5.256	0.306	0.5	1.832	1.471	1.545	0.05
TRINITY_DN25651_c0_g1_i1	0.025	0.776	0.927	0.455	0.186	0.02	0.708	0.044	0.041	2.335	0.345	6.501	0.829	4.214	0.996	0.5	5.72	3.441	3.35	0.074			sp|P39730|IF2P_YEAST	Eukaryotic translation initiation factor
TRINITY_DN25660_c0_g1_i1	0.083	0.6	0.463	0.523	0.022	0.082	0.383	0.07	0.098	0.637	0.701	5.158	0.342	4.597	0.335	0.139	2.968	1.73	2.851	0.124
TRINITY_DN25675_c0_g1_i2	0.05	0.45	0.408	0.097	0.219	0	0.197	0.062	0.107	0.609	0.408	5.168	0.684	6.651	0.642	0.306	5.828	1.804	1.123	0.05
TRINITY_DN25677_c0_g1_i1	0.182	3.943	4.531	1.56	0.077	0.184	2.104	0.114	0	3.665	1.433	22.838	3.45	17.813	3.017	1.945	12.792	8.427	8.015	0.347			sp|Q2H991|FYV10_CHAGB	Protein FYV10 OS=Chaetomium globosum (strain
TRINITY_DN25677_c0_g1_i3	0	0	0	0	0	0	0	0	0	0.674	0	1.102	0	0	0.632	0	1.117	0.278	0.336	0			sp|Q2H991|FYV10_CHAGB	Protein FYV10 OS=Chaetomium globosum (strain
TRINITY_DN25678_c0_g1_i2	0.687	21.205	35.181	9.476	3.023	0.83	13.303	1.266	1.278	46.541	6.128	143.746	29.151	79.584	22.983	10.586	80.722	57.278	66.488	1.86			sp|P41920|YRB1_YEAST	Ran-specific GTPase-activating protein 1
TRINITY_DN25687_c0_g1_i2	0	2.549	0.732	0.62	0.099	0.051	0.492	0	0.057	2.317	0.324	7.372	1.005	7.177	1.235	0.528	5.133	2.766	3.705	0.174			sp|P40507|AIR1_YEAST	Protein AIR1 OS=Saccharomyces cerevisiae
TRINITY_DN25695_c0_g1_i2	0	0.123	0	0	0	0	0	0	0	0.323	0.157	2.134	0.974	0.296	0	0	0.382	0.379	0	0			sp|Q9HE74|RS23_NEUCR	40S ribosomal protein S23 OS=Neurospora
TRINITY_DN25695_c0_g1_i3	3.793	191.271	237.186	52.692	17.349	10.749	82.884	8.999	6.835	250.723	59.658	848.776	245.684	599.053	131.398	72.543	308.213	265.354	378.579	20.166			sp|Q9HE74|RS23_NEUCR	40S ribosomal protein S23 OS=Neurospora
TRINITY_DN25695_c0_g1_i4	0	0.45	0.704	0.223	0	0	0.737	0	0.197	0.674	1.067	6.651	2.393	3.211	0.785	0.445	1.42	1.267	4.185	0			sp|Q9HE74|RS23_NEUCR	40S ribosomal protein S23 OS=Neurospora
TRINITY_DN25695_c0_g1_i5	0	0	0	0	0	0	0	0	0	0.942	0	10.487	0.787	1.261	0	0	30.835	2.229	5.308	0.719			sp|Q9HE74|RS23_NEUCR	40S ribosomal protein S23 OS=Neurospora
TRINITY_DN25698_c0_g1_i1	0.24	10.32	24.109	3.362	3.483	0.574	9.193	1.318	0.328	35.649	1.861	91.691	16.503	31.717	14.403	4.362	57.38	41.839	55.479	0.645			sp|Q9P3U1|YKX5_SCHPO	Uncharacterized RNA-binding protein C328.05
TRINITY_DN25702_c0_g1_i1	0.091	0	0	0.194	0	0	0.256	0	0.115	0.48	0.439	3.356	0.041	3.593	0	0.222	1.077	0.592	0.998	0			sp|P49193|RALB_TODPA	Retinal-binding protein OS=Todarodes pacificus
TRINITY_DN25703_c0_g1_i1	0	3.123	2.529	0	0	0	0.934	0	0.082	2.963	1.38	25.031	2.062	36.476	0.766	0	12.969	2.831	10.241	0.149
TRINITY_DN25707_c0_g1_i1	0	1.641	3.66	0.795	0.591	0	2.143	0.22	0.262	5.668	0.868	23.128	2.642	6.794	2.892	0.764	16.691	11.544	11.268	0.335			sp|O43011|SYH_SCHPO	Histidine--tRNA ligase, mitochondrial OS=Schizosaccharomyces
TRINITY_DN25709_c0_g2_i1	0.05	0.503	0.408	0	0.033	0	0.197	0	0.025	0.554	0.22	1.833	0	2.695	0.268	0.361	1.783	1.536	0.921	0
TRINITY_DN25710_c0_g1_i1	0.091	1.076	1.686	0.145	0.088	0.02	0.875	0.062	0.041	2.622	0.722	14.564	0.87	10.263	1.695	1	14.125	5.92	5.471	0.112
TRINITY_DN25715_c0_g1_i1	0	0.106	0.259	0.087	0	0	0.206	0.018	0	0.24	0.021	1.482	0.052	0.373	0.22	0.153	2.958	1.323	0.662	0.074			sp|Q9P793|MIT1_SCHPO	Chromatin remodeling factor mit1 OS=Schizosaccharomyces
TRINITY_DN25715_c0_g1_i2	0.033	1.526	1.214	0.3	0.044	0.072	0.747	0.07	0.098	1.726	0.795	6.641	1.326	5.829	1.034	0.597	1.264	2.091	2.14	0.05			sp|Q9P793|MIT1_SCHPO	Chromatin remodeling factor mit1 OS=Schizosaccharomyces
TRINITY_DN25716_c0_g2_i1	0	0.37	0.139	0.087	0	0	0.128	0	0.164	0.231	0.627	5.269	0.145	4.358	0.268	0.306	3.477	1.249	1.373	0			sp|O94361|YHOE_SCHPO	Uncharacterized acyltransferase C428.14
TRINITY_DN25721_c0_g1_i2	0	0	0	0	0.088	0	0.216	0	0.049	0.683	0	0.851	0	3.507	0.45	0	0.97	0.574	0.797	0
TRINITY_DN25724_c0_g1_i1	0	4.56	6.43	1.715	0.635	0.133	2.153	0.246	0.115	8.354	1.474	25.121	6.837	9.537	2.634	1.486	11.607	11.036	16.855	0.806		Serine_Peptidases	sp|Q68FJ6|PK1IP_XENLA	p21-activated protein kinase-interacting
TRINITY_DN25727_c0_g1_i3	0	0	0	0	0	0	0	0	0	1.228	0.293	4.247	1.202	3.813	0.958	0	3.585	2.331	2.313	0			sp|Q8WZM0|GCN5_YARLI	Histone acetyltransferase GCN5 OS=Yarrowia
TRINITY_DN25732_c0_g1_i1	0	0	0	0	0	0	0	0	0	0	0	4.127	0	0	0.833	0	1.215	0	1.209	0
TRINITY_DN25732_c0_g1_i2	0	0.882	0.852	0.746	0.11	0.205	0.56	0.018	0.074	1.523	0.742	4.838	0.787	6.45	0	0.542	3.663	2.683	1.411	0.037
TRINITY_DN25733_c0_g1_i1	0	1.279	2.52	0.64	0	0.225	0.865	0.053	0.131	3.545	0.659	11.068	2.321	6.03	0.9	0.861	6.102	4.412	4.943	0.36			sp|Q9UU88|KAD6_SCHPO	Adenylate kinase isoenzyme 6 homolog OS=Schizosaccharomyces
TRINITY_DN25735_c0_g1_i1	0	0.273	0	0	0.055	0	0.265	0	0.09	0.489	0.241	6.18	0	2.704	0.249	0.5	7.415	1.082	1.43	0
TRINITY_DN25736_c0_g1_i1	0	1.614	2.789	1.124	0.34	0.133	1.376	0.123	0	5.225	0.857	15.996	2.248	5.342	2.375	1.07	7.288	5.883	7.141	0.074			sp|Q10498|HGH1_SCHPO	Protein HGH1 homolog OS=Schizosaccharomyces
TRINITY_DN25740_c0_g1_i1	0	0.547	0.454	0.31	0.077	0.02	0.374	0.123	0.057	0.905	0.23	3.806	0.528	3.068	0.373	0.292	4.378	1.97	1.737	0			sp|Q1K9C4|YFK7_SCHPO	Probable E3 ubiquitin protein ligase C167.07c
TRINITY_DN2574_c0_g1_i1	0	2.029	2.381	0.717	1.062	0.205	1.829	0.132	0	4.375	0.157	19.001	0.684	4.31	3.428	1.014	29.914	9.879	7.592	0.223
TRINITY_DN25792_c0_g1_i1	0.124	4.569	7.375	1.405	0.723	0.266	3.51	0.448	0.262	9.618	2.656	31.792	5.687	24.521	6.541	2	20.384	13.69	13.85	0.67			sp|E7QBZ1|KRR1_YEASZ	KRR1 small subunit processome component
TRINITY_DN25814_c0_g1_i2	0	4.499	6.18	0.64	0.372	0.236	1.671	0.149	0.205	3.821	1.265	20.684	6.071	16.915	4.147	1.889	11.872	8.631	10.673	0.26			sp|P53875|RM19_YEAST	54S ribosomal protein L19, mitochondrial
TRINITY_DN25815_c0_g1_i1	0	0.256	0.5	0.136	0	0	0.167	0.026	0.025	0.508	0.031	1.983	0.508	1.328	0.565	0.097	2.077	0.851	1.305	0.087
TRINITY_DN25815_c1_g2_i1	0	0.088	0.111	0	0	0	0.147	0	0	0.083	0.115	1.322	0.269	0.631	0.134	0.097	0.813	0.398	0.182	0
TRINITY_DN25815_c1_g3_i1	0	0	0.547	0	0	0	0.197	0	0	0.434	0	1.643	0.59	2.007	0.354	0.181	0.5	0.583	0.835	0
TRINITY_DN25817_c0_g1_i6	0	0	0	0	0.131	0	0.511	0	0.254	1.495	0.303	3.476	1.067	2.274	0.565	0.181	2.41	1.915	2.035	0.112			sp|C7YQ31|LCL3_NECH7	Probable endonuclease LCL3 OS=Nectria haematococca
TRINITY_DN25845_c0_g1_i1	0	0.159	0.213	0	0	0	0.098	0	0	0.175	0.105	1.112	0	2.437	0	0.347	0.793	0.768	0.816	0
TRINITY_DN25869_c0_g1_i2	0	0	0	0	0	0	0	0	0	0.545	0	2.123	0.041	2.055	0.144	0	1.704	0.305	0.806	0
TRINITY_DN25869_c0_g2_i1	0.041	0.644	1.742	0.475	0.208	0.123	1.082	0.053	0.074	2.474	0.376	10.097	1.233	5.743	1.551	0.82	6.563	4.311	4.07	0.186			sp|G0SBQ3|NSP1_CHATD	Nucleoporin NSP1 OS=Chaetomium thermophilum
TRINITY_DN25884_c0_g1_i2	0.058	0.556	0.825	0.407	0	0.061	0.285	0	0.066	0.545	0.502	6.591	1.015	2.112	1.264	0.736	1.087	1.156	0	0.136
TRINITY_DN25897_c0_g1_i1	0.066	4.754	6.347	1.676	0.701	0.359	2.841	0.176	0.164	12.221	1.663	42.119	5.273	17.679	4.242	0.722	23.498	17.65	20.732	0.645			sp|P38523|GRPE_YEAST	GrpE protein homolog, mitochondrial OS=Saccharomyces
TRINITY_DN25930_c0_g1_i2	0	1.12	3.326	0	0	0	2.684	0	1.262	7.034	9.098	66.9	0.684	57.213	2.116	5.862	50.2	26.243	19.715	0
TRINITY_DN25935_c0_g1_i1	0	0.565	0.927	0	0	0.83	0.256	0	0	0.822	0.607	6.501	1.792	5.399	1.867	0.514	0.607	1.813	2.15	0
TRINITY_DN25935_c0_g1_i2	0	0.265	0.389	0.223	0	0	0.138	0.062	0	0.895	0.063	2.875	0.363	1.338	0.259	0.181	1.92	1.193	0.787	0.062			sp|Q80U87|UBP8_MOUSE	Ubiquitin carboxyl-terminal hydrolase 8
TRINITY_DN25942_c0_g1_i2	0.182	3.44	7.088	2.723	0.427	0.379	2.497	0.237	0	5.88	2.395	18.811	4.952	18.816	4.501	2.778	12.587	8.492	11.48	0.211			sp|Q54DB1|CM2A2_DICDI	Charged multivesicular body protein 2a
TRINITY_DN25942_c0_g1_i4	0	0	0.167	0.087	0	0	0.079	0	0	0	0.157	0.2	0.197	0.707	0.144	0.445	0.167	0.148	0.518	0			sp|Q54DB1|CM2A2_DICDI	Charged multivesicular body protein 2a
TRINITY_DN25950_c0_g1_i1	0.033	0.935	1.075	0.475	0.11	0	0.354	0.062	0.041	1.754	0.209	5.639	0.684	2.714	0.824	0.264	4.212	2.572	2.947	0.074			sp|Q12381|PRP1_SCHPO	Pre-mRNA-splicing factor prp1 OS=Schizosaccharomyces
TRINITY_DN25954_c0_g1_i3	0.058	0.662	0	0.223	0.175	0	0.305	0.088	0.016	0.748	0.554	5.739	0.849	3.555	0.891	0.417	3.546	2.747	2.764	0.099			sp|O13396|MSH2_NEUCR	DNA mismatch repair protein msh-2 OS=Neurospora
TRINITY_DN25958_c0_g1_i2	0	5.989	8.32	2.287	0.624	0.441	3.579	0.413	0.385	10.864	2.29	41.999	5.625	28.889	4.654	3.167	25.869	18.723	18.381	0.905			sp|P87130|TIM17_SCHPO	Mitochondrial import inner membrane translocase
TRINITY_DN25972_c0_g1_i1	0	0	0.389	0	0	0	0.413	0	0.131	0.545	0.732	3.876	0	8.973	0.239	1.403	5.926	2.044	1.728	0
TRINITY_DN25981_c0_g1_i4	0	0	0.454	0.184	0	0	0.088	0	0	1.071	0	5.689	0.746	5.562	0.354	0	6.661	0.703	2.236	0			sp|O75936|BODG_HUMAN	Gamma-butyrobetaine dioxygenase OS=Homo
TRINITY_DN25994_c0_g1_i1	0.215	2.884	4.772	1.405	0.383	0.072	2.448	0.229	0.336	5.511	2.217	17.97	2.248	14.248	3.294	1.57	15.006	8.76	8.37	0.248			sp|Q9XI60|LPP2_ARATH	Lipid phosphate phosphatase 2 OS=Arabidopsis
TRINITY_DN25997_c0_g1_i1	0	0	0	0	0	0	0	0	0	0	0.418	0	0.622	3.87	0	0	1.841	0.657	0.115	0
TRINITY_DN25999_c0_g1_i6	0	4.375	3.141	1.386	0	0.246	0.836	0.308	0.287	7.403	2.29	31.632	3.771	18.205	3.103	1.695	14.595	11.026	10.078	0.285			sp|Q08C33|ISOC1_DANRE	Isochorismatase domain-containing protein
TRINITY_DN25999_c0_g1_i7	0	0.45	0.259	0.145	0	0	0.452	0	0	0.342	0.199	2.855	0.363	2.485	0.757	0.292	1.489	0	1.91	0.248			sp|Q08C33|ISOC1_DANRE	Isochorismatase domain-containing protein
TRINITY_DN259_c0_g1_i1	0	0.176	0.51	0.174	0	0.143	0	0	0	0.36	0.45	4.718	0.663	3.125	0.891	0.542	0	0.518	1.526	0.161
TRINITY_DN259_c0_g1_i2	0	0.079	0.167	0.019	0	0	0.118	0.018	0.033	0.36	0	1.472	0.073	0.765	0.249	0	1.567	0.675	0.326	0			sp|Q2HEW5|CHG2_CHAGB	PKS-NRPS hybrid synthetase CHGG_01239 OS=Chaetomium
TRINITY_DN26002_c0_g1_i3	0	0	0.973	0.068	0.099	0	0.462	0	0	2.575	0	5.098	0.673	0	1.187	0.806	7.248	3.672	1.037	0
TRINITY_DN26002_c0_g1_i4	0	1.879	1.14	0.242	0.12	0	0.649	0.211	0.156	1.634	0.335	9.756	0.031	7.903	0.881	0.458	2.233	2.359	4.972	0.161
TRINITY_DN26011_c0_g1_i1	0.108	0.626	0.704	0.572	0	0.051	0.354	0.097	0	1.689	1.035	6.941	0.87	4.769	0.757	0.611	4.741	1.758	2.755	0.124
TRINITY_DN26015_c0_g1_i2	0.083	9.394	10.692	4.254	0.427	0.092	7.01	0.94	1.27	12.831	4.591	69.434	6.744	48.135	12.507	4.223	44.489	30.341	27.538	0
TRINITY_DN26019_c0_g1_i2	0.116	0.423	0.334	0.252	0.044	0	0.413	0	0.033	0.471	0.282	3.135	0.145	2.724	0.373	0.389	1.567	1.462	1.017	0.136			sp|P25358|ELO2_YEAST	Elongation of fatty acids protein 2 OS=Saccharomyces
TRINITY_DN26030_c0_g1_i1	0	1.244	0.899	0.271	0.066	0.051	0.855	0	0.09	1.32	0.627	8.274	0.912	8.763	1.111	0.445	5.671	3.043	2.496	0.062
TRINITY_DN26033_c0_g1_i3	0.075	3.952	3.891	1.095	0.427	0.051	2.497	0.105	0.41	6.24	1.035	29.118	3.129	18.692	3.629	1.875	16.524	10.629	12.439	0.124			sp|Q9BXS5|AP1M1_HUMAN	AP-1 complex subunit mu-1 OS=Homo sapiens
TRINITY_DN26051_c0_g1_i1	0.017	0.626	0.296	0.378	0.055	0.082	0.315	0.062	0.049	0.692	0.387	4.017	0.332	3.039	0.613	0.333	2.557	1.804	1.315	0.099
TRINITY_DN26053_c0_g1_i2	0.066	1.076	1.112	0	0.153	0.031	0.423	0.105	0.041	1.385	0.241	4.798	0.321	3.966	1.178	0.57	5.289	3.238	2.409	0			sp|P36583|PCK2_SCHPO	Protein kinase C-like 2 OS=Schizosaccharomyces
TRINITY_DN26053_c0_g1_i4	0	0.229	0.232	0.029	0	0	0.138	0	0	0.36	0.146	4.828	0.083	2.007	0.335	0.125	1.273	0.944	1.315	0
TRINITY_DN26060_c0_g1_i3	0	0.132	0.371	0	0.066	0	0.472	0.009	0.008	0.12	0.146	4.848	0.746	3.306	0.555	0	2.459	1.045	1.824	0.149			sp|Q88RC0|DAVD_PSEPK	Glutarate-semialdehyde dehydrogenase DavD
TRINITY_DN26061_c0_g2_i1	0	0.626	0.306	0.126	0	0.174	0.118	0	0	0.332	1.108	4.968	0	3.488	0.441	0.445	3.546	2.414	1.104	0
TRINITY_DN26065_c0_g1_i2	0.124	3.59	1.603	0.3	0.241	0.061	0.619	0.158	0.148	3.157	1.809	14.945	1.233	15.71	1.408	1.431	9.198	4.431	5.874	0.074		Aspartic_Peptidases=EFP91621	sp|P0CS14|DDI1_CRYNJ	DNA damage-inducible protein 1 OS=Cryptococcus
TRINITY_DN26066_c0_g1_i3	0.166	1.597	8.821	1.851	0.427	0	2.252	0	0.098	7.237	2.468	32.373	4.289	15.433	4.29	4.945	21.236	10.804	12.996	0.471	AFM03407|GT4		sp|P43619|NADC_YEAST	Nicotinate-nucleotide pyrophosphorylase
TRINITY_DN26067_c0_g1_i1	0	2.426	3.762	1.231	0	0	2.065	0.22	0	3.923	1.088	25.242	2.269	13.579	4.242	2.125	14.781	7.493	7.928	1.017			sp|Q9WTP7|KAD3_MOUSE	GTP:AMP phosphotransferase AK3, mitochondrial
TRINITY_DN26070_c0_g1_i1	0	0	1.408	0.203	0.033	0.051	0.57	0.123	0	1.791	0.565	5.719	1.233	2.972	0.632	0.375	3.614	2.294	1.661	0.335
TRINITY_DN26070_c0_g1_i3	0	0	0	0	0	0	0.059	0	0	0.166	0.094	0.611	0	1.07	0.354	0	0.754	0.768	0.576	0
TRINITY_DN26071_c0_g1_i4	0	0	0	0	0	0	0.088	0.053	0	0	0.303	2.664	0	2.676	0	0	1.881	0	0.403	0
TRINITY_DN26072_c0_g1_i1	0.19	3.669	3.771	0.504	0.175	0.072	1.632	0.167	0.115	6.332	1.705	22.076	3.75	13.828	2.95	2.264	12.107	7.132	6.988	0.298
TRINITY_DN26073_c0_g1_i1	0	0	0	0	0	0	0	0	0.074	0.074	0	3.876	0	8.362	0.192	0	3.605	1.859	0.576	0			sp|Q01200|PRIA_LENED	Protein priA OS=Lentinula edodes GN=priA
TRINITY_DN26074_c0_g1_i4	0	2.082	3.947	0.581	0.361	0	1.141	0.097	0.115	3.729	0.638	17.869	2.186	12.672	2.528	2.626	13.752	6.817	8.562	0.223			sp|Q99LB6|MAT2B_MOUSE	Methionine adenosyltransferase 2 subunit
TRINITY_DN26076_c0_g1_i1	0	0.547	0.445	0.155	0	0.02	0.354	0.009	0.025	1.006	0.125	3.866	0.404	1.739	0.479	0.292	2.459	1.304	1.526	0.074
TRINITY_DN26080_c0_g1_i1	0.174	0.353	0	0.436	0	0.082	0.462	0.018	0.287	0.526	1.318	5.199	0.404	8.973	0.153	0.181	0.353	2.128	2.265	0.099
TRINITY_DN26080_c0_g1_i2	0.066	0.291	1.835	0.484	0.12	0	0.678	0.132	0	1.357	0.167	6.431	0.694	1.596	0.833	0.458	6.406	2.535	2.966	0.087			sp|Q5AHG6|SCH9_CANAL	Serine/threonine-protein kinase SCH9 OS=Candida
TRINITY_DN26082_c0_g1_i3	0	0.247	0.612	0	0.088	0	0.334	0	0.139	0.692	0.324	7.012	0.145	4.061	0.086	0.611	4.055	0.953	2.563	0
TRINITY_DN26087_c0_g1_i1	0	0.088	0.334	0.407	0	0	0.206	0	0	0.092	0.23	0.911	0.756	1.596	0.45	1.209	0.833	0.786	0.49	0			sp|P0CM54|CANB_CRYNJ	Calcineurin subunit B OS=Cryptococcus neoformans
TRINITY_DN26087_c0_g1_i2	1.88	29.25	31.271	9.166	1.993	2.633	16.174	2.628	1.696	37.956	13.563	146.19	25.132	152.183	19.641	13.614	82.279	48.842	52.1	1.24			sp|P0CM54|CANB_CRYNJ	Calcineurin subunit B OS=Cryptococcus neoformans
TRINITY_DN26090_c0_g1_i2	0	0	0.612	0	0	0	0.275	0	0.148	1.348	0	5.79	0.269	0.487	0.938	0	2.958	2.831	3.254	0			sp|A4QN59|DPH2_DANRE	2-(3-amino-3-carboxypropyl)histidine synthase
TRINITY_DN26100_c0_g1_i3	0	0	0.037	0	0.011	0	0.029	0	0	0	0	0.571	0	0.229	0	0.111	1.391	0.278	0.154	0			sp|Q27474|DNLI1_CAEEL	DNA ligase 1 OS=Caenorhabditis elegans
TRINITY_DN26101_c0_g1_i1	0.091	0.856	0.843	0.252	0.088	0.164	0.492	0.088	0.057	1.292	0.241	3.225	0	3.373	0.776	0.5	3.458	2.146	2.755	0.025			sp|Q17R09|PRP16_BOVIN	Pre-mRNA-splicing factor ATP-dependent
TRINITY_DN26107_c0_g1_i1	0	0.291	0.51	0.097	0.022	0.031	0	0.018	0	0.452	0.429	5.189	0.124	4.415	0.421	0.208	2.684	1.221	2.217	0.087
TRINITY_DN26117_c0_g1_i1	0	0.891	0.25	0.107	0.186	0.092	0.216	0	0.139	0.563	0.805	3.155	0.601	1.921	0.163	0	2.086	1.258	0.777	0
TRINITY_DN26121_c0_g1_i1	0.224	2.364	1.89	0.746	0.197	0	0.954	0.141	0.221	2.52	1.684	8.484	1.626	5.676	2.241	0.972	5.407	3.099	4.156	0.347			sp|O31463|HMT_BACSU	Homocysteine S-methyltransferase YbgG OS=Bacillus
TRINITY_DN26124_c0_g1_i2	0.149	1.782	2.557	0.552	0.263	0.154	1.573	0.176	0.098	4.08	1.025	17.188	1.968	10.818	2.231	0.834	12.028	8.002	8.187	0.198			sp|O13864|IMB1_SCHPO	Importin subunit beta-1 OS=Schizosaccharomyces
TRINITY_DN26129_c0_g1_i2	0	0.582	1.167	0.484	0.372	0	1.032	0	0.066	2.372	0.638	5.339	1.129	2.532	0.795	0.431	1.489	1.369	2.256	0.26
TRINITY_DN26130_c0_g1_i1	0.075	2.435	2.39	1.008	0.372	0	1.032	0.053	0.238	3.406	1.129	10.778	2.631	15.175	3.131	1.973	6.915	5.18	5.241	0.633
TRINITY_DN26131_c0_g1_i2	0.05	4.225	4.596	1.279	0.285	0.102	2.084	0.246	0	6.286	0.952	17.429	3.916	11.458	3.744	1.556	13.733	9.389	8.139	0.335			sp|O74478|PGM3_SCHPO	Probable phosphoribomutase OS=Schizosaccharomyces
TRINITY_DN26131_c0_g1_i3	0	0	0	0	0	0	0	0	0	0.295	0.481	0.501	0.124	0.726	0	0	0.225	0.472	0	0			sp|O74478|PGM3_SCHPO	Probable phosphoribomutase OS=Schizosaccharomyces
TRINITY_DN26131_c0_g1_i4	0	0	0	0	0	0	0	0	0	0.277	0	0.711	0	2.771	0.431	0	0.617	0	0.931	0			sp|O74478|PGM3_SCHPO	Probable phosphoribomutase OS=Schizosaccharomyces
TRINITY_DN26134_c0_g1_i1	0.257	0.106	0.695	0.058	1.391	1.619	0.364	0.114	0.107	3.471	2.154	1.743	2.901	0.793	0.833	0.57	0.509	5.865	2.716	0.099					TraesCS2B02G336700.1	cds chromosome:IWGSC:2B:480926026:480933881:1
TRINITY_DN26140_c0_g1_i1	0.116	2.32	3.289	1.25	0.307	0.123	1.367	0.07	0.066	4.015	1.098	15.766	2.372	8.668	2.538	1.556	8.003	5.948	7.66	0.335			sp|Q6BDR8|NSE4_SCHPO	Non-structural maintenance of chromosome
TRINITY_DN26148_c0_g1_i2	0	2.02	2.928	0.436	0	0	0.728	0	0.205	3.194	1.631	11.198	1.43	7.788	1.81	1.681	7.072	3.182	4.118	0.31
TRINITY_DN26205_c0_g1_i1	0.025	0.741	0.806	0.359	0.088	0.031	0.305	0.053	0.049	0.914	0.366	3.436	0.363	4.453	0.565	0.57	2.89	1.351	0.979	0.062
TRINITY_DN26208_c0_g1_i1	0	0	0	0	0	0	0.295	0	0	0	0.491	3.946	0.031	0	0	0.264	4.427	1.563	0.835	0			sp|O74885|YQE1_SCHPO	Putative dioxygenase C576.01c OS=Schizosaccharomyces
TRINITY_DN26232_c0_g1_i4	0	0	0.222	0.068	0	0	0.324	0	0	0.462	0	2.434	0.166	2.236	0.46	0.264	2.909	0.407	0.691	0			sp|P26045|PTN3_HUMAN	Tyrosine-protein phosphatase non-receptor
TRINITY_DN26234_c0_g1_i2	0	0.759	1.418	0	0	0	0.944	0.062	0	1.329	1.098	7.232	0.166	6.67	0.594	1	7.092	3.09	3.532	0.074			sp|A8N5E5|SEY1_COPC7	Protein SEY1 OS=Coprinopsis cinerea (strain
TRINITY_DN26243_c0_g1_i1	0	0.37	0.176	0.116	0.088	0	0.118	0.053	0.049	0.443	0	3.396	0.383	2.055	0.22	0.111	1.362	0.879	0.873	0.05
TRINITY_DN26247_c1_g1_i2	0	0.071	0	0	0	0	0.128	0	0.033	0.046	0	0.881	0.031	0.602	0.115	0.139	0.441	0.463	0.47	0
TRINITY_DN26260_c0_g1_i1	0	0	0	0.785	0	0.082	0	0	0.098	2.169	1.014	7.322	2.476	7.11	0.699	0	2.723	2.664	1.113	0.372
TRINITY_DN26264_c0_g1_i3	0	0.344	0.25	0.048	0	0.051	0.275	0	0.09	0.831	0.533	5.078	0.715	4.109	0.335	0.125	1.117	0.934	0.931	0			sp|Q8T045|RUMI_DROME	O-glucosyltransferase rumi OS=Drosophila
TRINITY_DN26274_c0_g1_i1	0.066	8.556	7.885	2.083	1.325	0.133	3.323	0.492	0.344	12.314	1.997	45.024	8.536	21.807	5.478	1.667	17.161	15.901	20.32	0.955			sp|Q9HDV9|GCSH_SCHPO	Putative glycine cleavage system H protein,
TRINITY_DN26280_c0_g1_i3	0	8.327	10.618	2.926	1.03	0	5.545	0.598	0.729	12.923	4.758	56.904	8.422	41.77	7.671	6.307	29.63	19.805	21.481	0
TRINITY_DN26283_c0_g1_i4	0	1.597	4.494	0.3	0	0.348	0.747	0	0.148	2.945	1.088	21.626	1.212	14.478	1.676	1.32	16.368	7.271	10.213	0.099
TRINITY_DN26291_c0_g1_i1	0	23.022	40.62	7.771	2.475	1.26	15.367	1.266	1.156	36.147	13.594	153.703	44.442	106.409	24.985	13.683	65.96	47.547	61.775	3.423
TRINITY_DN26302_c0_g1_i1	0.116	1.235	1.946	0.678	0.077	0.061	1.75	0.141	0.033	3.018	0.366	10.778	1.937	8.008	1.867	0.806	8.336	5.162	3.772	0.322			sp|Q7Z9Z2|TBG_COPC7	Tubulin gamma chain OS=Coprinopsis cinerea
TRINITY_DN26310_c0_g1_i2	0.025	0.538	3.845	0.717	0.241	0.174	1.288	0.07	0.033	4.717	0.335	15.245	3.004	4.186	2.136	1.334	9.638	6.91	7.132	0.459
TRINITY_DN26314_c0_g1_i1	0.058	0.468	0.5	0.252	0.274	0	0.206	0	0	1.606	0	7.713	0	3.545	0.421	0	5.544	3.793	2.889	0			sp|P08456|PSS_YEAST	CDP-diacylglycerol--serine O-phosphatidyltransferase
TRINITY_DN26337_c0_g1_i1	0.075	5.204	8.144	1.231	1.249	0.594	4.523	0.686	0.639	13.551	3.44	47.027	8.142	23.355	6.024	2.32	34.655	23.81	24.898	0.657			sp|Q4PCS5|KAD2_USTMA	Adenylate kinase OS=Ustilago maydis (strain
TRINITY_DN26346_c0_g1_i1	0	0	0	0	0	0	0	0	0	0.092	0	0.16	0	1.223	0	0	0.323	0.592	0.182	0			sp|Q0CT11|CREB_ASPTN	Probable ubiquitin carboxyl-terminal hydrolase
TRINITY_DN26346_c0_g1_i2	0	0	0	0	0	0	0	0	0	0.24	0	1.733	0	0	0	0.389	0.333	0	0.624	0			sp|Q0CT11|CREB_ASPTN	Probable ubiquitin carboxyl-terminal hydrolase
TRINITY_DN26346_c0_g1_i4	0.025	0.432	0.695	0.31	0.044	0.072	0.374	0.018	0.066	0.498	0.22	3.095	0.435	1.739	0.584	0	2.547	1.212	1.267	0.05			sp|Q0CT11|CREB_ASPTN	Probable ubiquitin carboxyl-terminal hydrolase
TRINITY_DN26359_c0_g1_i1	0	2.532	2.891	0.649	0.088	0.133	1.455	0.167	0.205	3.166	1.37	19.222	1.699	14.334	2.116	1.834	12.312	5.911	6.7	0.149	CCA70832.1|GH20		sp|Q9SYK0|HEXO2_ARATH	Beta-hexosaminidase 2 OS=Arabidopsis thaliana
TRINITY_DN26363_c0_g1_i3	0	0.026	0	0	0.077	0.082	0.305	0	0	0.96	0	2.484	0.601	0.898	0.488	0.306	1.254	0.722	0.806	0.05			sp|Q04800|FRP1_SCHPO	Ferric reductase transmembrane component
TRINITY_DN26371_c0_g1_i1	0	0	0.528	0	0.11	0	0	0	0	0.858	0	2.023	0	0.946	0.594	0	3.859	2.784	1.891	0
TRINITY_DN26382_c0_g1_i4	0.199	12.42	15.927	4.137	0.789	0.789	8.977	1.143	0.877	18.203	7.508	92.432	11.292	83.741	11.195	5.362	51.61	35.632	43.788	0.682			sp|Q4P0I7|SAR1_USTMA	Small COPII coat GTPase SAR1 OS=Ustilago
TRINITY_DN26382_c0_g1_i5	0	0	0	0	0	0	0	0	0	0.314	0	3.606	0.114	1.892	0	0	0.206	0.786	0.298	0			sp|Q4P0I7|SAR1_USTMA	Small COPII coat GTPase SAR1 OS=Ustilago
TRINITY_DN26387_c0_g1_i1	0	5.91	15.483	0.184	0	0	7.885	0	0.369	29.27	4.131	255.29	3.46	52.789	11.348	5.348	187.008	84.242	74.301	0
TRINITY_DN26387_c0_g1_i3	0.323	33.554	25.313	1.415	0.285	0.113	8.593	0.07	2.434	14.631	34.132	292.691	13.084	337.183	12.507	34.479	0	41.451	60.844	0.124
TRINITY_DN26390_c0_g1_i3	0	0.379	1.779	0.126	0.12	0	0.619	0.053	0.049	2.298	0.209	5.96	0.622	1.625	1.034	0	11.157	4.422	2.784	0.099			sp|Q9Y7Y8|SYQ_SCHPO	Probable glutamine--tRNA ligase OS=Schizosaccharomyces
TRINITY_DN26395_c0_g1_i2	0	0.626	0.324	0.581	0	0.318	0.403	0	0.18	0.655	0.408	9.726	0.404	10.407	1.245	0.139	4.026	2.766	3.935	0
TRINITY_DN26402_c0_g1_i2	0.224	4.56	5.374	1.357	0.405	0.082	1.907	0.334	0.533	5.511	1.621	20.854	4.237	15.739	2.883	3.612	11.068	6.531	9.061	0.434			sp|Q4P7X6|IWS1_USTMA	Transcription factor IWS1 OS=Ustilago maydis
TRINITY_DN26402_c0_g1_i4	0	0	0	0.194	0	0	0.275	0	0	0.166	0	2.354	0.456	1.242	0.584	0.333	0.911	1.092	0.288	0			sp|Q4P7X6|IWS1_USTMA	Transcription factor IWS1 OS=Ustilago maydis
TRINITY_DN26413_c0_g1_i1	0.058	1.896	1.621	0.388	0	0	0.816	0.035	0.525	1.283	2.301	17.689	1.347	18.558	1.379	1.736	7.562	6.355	4.674	0.186			sp|Q10327|YD72_SCHPO	Uncharacterized protein C32A11.02c OS=Schizosaccharomyces
TRINITY_DN26413_c0_g1_i2	0	0.123	0.185	0.078	0.077	0	0.344	0.07	0.033	1.025	0.136	6.621	0.073	2.838	0.661	0.5	11.059	1.702	1.996	0			sp|Q10327|YD72_SCHPO	Uncharacterized protein C32A11.02c OS=Schizosaccharomyces
TRINITY_DN26416_c0_g1_i2	0	0.415	0.315	0.165	0.033	0.051	0.374	0	0	0.6	0.324	3.796	0.238	1.835	0.402	0.181	2.674	1.36	1.046	0			sp|D3Z902|FBXW7_RAT	F-box/WD repeat-containing protein 7 OS=Rattus
TRINITY_DN26420_c0_g1_i1	0	0.044	0.445	0.262	0	0.051	0.295	0.018	0.016	1.071	0.22	3.666	0.818	1.405	0.45	0.111	1.626	0.657	0.883	0.087
TRINITY_DN26422_c0_g1_i1	0	0	0	0	0	0	0.079	0	0	0.406	0.094	1.763	0.238	0.258	0.134	0	0	0.268	0.278	0
TRINITY_DN26430_c0_g1_i2	0.19	1.067	1.492	0.727	0.044	0	1.75	0.246	0.131	2.418	0.178	13.793	1.585	2.456	1.551	0	10.451	5.92	4.578	0			sp|O13752|YF22_SCHPO	Uncharacterized TLC domain-containing protein
TRINITY_DN26433_c0_g1_i1	0.182	1.085	2.001	1.008	0.088	0.246	1.259	0.229	0.32	2.889	1.621	16.657	1.14	11.63	2.078	1.014	12.42	5.402	5.778	0.211
TRINITY_DN26434_c0_g1_i1	0.108	2.082	3.261	0.591	0.394	0.195	1.406	0.211	0.098	4.985	1.171	18.53	2.611	15.051	2.777	1.097	15.202	10.296	9.906	0.223			sp|P87048|RPN1_SCHPO	26S proteasome regulatory subunit rpn1 OS=Schizosaccharomyces
TRINITY_DN26439_c0_g1_i4	0.091	3.299	3.493	1.415	0.197	0.102	1.337	0.062	0.09	3.166	0.941	16.978	4.154	15.194	2.969	1.806	10.638	7.224	8.869	0			sp|Q6PGB6|NAA50_MOUSE	N-alpha-acetyltransferase 50 OS=Mus musculus
TRINITY_DN26442_c0_g1_i2	0.282	2.099	7.625	1.657	0.931	0.379	2.006	0.36	0.443	7.163	0.439	25.983	3.843	8.266	3.179	1.514	19.708	12.164	12.334	0.645			sp|Q6AXT8|SF3A2_RAT	Splicing factor 3A subunit 2 OS=Rattus norvegicus
TRINITY_DN26460_c0_g1_i3	0	2.24	0	0.3	0	0	0.059	0.062	0	0.738	1.244	6.27	0.963	10.932	1.053	0	0	0.648	0	0.819			sp|P15454|KGUA_YEAST	Guanylate kinase OS=Saccharomyces cerevisiae
TRINITY_DN26466_c0_g1_i2	0	13.134	26.722	4.448	1.511	0.656	6.489	0.334	0.434	30.609	4.695	92.732	18.833	40.48	12.248	6.418	58.673	45.909	54.864	1.997			sp|P25491|MAS5_YEAST	Mitochondrial protein import protein MAS5
TRINITY_DN26482_c0_g1_i1	0	0.547	1.362	0.32	0	0.041	0.442	0.088	0.082	1.394	0.669	9.275	0.456	6.766	0.709	0.722	6.847	3.589	3.187	0.161
TRINITY_DN26482_c1_g1_i2	0	4.613	3.678	1.851	0.088	0.635	1.937	0.395	0.328	4.846	3.681	34.296	4.372	30.618	4.06	2.139	13.4	9.491	9.694	0.707
TRINITY_DN26485_c0_g1_i2	0	0	0.704	0.184	0	0	0.806	0	0	1.274	1.014	9.305	0.663	3.593	0.728	0.653	5.75	3.349	3.743	0
TRINITY_DN26498_c0_g1_i2	0.083	3.696	5.272	1.037	0.504	0.164	1.475	0	0.213	5.88	1.077	20.985	3.564	13.255	3.064	2.028	11.911	9.63	9.627	0.273			sp|P04801|SYTC_YEAST	Threonine--tRNA ligase, cytoplasmic OS=Saccharomyces
TRINITY_DN26502_c0_g1_i2	0	2.858	2.761	0.562	0.055	0.184	1.023	0.167	0.156	2.169	0.471	15.415	1.481	11.812	2.538	1.097	10.334	5.162	6.21	0.409		Serine_Peptidases	sp|Q48MQ7|RUTD_PSE14	Putative aminoacrylate hydrolase RutD OS=Pseudomonas
TRINITY_DN26513_c0_g1_i1	0	0	0	0	0	0	0	0	0	0	0.324	0	0	3.622	0.469	0	1.763	1.647	1.824	0			sp|P32944|SWE1_YEAST	Mitosis inhibitor protein kinase SWE1 OS=Saccharomyces
TRINITY_DN26514_c0_g1_i1	0	9.456	17.79	4.544	1.205	0	7.679	0.51	0.541	16.191	3.137	74.002	13.654	45.144	9.72	5.14	36.683	24.689	29.976	1.277
TRINITY_DN26515_c0_g1_i2	0.083	1.367	0.584	0.242	0.175	0.041	0.6	0.018	0.049	0.905	0.356	4.968	0.704	3.287	0.948	0.764	4.457	2.266	2.064	0.025			sp|Q7Z8J6|MYO1_USTMA	Myosin-1 OS=Ustilago maydis (strain 521
TRINITY_DN26518_c0_g1_i1	0.116	2.435	6.208	2.17	0.449	0	3.195	0.22	0.533	8.778	1.443	51.835	4.869	23.499	5.143	1.5	33.392	16.9	17.095	0.521			sp|P80547|SCP2_YARLI	Fatty acid-binding protein OS=Yarrowia lipolytica
TRINITY_DN26525_c0_g1_i1	0.108	7.912	7.162	1.502	0.427	0.656	4.08	0.343	0.246	7.901	2.217	34.146	5.853	31.947	5.047	2.195	17.71	12.627	13.476	0.248			sp|O94389|CC124_SCHPO	Coiled-coil domain-containing protein 124
TRINITY_DN26528_c0_g1_i1	0.041	0.547	0.593	0.262	0.033	0	0.403	0.053	0.049	0.572	0.136	5.389	0.394	1.892	0.345	0.111	3.174	1.462	1.325	0.099
TRINITY_DN26529_c0_g1_i1	0	0.044	0.028	0	0	0.041	0.049	0	0	0.222	0	1.022	0	0.612	0.019	0	0.646	0.25	0.278	0
TRINITY_DN26543_c0_g1_i2	0.033	0.732	0.871	0.465	0.044	0.123	0.59	0	0.139	1.283	0.46	8.895	1.046	5.046	0.68	0.708	3.957	1.869	3.052	0.099
TRINITY_DN26602_c0_g1_i3	0	0	0	0	0	0	0.236	0	0	0	0.146	0.871	0	3.192	0.536	0.681	1.068	0.194	0.777	0
TRINITY_DN26611_c0_g1_i2	0	5.01	11.795	4.089	0.361	0.553	4.346	0.246	0.541	14.732	2.687	54.7	7.915	23.805	9.462	2.112	28.768	21.979	22.393	1.439
TRINITY_DN26651_c0_g1_i1	0.108	1.976	1.909	0.775	0.219	0	1.612	0.141	0.582	1.874	2.353	20.944	1.088	19.762	2.155	1.973	14.84	5.883	5.673	0.124
TRINITY_DN26653_c0_g2_i1	0.033	0.212	0.704	0.417	0.186	0.072	0.511	0.07	0.164	1.2	0.335	3.957	0.363	1.959	1.149	0.32	2.684	2.498	1.689	0.124
TRINITY_DN26655_c0_g1_i2	0	0	0	0	0	0	0	0	0	0	0	2.033	0	0.879	0.479	0	0.617	0.537	0	0
TRINITY_DN26657_c0_g1_i1	0	0	0	0	0	0.318	0	0	0.09	0.462	0	3.235	0.756	2.943	0.239	2.959	0.108	0	1.171	0			sp|Q9FM04|GDL88_ARATH	GDSL esterase/lipase At5g62930 OS=Arabidopsis
TRINITY_DN26661_c0_g1_i2	0	0.115	0.148	0.349	0.033	0.051	0.138	0.018	0.082	0.055	0.199	2.965	0.124	3.087	0.297	0.681	3.595	0.703	1.065	0			sp|P08965|MEI2_SCHPO	Meiosis protein mei2 OS=Schizosaccharomyces
TRINITY_DN26667_c0_g1_i1	0.19	2.329	3.03	0.339	0.186	0.092	1.937	0.308	0	4.523	0.941	14.714	1.813	17.144	1.676	0.986	9.952	6.503	5.884	0.322			sp|P36863|YPTV4_VOLCA	GTP-binding protein yptV4 OS=Volvox carteri
TRINITY_DN26667_c0_g1_i4	0	0	0	0	0	0	0.187	0	0.205	0.12	0.282	1.873	0.124	1.309	0.115	0.445	0	0.564	0.355	0			sp|P36863|YPTV4_VOLCA	GTP-binding protein yptV4 OS=Volvox carteri
TRINITY_DN26670_c0_g1_i1	0	0.441	1.047	0.62	0.537	0	0	0	0	0	0.92	2.444	0	7.148	1.245	3.751	1.459	3.506	6.978	0
TRINITY_DN26670_c0_g2_i2	0.745	0.979	2.159	2.723	0.876	0.963	1.042	0.123	0.115	0.452	3.263	21.956	0.901	21.358	2.317	4.834	22.137	3.922	4.598	0.211
TRINITY_DN26671_c0_g1_i5	0	0.415	0	0.029	0.099	0	0.265	0.026	0.041	0	0.178	3.666	0.559	0.956	0.833	0.292	2.008	1.286	0	0
TRINITY_DN26678_c0_g1_i1	0	3.087	3.632	0.494	0.263	0.041	0.964	0.141	0.107	3.508	0.983	13.242	1.854	11.601	2.088	0.82	7.444	4.505	6.431	0.409			sp|Q10358|RER1_SCHPO	Protein rer1 OS=Schizosaccharomyces pombe
TRINITY_DN26683_c0_g1_i2	0	2.567	2.492	0.717	0.142	0.297	1.868	0.202	0.123	4.929	1.359	14.764	2.093	8.524	3.984	2.209	10.598	5.171	7.602	0
TRINITY_DN26685_c0_g1_i1	0	0.45	0.389	1.444	0	0.256	0.708	0	0.443	0.166	1.401	5.359	0	14.43	1.082	0.625	5.603	2.044	2.169	0
TRINITY_DN26690_c0_g1_i1	0.025	1.067	2.252	0.446	0.088	0.051	1.2	0.132	0.238	2.345	0.491	11.619	1.367	6.422	1.657	0.681	10.951	5.069	4.271	0.124			sp|Q6C3E5|LKHA4_YARLI	Leukotriene A-4 hydrolase homolog OS=Yarrowia
TRINITY_DN26698_c0_g1_i1	0.033	2.196	0.778	0.165	0.044	0	0.374	0.018	0.139	0.858	0.565	7.182	0.352	8.543	0.575	1.056	3.281	2.71	2.851	0.074
TRINITY_DN26707_c0_g1_i1	0.414	32.831	87.262	13.905	4.261	1.476	17.55	1.626	1.246	103.614	10.896	270.815	53.009	126.257	34.494	17.67	169.916	144.85	206.461	5.618			sp|P41887|HSP90_SCHPO	Heat shock protein 90 homolog OS=Schizosaccharomyces
TRINITY_DN26707_c0_g2_i2	0	0.935	1.473	0.523	0.044	0.123	0.885	0.114	0.139	1.689	0.826	8.754	1.347	7.999	1.571	0.667	6.759	3.034	4.051	0.062			sp|Q63187|ELOA1_RAT	Elongin-A OS=Rattus norvegicus GN=Eloa PE=1
TRINITY_DN26714_c0_g1_i2	0	0.67	0	0.262	0	0	0.678	0.097	0	0.978	0.418	2.975	0.901	5.132	1.216	0.861	2.223	1.397	1.613	0.26			sp|P46859|GNTK_ECOLI	Thermoresistant gluconokinase OS=Escherichia
TRINITY_DN26721_c0_g1_i1	0	0.088	0.056	0.155	0	0	0.098	0	0	0.268	0.282	1.673	0	1.94	0.048	0.097	1.44	0.352	0.182	0
TRINITY_DN26721_c0_g2_i1	0.133	1.817	1.362	0.242	0.23	0.072	0.619	0.22	0.164	1.717	1.255	8.083	1.088	7.291	1.255	1.056	3.869	2.655	3.071	0.161
TRINITY_DN26725_c0_g1_i1	0	2.814	15.872	2.481	0.832	0	4.287	0.229	0.426	11.557	2.259	50.092	2.321	12.452	8.504	0.931	85.698	42.459	41.532	0		Serine_Peptidases	sp|C5K1Y9|CBPYA_BLAGS	Carboxypeptidase Y homolog A OS=Blastomyces
TRINITY_DN26732_c0_g1_i3	0.099	0.856	3.03	4.603	0.559	1.178	1.829	0.07	0.188	0.508	3.242	22.507	1.44	18.568	3.84	6.904	16.142	4.357	5.567	1.104
TRINITY_DN26732_c0_g1_i4	0.215	1.094	9.312	8.304	1.019	2.008	4.896	0.141	0.713	0.969	6.065	29.609	2.631	34.393	4.865	11.975	36.056	7.252	7.439	2.232
TRINITY_DN26740_c0_g1_i1	0	0.961	1.297	0.465	0.022	0.031	0.275	0.044	0.057	1.265	0.471	6.391	1.046	5.552	0.575	0.695	4.77	1.887	2.227	0.074
TRINITY_DN26753_c0_g1_i1	0	1.649	0.612	0.562	0	0.092	0.816	0.053	0.156	0.923	1.318	9.966	0.849	12.347	0.766	0.695	5.76	3.376	2.553	0
TRINITY_DN26756_c0_g1_i2	0	2.373	2.196	0.407	0.416	0.277	0.964	0.062	0	3.378	0.261	9.806	3.926	10.111	2.183	0.695	5.015	3.608	6.546	0			sp|O60181|RIB3_SCHPO	3,4-dihydroxy-2-butanone 4-phosphate synthase
TRINITY_DN26758_c0_g1_i1	0	0	0	0	0	0	0	0	0	0.046	0	0.601	0	0.784	0	0	0.147	0.157	0.182	0			sp|Q09922|YAKB_SCHPO	Uncharacterized transcriptional regulatory
TRINITY_DN26758_c0_g1_i4	0	0	0	0	0	0	0	0	0	1.348	0	3.706	0.58	4.549	0	0	2.547	0.352	1.123	0			sp|Q09922|YAKB_SCHPO	Uncharacterized transcriptional regulatory
TRINITY_DN26758_c0_g1_i5	0	1.605	1.723	0.494	0.066	0	0.993	0.097	0	1.108	0.837	10.788	0.311	4.052	1.494	0.931	7.493	4.116	3.782	0.248			sp|Q09922|YAKB_SCHPO	Uncharacterized transcriptional regulatory
TRINITY_DN26763_c0_g1_i2	0	0	0	0	0	0	0.354	0	0	0.655	0	3.977	0.124	0.564	0.594	0	6.612	2.433	1.056	0			sp|Q6P4Y9|VATC1_XENTR	V-type proton ATPase subunit C 1 OS=Xenopus
TRINITY_DN26764_c0_g1_i1	0	0.115	0.065	0.019	0	0.01	0.354	0	0	0.877	0.031	1.903	0.052	1.405	0.441	0.056	2.155	1.425	1.363	0			sp|O43001|SYJ1_SCHPO	Inositol-1,4,5-trisphosphate 5-phosphatase
TRINITY_DN26771_c0_g1_i2	0.033	0.785	0.713	0.349	0.142	0	0.413	0	0.057	1.246	0.46	4.908	0.984	4.855	0.871	0.32	3.418	1.545	1.91	0.037
TRINITY_DN26772_c0_g1_i3	0.513	0	1.427	0.455	0	0.492	3.766	0.132	1.68	0	10.102	122.912	0	133.529	2.174	12.475	138.934	20.924	31.761	0.136			sp|Q6FWV2|ATP10_CANGA	Mitochondrial ATPase complex subunit ATP10
TRINITY_DN26773_c0_g1_i2	0	0	0	0	0	0	0	0	0	0.508	0	5.158	0	0	0.479	0	2.488	0	0.49	0
TRINITY_DN26773_c0_g2_i1	0	0.944	1.288	0.155	0.12	0	0.344	0.088	0	1.837	0.251	5.329	0	3.66	0.9	0.458	4.202	2.359	3.081	0.409
TRINITY_DN26776_c0_g2_i1	0.05	0.097	0.083	0	0	0	0.354	0	0.27	0.092	0.45	10.407	0.114	9.432	0.306	1.195	10.647	1.674	1.977	0			sp|P32449|AROG_YEAST	Phospho-2-dehydro-3-deoxyheptonate aldolase,
TRINITY_DN26777_c0_g1_i1	0	0.362	0.408	0.126	0	0	0.206	0.018	0.09	0.692	0.146	4.457	0.114	3.154	0.45	0	2.38	0.999	1.19	0.074	CDU24095.1|GT2		sp|Q99126|CHS3_USTMA	Chitin synthase 3 OS=Ustilago maydis (strain
TRINITY_DN26785_c0_g1_i1	0.422	9.721	42.482	11.686	1.019	0.789	10.717	0.22	1.164	28.273	8.23	135.753	18.253	52.416	19.469	12.725	92.28	46.64	61.852	2.939
TRINITY_DN26787_c0_g1_i2	2.369	25.589	29.121	6.114	2.618	2.008	11.1	0.861	1.574	17.972	5.72	106.345	12.514	103.876	20.197	16.67	70.603	33.005	36.109	4.378
TRINITY_DN26791_c0_g1_i3	0.215	0.079	1.89	0.194	0.263	0	0.718	0.044	0	4.329	0	6.801	0.559	0.478	1.772	0.861	11.499	6.299	5.346	0			sp|P40489|XBP1_YEAST	Transcriptional repressor XBP1 OS=Saccharomyces
TRINITY_DN26792_c0_g1_i1	0	0	0	0	0	0	0	0	0	0	0	0.551	0	0.229	0	0	0.147	0.083	0.086	0			sp|O60055|UTP20_SCHPO	U3 small nucleolar RNA-associated protein
TRINITY_DN26792_c0_g1_i2	0.025	0.468	0.639	0.32	0.088	0.031	0.305	0.044	0.016	1.449	0.105	3.756	0.373	1.3	0.479	0.125	2.527	1.776	1.584	0.112			sp|O60055|UTP20_SCHPO	U3 small nucleolar RNA-associated protein
TRINITY_DN26794_c0_g1_i1	0	0	0	0	0	0	0	0	0	0.12	0	1.633	0	0.975	0	0	0.47	0.527	0.643	0
TRINITY_DN26794_c0_g1_i2	0	0.273	1.001	0.213	0.055	0	0.482	0.018	0.139	0.628	0.429	1.873	0.818	1.214	0.68	0.5	2.664	1.156	1.133	0.025
TRINITY_DN26799_c0_g2_i2	0.066	0.132	0.528	0.136	0.011	0.02	0.315	0.018	0.066	0.738	0.22	2.154	0.725	1.873	0.632	0.403	1.646	1.008	0.586	0.087
TRINITY_DN26801_c0_g1_i1	0	1.694	1.066	0.194	0.088	0.01	0.501	0.097	0.049	1.643	0.471	6.17	0.694	4.893	0.977	0.778	4.134	2.165	1.833	0.05
TRINITY_DN26806_c0_g1_i1	0.058	4.552	3.011	0.359	0.219	0.061	1.485	0	0.172	3.138	1.861	15.295	2.59	18.1	2.183	2.375	9.119	5.374	6.181	0.062			sp|Q8SQW6|ECT1_ENCCU	Probable ethanolamine-phosphate cytidylyltransferase
TRINITY_DN26811_c0_g1_i8	0	0	0	0	0	0	0	0	0	0.646	0	0	0	2.007	0.201	0	1.234	0.379	0.048	0
TRINITY_DN26815_c0_g1_i2	0.041	0	0	0.126	0	0	0.059	0	0.025	0	0.188	1.512	0	0.602	0.038	0.32	1.038	0.25	0.307	0			sp|Q85T01|NU5M_CRYNH	NADH-ubiquinone oxidoreductase chain 5 OS=Cryptococcus
TRINITY_DN26820_c0_g1_i1	0.265	0.688	1.242	0.281	0.175	0	2.507	0.176	0.361	1.56	3.921	36.33	0.352	65.871	1.752	5.334	38.583	11.951	7.458	0
TRINITY_DN26820_c0_g1_i3	0	0	0	0	0	0	0	0	0	0.194	0.376	0.521	0	1.089	0	0	0.333	0.093	0.307	0
TRINITY_DN26821_c1_g1_i2	0	0.115	0.204	0.136	0.088	0.082	0.354	0.079	0.025	0.951	0.188	4.608	0.052	3.01	0.287	0.208	4.045	1.314	1.459	0.236			sp|P08770|TRA1_MAIZE	Putative AC transposase OS=Zea mays PE=2
TRINITY_DN26825_c0_g1_i1	0	3.008	3.141	0.765	0.142	0.666	1.15	0.141	0.131	3.461	0.586	15.215	4.455	4.74	2.001	0.556	3.565	5.966	7.237	0.62
TRINITY_DN26825_c0_g1_i5	0	0.388	0	0.562	0.153	0.113	0.167	0	0.098	0.618	0.983	4.928	1.046	1.309	0	0	1.401	1.684	1.411	0.905
TRINITY_DN26833_c0_g1_i3	0	0.097	0.389	0	0	0	0.737	0	0.377	0.508	0.878	4.968	0.052	3.564	0.584	0.639	1.841	1.221	0.72	0
TRINITY_DN26842_c0_g2_i1	0	0.653	0.667	0.378	0	0.061	0.59	0.035	0.074	1.652	0.335	6.741	1.709	4.635	1.063	0	3.82	2.414	2.275	0.136
TRINITY_DN26859_c0_g1_i2	0	0.406	0.259	0.31	0.405	0	0.462	0	0	0.535	0.837	4.868	1.202	3.24	0.613	0	0.833	1.369	1.104	0
TRINITY_DN26879_c0_g1_i1	0.166	0.556	8.858	3.886	0.274	0.082	3.097	0.105	0.393	7.818	3.388	35.518	4.071	20.689	5.66	2.626	36.271	17.224	18.89	0.769
TRINITY_DN26879_c0_g1_i2	0	0	0	0	0	0	0	0	0	0.489	0	4.648	0	0.774	0.431	0	2.576	2.377	1.91	0
TRINITY_DN26879_c0_g1_i3	0	0	0.093	0	0	0	0	0	0	0.231	0	0.992	0.062	0.755	0	0.333	0.206	0.389	0.48	0
TRINITY_DN26895_c0_g1_i1	0	0	1.659	0.436	0	0.123	0.56	0	0	2.012	0.45	9.726	1.098	0.354	0.737	0.847	3.154	1.832	3.215	0.211
TRINITY_DN26895_c0_g1_i2	0	0	0.13	0.184	0	0.297	0	0	0	0.332	0.303	3.065	0.518	0	0	0.403	0.725	0.481	2.649	0
TRINITY_DN26921_c0_g1_i1	0	0.062	0.259	0	0	0	0.423	0	0.107	0	0.586	6.811	0.073	5.495	0.192	0.347	6.024	1.841	1.881	0			sp|Q9US41|URG1_SCHPO	Uracil-regulated protein 1 OS=Schizosaccharomyces
TRINITY_DN26922_c0_g1_i4	0	0	0	0.126	0	0.102	0.344	0	0	0.618	0	0.922	0.3	2.179	0	0	1.508	1.776	0.557	0
TRINITY_DN26927_c0_g1_i1	0.77	1.288	9.006	8.837	1.424	1.496	4.749	0.272	0.656	1.837	6.964	49.121	2.03	49.931	9.509	10.294	72.983	10.786	12.142	2.456
TRINITY_DN26928_c0_g1_i1	0	0	3.363	0.93	0	0	1.612	0	0.279	4.763	3.095	23.308	2.082	22.687	3.141	1.75	21.941	9.852	9.848	0			sp|A7RK30|QORL2_NEMVE	Quinone oxidoreductase-like protein 2 homolog
TRINITY_DN26935_c0_g1_i2	0	7.374	5.383	1.957	0	0.584	6.401	1.283	1.156	7.745	5.323	50.293	4.465	54.28	8.332	1.542	35.782	23.098	15.117	0
TRINITY_DN26938_c0_g1_i2	2.112	92.231	144.911	28.923	11.292	3.423	44.991	5.923	2.786	143.334	19.513	472.697	111.094	278.698	68.989	34.118	219.411	169.253	237.051	8.272			sp|Q10232|RL9A_SCHPO	60S ribosomal protein L9-A OS=Schizosaccharomyces
TRINITY_DN26938_c0_g1_i5	0	0	2.492	0.368	0.953	0.533	2.714	0	0	13.348	1.244	13.863	0.414	0.487	4.032	2.403	16.142	13.663	6.767	0			sp|Q10232|RL9A_SCHPO	60S ribosomal protein L9-A OS=Schizosaccharomyces
TRINITY_DN26940_c0_g1_i2	0	1.491	2.946	1.153	0.416	0.215	2.163	0.132	0.123	4.015	1.84	17.569	4.051	9.308	2.471	1.542	5.955	3.617	5.413	0.409			sp|E3L408|RRG9_PUCGT	Required for respiratory growth protein
TRINITY_DN26941_c0_g1_i2	0	0	0	0	0	0	0.265	0	0	0.471	0	1.763	0	1.787	0.124	0.361	0.588	0.629	0.624	0			sp|Q9VLS9|LACB2_DROME	Beta-lactamase-like protein 2 homolog OS=Drosophila
TRINITY_DN26941_c0_g1_i3	0.058	0.379	1.038	0.669	0.044	0	0.206	0	0.033	1.098	0.429	6.25	0.622	4.3	0.833	0	4.829	2.516	3.129	0.335			sp|Q9VLS9|LACB2_DROME	Beta-lactamase-like protein 2 homolog OS=Drosophila
TRINITY_DN26943_c0_g1_i2	0.406	8.415	12.249	3.779	1.095	0.215	4.818	0.193	0.606	11.243	3.2	47.087	11.458	30.609	8.15	4.765	26.378	17.687	24.15	1.178			sp|Q5AUI1|LBSA_EMENI	Lactobacillus shifted protein OS=Emericella
TRINITY_DN26946_c0_g1_i3	0.066	2.717	0.473	0.552	0.044	0.061	0.846	0.123	0.188	3	0.941	9.636	1.948	5.6	1.599	0	5.946	3.811	4.713	0.074			sp|O08654|CP070_RAT	UPF0183 protein C16orf70 homolog OS=Rattus
TRINITY_DN26950_c0_g1_i1	0	0	0	0	0	0	0	0	0	1.818	0	2.204	0	0	0.766	0.708	2.88	0.259	1.392	0
TRINITY_DN26950_c0_g1_i3	0	0	0	0	0	0	0	0	0	0	0	1.362	0.632	0	0.354	0	0.989	0.426	0	0
TRINITY_DN26951_c0_g1_i3	5.474	54.001	83.732	19.631	5.049	1.025	79.502	6.433	11.359	99.562	154.555	1284.38	27.39	1578.78	79.379	140.126	1015.5	347.182	314.817	4.787			sp|P22151|GRG1_NEUCR	Glucose-repressible gene protein OS=Neurospora
TRINITY_DN26953_c0_g1_i1	0	0.123	0.195	0	0.055	0.041	0.059	0.053	0.025	0.175	0.094	1.613	0.073	2.37	0.105	0.264	1.44	0.342	0.24	0.186
TRINITY_DN26960_c0_g1_i1	0.025	1.164	2.075	0.349	0.066	0.195	0.757	0.07	0.066	2.003	0.627	16.657	0.995	8.065	1.149	1.278	8.649	5.772	6.354	0.186			sp|Q9WUA6|AKT3_MOUSE	RAC-gamma serine/threonine-protein kinase
TRINITY_DN26961_c0_g1_i1	0.025	0.714	0.547	0.203	0.044	0	0.256	0.018	0.041	0.932	0.324	3.556	0.539	2.685	0.546	0.417	2.576	1.665	1.613	0.099			sp|P41695|BUB1_YEAST	Checkpoint serine/threonine-protein kinase
TRINITY_DN26964_c0_g1_i2	0	0	0.649	0	0	0	0.265	0	0	0.498	0.617	10.728	0	8.343	0.651	1.097	8.718	2.081	2.496	0
TRINITY_DN26969_c0_g2_i1	0.157	1.156	4.308	0.911	0.427	0	1.239	0.105	0.098	2.769	0.387	13.292	2.89	5.208	1.532	1.431	7.052	4.431	8.447	0
TRINITY_DN26980_c0_g1_i1	0	0	0	0	0	0	0.049	0	0	0.212	0	0.681	0.176	0.048	0.096	0	1.352	1.869	0	0
TRINITY_DN26980_c0_g1_i5	0	0	0	0.145	0	0	0.374	0	0	1.542	0	3.596	0	0.182	0.69	0.458	3.634	0.185	0.825	0
TRINITY_DN26986_c0_g1_i2	0.05	1.235	1.76	0.95	0.263	0.256	1.435	0	0.18	2.465	1.192	19.282	0.715	7.119	1.609	0.583	10.814	5.513	5.807	0
TRINITY_DN26989_c0_g1_i4	0	0	0	0	0	0	0	0	0	0	0	0.721	0	0.392	0.986	0	1.969	0.611	0.557	0.571
TRINITY_DN26993_c0_g1_i2	1.309	36.598	54.703	16.899	4.031	1.896	25.298	1.942	1.041	82.762	7.728	206.339	37.812	106.954	48.275	16.99	168.946	89.08	84.024	3.622			sp|P49741|TBAA_SCHCO	Tubulin alpha-1A chain OS=Schizophyllum
TRINITY_DN26994_c0_g1_i2	0.282	3.475	6.931	1.143	0.35	0.369	1.848	0.229	0.213	7.541	1.589	25.772	5.729	18.883	4.194	2.403	16.671	9.389	11.537	0.322			sp|P16370|RPB3_YEAST	DNA-directed RNA polymerase II subunit RPB3
TRINITY_DN26995_c0_g1_i1	0	0.476	0.158	0	0	0	0.275	0	0	0.637	0	2.404	0.508	0.44	0.891	0.25	1.763	0.851	1.891	0
TRINITY_DN27002_c0_g1_i2	0	1.182	1.26	0.649	0	0.061	1.249	0.097	0.172	1.588	1.192	16.157	0.849	7.349	1.877	0.375	10.902	6.133	5.625	0			sp|B0DK57|S2538_LACBS	Solute carrier family 25 member 38 homolog
TRINITY_DN27007_c0_g1_i1	0.215	0.706	0.296	0.543	0	0.451	0.364	0.22	0.533	0.517	1.673	10.287	1.14	8.524	0.239	0.042	0.519	0.712	0.768	0			sp|Q4P4N1|ATG18_USTMA	Autophagy-related protein 18 OS=Ustilago
TRINITY_DN27007_c0_g1_i2	0	1.958	3.743	1.008	0.285	0	2.124	0.097	0.18	4.228	0.889	20.333	1.419	11.133	2.835	1.973	16.906	9.852	9.224	0.36			sp|Q4P4N1|ATG18_USTMA	Autophagy-related protein 18 OS=Ustilago
TRINITY_DN27013_c0_g1_i1	0.025	0.035	0.195	0.165	0.044	0.072	0.177	0.018	0.016	0.055	0.471	4.127	0.021	3.622	0.22	0.57	6.249	0.796	1.2	0.025
TRINITY_DN27014_c0_g1_i2	0	0	0	0	0	0	0	0	0	1.542	0	5.078	0	3.345	0	0	3.066	2.063	2.294	0			sp|P28040|DPOA_SCHPO	DNA polymerase alpha catalytic subunit OS=Schizosaccharomyces
TRINITY_DN27019_c0_g1_i2	0.058	0.485	1.464	0.281	0.11	0.123	0.728	0.22	0.238	1.874	0	9.075	0.995	6.02	1.044	0	5.76	3.543	3.321	0
TRINITY_DN27019_c0_g2_i1	0	0.353	1.019	0.717	0.022	0.113	0.787	0.158	0.066	1.154	0.701	10.057	1.036	7.196	1.015	0.528	8.551	4.135	3.139	0.174			sp|Q09910|YAJB_SCHPO	Uncharacterized protein C30D11.11 OS=Schizosaccharomyces
TRINITY_DN27025_c0_g1_i1	0	0	0	0.165	0	0	0.059	0	0	0.295	0	1.933	0.073	0.717	0.105	0	0.441	0.509	1.209	0
TRINITY_DN27025_c0_g1_i3	0	0	0.158	0.252	0.077	0	0.216	0	0	0.471	0	3.165	0.259	1.873	0.354	0.458	1.126	1.027	0.921	0.136
TRINITY_DN27026_c0_g1_i2	0	8.618	13.37	3.13	0.329	0	6.578	0.615	0.074	12.803	2.259	63.985	7.687	46.195	8.839	4.042	41.002	20.952	27.922	1.488			sp|P46331|YXBG_BACSU	Uncharacterized oxidoreductase YxbG OS=Bacillus
TRINITY_DN27027_c0_g1_i1	0	3.581	5.124	0.979	0.175	0.154	1.819	0.316	0.164	5.501	2.583	23.028	3.709	23.623	2.097	2.167	4.036	6.679	8.907	0.571			sp|Q29551|SCOT1_PIG	Succinyl-CoA:3-ketoacid coenzyme A transferase
TRINITY_DN27027_c0_g1_i4	0	1.605	2.631	1.056	0.12	0	0.954	0.062	0.057	4.588	0.376	14.624	0.984	4.1	2.528	1.097	14.565	6.484	7.909	0.112			sp|Q29551|SCOT1_PIG	Succinyl-CoA:3-ketoacid coenzyme A transferase
TRINITY_DN27039_c0_g1_i1	0	0	0.686	0.116	0	0	0.6	0	0	2.077	0.241	6.29	0	4.014	0.105	1.903	2.654	1.924	3.321	0			sp|B1H369|HDAC8_XENTR	Histone deacetylase 8 OS=Xenopus tropicalis
TRINITY_DN27044_c0_g1_i4	0	0.653	0.028	0	0.12	0.092	0.6	0	0.049	0.794	0.878	6.781	1.388	8.868	0.182	0.653	0	1.323	0	0.099			sp|P0CO65|MCES_CRYNB	mRNA cap guanine-N7 methyltransferase OS=Cryptococcus
TRINITY_DN27045_c0_g1_i1	0	0.397	0.259	0.087	0.033	0	0.177	0	0	0.305	0.167	2.113	0.269	1.835	0.23	0.208	1.224	0.611	0.605	0
TRINITY_DN27049_c0_g1_i1	0	0.123	0.389	0.116	0	0	0.138	0	0.025	0.655	0.45	5.289	0.021	3.259	0.201	0.264	4.251	1.933	1.517	0.05
TRINITY_DN27054_c0_g1_i1	0	0.265	0.056	0.252	0	0	0.246	0	0	0.194	0.125	3.486	0.124	2.819	0.211	0.556	0	1.027	3.532	0.099
TRINITY_DN27058_c0_g1_i1	0.108	0	0	0	0.274	0	0	0.316	0	1.366	0.586	3.957	0	2.896	0	1.306	4.76	2.229	1.728	0.26
TRINITY_DN27058_c0_g1_i4	0.497	1.623	0	1.851	0	0.307	2.311	0	0	0.692	4.915	6.801	6.485	18.272	3.888	3.362	0.862	0	4.953	0.769
TRINITY_DN27063_c0_g1_i2	0	2.576	1.936	1.056	0	0.574	1.573	0.255	0	1.975	1.746	23.529	2.652	28.841	2.586	1.236	4.486	6.17	4.041	0.459
TRINITY_DN27063_c0_g1_i4	0	3.405	3.78	1.434	0.734	0.113	1.239	0.272	0.287	7.061	1.851	20.544	1.803	5.122	2.729	1.389	16.309	10.814	11.249	0.484			sp|P87232|RM04_SCHPO	54S ribosomal protein L4, mitochondrial
TRINITY_DN27067_c0_g1_i2	0	0.053	0.278	0	0	0	0	0	0	0.111	0	0.12	0	1.376	0.22	0.778	1.499	0.37	0.509	0
TRINITY_DN27069_c0_g1_i1	0.166	0	0	0	0	0.082	0.079	0.079	0.262	0.258	0.01	0	0.653	6.126	0	0.167	1.391	2.387	0.672	0.186			sp|Q9HGL3|SUM2_SCHPO	Protein sum2 OS=Schizosaccharomyces pombe
TRINITY_DN27070_c0_g1_i1	0.389	5.954	8.487	2.975	0.909	0.297	4.198	0.562	1.156	10.948	5.229	53.248	5.998	49.855	7.326	5.418	36.301	20.785	22.671	0.67			sp|Q00317|PX11B_CANBO	Peroxisomal membrane protein PMP30B OS=Candida
TRINITY_DN27083_c0_g1_i1	0.05	1.817	2.168	0.31	0	0.154	1.16	0.062	0.057	5.345	0.962	31.552	0.736	14.009	0.986	1.764	27.044	9.778	8.984	0.174
TRINITY_DN27083_c0_g2_i1	0	1.235	2.993	0.407	0.11	0.164	0.973	0.053	0.533	2.465	2.552	25.452	2.217	41.121	2.279	2.32	10.863	7.567	9.243	0.186
TRINITY_DN27087_c0_g1_i3	0.066	0.812	0	0.097	0.022	0.041	0.246	0	0.131	0.545	0.146	3.456	0.653	2.207	0.737	0.097	2.4	1.554	1.027	0.037
TRINITY_DN27090_c0_g1_i3	0	0	0	0	0	0	0.108	0	0.09	0.092	0.711	2.614	0	3.899	0	0.764	0.784	0.74	0.125	0
TRINITY_DN27095_c0_g1_i1	0.075	3.281	1.631	0.717	0.142	0.041	1.73	0.202	0.27	3.028	0.868	11.94	1.399	13.398	1.8	1.278	11.431	5.791	5.135	0.124			sp|Q54RB9|CMC_DICDI	Calcium-binding mitochondrial carrier protein
TRINITY_DN27097_c0_g1_i1	0	0.088	0.241	0	0.055	0	0.108	0.097	0	0.388	0.063	0.411	0.59	0.956	0.239	0.194	0.441	0.435	0.202	0.087			sp|Q4WQ08|ADMB_ASPFU	Disintegrin and metalloproteinase domain-containing
TRINITY_DN27103_c0_g1_i1	0.083	10.788	15.223	2.374	0.405	0.615	4.71	0.721	0.664	11.178	3.503	39.976	7.469	47.428	7.585	4.89	25.614	16.567	21.865	0.794			sp|Q8ENY0|DEOD_OCEIH	Purine nucleoside phosphorylase DeoD-type
TRINITY_DN27111_c0_g1_i2	2.427	84.786	116.559	18.749	9.014	2.726	37.047	2.962	3.54	112.789	18.457	391.524	107.085	220.855	59.881	24.116	177.282	132.612	200.04	10.443			sp|Q6BXH8|RS6_DEBHA	40S ribosomal protein S6 OS=Debaryomyces
TRINITY_DN27111_c0_g1_i4	0	16.301	35.357	6.57	2.245	0.922	12.497	1.257	1.09	44.519	6.86	147.553	19.88	72.618	18.961	6.737	62.287	50.359	56.294	4.018			sp|Q6BXH8|RS6_DEBHA	40S ribosomal protein S6 OS=Debaryomyces
TRINITY_DN27113_c0_g2_i1	0.199	1.103	2.038	0.32	0.088	0.072	0.964	0.123	0.197	3.655	0.575	11.92	1.015	8.323	2.528	0.681	8.492	4.94	4.799	0.149
TRINITY_DN27114_c0_g1_i1	0	1.932	2.252	0.775	0.164	0.143	0.973	0.026	0.082	2.271	0.795	11.819	1.761	8.562	1.81	0.875	7.405	3.645	5.001	0.223			sp|P46892|CD11B_RAT	Cyclin-dependent kinase 11B OS=Rattus norvegicus
TRINITY_DN27119_c0_g1_i2	1.698	29.717	44.632	8.943	1.818	1.64	16.95	2.065	2	39.572	13.511	146.311	28.758	127.06	25.971	19.546	76.941	53.753	64.731	3.473			sp|Q9CPU4|MGST3_MOUSE	Microsomal glutathione S-transferase 3
TRINITY_DN27120_c0_g1_i1	0	1.182	1.028	0.165	0.153	0	0.423	0.088	0.082	1.292	0.188	6.29	1.098	5.256	0.575	0.181	2.615	2.081	2.582	0			sp|O94394|YQF1_SCHPO	Uncharacterized WD repeat-containing protein
TRINITY_DN27123_c0_g1_i4	0	0.961	0.037	0.078	0	0	0	0	0	0.978	0	3.065	0.456	3.794	0.297	0.708	2.155	1.776	1.622	0.062
TRINITY_DN27142_c0_g1_i1	0	0	0.862	0.116	0.164	0	0.669	0.132	0.041	1.403	0.293	5.329	0.642	2.599	1.006	0.333	1.646	1.249	1.421	0.521			sp|Q9ZVN4|Y1500_ARATH	Probable tyrosine-protein phosphatase At1g05000
TRINITY_DN27142_c0_g1_i4	0.306	1.72	0.612	0.349	0.142	1.107	0.796	0	0	0.757	2.478	7.492	2.238	8.065	0.249	0.653	1.371	3.339	2.448	0.434			sp|P53965|SIW14_YEAST	Tyrosine-protein phosphatase SIW14 OS=Saccharomyces
TRINITY_DN27145_c0_g1_i1	0.704	13.558	17.753	2.81	0.427	0.605	6.745	0.185	0.754	20.898	4.998	74.843	12.659	53.295	11.31	7.21	37.084	27.113	30.417	0.732			sp|Q9Y706|CYB5_MORAP	Cytochrome b5 OS=Mortierella alpina PE=1
TRINITY_DN27152_c0_g1_i1	0	0.415	4.503	1.415	0.34	0.092	2.566	0.105	0.148	3.628	0.199	20.764	1.285	2.16	1.896	0.889	27.701	7.733	9.598	0.397			sp|P38925|SMF1_YEAST	Manganese transporter SMF1 OS=Saccharomyces
TRINITY_DN27152_c0_g1_i3	0.215	1.605	7.116	4.418	0.394	0.369	4.533	0.035	0.107	10.311	3.534	53.167	5.977	16.274	9.864	6.599	5.475	10.12	13.39	1.029			sp|P38925|SMF1_YEAST	Manganese transporter SMF1 OS=Saccharomyces
TRINITY_DN27153_c0_g1_i2	0.845	14.625	18.985	4.215	2.607	0.615	8.062	0.545	0.754	22.44	5.375	77.367	16.244	56.669	13.493	8.793	42.53	30.776	36.435	1.364			sp|P23724|PSB6_YEAST	Proteasome subunit beta type-6 OS=Saccharomyces
TRINITY_DN27153_c0_g1_i3	0	0	0	0	0	0	0	0	0	0.231	0	1.212	0.124	0.784	0	0	0.353	0.352	0.192	0			sp|P23724|PSB6_YEAST	Proteasome subunit beta type-6 OS=Saccharomyces
TRINITY_DN27157_c0_g1_i2	0.083	0.856	0.945	0.223	0.055	0.123	0.551	0.026	0	1.523	0.251	4.588	1.005	2.857	0.843	0.458	2.85	1.443	2.112	0
TRINITY_DN27165_c0_g1_i1	0.058	0.423	0.908	0.194	0.077	0.061	0.275	0	0.033	0.988	0.22	4.588	0.135	2.571	0.699	0.222	2.899	1.758	1.862	0.099
TRINITY_DN27166_c0_g1_i1	0.099	0.45	0.584	0.203	0.033	0.051	0.737	0.035	0.115	1.154	0.586	7.562	0.29	3.67	0.642	0.125	5.838	2.646	2.851	0.174			sp|Q75A82|ANT1_ASHGO	Peroxisomal adenine nucleotide transporter
TRINITY_DN27175_c0_g1_i1	0.075	0	0.723	0.688	0.131	0	0.56	0.097	0.164	1.015	0	6.861	1.285	7.005	1.436	0.514	3.085	2.414	0	0.36		Serine_Peptidases	sp|P38129|TAF5_YEAST	Transcription initiation factor TFIID subunit
TRINITY_DN27182_c0_g1_i4	0	0	0.76	0	0.044	0.195	0.187	0	0	1.034	0.251	3.285	1.129	3.039	0	0.82	2.331	0	3.609	0.223
TRINITY_DN27185_c0_g1_i4	0.157	1.588	2.344	1.405	0.208	0.082	1.514	0.51	0.426	3.406	1.37	16.387	0.684	14.468	2.03	1.014	11.96	5.698	7.775	0			sp|A0A097ZPD4|ANDH_EMEVA	Oxidoreductase andH OS=Emericella variicolor
TRINITY_DN27189_c0_g1_i1	1.375	7.357	46.29	35.425	4.228	6.374	20.932	1.116	4.032	8.345	43.564	293.853	16.264	604.653	36.084	111.967	250.158	75.649	90.369	13.196
TRINITY_DN27193_c0_g1_i3	0	0.794	1.056	0.397	0	0.041	0.737	0.07	0.025	1.985	0.805	7.472	0.352	5.179	0.642	0.486	6.2	4.227	4.003	0			sp|P0CP30|NPL4_CRYNJ	Nuclear protein localization protein 4 OS=Cryptococcus
TRINITY_DN27201_c0_g1_i3	0	0	0	0	0	0	0.138	0	0	0	0	0.431	0.083	1.873	0.287	0	1.195	0.833	0.317	0
TRINITY_DN27202_c0_g1_i1	0	0.459	6.393	0.833	0	0	1.927	0	0	7.551	1.234	18.991	3.854	9.279	4.022	1.25	14.134	7.289	19.533	1.637
TRINITY_DN27202_c0_g1_i2	0	6.51	10.766	2.248	0.548	0.123	3.549	0.378	0.418	14.068	1.705	39.655	11.012	18.692	6.004	3.334	20.295	16.706	19.619	0.955			sp|Q09177|RPAC2_SCHPO	DNA-directed RNA polymerases I and III
TRINITY_DN27208_c0_g1_i1	0.116	5.337	2.214	0.581	0.208	0.072	2.399	0.299	0.377	5.012	1.14	19.993	3.781	15.538	2.672	1.264	11.823	7.604	7.794	0.471			sp|Q66KH2|ERGI3_XENLA	Endoplasmic reticulum-Golgi intermediate
TRINITY_DN27210_c0_g1_i2	0	0	0	0	0	0	0.059	0	0	0.12	0	1.302	0	1.223	0.029	0	1.244	0.87	0.547	0
TRINITY_DN27219_c0_g1_i2	0	0	0.445	0.155	0	0.051	0.079	0	0.033	0.194	0.429	3.576	0	2.494	0.172	0.486	0.901	0.86	1.622	0.186			sp|Q10199|IMP2_SCHPO	Septation protein imp2 OS=Schizosaccharomyces
TRINITY_DN27227_c0_g1_i1	0	0.988	0.315	0.078	0	0.061	0.354	0.035	0.033	0.674	0.272	4.818	0.124	7.205	0.354	0.069	1.802	0.805	0.566	0
TRINITY_DN27228_c0_g2_i1	0	0.097	0.352	0.048	0.022	0	0.02	0	0.016	0.12	0.178	1.763	0.083	0.889	0.153	0.083	0.921	0.37	0.729	0
TRINITY_DN27229_c0_g1_i1	4.779	180.324	236.778	46.646	20.952	9.294	75.795	6.934	10.244	290.683	41.682	986.783	257.089	648.965	146.922	74.89	377.288	290.783	385.528	17.525			sp|Q4PEF8|H2B_USTMA	Histone H2B OS=Ustilago maydis (strain 521
TRINITY_DN27229_c0_g1_i2	0	0.097	0.167	0.116	0	0.174	0.265	0	0.09	1.818	0.565	5.189	4.382	3.956	0.01	0.57	2.723	2.581	3.811	0			sp|P78567|H2B_AGABI	Histone H2B OS=Agaricus bisporus GN=htbA
TRINITY_DN27232_c0_g1_i2	0	1.702	0	0.223	0	0.113	0.442	0.132	0.033	1.182	0.722	5.699	0.539	5.734	0.929	0.347	2.468	1.582	2.073	0.124			sp|C8VCP8|PEX12_EMENI	Peroxisome assembly protein 12 OS=Emericella
TRINITY_DN27237_c0_g1_i2	0	0.256	0.232	0.378	0.099	0	0.324	0	0.172	0.406	0.345	2.945	0.373	2.991	0.632	0.834	0.676	1.267	0.653	0
TRINITY_DN27244_c0_g1_i1	0.439	2.514	5.967	1.008	0.296	0.092	2.694	0	0.156	7.145	1.757	30.45	4.89	30.886	4.357	2.653	19.933	11.859	15.617	0.198			sp|P53173|ERV14_YEAST	ER-derived vesicles protein ERV14 OS=Saccharomyces
TRINITY_DN27249_c0_g1_i1	0.182	0.723	0.222	0.068	0	0	0.138	0.062	0.27	0.295	0.659	6.731	0.28	8.457	0.469	0.597	2.586	1.064	1.833	0.112
TRINITY_DN27251_c0_g1_i5	0.075	3.07	4.095	0.93	0.099	0.143	1.898	0.141	0.18	3.388	1.506	15.165	2.02	9.317	3.179	1.306	9.472	6.346	6.92	0.335
TRINITY_DN27252_c0_g1_i1	0.166	2.249	8.367	1.463	0.887	0.297	2.841	0.404	0.205	9.84	1.286	30.7	5.2	14.076	5.171	0	22.01	13.912	14.609	0.707
TRINITY_DN27255_c0_g1_i5	0	0	0	0	0	0	0.029	0	0	0.166	0	2.634	0.601	0.487	0.172	0	0.284	0	0	0			sp|Q10LJ2|MTP2_ORYSJ	Metal tolerance protein 2 OS=Oryza sativa
TRINITY_DN27258_c0_g1_i1	0	0	0	0	0	0	0	0	0	0.111	0	0.25	0.477	0.22	0	0	0.529	0	0.25	0			sp|O94727|FRP2_SCHPO	Ferric/cupric reductase transmembrane component
TRINITY_DN27259_c0_g1_i2	0	0.388	1.019	0.029	0	0	0.511	0	0	0.369	0.722	7.613	0.135	6.422	0.345	0.472	3.399	1.869	1.862	0	CDS82437.1|GH47		sp|Q0D076|MNS1B_ASPTN	Probable mannosyl-oligosaccharide alpha-1,2-mannosidase
TRINITY_DN27261_c0_g1_i4	0	0.318	0.176	0.223	0	0	0	0.167	0	0.231	0.282	0.411	0.404	3.698	0.287	0	1.087	0.879	0.202	0
TRINITY_DN27264_c0_g1_i5	0	0	0	0	0.099	0	0	0	0	0.102	0	3.165	0	3.297	0	0	0.813	0.934	0.365	0			sp|Q5U2S3|ZUFSP_RAT	Zinc finger with UFM1-specific peptidase
TRINITY_DN27268_c0_g1_i4	0	0	0.528	0.514	0.066	0	0.757	0.088	0	1.542	1.025	6.25	0	6.622	0.603	1.014	5.387	2.451	2.784	0			sp|P84285|ARE2_CANAX	Sterol O-acyltransferase 2 OS=Candida albicans
TRINITY_DN27271_c0_g1_i1	0	0.653	0.454	0.203	0.022	0.164	0.403	0.044	0.074	0.711	0.376	4.457	0.497	3.115	0.642	0.292	1.695	1.452	0.931	0.186
TRINITY_DN27272_c0_g1_i2	0	0.741	1.408	0	0	0	0.777	0	0.377	2.751	2.165	17.138	0.57	13.245	1.283	1.639	15.075	6.512	4.79	0			sp|A7NRA6|UPP_ROSCS	Uracil phosphoribosyltransferase OS=Roseiflexus
TRINITY_DN27273_c0_g1_i3	0.398	5.795	5.68	0.63	0.164	0.154	2.301	0.352	0.385	5.317	2.133	23.058	2.538	26.136	4.951	2.848	21.285	10.629	12.401	0.347			sp|Q02253|MMSA_RAT	Methylmalonate-semialdehyde dehydrogenase
TRINITY_DN27277_c0_g1_i2	0.017	0.512	2.057	0	0	0	0	0.519	0	6	0.659	8.784	1.088	2.657	0.709	0.445	16.593	18.269	1.968	0			sp|Q55A45|RSMB_DICDI	Small nuclear ribonucleoprotein-associated
TRINITY_DN27279_c0_g1_i1	0	2.532	3.938	0.853	0.613	0.195	1.73	0.097	0.221	4.505	1.307	13.973	2.984	12.232	2.298	1.389	8.865	6.688	6.872	0.223			sp|B1WC40|NCBP2_RAT	Nuclear cap-binding protein subunit 2 OS=Rattus
TRINITY_DN27281_c0_g1_i2	0	0.318	0.352	0.581	0.066	0	0.757	0	0.057	1.163	0.805	7.663	0.684	7.674	0.881	0.375	1.881	1.915	1.929	0.112
TRINITY_DN27281_c0_g1_i3	0	0.097	0.278	0.048	0	0.041	0	0	0	0.554	0.052	1.783	0.3	0.105	0.431	0	3.321	1.304	0.701	0			sp|Q5HZX7|LDAH_RAT	Lipid droplet-associated hydrolase OS=Rattus
TRINITY_DN27283_c0_g1_i3	0	0	0	0	0	0	0	0	0	0.24	0	1.673	0	1.863	0.249	0	1.636	2.128	0	0
TRINITY_DN27283_c0_g1_i5	0	0	0	0	0	0	0	0	0	0	0	1.352	0	1.07	0	2.667	4.398	0.592	0	0
TRINITY_DN27283_c0_g1_i8	0.083	1.138	3.966	0.63	0	0.041	1.888	0	0.123	2.723	3.712	41.659	0.611	47.695	1.944	1.389	45.861	13.098	11.844	0.149
TRINITY_DN27297_c0_g1_i6	0	0.265	0.908	0.64	0.142	0.174	0.767	0	0	2.077	0.178	7.082	0.943	0.908	1.81	1.542	2.664	1.804	1.382	0
TRINITY_DN27300_c0_g1_i3	0	0.123	0.63	0.068	0.088	0	0.118	0	0.066	0.692	0.387	2.755	0.528	2.494	0.46	0.458	1.332	1.212	0.95	0
TRINITY_DN27303_c0_g1_i1	0	0.203	0.287	0.019	0	0	0.079	0	0.033	0.914	0.084	1.322	0.767	3.134	0.287	0.208	0.49	0.879	0.883	0.062		Serine_Peptidases	sp|Q9QUR6|PPCE_MOUSE	Prolyl endopeptidase OS=Mus musculus GN=Prep
TRINITY_DN27306_c0_g1_i2	0.058	0.573	0.519	0.213	0.033	0.031	0.433	0.088	0.221	0.517	0.627	5.729	0.093	4.883	0.613	0.528	6.357	2.71	1.958	0
TRINITY_DN27310_c0_g1_i1	0.331	13.178	22.33	2.829	1.402	0.451	6.45	1.063	0.721	17.806	5.563	70.816	14.835	57.51	10.381	4.973	36.849	25.947	33.969	0.509			sp|P25451|PSB3_YEAST	Proteasome subunit beta type-3 OS=Saccharomyces
TRINITY_DN27318_c0_g1_i1	0	0	0	0	0	0	0	0	0	0	0	0.371	0	0	0.172	0.333	0.872	1.027	0	0			sp|O94726|MNL1_SCHPO	ER degradation-enhancing alpha-mannosidase-like
TRINITY_DN27322_c0_g1_i1	0	0	0	0	0.23	0	0	0	0	0.582	0	6.27	0.3	0	0.508	0	1.655	0.759	1.277	0			sp|Q8CCF0|PRP31_MOUSE	U4/U6 small nuclear ribonucleoprotein Prp31
TRINITY_DN27322_c0_g1_i2	0.041	2.214	3.039	0.756	0.241	0.143	1.219	0.255	0.213	4.052	0.68	8.664	2.403	10.808	1.944	1.167	7.905	6.179	6.546	0.459			sp|Q8CCF0|PRP31_MOUSE	U4/U6 small nuclear ribonucleoprotein Prp31
TRINITY_DN27326_c0_g1_i1	0	0.882	0.964	0	0.197	0.123	0.305	0	0.074	1.985	0.471	2.314	0.86	4.52	1.226	0.375	4.065	2.192	1.641	0.074			sp|Q09875|YAGC_SCHPO	Uncharacterized protein C12G12.12 OS=Schizosaccharomyces
TRINITY_DN27332_c0_g1_i1	0	0.441	0.306	0	0	0	0	0	0.098	0.323	0	5.489	0.01	0.382	0.354	0.875	2.028	1.008	1.641	0
TRINITY_DN27335_c0_g1_i2	0	0.926	1.232	0.388	0.11	0.225	0.718	0.053	0.098	1.68	0.784	9.666	1.14	6.278	1.829	0.834	6.112	3.756	4.051	0			sp|P27526|PHR_NEUCR	Deoxyribodipyrimidine photo-lyase OS=Neurospora
TRINITY_DN27336_c0_g1_i2	0.033	1.235	1.899	0.862	0.12	0.143	1.249	0.114	0.025	2.834	0.303	9.736	1.865	3.593	1.513	0.375	9.08	5.023	5.365	0.087			sp|Q9FKA7|ORTH1_ARATH	E3 ubiquitin-protein ligase ORTHRUS 1 OS=Arabidopsis
TRINITY_DN27336_c0_g2_i1	0	6.219	12.277	3.217	1.314	0.717	4.906	0.826	0.41	12.351	4.183	43.632	8.277	40.442	8.523	2.848	25.8	16.151	19.667	0.533			sp|Q962X9|BUD31_BRABE	Protein BUD31 homolog OS=Branchiostoma
TRINITY_DN27336_c0_g3_i1	0	0	0	0	0	0	0	0	0	0	0	1.232	0	0.688	0.115	0	1.185	0	0.451	0			sp|Q4PG15|SWC4_USTMA	SWR1-complex protein 4 OS=Ustilago maydis
TRINITY_DN27336_c0_g4_i1	0.025	0.538	0.454	0.087	0.066	0.01	0.236	0.053	0.049	0.554	0.084	2.514	0.145	2.016	0.402	0.222	2.41	1.193	0.768	0			sp|Q9QXL2|KI21A_MOUSE	Kinesin-like protein KIF21A OS=Mus musculus
TRINITY_DN27341_c0_g1_i1	0	1.191	2.983	0.601	0.613	0.143	1.337	0.044	0.123	5.594	0.784	11.309	4.092	8.352	2.327	1.278	7.493	4.792	5.068	0.248
TRINITY_DN27344_c0_g1_i1	0	5.848	6.551	1.531	0.679	0.482	4.149	0.237	0.328	6.535	1.464	33.425	8.422	35.673	5.076	2.653	22	9.417	12.948	0.434
TRINITY_DN27345_c0_g1_i1	0	0	1.167	0	0.197	0	0.639	0	0	0.988	1.903	13.142	0.124	14.822	0.967	0	4.711	2.146	4.156	0
TRINITY_DN27345_c0_g1_i2	0.124	3.731	2.641	0.572	0.405	0.256	2.222	0.316	0.287	5.16	1.935	26.173	2.849	20.957	3.505	1.709	18.346	10.934	10.961	0.099
TRINITY_DN27346_c0_g1_i1	0	0.273	0	0	0	0	0	0.079	0	1.154	0	3.325	0	2.38	0.833	0.181	2.165	1.989	0.902	0			sp|P0C606|SGF29_RAT	SAGA-associated factor 29 OS=Rattus norvegicus
TRINITY_DN27361_c0_g1_i1	0.041	0.776	0.463	0.029	0.153	0.082	0.138	0	0.115	0.655	0.157	2.825	1.026	3.02	0.373	0.208	2.057	0.712	1.171	0.087
TRINITY_DN27362_c0_g1_i2	0	0.088	0.232	0.436	0.033	0.246	0.442	0	0.057	0.148	0.23	4.658	0.207	2.571	0.46	0.375	3.908	1.933	1.872	0
TRINITY_DN27368_c0_g1_i2	0	0.318	2.326	0.262	0.12	0.051	0.128	0	0.139	3.766	0.387	13.152	1.979	3.412	1.015	0.236	6.347	4.024	4.406	0.335			sp|C8V213|MDJ1_EMENI	DnaJ homolog 1, mitochondrial OS=Emericella
TRINITY_DN27371_c0_g1_i10	0	0	0	0	0.11	0	0	0	0.139	0.683	0	0.851	0.352	2.341	0	0	0.607	1.258	2.064	0			sp|Q84WK5|GID8_ARATH	Protein GID8 homolog OS=Arabidopsis thaliana
TRINITY_DN27372_c0_g1_i2	0.091	1.614	1.167	0.252	0.296	0	0.58	0	0.107	2.557	0.868	11.629	2.631	3.842	1.944	0.708	4.32	3.709	5.087	0.409			sp|Q4PER6|REXO4_USTMA	RNA exonuclease 4 OS=Ustilago maydis (strain
TRINITY_DN27373_c0_g1_i4	0.133	8.009	16.409	3.866	1.544	0.492	4.552	0.527	0.32	21.314	3.378	58.076	16.057	21.033	8.475	3.098	25.81	22.284	29.217	1.253			sp|Q9P7H0|NHP2_SCHPO	H/ACA ribonucleoprotein complex subunit
TRINITY_DN27378_c0_g1_i4	0	0	0	0	0	0.031	0.108	0.018	0.016	0.111	0	0.11	0.186	0.898	0.057	0.361	0.411	0.342	0.317	0
TRINITY_DN27381_c0_g1_i1	0.373	1.376	23.896	12.025	0.504	0.656	9.193	0.158	0.18	21.729	2.07	160.714	7.366	24.598	15.255	7.39	111.655	53.735	107.147	2.753			sp|P13707|GPDA_MOUSE	Glycerol-3-phosphate dehydrogenase [NAD(+)],
TRINITY_DN27382_c0_g1_i1	0	0.062	0.287	0.145	0.131	0.031	0.216	0.035	0.033	1.551	0.021	3.175	0.238	1.558	0.747	0.361	3.291	1.97	1.161	0.074			sp|A9QM73|SMG7_ARATH	Protein SMG7 OS=Arabidopsis thaliana GN=SMG7
TRINITY_DN27386_c0_g1_i3	0.05	0.415	0.417	0.136	0.033	0	0.226	0	0.115	0.702	0.335	3.616	0.238	1.94	0.316	0.222	2.801	1.48	1.056	0.025
TRINITY_DN27390_c0_g1_i1	0.232	1.041	1.232	0.242	0.055	0.082	0.324	0.07	0.066	0.582	0.763	4.718	1.129	6.718	1.484	1.056	2.39	1.767	1.593	0.087
TRINITY_DN27392_c0_g1_i6	0.075	2.532	1.093	0.252	0.208	0.246	0	0.202	0	1.495	1.244	14.584	0.963	15.605	1.772	1.264	6.524	5.051	4.751	0.273
TRINITY_DN27406_c0_g1_i2	0	10.259	19.383	6.376	2.059	0.799	8.524	0.905	0.541	26.889	5.208	108.739	27.877	47.17	11.578	4.473	47.359	42.533	55.325	2.381			sp|P0CN78|GAR1_CRYNJ	H/ACA ribonucleoprotein complex subunit
TRINITY_DN27408_c0_g1_i1	0	0.335	1.316	0.116	0.077	0.061	0.423	0	0.098	1.514	0.178	6.971	0.332	3.192	1.111	0.139	4.574	2.905	3.177	0
TRINITY_DN27408_c1_g1_i1	0	1.164	3.78	1.163	0.131	0.102	1.288	0.062	0	3.489	0.314	15.596	1.295	6.47	2.03	0.5	9.883	4.801	7.621	0.223
TRINITY_DN27409_c0_g1_i2	0	0.229	0.547	0	0.055	0.02	0.403	0.053	0.016	0.822	0.293	2.244	0.435	3.144	0.306	0.111	2.929	0.916	1.824	0.025			sp|P24339|CUT7_SCHPO	Kinesin-like protein cut7 OS=Schizosaccharomyces
TRINITY_DN27412_c0_g1_i3	0	0	0	0	0	0.123	0	0	0.549	0	1.339	12.21	0	6.575	0	2.487	0.558	0.814	0	0.074
TRINITY_DN27414_c0_g1_i2	0	2.046	1.872	0.795	0.427	0.164	1.475	0.158	0.336	4.274	0.837	13.903	2.579	11.42	1.925	1.084	8.336	5.152	6.201	0.087			sp|Q8BNI4|DERL2_MOUSE	Derlin-2 OS=Mus musculus GN=Derl2 PE=1
TRINITY_DN27415_c0_g1_i6	0	0.088	1.038	0	0.055	0	0	0	0	0.729	0.502	8.594	0.508	4.549	1.494	0	5.084	2.424	1.526	0
TRINITY_DN27416_c0_g1_i1	0	0.097	0.296	0.019	0	0	0.157	0.009	0.008	0.258	0.073	1.192	0.062	0.506	0.115	0	1.89	0.703	0.835	0			sp|A5WFR0|PIF1_PSYWF	ATP-dependent DNA helicase pif1 OS=Psychrobacter
TRINITY_DN27416_c0_g1_i2	0	0.335	0.612	0.281	0	0	0.501	0	0	0.212	0.669	4.287	0.124	7.846	0.22	0	0.852	1.508	2.496	0
TRINITY_DN27419_c0_g2_i1	0	0	0	0	0	0	0	0	0	0.738	0.795	2.745	0.145	0	0.105	0.417	1.939	0.823	1.142	0
TRINITY_DN27421_c0_g1_i2	0	0	0	0	0	0	0	0	0.016	0.074	0.073	0	0	0.258	0.182	0.056	0.118	0.13	0.518	0			sp|Q9Y7M8|YNTB_SCHPO	Probable RNA exonuclease C9B6.11c OS=Schizosaccharomyces
TRINITY_DN27421_c0_g1_i3	0	1.067	1.001	0	0	0.061	0.265	0.035	0.057	0.36	0.387	5.259	1.046	4.052	0.718	0.806	2.968	1.85	1.641	0.037			sp|Q9Y7M8|YNTB_SCHPO	Probable RNA exonuclease C9B6.11c OS=Schizosaccharomyces
TRINITY_DN27424_c0_g1_i3	0	0	0	0	0	0	0.118	0.062	0	0	0	2.364	0	1.357	0.077	0.514	1.028	0.86	0.173	0
TRINITY_DN27425_c0_g1_i2	0	2.038	3.058	0.862	0.131	0	2.232	0.554	0.246	6.295	0.899	24.3	2.735	7.97	3.064	1.973	18.748	10.693	9.368	0.124			sp|Q66H80|COPD_RAT	Coatomer subunit delta OS=Rattus norvegicus
TRINITY_DN27432_c0_g1_i4	0	0.353	0	0.194	0	0	0.226	0.07	0	1.717	0	4.217	0	1.758	0.278	0.139	3.614	2.868	2.63	0			sp|Q07538|PRP4_SCHPO	Serine/threonine-protein kinase prp4 OS=Schizosaccharomyces
TRINITY_DN27433_c0_g1_i1	0	0	0	0	0	0	0	0	0	0.222	0.293	3.115	0	4.233	0.077	0	1.293	0.333	0.25	0
TRINITY_DN27436_c0_g1_i2	0	0	0	0	0	0	0	0	0	0.148	0	1.132	0	0.239	0.086	0	0.137	0.49	0.202	0			sp|P18296|CUT1_SCHPO	Separin OS=Schizosaccharomyces pombe (strain
TRINITY_DN27449_c0_g1_i2	0	0.512	2.817	0.785	0.208	0	0.846	0.308	0	4.126	2.29	6.21	1.875	3.956	0.536	3.195	4.672	1.443	4.3	0			sp|Q5FVL2|EMC8_RAT	ER membrane protein complex subunit 8 OS=Rattus
TRINITY_DN27453_c0_g1_i1	0	0.6	0.584	0.455	0.077	0	0.433	0.026	0.09	0.48	0.272	4.227	0.197	5.122	0.46	1	3.771	1.647	1.257	0.05
TRINITY_DN27455_c0_g1_i4	0.803	37.947	46.948	9.845	4.107	1.076	17.963	2.426	3.336	54.304	10.823	185.335	35.999	125.502	28.327	13.517	101.967	75.501	102.539	3.932			sp|P62898|CYC_RAT	Cytochrome c, somatic OS=Rattus norvegicus
TRINITY_DN27461_c0_g1_i1	0	0.609	2.335	0.62	0.12	0.236	0.747	0	0	2.991	0.178	4.137	3.512	1.94	1.264	2.889	1.714	3.127	1.555	1.005
TRINITY_DN27470_c0_g1_i1	0	1.05	1.538	0.213	0.044	0	0.796	0.114	0.18	1.846	0.429	6.871	0.414	5.466	1.331	0.861	5.436	2.377	2.544	0
TRINITY_DN27475_c0_g1_i2	0	0.415	1.149	0.233	0.077	0	0.462	0.07	0.033	1.385	0.356	4.568	1.16	4.319	0.891	0.431	3.125	0.925	2.419	0.124			sp|Q8LF05|RBL19_ARATH	Rhomboid-like protein 19 OS=Arabidopsis
TRINITY_DN27488_c0_g1_i4	0.058	2.435	3.178	0.417	0.077	0.061	1.229	0.132	0.139	3.24	0.837	11.599	2.113	9.489	2.001	0.778	8.757	5.411	5.961	0.074			sp|O13914|SYA_SCHPO	Alanine--tRNA ligase OS=Schizosaccharomyces
TRINITY_DN27490_c0_g1_i1	0	2.884	2.094	0.397	0.471	0	1.868	0.308	0	8.806	0	24.19	2.528	7.072	4.357	1.264	13.028	11.748	14.829	0.881
TRINITY_DN27493_c0_g1_i5	0	0.556	0.945	0	0	0	0.315	0	0.156	1.209	0.157	7.182	0.114	3.995	1.034	0	7.846	1.064	2.342	0
TRINITY_DN27494_c0_g1_i2	0.157	2.77	2.298	0.824	0.208	0.164	0.6	0.202	0.09	3.028	1.171	9.405	1.575	9.04	1.81	1.514	4.888	4.19	3.033	0.446			sp|P46554|LCMT1_CAEEL	Probable leucine carboxyl methyltransferase
TRINITY_DN27501_c0_g1_i1	0.025	0.168	0.176	0.155	0	0.031	0.206	0.07	0.033	0.388	0.084	2.093	0.238	1.548	0.239	0.25	0.823	0.786	0.777	0
TRINITY_DN27502_c0_g1_i1	0	0.353	0.398	0.068	0.033	0.092	0.315	0	0.049	0.674	0.209	2.254	0.663	3.22	0.594	0	1.528	1.008	1.238	0
TRINITY_DN27507_c0_g1_i1	0.058	0.335	0.195	0.039	0.044	0.061	0.128	0	0.074	0.692	0.293	4.878	0.456	2.934	0.431	0.403	3.115	0.953	1.488	0.136
TRINITY_DN27509_c0_g1_i3	0.091	0.459	0.639	0.213	0.033	0	0.57	0	0.025	0.942	0.565	6.26	0	2.37	0.68	0.486	4.261	2.988	1.757	0
TRINITY_DN27514_c0_g1_i1	0.19	1.041	1.992	0.271	0.252	0.102	0.472	0.123	0.057	2.428	0.23	7.683	1.243	5.007	0.67	0.736	2.449	2.174	1.91	0.223			sp|O13802|EBP2_SCHPO	Probable rRNA-processing protein ebp2 OS=Schizosaccharomyces
TRINITY_DN27514_c0_g2_i1	0	3.44	9.534	2.461	0.635	0	3.5	0.202	0.188	12.064	1.077	31.782	6.599	11.42	4.721	2.556	14.624	14.06	22.038	1.277			sp|O13802|EBP2_SCHPO	Probable rRNA-processing protein ebp2 OS=Schizosaccharomyces
TRINITY_DN27516_c0_g1_i1	0	0.397	0.519	0.126	0.022	0	0.256	0.009	0.033	0.702	0.199	3.145	0.249	1.94	0.536	0.361	2.292	1.647	1.478	0.037			sp|O13769|ULP2_SCHPO	Ubiquitin-like-specific protease 2 OS=Schizosaccharomyces
TRINITY_DN27517_c0_g1_i1	0	0.018	0.139	0	0.12	0	0.088	0	0	0.222	0.031	1.192	0	0.506	0.211	0.181	1.518	0.777	0.317	0			sp|B8PBQ6|ERT1_POSPM	Transcription activator of gluconeogenesis
TRINITY_DN27517_c0_g1_i3	0.083	0.935	1.779	0.707	0.23	0	1.121	0.097	0.188	1.874	1.192	9.826	0.974	7.301	1.752	1.32	5.691	6.077	2.726	0.099			sp|B8PBQ6|ERT1_POSPM	Transcription activator of gluconeogenesis
TRINITY_DN27520_c0_g1_i2	0	0.168	0.12	0.174	0	0	0	0	0.09	0.489	0.596	1.863	0.114	1.405	0.517	0	1.577	0.564	0	0			sp|Q29RQ3|DC1I1_BOVIN	Cytoplasmic dynein 1 intermediate chain
TRINITY_DN27520_c0_g1_i5	0.058	1.367	2.085	0.484	0.164	0.041	1.416	0.158	0.221	2.428	0.272	10.868	1.771	5.982	1.417	1.403	5.857	4.81	5.231	0.099			sp|Q29RQ3|DC1I1_BOVIN	Cytoplasmic dynein 1 intermediate chain
TRINITY_DN27526_c0_g1_i2	0.34	4.71	10.183	2.248	1.544	0.174	4.877	0.387	0.205	11.954	3.012	38.473	6.112	25.792	6.531	3.431	30.786	18.353	19.187	0.198			sp|Q9DC70|NDUS7_MOUSE	NADH dehydrogenase [ubiquinone] iron-sulfur
TRINITY_DN27529_c0_g1_i1	0	1.808	3.799	1.26	0.372	0.287	1.18	0.176	0.279	3.545	1.265	13.853	2.279	5.476	1.781	1.681	6.259	3.839	5.461	0.322
TRINITY_DN27535_c0_g1_i3	0.845	21.029	24.516	10.562	1.752	1.363	13.273	1.643	1.574	30.48	9.15	134.742	21.568	115.631	19.153	15.503	80.114	42.773	52.666	2.617
TRINITY_DN27538_c0_g1_i2	0	0.503	0.241	0.271	0.11	0.061	0.462	0	0.033	0.351	0.356	4.017	0.694	1.357	0.22	0.139	2.214	0.87	1.257	0			sp|O74508|SPP1_SCHPO	Set1 complex component spp1 OS=Schizosaccharomyces
TRINITY_DN27540_c0_g1_i1	0.133	1.958	3.447	1.046	0.274	0.287	0.846	0.105	0.221	3.138	1.056	13.082	2.984	8.887	2.93	2.584	8.287	5.911	5.452	0.36			sp|Q9C0V1|AMT1_SCHPO	Ammonium transporter 1 OS=Schizosaccharomyces
TRINITY_DN27546_c0_g1_i1	0.017	0.494	0.852	0.223	0.033	0.031	0.403	0.044	0.008	1.348	0.136	4.618	0.984	1.682	0.709	0.333	2.733	1.915	1.862	0.198
TRINITY_DN27550_c0_g2_i1	0.306	7.806	8.904	2.364	0.482	0.43	4.07	0.334	0.926	9.378	3.158	44.113	5.439	40.079	6.234	2.82	25.663	16.133	17.776	1.079			sp|P40046|VTC1_YEAST	Vacuolar transporter chaperone 1 OS=Saccharomyces
TRINITY_DN27552_c0_g1_i2	0.182	3.52	5.207	1.56	0.241	0.061	2.193	0.114	0.287	6.415	2.834	27.105	3.522	18.176	3.85	2.862	15.378	10.268	8.12	0.136			sp|O53732|UFAA1_MYCTU	Tuberculostearic acid methyltransferase
TRINITY_DN27557_c0_g1_i3	0.282	3.802	5.207	1.114	0.701	0.092	1.976	0	0.131	5.908	2.311	21.806	5.097	20.661	3.256	2.806	15.888	9.463	7.602	0.434			sp|B5DEI4|UBE2W_RAT	Ubiquitin-conjugating enzyme E2 W OS=Rattus
TRINITY_DN27557_c0_g1_i7	0	0.035	0.222	0.145	0	0.031	0.265	0	0	1.246	0	1.623	0.746	3.488	0.297	0	0	0.509	1.852	0			sp|B5DEI4|UBE2W_RAT	Ubiquitin-conjugating enzyme E2 W OS=Rattus
TRINITY_DN27567_c0_g1_i1	0	0.397	0.482	0	0	0	0.275	0	0.033	0.554	0.397	6.621	0.259	3.02	0.105	0.292	6.847	2.303	1.814	0
TRINITY_DN27569_c0_g1_i3	0.306	5.107	5.328	2.364	0.329	0.195	2.92	0.237	0.172	5.058	0.544	27.696	2.559	17.45	4.127	2.584	14.144	7.243	8.504	0.211
TRINITY_DN27569_c0_g1_i4	0	0	0	0	0	0	0	0.167	0	0.083	0	1.112	0.238	1.921	0.086	0	0.539	0.574	0.586	0
TRINITY_DN27575_c0_g1_i1	0	0	0	0	0.088	0	0	0.185	0	0.554	0.251	3.506	0	5.868	1.12	0	0.215	0.731	0	0			sp|P21369|PNCA_ECOLI	Nicotinamidase OS=Escherichia coli (strain
TRINITY_DN27578_c0_g2_i2	0	1.058	0.232	0	0.329	0.061	0.924	0.035	0.197	0.822	0.261	8.644	0.549	9.432	1.599	0	5.769	0.916	2.016	0			sp|Q96TW9|MCH1_WICAO	Probable transporter MCH1 OS=Wickerhamomyces
TRINITY_DN27579_c0_g1_i2	0	1.958	1.177	0.659	0.296	0.102	0.718	0.062	0.148	2.64	0.471	8.574	2.507	6.24	1.187	1.667	3.957	3.561	3.359	0.223			sp|O14059|HIS9_SCHPO	Probable histidinol-phosphatase OS=Schizosaccharomyces
TRINITY_DN27599_c0_g1_i3	0.298	4.507	3.169	0.581	0.329	0.041	1.455	0.22	0.09	2.649	1.265	15.686	1.502	15.414	2.768	0.986	10.677	5.569	6.402	0.136			sp|Q00771|KCC1A_EMENI	Calcium/calmodulin-dependent protein kinase
TRINITY_DN27605_c0_g1_i3	0	2.637	5.189	1.269	0.559	0.369	2.379	0	0.893	3.351	3.932	24.951	1.834	15.233	4.233	2.264	18.934	8.196	5.49	0.558
TRINITY_DN27605_c0_g1_i4	0.05	1.085	0.704	0.523	0	0	0.511	0.378	0.107	0.683	0.439	6.641	1.761	5.514	1.599	0.153	2.576	2.997	1.344	0
TRINITY_DN27612_c0_g1_i1	0	0	0.167	0	0	0	0	0	0	0.591	0	4.958	0.518	4.3	0.498	0	2.919	0	2.006	0.149
TRINITY_DN27623_c0_g1_i2	0.058	6.924	12.453	2.8	0.701	0.4	4.002	0.431	0.311	10.855	3.053	43.512	8.329	28.812	5.89	3.487	23.371	14.255	18.39	0.608			sp|Q1MTR3|VID27_SCHPO	Vacuolar import and degradation protein
TRINITY_DN27625_c0_g1_i4	0.05	1.367	1.844	0.678	0.142	0	1.042	0.272	0.221	3.166	1.736	17.359	1.16	19.734	2.021	0	13.135	5.818	5.298	0			sp|O94321|MPR1_SCHPO	Multistep phosphorelay regulator 1 OS=Schizosaccharomyces
TRINITY_DN27631_c0_g1_i1	0	0.882	1.77	0.213	0.055	0.041	0.403	0.026	0.049	1.551	0.314	4.808	0.881	3.182	1.312	0.347	2.88	1.526	2.025	0.149
TRINITY_DN27635_c0_g1_i2	0	3.617	4.781	1.172	0.745	0.359	2.478	0.211	0.197	7.957	0.795	15.686	7.386	8.897	3.601	1.611	7.444	4.866	6.277	0.757
TRINITY_DN27636_c0_g1_i4	0	0	0.222	0.213	0	0	0	0	0	1.606	0	4.698	0.539	0	0.958	0	5.681	4.412	3.34	0.298			sp|P87308|LSB5_SCHPO	Protein lsb5 OS=Schizosaccharomyces pombe
TRINITY_DN27638_c0_g1_i3	0	0	0	0	0	0	0	0	0	0	0	0.962	0.653	2.198	0	0	0.666	0.712	0	0
TRINITY_DN27645_c0_g1_i1	0	0.635	2.168	0.417	0.033	0.092	0.796	0.088	0.082	1.818	0.837	7.783	1.098	4.931	1.609	1.417	6.915	4.718	6.393	0.161	AFY94139.1|GH37		sp|P32356|TREA_YEAST	Neutral trehalase OS=Saccharomyces cerevisiae
TRINITY_DN27648_c0_g2_i1	0	0	0	0	0	0	0	0	0	1.034	0	0.341	0	0	0	0	3.556	0.666	0.144	0			sp|O74349|LTN1_SCHPO	E3 ubiquitin-protein ligase listerin OS=Schizosaccharomyces
TRINITY_DN27649_c0_g1_i2	0.24	4.437	9.506	1.715	0.219	0.328	3.854	0.255	0.574	9.415	2.876	43.792	5.832	42.908	6.206	4.07	30.512	14.699	17.584	1.389
TRINITY_DN27655_c0_g1_i1	0	0	0.037	0.068	0	0	0.197	0	0.057	0.12	0.261	5.359	0	6.145	0.057	0.431	7.317	1.23	0.941	0
TRINITY_DN27663_c0_g1_i4	0	0.176	0.232	0.058	0.055	0	0	0	0.082	0.471	0	1.743	0	1.472	0.124	0.111	1.293	0.574	0.576	0.099
TRINITY_DN27674_c0_g1_i1	0	0	0	0	0	0	0	0	0	0.794	0	5.329	0.394	4.157	0.575	0	4.574	1.582	1.948	0
TRINITY_DN27676_c0_g1_i4	0	0	1.334	0	0	0	0.079	0	0.131	0.96	0.753	6.18	0	1.644	0.441	0.472	8.13	3.561	4.636	0			sp|O13716|AGN1_SCHPO	Glucan endo-1,3-alpha-glucosidase agn1 OS=Schizosaccharomyces
TRINITY_DN27680_c0_g1_i3	0.704	27.927	44.215	6.473	4.206	3.361	10.619	2.004	1.287	46.864	8.972	131.677	50.74	81.792	21.346	17.462	42.432	50.849	71.095	5.879			sp|O59804|CH10_SCHPO	10 kDa heat shock protein, mitochondrial
TRINITY_DN27697_c0_g1_i1	0	0.961	1.13	0	0	0	0.374	0	0	1.92	0.502	8.033	0.404	5.342	0.824	1.125	3.007	2.553	3.455	0
TRINITY_DN27697_c0_g1_i2	0	0	0	0	0	0	0	0	0	0	0	1.573	0	0.573	0.105	0	1.391	0.287	0.422	0
TRINITY_DN27709_c0_g1_i3	0	0.132	0.306	0	0	0	0.039	0	0	0.489	0.22	2.454	0.186	1.319	0.038	0.222	0.823	0.897	1.008	0		Serine_Peptidases	sp|D4AQA7|PEPS_ARTBC	Probable serine carboxypeptidase ARB_06414
TRINITY_DN27717_c0_g1_i1	0.133	0.168	0.797	0.068	0	0	0.374	0.035	0	0.434	0.115	5.279	0.435	1.854	0.373	0.097	3.781	1.915	2.774	0.062			sp|Q28HW9|CNEP1_XENTR	CTD nuclear envelope phosphatase 1 OS=Xenopus
TRINITY_DN27741_c0_g1_i2	0	0.168	0	0	0	0	0.423	0	0	0.729	0	2.795	0.777	0.917	1.207	0	2.929	1.351	1.545	0			sp|P0CD89|AQY2_YEASX	Aquaporin-2 OS=Saccharomyces cerevisiae
TRINITY_DN27757_c0_g1_i1	0	1.544	0.13	0.514	0.131	0	2.556	0	0.361	0	2.248	18.34	1.088	30.475	0.517	1.306	2.86	3.025	4.204	0
TRINITY_DN27757_c0_g1_i3	0.008	0.388	0.454	0.174	0.022	0	0.206	0.035	0.041	0.738	0.146	3.265	0.477	1.433	0.479	0.139	1.93	1.193	1.19	0.025			sp|Q9HFE8|TRA1_SCHPO	Transcription-associated protein 1 OS=Schizosaccharomyces
TRINITY_DN27761_c0_g1_i1	0.232	2.055	3.336	1.066	0.241	0.143	1.416	0.088	0.246	4.191	0.805	17.328	2.507	8.429	2.614	1.667	12.822	6.642	8.322	0.471	CDS82437.1|GH47		sp|A1CP08|MNS1B_ASPCL	Probable mannosyl-oligosaccharide alpha-1,2-mannosidase
TRINITY_DN27762_c0_g1_i3	0.19	1.932	2.066	0.397	0.438	0	1.937	0.105	0.188	4.089	1.778	14.504	1.14	11.295	3.246	1	11.764	5.633	4.972	0.149			sp|Q5ATG5|APDG_EMENI	Acyl-CoA dehydrogenase apdG OS=Emericella
TRINITY_DN27767_c0_g1_i5	0	0	0.167	0.136	0	0	0	0.07	0	0.526	0	2.704	0.269	1.72	0.622	0.181	2.037	1.184	1.008	0			sp|P53849|GIS2_YEAST	Zinc finger protein GIS2 OS=Saccharomyces
TRINITY_DN27769_c0_g1_i3	0.041	0.856	0.519	0.281	0.131	0	0.246	0.053	0.049	1.043	0.23	2.714	0.508	2.571	0.096	0.208	1.959	1.351	1.296	0.05			sp|Q9UT75|MOD5_SCHPO	tRNA dimethylallyltransferase OS=Schizosaccharomyces
TRINITY_DN27774_c0_g1_i2	0	0	0	0	0	0	0	0	0	0	0.533	0.29	0	1.433	0	0	0.656	0.37	0.23	0
TRINITY_DN27781_c0_g1_i1	0.273	5.742	12.925	1.764	0.876	0.205	4.493	0.686	0.369	15.489	2.52	67.07	5.998	31.794	7.115	3.529	61.974	35.114	43.039	0.409			sp|C8VG90|ACON_EMENI	Aconitate hydratase, mitochondrial OS=Emericella
TRINITY_DN27782_c0_g1_i1	0.05	4.163	4.623	1.046	0.274	0.441	2.271	0.369	0.246	5.723	1.516	22.677	3.17	17.115	2.547	1.264	13.292	10.009	9.637	0.446			sp|Q98SH3|ADRM1_CHICK	Proteasomal ubiquitin receptor ADRM1 OS=Gallus
TRINITY_DN27782_c0_g1_i3	0	0	0	0	0	0	0	0	0	0.175	0	0	0	1.481	0.259	0.708	0.118	0.259	0	0			sp|Q7K2G1|ADRM1_DROME	Proteasomal ubiquitin receptor ADRM1 homolog
TRINITY_DN27790_c0_g1_i2	0	0.37	0.788	0.262	0.088	0	0.629	0.105	0	0.6	0.094	2.073	0.269	2.313	0.776	0.486	5.162	1.573	1.891	0			sp|Q09906|TM184_SCHPO	Transmembrane protein 184 homolog C30D11.06c
TRINITY_DN27798_c0_g1_i1	0	0	0	0	0	0	0.206	0	0	0.452	0.648	1.893	0	1.519	0	0.458	1.871	0.13	0.298	0
TRINITY_DN27798_c0_g1_i3	0.174	0.415	0.426	0.446	0.11	0	0.324	0.053	0.098	0.286	0.167	4.798	0.59	7.339	0.546	0.542	2.116	1.933	1.392	0
TRINITY_DN27799_c0_g1_i1	0	1.279	5.087	1.008	0.657	0.051	1.691	0.22	0.057	6.323	0.356	18.06	3.201	5.399	2.557	0.583	13.214	9.232	9.07	0.62		Serine_Peptidases	sp|Q9NVX2|NLE1_HUMAN	Notchless protein homolog 1 OS=Homo sapiens
TRINITY_DN2780_c0_g1_i1	0.05	0.856	1.13	0.291	0.033	0.051	0.452	0.062	0.057	1.92	0.324	5.84	0.891	4.644	1.159	0.834	3.507	2.71	1.661	0			sp|Q1MTR4|CTI6_SCHPO	Putative histone deacetylase complex subunit
TRINITY_DN27815_c0_g1_i2	0	0.062	0	0	0	0	0	0	0	0.212	0	0.28	0.155	0	0.565	0	0	1.184	0.624	0					TraesCS6B02G346600.1	cds chromosome:IWGSC:6B:610804613:610807774:1
TRINITY_DN27834_c0_g1_i1	0	0.485	0.843	0.271	0.088	0.061	0.61	0.018	0.041	0.923	0.251	5.138	0.487	2.494	0.651	0.125	3.565	2.128	2.793	0.112			sp|P41411|CDC18_SCHPO	Cell division control protein 18 OS=Schizosaccharomyces
TRINITY_DN27836_c0_g1_i4	0	0.123	0.241	0.145	0	0.102	0.206	0.062	0	0	0.157	1.813	0.218	1.539	0.192	0.764	1.087	0.352	0.173	0
TRINITY_DN27842_c0_g2_i1	0.075	0	0	0.145	0	0	0.049	0	0	0.046	0	1.733	0.28	0.487	0.086	0.181	0.901	0.352	0.058	0
TRINITY_DN27843_c0_g3_i3	0.431	6.139	6.532	0.64	0.055	0	1.603	0.114	0.262	5.077	2.165	25.252	2.683	29.213	4.262	2.014	14.84	7.372	9.128	0.298			sp|C8VRV0|PLMT_EMENI	Phosphatidyl-N-methylethanolamine N-methyltransferase
TRINITY_DN27847_c0_g1_i6	0	0	0	0	0	0	0	0	0	0.905	0	0	0	0.851	0.402	0	0.901	1.147	0	0
TRINITY_DN27848_c0_g1_i2	0	0	1.112	0.242	0.033	0.061	0.698	0	0.238	2.308	1.485	18.551	0.394	12.624	0.393	2.653	16.24	6.161	5.941	0.136
TRINITY_DN27849_c0_g1_i3	0	0	0	0	0	0	0	0	0	0.305	0	1.172	0	0.898	0.153	0	1.44	1.018	0.106	0
TRINITY_DN27859_c0_g1_i1	0	0	0	0.107	0.11	0	0	0	0	0.406	0	1.112	0	0.363	0.402	0	3.34	1.314	0.998	0			sp|Q966L5|SRRT_CAEEL	Serrate RNA effector molecule homolog OS=Caenorhabditis
TRINITY_DN27859_c0_g1_i3	0	0.856	1.297	0.407	0.022	0.02	0.787	0.062	0.074	1.495	0.45	8.244	0.736	5.342	0.938	0.611	4.741	2.692	4.3	0			sp|Q966L5|SRRT_CAEEL	Serrate RNA effector molecule homolog OS=Caenorhabditis
TRINITY_DN27861_c0_g1_i3	0	3.467	5.087	1.24	0.329	0.113	1.819	0.246	0.246	5.16	0.837	15.495	5.2	12.404	2.634	1.764	8.247	7.724	7.372	0.434			sp|Q149F1|RUSD2_MOUSE	RNA pseudouridylate synthase domain-containing
TRINITY_DN27864_c0_g1_i3	0.298	0.273	0.936	1.182	0.099	0	0.747	0.097	0.09	1.542	1.569	8.814	1.119	8.534	0.364	0	5.74	4.227	2.064	0
TRINITY_DN27873_c0_g1_i2	0	1.482	1.668	0.543	0.142	0	1.278	0.035	0.246	2.28	0.742	11.158	0.787	13.904	1.743	1.417	7.278	3.885	4.06	0			sp|Q8BWT1|THIM_MOUSE	3-ketoacyl-CoA thiolase, mitochondrial OS=Mus
TRINITY_DN27874_c0_g2_i1	0	0.45	0.352	0	0	0	0.737	0	0.09	0.194	0.596	6.591	0.383	1.338	0	0.764	8.424	2.22	1.421	0
TRINITY_DN27879_c0_g1_i2	0.033	0	0	0.068	0	0	0	0.018	0.016	0.378	0	1.553	0	1.328	0.22	0.125	0.921	0.315	0	0			sp|Q92462|PUB1_SCHPO	E3 ubiquitin-protein ligase pub1 OS=Schizosaccharomyces
TRINITY_DN27882_c0_g1_i2	0	1.023	1.779	0.349	0.208	0.082	0.826	0.097	0.139	3.314	0.397	9.926	1.336	2.035	1.571	0.5	7.572	5.014	4.866	0.223			sp|Q9C102|GLT1_SCHPO	Putative glutamate synthase [NADPH] OS=Schizosaccharomyces
TRINITY_DN27919_c0_g3_i1	0	0.529	1.427	0.339	0.219	0.031	0.433	0.079	0.057	2.465	0.105	8.394	0.622	2.074	1.082	0.292	6.2	3.746	3.446	0.037			sp|P0CQ91|MAK5_CRYNB	ATP-dependent RNA helicase MAK5 OS=Cryptococcus
TRINITY_DN27924_c0_g1_i5	0.075	0.82	0.528	0.523	0.055	0.082	0	0.149	0.164	1.542	0.805	5.349	1.191	9.719	0	0.82	3.918	1.758	4.319	0.136			sp|P0CS47|PFS2_CRYNB	Polyadenylation factor subunit 2 OS=Cryptococcus
TRINITY_DN27926_c0_g1_i1	0	1.429	0.593	0.194	0	0.072	0.098	0	0	1.44	0.324	4.087	0.818	3.22	0.469	0.181	2.743	1.526	2.275	0.236
TRINITY_DN27927_c0_g1_i1	0.017	0	0.139	0.019	0.011	0	0.118	0.009	0.008	0.314	0.01	0.952	0.062	0.22	0.077	0	1.557	0.657	0.096	0			sp|Q7LKZ7|BPH1_SCHPO	Beige protein homolog 1 OS=Schizosaccharomyces
TRINITY_DN27929_c0_g1_i1	0	0	0	0	0.099	0	0.069	0	0	0.055	0	0.992	0.062	0.535	0	0	0.411	0.204	0.24	0.05			sp|D4ANV2|PLB1_ARTBC	Lysophospholipase ARB_05919 OS=Arthroderma
TRINITY_DN27934_c0_g1_i1	0.29	1.544	1.881	0.339	0.131	0.307	0.551	0.062	0	2.428	0.941	7.813	2.673	7.989	0.613	1.139	5.172	1.952	2.39	0			sp|Q9P6Q1|PLPHP_SCHPO	Pyridoxal phosphate homeostasis protein
TRINITY_DN27934_c0_g1_i2	0	0	0	0.194	0	0	0	0	0	0	0	1.723	0.145	0.612	0.479	0	0.676	0.907	0.509	0			sp|Q9P6Q1|PLPHP_SCHPO	Pyridoxal phosphate homeostasis protein
TRINITY_DN27935_c0_g1_i3	0	0.141	0	0	0	0	0	0	0	0.434	0.146	0.581	0.135	0.535	0.527	0.306	0.617	0.74	0.47	0.062
TRINITY_DN27935_c0_g1_i4	0	0.909	0.704	0.203	0	0.533	0.728	0.369	0	2.511	0.544	10.848	1.409	3.842	1.101	0	12.077	6.531	6.172	0
TRINITY_DN27940_c0_g1_i1	0	0	0	0	0	0	0	0	0	0.185	0	3.085	0.487	0.898	0.431	0	0.509	0.222	0.614	0			sp|O14241|ARPC2_SCHPO	Actin-related protein 2/3 complex subunit
TRINITY_DN27940_c0_g1_i2	0	4.455	4.355	1.453	0.493	0.143	2.723	0.193	0.377	6.6	2.918	28.767	3.719	25.534	2.634	1.931	18.963	9.676	13.639	0			sp|O14241|ARPC2_SCHPO	Actin-related protein 2/3 complex subunit
TRINITY_DN27942_c0_g1_i3	0	1.747	0.973	0.523	0	0	0.442	0.158	0	4.708	1.767	31.201	0	4.53	3.093	0	30.424	4.292	9.186	0			sp|Q05659|BAR2_SCHCO	Pheromone B alpha 2 receptor OS=Schizophyllum
TRINITY_DN27943_c0_g1_i2	0	0.97	2.011	0	0.252	0	0.934	0.211	0	2.945	0.857	16.447	1.14	6.03	1.858	0.528	11.402	5.596	5.039	0
TRINITY_DN27947_c0_g1_i1	0.041	0.194	0.25	0.029	0	0	0.059	0	0.115	0.249	0.282	3.636	0.083	4.711	0.326	0.306	4.183	1.11	1.219	0			sp|O94447|SLM1_SCHPO	Cytoskeletal signaling protein slm1 OS=Schizosaccharomyces
TRINITY_DN27951_c0_g1_i1	0	0	0	0.078	0	0	0	0	0	0	0.209	0.451	0.311	0	0.115	0.333	0	0.324	0.768	0			sp|Q10276|KICH_SCHPO	Putative choline kinase OS=Schizosaccharomyces
TRINITY_DN27951_c0_g1_i3	0	1.685	1.909	0.446	0.186	0.143	0.806	0.114	0.328	2.178	0.303	10.297	0.87	7.913	1.561	1.236	8.404	3.515	4.194	0.174			sp|Q10276|KICH_SCHPO	Putative choline kinase OS=Schizosaccharomyces
TRINITY_DN27953_c0_g1_i3	0	0	0	0	0	0	0	0	0	0	0	0.811	0	0.736	0.172	0	0.5	0.944	0.336	0			sp|P0CT29|YU204_USTMA	Uncharacterized hydrolase UM10204 OS=Ustilago
TRINITY_DN27960_c0_g1_i1	0	0.141	0.065	0	0	0	0.157	0	0	0.148	0.178	0.831	0.031	1.558	0.096	0.194	0.94	0.379	0.461	0
TRINITY_DN27961_c0_g1_i1	0	0.917	1.167	0.591	0	0.164	1.317	0.167	0.246	2.142	0.711	12.491	1.689	10.636	1.685	0.556	6.063	5.374	6.441	0.298			sp|Q6IR75|CSN2_XENLA	COP9 signalosome complex subunit 2 (Fragment)
TRINITY_DN27966_c0_g1_i2	0.646	0.785	1.01	0.184	0.099	0	0.236	0.185	0.82	0.148	0	0	0	0.029	0	0.097	0.147	0	0	0
TRINITY_DN2796_c0_g1_i1	0.19	1.923	2.094	0.339	0.033	0.143	0.895	0.088	0.115	3.175	1.286	9.826	2.258	6.498	1.743	0.986	6.465	4.56	4.022	0.273			sp|Q6CWQ8|PUS1_KLULA	tRNA pseudouridine synthase 1 OS=Kluyveromyces
TRINITY_DN27970_c0_g1_i2	0	0.591	1.955	0	0	0	2.399	0	0.033	3.905	1.799	21.656	0.238	10.913	0.622	0.639	54.578	12.09	9.55	0			sp|A0A146F0J0|PEPA_ASPPE	Aspergillopepsin-1 OS=Aspergillus pseudoglaucus
TRINITY_DN27974_c0_g1_i4	0.166	2.417	6.217	0.717	0.329	0.297	2.33	0.211	0.074	5.631	0.837	23.218	5.356	12.844	3.17	2.028	12.175	8.529	10.347	0			sp|P0CO10|CLF1_CRYNJ	Pre-mRNA-splicing factor CLF1 OS=Cryptococcus
TRINITY_DN27976_c0_g1_i1	0	0	0.093	0	0.241	0	0.226	0	0.016	0.535	0.22	2.144	0.259	1.261	0.278	0.194	1.655	0.342	0.288	0.074
TRINITY_DN27981_c0_g1_i2	0.066	0.6	2.733	0.417	0.219	0	0.659	0.07	0	3.295	0.324	10.798	1.916	5.6	1.934	1.417	7.023	3.487	3.225	0.298
TRINITY_DN27983_c0_g1_i2	0.05	0.767	1.371	0.446	0.033	0	1.445	0.062	0.721	1.468	3.043	20.133	0.59	19.313	1.609	1.903	29.248	12.654	5.836	0		Cysteine_Peptidases=ADB60604	sp|P55306|CATA_SCHPO	Catalase OS=Schizosaccharomyces pombe (strain
TRINITY_DN27997_c0_g1_i2	0	0.353	0	0	0	0	0.315	0.097	0.172	0	0.115	3.686	0.186	2.274	0.565	0	0.999	0.805	0.643	0.174
TRINITY_DN28001_c0_g1_i2	0	0.582	0.269	0.3	0.186	0	0.521	0.079	0.074	0.268	0.732	5.429	0.3	7.339	0.661	0.278	0	1.674	1.142	0			sp|Q09830|YAD4_SCHPO	TBC domain-containing protein C4G8.04 OS=Schizosaccharomyces
TRINITY_DN28001_c0_g1_i3	0	0.035	0.204	0.068	0.011	0	0	0	0	0.489	0.031	2.404	0.073	0.765	0.115	0.208	3.624	0.842	0.614	0			sp|Q09830|YAD4_SCHPO	TBC domain-containing protein C4G8.04 OS=Schizosaccharomyces
TRINITY_DN28002_c0_g1_i1	0	0	0	0	0	0	0.216	0	0	0.637	0.701	5.739	0	4.625	0.163	0	2.312	1.748	1.104	0			sp|Q47317|IUCB_ECOLX	N(6)-hydroxylysine O-acetyltransferase OS=Escherichia
TRINITY_DN28007_c0_g1_i2	0.099	0.247	0.324	0.068	0	0	0.069	0	0.057	0.323	0.408	0.932	0	2.131	0.134	0	1.195	0.629	0.336	0.112
TRINITY_DN28007_c0_g4_i1	0.066	1.385	2.946	0.765	0.635	0.266	1.917	0.079	0.229	4.44	1.014	14.834	1.896	9.422	2.059	1.07	14.232	5.717	3.628	0
TRINITY_DN28010_c0_g1_i1	0	0	0.093	0.136	0	0	0.226	0	0	0	0	3.796	0	0.745	0.249	0.57	2.87	1.156	0.998	0			sp|O00107|PHYA_THIHE	3-phytase A OS=Thielavia heterothallica
TRINITY_DN28010_c0_g1_i6	0	0	0	0	0	0	0	0.026	0	0	0.544	0.491	0	2.609	0.115	0.333	0.088	0.453	0	0			sp|O00093|PHYB_EMENI	3-phytase B OS=Emericella nidulans (strain
TRINITY_DN28018_c0_g1_i4	0.075	0.767	0.435	0.126	0	0	0.246	0.132	0	0.563	0.314	6.15	0.238	5.934	0.622	0	3.938	1.304	2.4	0
TRINITY_DN28019_c0_g1_i1	0	0	0	0	0	0	0	0	0	0	0.125	0.521	0.145	0.956	0	0	0.686	0.463	0.259	0	CAK96951.1|GH2|3.2.1.25		sp|A1DMT2|MANBA_NEOFI	Beta-mannosidase A OS=Neosartorya fischeri
TRINITY_DN28019_c0_g1_i2	0	0	0.028	0	0	0	0.02	0	0	0.148	0	1.132	0	0.182	0	0	1.136	0.093	0.269	0	CAK96951.1|GH2|3.2.1.25		sp|Q0CI48|MANBA_ASPTN	Beta-mannosidase A OS=Aspergillus terreus
TRINITY_DN28019_c0_g1_i3	0	0.353	0.361	0	0	0	0	0	0.115	0.905	0.889	3.977	0	4.625	0.306	0	0.774	0.49	0.586	0			sp|Q0CI48|MANBA_ASPTN	Beta-mannosidase A OS=Aspergillus terreus
TRINITY_DN28020_c0_g1_i2	0	0	0.259	0	0	0	0	0	0	0	0.387	0.761	0	2.752	0.144	0.528	2.498	1.138	1.449	0			sp|Q09879|UBP5_SCHPO	Probable ubiquitin carboxyl-terminal hydrolase
TRINITY_DN28026_c0_g1_i2	0.041	2.54	0.454	0.116	0.175	0	0.511	0.105	0.287	1.708	0.272	6.971	0.611	8.849	1.015	0.222	5.446	2.368	2.102	0			sp|P17549|CP53_ASPNG	Benzoate 4-monooxygenase OS=Aspergillus
TRINITY_DN28042_c0_g1_i6	0.017	0.37	0.389	0.184	0.055	0	0	0.035	0.033	0.342	0.314	3.225	0.249	2.876	0.594	0.264	0.813	0.888	0.95	0.025	CDR38041.1|GT2		sp|J9VXM5|CHS3_CRYNH	Chitin synthase 3 OS=Cryptococcus neoformans
TRINITY_DN28049_c0_g1_i1	0	0.732	0.593	0.174	0	0	0.413	0.018	0.09	1.062	0.586	6.28	0.508	3.67	0.508	0.57	2.292	1.526	1.757	0
TRINITY_DN2807_c0_g1_i1	0.199	0.591	1.492	1.463	0.263	0.102	1.032	0	0.115	0.12	1.412	6.921	0.549	9.413	1.446	2.709	7.944	1.277	1.92	0.223
TRINITY_DN2807_c0_g1_i2	0	0	0	0	0	0	0	0	0	0	0.209	0.521	0	0.831	0.211	0.625	0.519	0.537	0.633	0
TRINITY_DN28097_c0_g2_i2	0	1.076	0.445	0.116	0.153	0	0.364	0.035	0.164	0.905	0.847	6.03	1.057	6.957	0.488	0.222	4.437	1.896	2.016	0.198
TRINITY_DN28100_c0_g1_i2	0	0	0	0	0	0	0	0	0	0.212	0	1.863	0.311	0.162	0	0.125	0.255	0.185	0.23	0			sp|O94289|LUB1_SCHPO	Ubiquitin homeostasis protein lub1 OS=Schizosaccharomyces
TRINITY_DN28100_c0_g1_i3	0	0	0	0.097	0	0	0	0.158	0.082	0.378	0.397	2.925	0.559	1.433	0	0.986	0	0.527	0	0			sp|P54319|PLAP_RAT	Phospholipase A-2-activating protein OS=Rattus
TRINITY_DN28101_c0_g1_i3	0.116	1.279	1.899	0.455	0.153	0.061	0.954	0.079	0.107	3.138	0.983	11.018	1.419	5.992	1.609	0	8.365	3.349	5.941	0.198			sp|Q4VBI7|STX18_DANRE	Syntaxin-18 OS=Danio rerio GN=stx18 PE=2
TRINITY_DN28107_c0_g1_i2	0.091	1.544	3.011	0.62	0	0.215	1.17	0.149	0	4.791	1.14	10.617	1.544	8.964	2.155	0.972	9.462	5.939	5.749	0.484
TRINITY_DN28109_c0_g1_i1	0	0.123	0.259	0.165	0	0.041	0.226	0	0.025	0.729	0.387	1.472	0.466	1.003	0.249	0.111	0.578	0.481	0.691	0
TRINITY_DN28115_c0_g1_i1	0	0	0.176	0	0	0	0.197	0	0	0.351	0	2.244	0.135	1.003	0.345	0.181	0.891	0.546	0.269	0
TRINITY_DN28119_c0_g1_i1	0	0.494	1.242	0	0	0	0.344	0	0	0.674	0.91	10.187	0	15.94	0.517	1.167	5.671	1.027	2.428	0
TRINITY_DN28119_c0_g1_i3	0	0	0	0	0	0	0	0	0.197	0.102	0	2.785	0.404	2.007	0	0	3.84	1.508	0.624	0
TRINITY_DN28136_c0_g1_i1	0	0	0.083	0	0	0	0	0	0	0.111	0	0.671	0.176	0.382	0	0.389	1.156	0.12	0.797	0			sp|O13773|UCP7_SCHPO	UBA domain-containing protein 7 OS=Schizosaccharomyces
TRINITY_DN28136_c0_g1_i2	0.033	0.485	0.352	0.233	0.044	0	0.236	0.018	0.098	1.043	0.45	3.255	0.487	2.838	0.402	0	1.626	1.434	1.497	0.074			sp|O13773|UCP7_SCHPO	UBA domain-containing protein 7 OS=Schizosaccharomyces
TRINITY_DN28149_c0_g2_i1	0	0.379	0.296	0.087	0	0	0.442	0	0	0.397	0.199	2.865	0.269	1.969	0.077	0.486	1.185	0.527	1.19	0
TRINITY_DN28152_c0_g1_i2	0	0	0.074	0.097	0	0.092	0	0	0	0	0.073	1.382	0.342	0.315	0	0.597	0.598	1.304	1.2	0
TRINITY_DN28155_c0_g1_i3	0	0	0	0	0	0	0.305	0	0	0.665	0.115	0.421	0.321	0	0.814	0.57	0.568	1.351	0.48	0.186
TRINITY_DN28158_c0_g1_i3	0.265	9.35	14.121	4.36	1.358	0.277	6.646	0.519	0.713	15.249	3.838	52.787	9.064	44.255	10.773	4.265	29.258	21.192	30.897	1.215
TRINITY_DN28159_c0_g1_i1	0	0.088	0.612	0	0.318	0	0.275	0	0.09	1.966	0	4.938	0.59	0.87	1.044	0	9.442	2.655	2.217	0.174			sp|P14068|XPO1_SCHPO	Exportin-1 OS=Schizosaccharomyces pombe
TRINITY_DN28163_c0_g1_i3	0.108	6.316	7.468	1.492	0.515	0.225	2.969	0.281	0.525	6.406	1.84	26.043	5.625	23.766	4.568	3.57	11.666	8.261	7.439	0.633			sp|O59772|SWS2_SCHPO	37S ribosomal protein subunit sws2, mitochondrial
TRINITY_DN28172_c0_g1_i1	0.083	2.126	1.297	0.523	0.23	0.174	0.875	0.167	0.205	2.511	0.617	10.367	1.771	8.773	1.973	0.458	6.543	3.839	4.022	0.186			sp|P12688|YPK1_YEAST	Serine/threonine-protein kinase YPK1 OS=Saccharomyces
TRINITY_DN28172_c0_g1_i3	0	0	0.074	0	0	0	0.059	0	0	0.185	0	0.22	0.041	0.363	0	0	0.921	0.768	0.825	0			sp|P12688|YPK1_YEAST	Serine/threonine-protein kinase YPK1 OS=Saccharomyces
TRINITY_DN28173_c0_g1_i2	0	0	0	0.465	0.044	0	0	0.035	0	0.831	0	3.135	0.694	0.44	0.824	0.333	2.752	0.907	0.902	0.062
TRINITY_DN28173_c0_g1_i3	0	0.353	0	0.339	0.066	0.113	0.58	0.062	0.156	0.692	0	7.302	0.145	6.03	0.508	0.097	2.537	1.785	3.11	0
TRINITY_DN28174_c0_g1_i2	0	0	0	0	0	0	0	0	0	0	0.241	2.594	0	1.491	0.326	0.125	0.98	0.111	0	0
TRINITY_DN28175_c0_g1_i1	0	0.838	0	0.242	0.022	0	0.364	0.079	0.074	0.895	0.69	5.509	0.549	4.778	0.546	0.486	2.929	2.202	1.709	0.174
TRINITY_DN28175_c0_g3_i2	0.075	1.544	1.288	0.3	0.12	0.113	0.855	0.07	0.131	2.64	0.941	10.197	1.616	7.616	1.494	0.417	7.768	3.996	3.868	0.211			sp|Q9P7Q4|SEC18_SCHPO	Vesicular-fusion protein sec18 OS=Schizosaccharomyces
TRINITY_DN28175_c0_g4_i1	0.083	1.711	1.297	0.252	0.055	0	0.482	0.053	0.098	1.338	0.45	5.519	0.995	3.087	1.101	0.889	3.742	1.656	2.928	0.236			sp|Q9VK34|SIR2_DROME	NAD-dependent histone deacetylase Sir2 OS=Drosophila
TRINITY_DN28177_c0_g1_i1	0	0.097	0	0	0	0	0.167	0.018	0.041	0.129	0.261	3.676	0.031	2.437	0.019	0.431	3.183	0.685	0.864	0.074
TRINITY_DN28178_c0_g1_i1	0	1.994	4.438	1.124	0.142	0.215	1.445	0.193	0.303	3.065	1.15	22.006	1.761	14.841	2.116	1.875	16.662	10.064	10.539	0.124			sp|P38356|BSD2_YEAST	Metal homeostatis protein BSD2 OS=Saccharomyces
TRINITY_DN28180_c0_g1_i3	0	0	0.148	0	0	0	0.236	0	0	0.102	0.094	1.362	0.29	1.013	0.105	0	0.911	0.555	0.384	0			sp|Q4P2U6|ATG8_USTMA	Autophagy-related protein 8 OS=Ustilago
TRINITY_DN28180_c0_g1_i4	0.422	13.478	26.731	4.854	2.092	0.441	9.291	1.09	0.762	24.978	6.368	132.237	13.923	83.636	16.347	7.015	95.502	52.616	57.235	2.046			sp|P87068|ATG8_LACBI	Autophagy-related protein 8 OS=Laccaria
TRINITY_DN28183_c0_g2_i1	0.058	0.141	0.232	0	0	0	0.079	0	0	0.111	0.094	1.763	0.228	1.08	0.192	0.083	0.598	0.463	0.202	0
TRINITY_DN28197_c0_g1_i3	0	0	0.111	0.203	0.186	0.051	0.728	0	0	1.154	0.282	1.813	0	1.682	0.986	0.361	2.576	1.573	0.873	0.112
TRINITY_DN28197_c0_g2_i1	0	0	0	0	0	0	0	0	0	0.249	0	1.412	0.238	1.061	0.287	0	0.519	0	0.288	0
TRINITY_DN28197_c0_g2_i2	0.099	1.826	1.066	0.61	0.099	0.102	0.787	0.062	0.033	1.735	0.575	6.881	0.86	4.09	0.709	0.403	3.957	2.35	1.958	0.124
TRINITY_DN28198_c0_g1_i1	0	0.15	0.519	0.145	0.12	0	0	0	0	1.468	0	4.197	0.383	1.768	0.259	0	0.784	1.064	2.217	0			sp|P0CT74|RS11B_SCHPO	40S ribosomal protein S11-B OS=Schizosaccharomyces
TRINITY_DN28198_c0_g1_i4	2.402	122.742	164.258	36.074	14.227	4.539	58.343	6.468	4.196	180.109	30.388	602.391	149.3	360.118	85.709	47.746	244.78	199.871	286.454	13.866			sp|P0CT74|RS11B_SCHPO	40S ribosomal protein S11-B OS=Schizosaccharomyces
TRINITY_DN28201_c0_g1_i2	0	0.75	1.205	0.455	0.11	0	0.226	0.141	0.066	1.117	0.387	6.901	0.238	3.631	0.584	0.278	2.988	2.285	1.565	0.248			sp|O60066|ALKBH_SCHPO	Alpha-ketoglutarate-dependent dioxygenase
TRINITY_DN28210_c0_g1_i1	0	6.333	0.964	0	0.274	0	0.433	0	0.606	1.052	1.307	6.08	1.222	12.031	0.393	0.514	0.901	0.722	1.814	0
TRINITY_DN28223_c0_g1_i3	0	2.787	2.455	1.008	0.142	0.051	0.944	0.062	0.156	3.572	0.732	12.831	2.59	8.333	1.781	2.403	5.005	4.181	4.828	0.36			sp|Q9C5J3|RRC1_ARATH	Protein RRC1 OS=Arabidopsis thaliana GN=RRC1
TRINITY_DN28246_c0_g1_i4	0	0	0.473	0	0	0	0	0	0	1.56	0	4.868	1.45	0	0.757	0	2.752	0.888	2.14	0			sp|Q29RY4|RNZ1_BOVIN	Zinc phosphodiesterase ELAC protein 1 OS=Bos
TRINITY_DN28246_c0_g1_i5	0	0	0	0	0.208	0	0	0.044	0	0.489	0.251	1.282	0	4.1	0.584	1.07	0	0.731	1.737	0			sp|A7MHT9|RBN_CROS8	Ribonuclease BN OS=Cronobacter sakazakii
TRINITY_DN2825_c0_g1_i1	0	0	0	0	0	0	0	0	0	0	0.23	1.032	0	1.615	0.22	0	0.333	0.611	0.845	0
TRINITY_DN28262_c0_g1_i1	0	0.044	0.12	0.262	0	0.195	0.157	0	0.025	0.138	0.418	0.541	0.031	2.236	0.192	0.792	0.656	0.638	0.259	0.05
TRINITY_DN28270_c0_g1_i3	0.472	5.019	7.755	1.172	0.548	0.348	2.812	0.22	0.402	6.766	1.893	23.559	5.138	13.159	2.969	0.903	12.538	8.27	9.291	0.657			sp|Q4P5F9|RU2A_USTMA	U2 small nuclear ribonucleoprotein A' OS=Ustilago
TRINITY_DN28270_c0_g1_i6	0	0	0	0.126	0	0	0	0	0	0.471	0	1.502	0	6.154	0	0.75	0.96	0	0.681	0			sp|Q9BLB6|RU2A_CAEEL	Probable U2 small nuclear ribonucleoprotein
TRINITY_DN28275_c0_g1_i1	0	0.529	0	0.63	0.263	0.102	0.964	0.439	0.057	2.815	0.784	9.846	1.44	7.922	1.494	0	5.231	4.218	4.751	0.335			sp|O14214|TRM10_SCHPO	tRNA (guanine(9)-N1)-methyltransferase
TRINITY_DN28282_c0_g1_i2	0.861	36.871	62.977	11.676	3.702	0.963	24.924	3.507	2.352	69.876	19.053	267.891	36.9	159.542	39.311	22.352	157.77	104.436	114.317	2.245			sp|J9MJK9|TAL1_FUSO4	Transaldolase OS=Fusarium oxysporum f. sp.
TRINITY_DN28291_c0_g2_i3	0.248	1.085	3.122	0.397	0.088	0	1.19	0.167	0.148	1.828	0.805	11.208	2.093	6.785	1.705	1.139	5.015	3.959	3.35	0
TRINITY_DN28313_c0_g2_i2	1.83	66.2	112.279	26.453	9.584	1.803	46.683	5.22	3.68	137.934	23.748	452.274	76.162	249.695	84.598	30.006	317.519	193.322	206.624	5.532			sp|Q4P7J7|H31_USTMA	Histone H3.1 OS=Ustilago maydis (strain 521
TRINITY_DN28327_c0_g1_i1	0	1.279	1.77	0.649	0.34	0.225	1.259	0.114	0	2.751	0.941	9.866	1.896	11.668	1.743	1.486	5.76	3.497	5.02	0.335			sp|O14417|MAD2_SCHPO	Mitotic spindle checkpoint component mad2
TRINITY_DN28332_c0_g2_i4	0	0.115	0.241	0.019	0	0	0.108	0	0.033	0.157	0.241	1.963	0.083	1.739	0.048	0.042	2.214	0.86	0.643	0
TRINITY_DN28410_c0_g1_i1	0	0	1.093	0.213	0	0	0.187	0.044	0	0.812	0.345	3.626	0.694	5.093	0.728	0.722	3.938	1.304	0.422	0			sp|P82476|CDA_CRYNH	Chitin deacetylase OS=Cryptococcus neoformans
TRINITY_DN28411_c0_g1_i4	0	1.614	1.992	0.242	0.449	0	1.416	0.141	0.164	1.265	0.429	8.574	1.813	6.087	2.643	0.903	11.881	6.503	4.732	0			sp|Q9P7L5|OAT_SCHPO	Ornithine aminotransferase car2 OS=Schizosaccharomyces
TRINITY_DN28415_c0_g1_i1	0	0	2.335	0	0	0	6.037	0	0	3.074	6.808	57.725	0	44.188	7.632	1.723	58.399	10.037	15.53	0			sp|Q01358|BLI3_NEUCR	Protein bli-3 OS=Neurospora crassa (strain
TRINITY_DN28416_c0_g1_i1	0	0.079	0	0	0	0	0.098	0	0	0.092	0.22	1.272	0	1.558	0.172	0.528	1.42	0.296	0	0			sp|O93567|ZBT7A_CHICK	Zinc finger and BTB domain-containing protein
TRINITY_DN28420_c0_g1_i1	0.041	0.441	1.501	0.291	0.088	0	0.324	0.053	0.074	0.942	0.335	4.698	0.549	2.074	0.661	0.167	4.947	3.33	3.004	0.099
TRINITY_DN28420_c0_g1_i3	0	0	0	0	0	0	0	0	0	0.36	0	0.3	0	0	0	0	2.929	1.045	0	0
TRINITY_DN28420_c0_g1_i5	0.116	1.279	0.056	0.775	0	0.246	0.305	0	0.393	0.443	1.558	13.222	0.383	13.723	0.948	1.306	0	3.857	6.373	0.819
TRINITY_DN28423_c0_g1_i1	0	0.185	0.12	0	0.307	0	0.551	0.097	0.09	1.098	0.125	3.886	0	1.051	0.699	0.792	3.213	2.331	1.488	0			sp|Q07878|VPS13_YEAST	Vacuolar protein sorting-associated protein
TRINITY_DN28424_c0_g1_i1	0	0.018	0.102	0.068	0	0	0.118	0	0	0.083	0.314	3.906	0.01	3.077	0.23	0.472	4.104	0.971	0.681	0
TRINITY_DN28441_c0_g1_i2	0	0	0.658	0.174	0.12	0	0.256	0.114	0	0.434	0.282	3.436	0.746	3.717	0.383	0.139	3.624	1.166	1.325	0.037
TRINITY_DN28443_c0_g1_i5	0	0.662	0.324	0.203	0	0	0.315	0	0	0.425	0.178	2.724	0.218	4.071	0.441	0.403	1.41	0.833	0.883	0			sp|Q9UTI3|ARD1_SCHPO	N-terminal acetyltransferase A complex catalytic
TRINITY_DN28444_c0_g1_i3	0.331	4.155	4.336	1.114	0.635	0.441	2.183	0.211	0.082	5.557	1.433	23.749	3.823	14.889	2.605	2.153	9.521	6.965	7.679	0.322			sp|E3KAB5|ITPA_PUCGT	Inosine triphosphate pyrophosphatase OS=Puccinia
TRINITY_DN28450_c0_g1_i2	0	0.388	0.667	0.242	0.197	0	0.659	0	0.09	1.717	0	7.833	0.259	1.414	1.168	0.222	9.981	3.561	3.273	0			sp|Q9HE05|UFD2_SCHPO	Ubiquitin conjugation factor E4 OS=Schizosaccharomyces
TRINITY_DN28450_c0_g1_i3	0.075	1.649	2.316	0.746	0	0.154	0.993	0.281	0	2.825	1.401	14.354	1.803	17.507	0.555	1	1.303	4.459	4.953	0.087			sp|Q9HE05|UFD2_SCHPO	Ubiquitin conjugation factor E4 OS=Schizosaccharomyces
TRINITY_DN28451_c0_g1_i1	0.017	0.273	0.408	0.058	0	0.02	0.344	0.009	0.008	0.489	0.094	2.634	0.249	1.491	0.508	0.292	1.479	0.805	0.96	0.062			sp|O60072|MUG81_SCHPO	Putative helicase mug81 OS=Schizosaccharomyces
TRINITY_DN28458_c0_g1_i1	0	0	0.204	0	0.077	0	0	0.07	0	0.415	0.105	0.771	0.114	0.22	0.316	0.167	1.665	0.981	0.777	0
TRINITY_DN28458_c0_g1_i3	0.033	0.935	0.639	0.378	0	0.072	0.167	0	0.082	0.858	0.272	4.547	0.445	3.44	0.642	0.236	1.479	1.97	1.248	0.074
TRINITY_DN28459_c0_g1_i6	0	0	0	0	0	0	0	0	0	0	0	1.092	0	0.201	0	0	0.519	0.093	0.182	0.112			sp|Q54YZ9|DHKJ_DICDI	Hybrid signal transduction histidine kinase
TRINITY_DN28466_c0_g1_i1	0.215	6.73	8.422	1.221	0.329	0.143	2.704	0.246	0.385	8.714	2.165	39.645	6.081	21.836	4.262	2.403	21.686	14.514	19.475	0.608			sp|O13285|IDH1_CANTR	Isocitrate dehydrogenase [NADP], mitochondrial
TRINITY_DN28468_c0_g2_i1	0	4.366	8.765	2.006	0.427	0.625	2.959	0	0.32	7.394	2.395	45.355	4.009	29.003	5.995	3.959	21.961	14.162	15.223	0.707
TRINITY_DN28469_c0_g1_i2	0	0	0	0.223	0	0	0	0	0	0.138	0	0.911	0.352	1.309	0.441	0	1.381	0.398	1.19	0
TRINITY_DN28469_c0_g1_i3	0.05	2.884	3.762	0.048	0.164	0.297	2.497	0.123	0.254	5.741	0.847	26.433	1.699	13.522	3.237	1.695	14.859	9.075	12.286	0.223
TRINITY_DN28474_c0_g1_i1	0	0	0	0	0	0	0	0	0	0	0.084	0.12	0	0.363	0.096	0	0.784	0.49	0.134	0
TRINITY_DN28474_c0_g1_i2	0	0.141	0.241	0.097	0.088	0	0.305	0.018	0.082	0.48	0.303	5.379	0.3	3.335	0.402	0.306	3.908	1.785	1.488	0
TRINITY_DN28477_c0_g1_i2	0	0	0	0	0	0	0.118	0	0	0.092	0.565	0	0	2.857	0	0	1.89	0.823	1.094	0
TRINITY_DN28477_c0_g1_i4	0	0.079	0	0	0	0	0	0	0	0	0	5.96	0	2.848	0.441	0	2.41	0.472	0.605	0
TRINITY_DN28478_c0_g1_i1	0	0.856	1.788	0.775	0	0	1.514	0	0	2.271	0.084	22.437	0.839	10.693	1.302	0.278	14.879	7.326	7.247	0			sp|Q8K3X2|FCL_CRIGR	GDP-L-fucose synthase OS=Cricetulus griseus
TRINITY_DN28481_c0_g1_i4	0	0.864	2.326	0	0	0	0.6	0	0.074	1.265	2.834	30.17	1.067	27.331	0.862	1.889	14.536	6.623	7.861	0			sp|Q91090|PON2_MELGA	Serum paraoxonase/arylesterase 2 OS=Meleagris
TRINITY_DN28482_c0_g1_i3	0	0	0.167	0	0	0	0.767	0	0.09	0.803	0.638	3.135	0.093	3.306	0.335	0.458	2.008	2.562	1.19	0			sp|Q04121|NHX1_YEAST	Endosomal/prevacuolar sodium/hydrogen exchanger
TRINITY_DN28485_c0_g1_i2	0.025	2.108	2.233	0.475	0.099	0.072	0.934	0.141	0.066	2.622	0.533	10.006	1.979	6.164	1.331	0.889	6.073	4.227	4.598	0.074			sp|Q5R6L5|CAND1_PONAB	Cullin-associated NEDD8-dissociated protein
TRINITY_DN28486_c1_g1_i1	0	1.385	0.426	0.233	0.219	0	1.16	0	0	0.951	0.523	6.401	0.497	5.543	2.107	1.473	2.801	2.34	0.912	0.186
TRINITY_DN28487_c0_g1_i2	0	0.706	0.602	0	0.088	0	0.482	0.044	0.082	0.323	0.544	2.704	0.414	5.371	0.306	0.361	3.37	1.018	1.555	0			sp|Q09927|AZET_SCHPO	L-azetidine-2-carboxylic acid acetyltransferase
TRINITY_DN28489_c0_g1_i1	0.447	8.38	11.813	2.267	1.709	0.164	6.194	0.984	0.795	16.421	4.193	71.037	7.117	45.478	10.151	4.876	55.803	30.48	30.321	0.608			sp|D4AVD4|CALX_ARTBC	Calnexin homolog ARB_00147 OS=Arthroderma
TRINITY_DN28498_c0_g1_i3	0.323	2.355	4.698	0.833	0.394	0.205	1.878	0.167	0.197	5.723	1.286	18.43	3.481	15.653	2.624	2.209	12.077	7.946	7.842	0.533			sp|Q9URW6|YIE2_SCHPO	SH3 domain-containing protein PJ696.02 OS=Schizosaccharomyces
TRINITY_DN28501_c0_g1_i1	0.025	0.997	1.01	0.281	0.164	0	0.718	0	0.156	1.56	0.471	7.022	0	7.167	1.322	0.389	7.552	2.979	2.505	0.062			sp|Q68J42|LIPS_PIG	Hormone-sensitive lipase OS=Sus scrofa GN=LIPE
TRINITY_DN28503_c0_g1_i4	0	0.388	0	1.066	0	0.195	0.295	0	0	1.145	1.412	7.713	1.875	0	0	1.917	3.546	0.675	0.758	1.488
TRINITY_DN28506_c0_g1_i1	0	0.45	2.659	0	0	0	0.718	0	0.09	1.874	0.92	32.824	0.228	16.198	1.082	0.639	36.712	11.776	8.504	0			sp|Q6Q870|SIRN_LEPMC	N-methyltransferase sirN OS=Leptosphaeria
TRINITY_DN28506_c0_g1_i2	0	0	1.205	0.078	0	0	0.541	0	0.107	1.015	1.61	14.324	0	6.881	0.833	0	12.822	2.877	5.298	0			sp|Q6Q870|SIRN_LEPMC	N-methyltransferase sirN OS=Leptosphaeria
TRINITY_DN28511_c0_g1_i4	0.19	5.839	8.181	1.676	0.263	0	2.782	0	0.41	9.914	2.206	39.415	7.718	24.789	6.158	2.931	21.167	15.17	17.315	0.335			sp|Q9USP6|CLC1_SCHPO	Clathrin light chain OS=Schizosaccharomyces
TRINITY_DN28517_c0_g1_i4	0	11.044	11.73	3.663	1.106	0.543	7.217	0.422	1.09	17.178	2.489	80.162	10.411	49.817	10.438	5.682	39.847	29.166	35.015	1.439			sp|Q4PBU8|ASF1_USTMA	Histone chaperone ASF1 OS=Ustilago maydis
TRINITY_DN28519_c0_g1_i2	0.041	0	0.899	0.591	0.055	0.092	0.423	0	0	0.434	0.261	4.688	0.114	3.23	0.278	0.556	12.234	1.193	2.467	0.198			sp|Q4WZS3|Y5950_ASPFU	Putative aspergillopepsin A-like aspartic
TRINITY_DN28525_c0_g1_i1	0	2.179	5.179	1.773	0	0.225	1.691	0.202	0.156	8.751	1.318	23.559	7.075	15.491	4.463	2.667	6.563	4.708	11.297	0.657
TRINITY_DN28530_c0_g1_i1	0	0.318	1.325	0.194	0	0	0.374	0.07	0.221	1.135	0.23	5.158	0.497	0.965	0.661	0.333	3.095	1.443	2.083	0
TRINITY_DN28530_c0_g1_i2	0.075	1.27	1.659	0.63	0.153	0	1.475	0.079	0	2.751	0.261	9.456	1.171	4.501	1.934	0.361	6.014	3.959	4.569	0.087
TRINITY_DN28543_c0_g1_i1	0	0	0	0	0.252	0	0.413	0	0	0.194	0.868	3.426	0.798	3.058	0.699	0.528	1.489	0.25	0.509	0
TRINITY_DN28544_c0_g1_i3	0	0	0	0	0	0	0	0	0	0.332	0	1.603	0.528	1.491	0	0	1.117	1.249	0.749	0			sp|Q5RJR2|TWF1_RAT	Twinfilin-1 OS=Rattus norvegicus GN=Twf1 PE=1
TRINITY_DN28550_c0_g1_i1	0	0	0	0.213	0	0.123	0.246	0.079	0	0	0	1.543	1.088	4.033	0	0	2.018	1.055	1.113	0.422
TRINITY_DN28552_c0_g1_i2	0.257	0.917	2.029	0.581	0.383	0	1.249	0.044	0.262	2.169	0.46	7.242	1.761	5.199	1.149	1.236	4.868	4.542	3.129	0.074			sp|Q8CI78|RMND1_MOUSE	Required for meiotic nuclear division protein
TRINITY_DN28554_c0_g1_i1	0	0.635	0.843	0.165	0.044	0	0.413	0.035	0.033	1.292	0.188	2.965	0.559	2.609	0.747	0.222	3.066	1.952	2.179	0.136
TRINITY_DN28556_c0_g1_i4	0.05	1.305	1.825	0.213	0.153	0.051	0.433	0.018	0.107	1.505	0.512	3.836	0.3	4.96	1.312	0.611	5.466	2.211	3.753	0.062			sp|P53692|SMC6_SCHPO	Structural maintenance of chromosomes protein
TRINITY_DN28563_c0_g1_i1	0.182	2.699	4.503	0.843	0	0.184	1.534	0.237	0.057	4.495	1.527	15.085	3.74	10.235	1.676	2.237	6.582	5.948	8.677	0.099			sp|O13903|RRP40_SCHPO	Exosome complex component rrp40 OS=Schizosaccharomyces
TRINITY_DN28566_c0_g1_i4	0	0.079	0	0.058	0	0	0	0	0	0.166	0	0.341	0.052	0.765	0.211	0.236	0.196	0.111	0	0.062			sp|D4B093|A1864_ARTBC	Secreted protein ARB_01864 OS=Arthroderma
TRINITY_DN28566_c0_g1_i5	0.066	3.643	3.345	1.143	0.153	0.461	1.524	0.149	0.385	3.037	1.799	14.704	3.201	14.325	1.494	1.695	6.69	4.2	5.318	0.174			sp|D4B093|A1864_ARTBC	Secreted protein ARB_01864 OS=Arthroderma
TRINITY_DN28570_c0_g1_i3	0	0.168	1.232	0.262	0	0.031	0.305	0	0	1.422	0.471	7.012	0.404	1.539	0.661	0.486	3.37	1.85	2.073	0			sp|Q9FME8|OPT4_ARATH	Oligopeptide transporter 4 OS=Arabidopsis
TRINITY_DN28578_c0_g1_i2	0	2.32	2.418	0.281	0.077	0.092	0.826	0.088	0.131	2.077	1.171	12.481	0.995	7.999	2.193	0.625	8.473	4.2	5.03	0.099			sp|Q9V3J8|WDS_DROME	Protein will die slowly OS=Drosophila melanogaster
TRINITY_DN28582_c0_g1_i2	0	5.919	6.597	1.463	0.898	0.256	2.999	0.308	0.107	9.812	1.265	35.659	6.35	19.543	6.244	2.209	11.656	11.341	15.204	0.695			sp|Q4KM49|SYYC_RAT	Tyrosine--tRNA ligase, cytoplasmic OS=Rattus
TRINITY_DN28582_c0_g2_i1	0	0.979	1.89	0.329	0.263	0.031	0.806	0.079	0.049	3.018	0.209	10.147	1.15	1.768	1.207	0.375	6.768	4.153	4.367	0.062			sp|Q9P7X8|RPA2_SCHPO	Probable DNA-directed RNA polymerase I subunit
TRINITY_DN28585_c0_g1_i1	0	0	0	0	0	0	0	0	0	0	0	1.412	0	1.214	0	0	0.382	0.759	0.422	0
TRINITY_DN28585_c0_g1_i2	0.091	1.376	2.122	0.727	0.219	0.051	0.649	0.132	0.164	1.902	0.941	9.385	1.409	9.633	2.126	0.611	6.837	3.127	3.926	0.037
TRINITY_DN28589_c0_g1_i2	0	1.208	0.788	0.155	0.11	0.031	0.521	0.018	0.123	0.942	1.119	9.245	0	11.276	0.67	0.667	2.41	1.906	3.206	0
TRINITY_DN28593_c0_g1_i1	0	3.343	2.122	0.533	0.274	0	0.964	0.36	0.148	3.157	0.784	9.315	1.554	9.508	2.346	1.861	7.728	4.329	2.975	0.136			sp|Q6DHC1|RB18B_DANRE	Ras-related protein Rab-18-B OS=Danio rerio
TRINITY_DN28596_c0_g2_i2	0	0.273	0.519	0.174	0.131	0.051	0	0	0.033	0.785	0.115	3.015	0.963	1.539	0.479	0.194	1.156	0.934	0.95	0
TRINITY_DN28602_c0_g1_i1	0	0.318	0.621	0.029	0	0	0.393	0	0.025	0.84	0.512	9.285	0.114	5.466	0.488	0.389	9.1	3.423	2.256	0			sp|Q09913|ALLC_SCHPO	Probable allantoicase OS=Schizosaccharomyces
TRINITY_DN28604_c0_g1_i7	0.025	0	0.769	0.262	0	0	0.423	0	0.066	1.062	0.366	3.866	0.186	4.138	0.757	0.264	0.656	1.351	1.44	0.062			sp|Q54S77|VPS15_DICDI	Probable serine/threonine-protein kinase
TRINITY_DN28606_c0_g1_i4	1.979	121.542	153.019	33.662	6.999	5.708	43.399	3.709	4.54	141.275	36.119	488.373	137.355	425.138	71.201	60.36	178.712	162.435	279.812	11.795			sp|O74173|EF1B_SCHPO	Elongation factor 1-beta OS=Schizosaccharomyces
TRINITY_DN28607_c0_g1_i3	0	0	0	0	0	0	0	0	0	1.735	0.502	4.227	0	0	1.015	0.861	2.38	1.563	1.881	0			sp|Q4R180|ORC3_RAT	Origin recognition complex subunit 3 OS=Rattus
TRINITY_DN28610_c0_g1_i3	0.19	4.208	7.598	1.686	0.482	0.318	3.323	0.334	0.615	10.56	4.34	46.146	5.853	41.025	5.468	5.848	22.059	14.301	16.432	0.707			sp|Q8X0J4|CYB5L_NEUCR	Putative cytochrome b5 B11H24.095 OS=Neurospora
TRINITY_DN28615_c0_g1_i3	0	3.996	5.93	1.26	0.548	0.451	2.094	0	0.336	6.831	1.098	20.704	6.381	9.508	3.744	1.584	11.989	10.536	11.019	0.546			sp|O43049|PPT1_SCHPO	Serine/threonine-protein phosphatase T OS=Schizosaccharomyces
TRINITY_DN28615_c0_g1_i4	0	0	0	0	0	0	0	0	0	0.748	0	0.28	0.684	0.373	0	0	0.206	0	0.643	0			sp|O43049|PPT1_SCHPO	Serine/threonine-protein phosphatase T OS=Schizosaccharomyces
TRINITY_DN28623_c0_g2_i1	0.108	0.732	1.177	0.359	0.055	0	0.433	0.035	0.082	1.098	0.125	5.749	0.414	4.167	0.929	0.389	4.467	2.59	1.574	0.062			sp|Q2HEW5|CHG2_CHAGB	PKS-NRPS hybrid synthetase CHGG_01239 OS=Chaetomium
TRINITY_DN28624_c0_g1_i1	0	0.326	0.741	0.233	0.088	0.031	0.472	0	0.066	0.342	0.199	2.845	0.839	1.854	0.804	0.347	2.419	0.953	1.449	0.062			sp|Q5F3R2|KDM5B_CHICK	Lysine-specific demethylase 5B OS=Gallus
TRINITY_DN28624_c0_g1_i2	0	0	0	0	0	0	0	0	0	0.618	0.272	0	0	0.736	0	0	0.47	0.361	0	0			sp|Q5F3R2|KDM5B_CHICK	Lysine-specific demethylase 5B OS=Gallus
TRINITY_DN28626_c0_g1_i1	0	0	0.287	0	0	0	0	0	0	0.6	0	7.392	0	4.071	0	0	4.633	1.212	2.016	0
TRINITY_DN28626_c0_g1_i5	0.298	7.357	2.353	1.473	0.099	0	2.173	0.246	1.188	3.166	5.03	47.057	0.818	90.985	1.178	4.876	4.623	5.458	9.598	0
TRINITY_DN28626_c0_g1_i6	0	0	0.713	0	0	0	0.088	0	0.131	0.868	0	4.017	0.86	3.564	2.308	1.431	10.735	1.526	2.428	0.322
TRINITY_DN28626_c0_g1_i7	0	0.476	0	0.145	0	0	0.816	0.132	0	1.449	0.167	9.055	0.549	5.724	1.504	0	14.702	4.264	3.446	0
TRINITY_DN28628_c0_g1_i4	0.124	1.279	0.547	0.446	0	0.02	0.59	0.097	0.074	1.412	0.439	7.913	1.212	4.587	0.795	0.667	3.801	2.377	1.92	0.112			sp|Q09809|CSC1_SCHPO	Calcium permeable stress-gated cation channel
TRINITY_DN28635_c0_g1_i2	0	0	0	0	0	0	0	0	0	0.277	0	1.192	0	0.354	0.067	0	0.735	0.148	0.259	0
TRINITY_DN28635_c0_g1_i6	0	0	0	0	0	0	0	0	0	0.36	0	0.691	0	0.01	0.402	0	0.676	0.222	0.633	0
[truncated: 6,822 more rows]

## Sheet: Table-S3_RefTransAnnotation
Trans	baseMean	log2FoldChange	pvalue	padj	hitName
TraesCS2B02G612100.1	54.7846	-24.0963	3.56527e-26	1.51681e-21	Traes_2AL_40C13C199.1
MSTRG.78990.1	115.357	-25.1287	5.27561e-26	1.60543e-21	Traes_7AS_5369DA7D5.2
TraesCSU02G100600.1	48.5737	-23.9287	1.47706e-25	3.36462e-21	Traes_7BL_2F2F29544.1
MSTRG.78989.3	105.226	-25.0073	2.09369e-25	3.64078e-21	Traes_7AS_5369DA7D5.7
MSTRG.78989.9	239.526	-24.9781	1.32983e-24	2.02341e-20	Traes_7AS_5369DA7D5.7
MSTRG.31665.2	377.367	-26.7836	4.76878e-20	5.80479e-16	Traes_3B_721A780C8.1
TraesCS3B02G024500.1	342.548	-26.6393	6.9055e-20	7.51868e-16	Traes_3B_019A2EEE1.1
TraesCS3B02G014800.1	115.715	-25.1346	1.57596e-19	1.47564e-15	Traes_3B_721A780C8.1
MSTRG.78989.2	33.2066	-23.3963	6.93009e-19	6.02546e-15	Traes_7AS_5369DA7D5.6
MSTRG.46862.2	59.3345	-24.2068	4.43438e-16	3.17515e-12	Traes_4AL_5BD269FF3.1
TraesCS5D02G295300.1	16.2835	23.4999	1.60786e-15	1.08732e-11	Traes_5DL_EECA43030.1
MSTRG.30572.5	13.5678	23.2522	2.12164e-15	1.2994e-11	Traes_3B_17CEB209C.5
MSTRG.11228.2	16.85	23.5247	2.13497e-15	1.2994e-11	Traes_1DL_88544B62D.1
TraesCS2D02G286500.2	12.4948	23.1367	6.11336e-15	3.54357e-11	Traes_2DL_8F3A7977E.1
MSTRG.78989.7	23.8189	-22.9335	1.38956e-14	7.68836e-11	Traes_7AS_5369DA7D5.6
MSTRG.9668.47	6.32471	22.2169	6.9698e-14	3.68869e-10	Traes_1DL_846015F59.9
MSTRG.13817.1	7.96312	-6.19501	8.05077e-14	3.942e-10	Traes_1DL_108721516.5
TraesCS6A02G291900.2	14.5661	-22.2486	8.2603e-14	3.942e-10	Traes_6AL_22D6C7054.6
MSTRG.85744.6	5.99439	22.1442	8.41997e-14	3.942e-10	Traes_7DL_EF8A95CB3.5
MSTRG.41754.3	14.0436	-22.1944	9.4912e-14	4.27895e-10	Traes_4AS_01FF56834.4
TraesCS5D02G404300.1	5.58278	22.012	1.184e-13	5.14722e-10	Traes_5DL_0A7630D1E.2
MSTRG.50259.2	12.8235	-22.0703	1.30357e-13	5.47162e-10	Traes_4DS_2A13108A6.1
TraesCS5B02G022800.1	7.78456	-21.3765	7.46632e-13	3.02946e-09	Traes_5BS_E431D5D9D.2
MSTRG.83821.4	7.19384	-21.2635	9.87774e-13	3.8786e-09	Traes_7AS_2742DDF6C.4
MSTRG.40288.1	6.53768	-4.92474	9.59235e-12	3.64884e-08	Traes_3B_85DC06F0B.2
TraesCS1A02G265600.1	43.089	-3.04988	2.67711e-11	9.87489e-08	Traes_1AL_D1AF9EF20.1
TraesCS2A02G151300.1	35.9403	-8.70834	2.22551e-10	7.96765e-07	Traes_2BS_92A0A645C.3
TraesCS2B02G608600.1	59.3658	3.05327	4.9082e-10	1.61473e-06	Traes_2AL_C4E725422.2
TraesCS3A02G040800.1	90.032	-2.27608	7.55316e-10	2.4195e-06	Traes_3B_37B4D4DBD.1
TraesCS7B02G251100.1	103.218	-1.54524	7.36778e-09	2.2996e-05	Traes_7DL_6EFFDA6D1.2
MSTRG.17630.1	75.5307	-2.01165	2.23884e-08	6.81307e-05	Traes_2BS_DABEABDDC.1
TraesCS5D02G525400.1	22.9892	-4.2684	3.86387e-08	0.000111983	Traes_4AL_BCF48A27B1.1
TraesCS2A02G578900.1	9.49256	5.37343	5.12376e-08	0.000145044	Traes_3B_F6EA6AD27.3
MSTRG.2527.1	167.527	-4.72295	8.88143e-08	0.000245703	Traes_1AL_59800A13E.3
TraesCS7A02G357800.1	9.4903	-3.15009	9.84636e-08	0.000266344	Traes_7AL_1BC53C605.2
TraesCS2B02G097900.1	11.1871	-2.36445	1.61525e-07	0.000427427	Traes_2BS_3F2EDD7AB.2
MSTRG.64873.3	4.28525	4.74719	2.4257e-07	0.000628231	Traes_1BL_FE86EABF5.7
TraesCS7B02G462900.3	10.2981	6.86787	3.23562e-07	0.000790772	Traes_7BL_30B1AD328.2
TraesCS6B02G091700.1	4.30859	3.50877	3.24646e-07	0.000790772	Traes_6BS_A52869C39.1
TraesCS2D02G377900.1	18.6085	1.34672	3.24819e-07	0.000790772	Traes_2DL_FE21F7F7C.1
MSTRG.15316.2	12.5993	-7.19854	3.48353e-07	0.000831437	Traes_2AL_837353248.1
TraesCS5A02G534000.1	9.91419	-2.83767	3.68341e-07	0.000862237	Traes_4BL_F858A2E97.2
MSTRG.36814.1	24.0921	-6.11599	4.13535e-07	0.000949765	Traes_3AS_1D618944D.2
MSTRG.77432.17	10.1107	-6.8713	5.36092e-07	0.00120844	Traes_6DL_9DFF7CA97.17
MSTRG.91113.2	25.3805	-8.20525	5.83166e-07	0.00129065	Traes_7DL_3D7E91E2B.1
MSTRG.94164.1	11.4965	7.02567	6.71261e-07	0.00145909	Traes_2DL_E6CD5A5D0.1
MSTRG.22051.2	9.80125	5.96161	6.86794e-07	0.00146667	Traes_2BL_F85F9E8DC.1
MSTRG.72115.1	23.435	-6.7995	7.00173e-07	0.00146946	Traes_2AL_5F8B0F20C.43
MSTRG.12729.2	21.6265	-3.20391	7.36674e-07	0.00149453	Traes_2AS_BA96EE8B5.5
TraesCS4B02G028800.1	440.897	0.459972	9.23978e-07	0.00181405	Traes_4BS_5BB78FEB9.1
MSTRG.16853.1	3.01016	3.9812	9.44565e-07	0.00182503	Traes_2AL_24A07A10E.1
TraesCS3A02G012200.1	47.9493	-4.83428	1.06699e-06	0.00202936	Traes_5DL_9F03778EF.1
MSTRG.31665.3	65.8216	-10.344	1.12092e-06	0.00209914	Traes_3B_721A780C8.1
MSTRG.26773.1	24.4143	-7.82772	1.19717e-06	0.00220796	Traes_3B_3F7870B8B.2
MSTRG.33233.1	51.4587	1.56826	1.2972e-06	0.00235674	Traes_2BL_41B22695E.1
TraesCS5B02G526500.1	16.9998	-2.3369	1.53431e-06	0.00270672	Traes_5BL_4E18D2CA5.3
TraesCS2A02G468500.1	15.8333	-4.94653	1.58777e-06	0.00275244	Traes_2BL_2B48F410A.1
MSTRG.62970.1	11.6351	1.8152	1.61192e-06	0.00275244	Traes_4BS_915D484FE.5
TraesCSU02G169600.1	23.5423	-2.30911	1.62806e-06	0.00275244	Traes_2DL_17E028CA3.2
TraesCS6A02G294700.1	58.351	-9.26789	1.80386e-06	0.00300788	Traes_6AL_2BF4EAD96.1
MSTRG.21855.1	7.96903	-5.88269	1.85124e-06	0.00304516	Traes_1AS_6C0EACB05.11
TraesCS7A02G198900.1	4.19601	-3.35573	2.42096e-06	0.00387751	Traes_7AS_FEE6CC75E1.2
MSTRG.1960.2	306.777	-2.82659	2.92442e-06	0.00462305	Traes_1AL_E96C0662D.2
TraesCS7B02G493700.1	212.863	-1.17298	3.35093e-06	0.0051632	Traes_2AS_BAD28E539.1
MSTRG.78989.1	48.9646	-8.91931	3.52467e-06	0.005363	Traes_7AS_5369DA7D5.7
TraesCS3A02G260200.1	642.891	-2.50326	4.17389e-06	0.00612856	Traes_3B_EEDAB44DC.1
MSTRG.16203.1	8.79642	-2.26724	4.17885e-06	0.00612856	Traes_2BL_A9211564A.1
MSTRG.39875.1	11.3545	-2.8668	4.38047e-06	0.00634777	Traes_7DL_D99F89DEC.33
TraesCS2A02G467100.1	52.3145	-2.88716	4.90192e-06	0.00701983	Traes_2AL_3D7807781.1
MSTRG.44602.13	43.0651	-8.96869	5.04936e-06	0.00706476	Traes_5DL_FC9E6D3F7.1
MSTRG.14099.4	27.1044	1.74679	5.31801e-06	0.00735608	Traes_2AL_19397AC41.5
TraesCS3B02G584700.1	198.736	-2.22689	5.74642e-06	0.00785936	Traes_3B_F0BA991CF.1
MSTRG.72820.1	16.6164	-3.34157	6.04393e-06	0.00817442	Traes_1BL_CC7DEED87.9
TraesCS1B02G038800.1	12.7296	-5.19347	6.24512e-06	0.00826489	Traes_1BS_2F40F04FC.1
MSTRG.22114.10	5.59956	5.98846	6.24662e-06	0.00826489	Traes_2BL_E094710DC.33
TraesCS2B02G490500.1	1.73327	3.72062	6.61638e-06	0.00852732	Traes_2BL_0091761AD.2
MSTRG.13417.2	15.8809	2.24542	6.65513e-06	0.00852732	Traes_2AS_5F9FFE3E6.4
MSTRG.78989.12	106.973	-9.56807	8.47027e-06	0.01074	Traes_7AS_5369DA7D5.6
TraesCS3A02G281200.1	21.8206	-7.66358	8.74241e-06	0.0109708	Traes_3B_2486127FA.1
TraesCS7B02G460600.1	7.82957	4.78003	9.52979e-06	0.0117173	Traes_7DL_B6B95FA82.2
TraesCS2A02G220400.1	156.544	-1.01307	1.10669e-05	0.0133378	Traes_2DS_FCCFA0BE1.2
TraesCS4B02G328500.1	6.03287	-3.73389	1.23333e-05	0.0147183	Traes_5AL_9AA8A9036.1
MSTRG.29098.1	28.3437	-2.64893	1.25247e-05	0.0148017	Traes_7AL_5E4FB486C.2
TraesCS1D02G215400.1	37.3526	-3.79736	1.3515e-05	0.0158183	Traes_1AL_DDC13A76D.1
TraesCS6B02G281900.1	2.73927	-4.26714	1.47152e-05	0.0170591	Traes_6DL_F19B51AC5.1
TraesCS7A02G156100.1	2.85971	-4.03567	1.56516e-05	0.0179227	Traes_7DS_E5E15103B.1
TraesCS2D02G518200.1	1.79696	-3.99763	1.57546e-05	0.0179227	Traes_2DL_3E4BFB46E.3
TraesCS1B02G225700.1	8.94119	-4.55465	1.67309e-05	0.0187414	Traes_1BL_E2B0DED6A.1
TraesCS7B02G289600.1	5.02822	-4.21312	1.69109e-05	0.0187414	Traes_7DL_2DF9C185B.1
MSTRG.69595.4	30.2918	-7.49052	1.69852e-05	0.0187414	Traes_6AL_EA25F9AE4.1
TraesCS4B02G339400.2	10.0504	-2.2584	1.7204e-05	0.0187414	Traes_4DL_5BFBDD55E.1
MSTRG.45356.1	23.9006	-2.63186	1.76226e-05	0.0189832	Traes_7DS_9E687F5E3.8
TraesCS2A02G480500.1	18.591	-1.71378	1.83048e-05	0.0195452	Traes_2BL_051AAAA05.2
MSTRG.15307.2	71.8153	1.21277	2.36469e-05	0.0248139	Traes_2AL_968941FD9.3
MSTRG.53864.14	6.88518	-6.32349	2.45755e-05	0.0254938	Traes_5DS_4501B11E2.2
MSTRG.38454.3	16.9154	-3.38968	2.47137e-05	0.0254938	Traes_2DL_CF73BB43D.8
MSTRG.39385.2	24.7076	-1.71483	2.53774e-05	0.0259473	Traes_3DL_B2B496552.1
TraesCSU02G201400.1	18.6889	-2.54216	2.55796e-05	0.0259473	Traes_4AL_D1B99269E.1
TraesCS3B02G205700.1	8.63424	-2.47646	2.84628e-05	0.0284045	Traes_3AS_6C0783D0A.2
MSTRG.52828.1	313.972	-2.0714	2.91066e-05	0.0288049	Traes_5BS_94EB99BCB.1
TraesCS3A02G044200.1	4.33327	-2.65447	3.09441e-05	0.0303763	Traes_3AS_22575A326.1
TraesCS7B02G225200.2	3.43583	-5.31607	3.13411e-05	0.0305199	Traes_7AL_41A929C0D.2
MSTRG.20321.3	26.2391	-1.09102	3.3626e-05	0.0324851	Traes_2BL_175C78599.1
MSTRG.61425.1	65.5259	0.772362	3.40342e-05	0.0325722	Traes_5BL_4FE938B74.1
TraesCS1B02G363500.1	20.7638	-2.22192	3.42513e-05	0.0325722	Traes_1BL_9B3C88F90.1
TraesCS6A02G270700.1	143.244	-6.1495	3.49229e-05	0.0329534	Traes_6AL_4000C7B98.1
TraesCS6D02G049600.1	7.20687	-1.94802	3.63729e-05	0.0339868	Traes_6DS_E72E5DE3F.1
MSTRG.47371.7	7.11704	-6.36639	3.68556e-05	0.0339868	Traes_4BL_2E7B3FC9C.1
MSTRG.40658.1	11.0427	5.16095	3.76124e-05	0.0344202	Traes_3B_3E3723D9A.2
TraesCS3A02G327300.1	202.569	-1.93166	3.81739e-05	0.0344202	Traes_3AL_C6F8A5129.1
TraesCS2B02G618500.1	11.9685	1.91298	3.86864e-05	0.0346258	Traes_2BL_0C41F5FAB.1
MSTRG.86127.5	16.2695	-7.56377	3.94669e-05	0.0350665	Traes_7AL_0555E0B39.5
MSTRG.6838.1	5.41144	-2.43753	4.34672e-05	0.0383409	Traes_1BL_5D23F5133.1
TraesCS1B02G276900.1	3.53177	-2.97772	4.58809e-05	0.0398904	Traes_1BL_51774DCD7.1
MSTRG.45412.2	54.4525	-4.8033	4.64119e-05	0.0398904	Traes_4AL_C04AC0228.8
MSTRG.2563.4	19.541	-2.14117	4.64762e-05	0.0398904	Traes_1AL_DA0EE1337.2
TraesCS4A02G346900.1	6.36842	-3.31122	4.70668e-05	0.0400113	Traes_4AL_FFF29DF6B.1
TraesCS3D02G338400.1	14.4741	-4.24478	4.83204e-05	0.0405641	Traes_3B_597AD2CBA.2
TraesCS1D02G101900.1	11.5336	-2.75914	4.86594e-05	0.040569	Traes_1DS_CFB835F0E.1
MSTRG.78989.5	39.2705	-8.64776	4.95871e-05	0.0410612	Traes_7AS_5369DA7D5.7
MSTRG.13052.1	37.8707	-2.16758	5.00266e-05	0.0411452	Traes_2BS_B04945FFC.4
MSTRG.79117.4	63.1065	-0.697514	5.44801e-05	0.0445074	Traes_7AS_D05A2ECB9.2
TraesCS3D02G388500.2	3.27367	2.99718	5.67991e-05	0.0460925	Traes_3DL_421F6D2AB.2
TraesCS3A02G214100.1	2.21272	-3.59828	5.78203e-05	0.0463289	Traes_3B_BC04FA035.2
TraesCS7D02G018300.1	8.70732	-3.65219	5.78516e-05	0.0463289	Traes_4AL_17CAE3587.2
TraesCS5A02G408600.1	12.4345	-4.02699	5.95739e-05	0.0473962	Traes_5DL_927085DBB.2
MSTRG.32746.1	4.7658	2.16921	6.01294e-05	0.0473962	Traes_3B_D45066090.1
TraesCSU02G189800.1	24.2232	-3.00016	6.05151e-05	0.0473962	Traes_3B_9C03707F12.1
TraesCS3A02G344800.1	8.83631	-5.05132	6.07419e-05	0.0473962	Traes_3B_54E1B2770.2
TraesCSU02G100900.1	24.9354	-8.18103	6.28046e-05	0.0486936	Traes_7AL_462A8AD8D.1
MSTRG.22975.3	105.829	-1.17693	6.38454e-05	0.0491872	Traes_2AS_336F93284.2
TraesCS6A02G293200.2	2.66496	-3.47343	6.46663e-05	0.0495063	Traes_6DL_9CC066885.2
MSTRG.40922.2	94.2765	-0.900808	6.64598e-05	0.0503603	Traes_3B_FBE2447AA2.1
MSTRG.72393.17	4.60065	-5.40459	6.6695e-05	0.0503603	Traes_3B_6ECC5482A.9
MSTRG.51610.3	5.56578	2.96577	6.70317e-05	0.0503603	Traes_4DL_B84BC09CF.3
TraesCS2D02G165800.1	141.742	-1.67108	7.11556e-05	0.0523618	Traes_2DS_E72225729.1
MSTRG.12947.2	113.628	1.13568	7.39942e-05	0.0539338	Traes_2BS_DEC12328A.3
MSTRG.78989.13	41.0986	-8.9011	7.71329e-05	0.0558869	Traes_7AS_5369DA7D5.7
TraesCS4D02G007400.1	53.0942	-1.84704	7.81557e-05	0.0561819	Traes_4AL_CC989B4A5.1
MSTRG.30635.4	11.5556	-3.96296	7.84631e-05	0.0561819	Traes_3B_A7F590466.3
TraesCS2A02G507200.1	27.5995	0.76087	8.20064e-05	0.0583756	Traes_2DL_CE97C1E31.1
MSTRG.16045.1	4.29819	-4.99109	8.35105e-05	0.0591007	Traes_6AL_2D42A5FD8.1
MSTRG.31054.4	4.0732	5.53261	8.69252e-05	0.0611617	Traes_1DL_85E3887C3.4
TraesCS4D02G235200.1	79.2774	-2.62951	8.82493e-05	0.0613837	Traes_4BL_BAFA18B1D.1
TraesCS1B02G202400.1	39.9681	-1.16619	8.90615e-05	0.0615475	Traes_1BL_8617E565C.1
TraesCS5A02G150700.1	2.41458	-3.32712	9.00016e-05	0.0615475	Traes_5BL_BF328BC61.1
TraesCS7D02G420500.1	35.9201	-0.929392	9.07636e-05	0.0617218	Traes_7AL_3E96F374E.3
TraesCS7A02G168900.1	27.9602	-4.52991	9.54095e-05	0.0645207	Traes_7AS_8257B2226.2
TraesCS2A02G551000.1	30.3585	-1.90377	9.68026e-05	0.0647681	Traes_2BL_5FF85C7F2.3
MSTRG.65083.1	294.788	-0.394232	9.68395e-05	0.0647681	Traes_5DL_9F421ABDC.3
MSTRG.76332.3	16.0771	0.909666	9.83497e-05	0.0654187	Traes_6DS_B792C9D1E.1
MSTRG.52441.1	4.733	3.2315	9.90481e-05	0.0655252	Traes_7DL_6060132E4.1
TraesCS7A02G325000.1	35.1858	-5.70454	0.000103291	0.0679628	Traes_7AL_F445E67BB.3
MSTRG.37104.6	3.05605	3.43993	0.000104201	0.0681932	Traes_3DS_D2A54EE71.1
TraesCS1D02G270500.1	11.6819	-7.08446	0.000105031	0.0683178	Traes_1AL_3F7734C6B.1
TraesCS3D02G010600.1	35.097	-8.67338	0.000106075	0.0683178	Traes_3B_721A780C8.1
MSTRG.49517.6	5.32672	5.36232	0.000106076	0.0683178	Traes_4DS_3CD86327C.1
MSTRG.31752.1	32.5817	-8.56616	0.000110029	0.0704912	Traes_3B_019A2EEE1.1
TraesCS1D02G327200.1	634.927	-0.615997	0.000116119	0.0740028	Traes_1DL_DF3CA9CCC.2
TraesCS1B02G002700.1	4.60144	2.40607	0.000122321	0.0762667	Traes_1BS_F17BA7F1F.1
MSTRG.87605.4	8.3056	3.67686	0.00012278	0.0762667	Traes_7BL_B73B43D74.9
TraesCS1A02G090200.1	11.9091	-2.88539	0.000122804	0.0762667	Traes_7AS_DD0B7AB0A.7
MSTRG.13446.1	41.6746	0.882514	0.000124183	0.0763446	Traes_2AS_35DE62C3A.4
MSTRG.78989.11	30.6391	-8.4774	0.000130744	0.079353	Traes_7AS_5369DA7D5.7
MSTRG.30661.3	7.92643	-2.37247	0.000133212	0.0802734	Traes_3DL_3DB9F1EC5.7
TraesCS3A02G388100.1	17.1396	-1.69716	0.000134324	0.0804392	Traes_2DL_11CEF7069.1
MSTRG.11909.1	1.68222	-3.32795	0.000134809	0.0804392	Traes_3B_7C1AD33E0.1
MSTRG.16434.2	29.3915	-8.41742	0.000136841	0.0812536	Traes_2AL_3335311FF.5
MSTRG.70367.1	30.3018	-8.4615	0.00013751	0.0812543	Traes_6DL_461005316.9
TraesCS6A02G222800.1	94.0283	-1.11031	0.000138565	0.0814824	Traes_4AL_892C47ED5.1
MSTRG.6699.1	5.32143	-5.2899	0.000140834	0.0819369	Traes_2BL_D88AFD39A.9
TraesCS4D02G084900.1	51.8434	-0.522769	0.000141034	0.0819369	Traes_4BS_500933268.1
TraesCS1B02G276800.1	9.59226	-2.361	0.000141358	0.0819369	Traes_1BL_0A3CDBCFC.1
MSTRG.45350.1	9.78049	-6.5053	0.000142298	0.0819864	Traes_7DS_BA6406D33.1
MSTRG.30105.1	390.827	-0.915314	0.00014378	0.0819864	Traes_3B_620A2C0FC.1
TraesCS3D02G060000.1	9.59311	-4.0562	0.000144036	0.0819864	Traes_3DS_735801C27.1
MSTRG.78989.10	28.5958	-8.37789	0.00014421	0.0819864	Traes_7AS_5369DA7D5.6
TraesCS7B02G008300.1	15.082	-6.8077	0.000148235	0.0835366	Traes_7DS_578765829.2
TraesCS3A02G073700.1	2.75806	-2.78652	0.000149837	0.08405	Traes_3B_67FB55469.1
TraesCS5A02G018200.1	795.401	-1.61991	0.000150585	0.0840825	Traes_5AS_381655EE4.2
TraesCS4A02G363900.1	23.4271	-4.42971	0.000152604	0.0846259	Traes_5DL_FC9E6D3F7.1
TraesCSU02G250000.1	157.237	-3.31541	0.000152949	0.0846259	Traes_6AS_F8D06BEC8.5
TraesCS6D02G072100.1	307.226	-1.40984	0.000155412	0.0850121	Traes_6AS_D3AA43E2B.1
TraesCS1A02G322700.1	7.82453	-4.09048	0.00015644	0.0850121	Traes_1AL_E885D6292.2
MSTRG.83201.4	88.1631	0.656711	0.000171834	0.0917037	Traes_7AL_7B204667E.2
MSTRG.17146.1	4.26479	-4.63233	0.000172423	0.0917037	Traes_2BS_B98E8975C.2
TraesCS1A02G265900.1	3.18955	-4.19188	0.000173203	0.0917037	Traes_1BL_51774DCD7.1
TraesCS5D02G276600.1	4.82784	-1.92453	0.000173591	0.0917037	Traes_5DL_695FB83A4.1
TraesCS5B02G015500.1	838.342	-1.86284	0.000174172	0.0917037	Traes_5BS_94EB99BCB.1
MSTRG.35756.2	4.18729	-5.59835	0.000174902	0.0917037	Traes_3B_636D755BB.2
MSTRG.54898.1	54.3514	1.48923	0.000175849	0.0917037	Traes_5BL_8BEF7F9CD.2
TraesCS3B02G004300.1	7.09611	-4.4689	0.000176288	0.0917037	Traes_3B_3EE0459B4.1
TraesCS1A02G217200.1	238.888	0.441106	0.00017835	0.0921222	Traes_1AL_6F2E87864.2
MSTRG.25868.1	2.40997	2.23182	0.000179505	0.0921222	Traes_2AL_91BC4E43D.6
MSTRG.62283.2	40.6753	-6.41083	0.000179947	0.0921222	Traes_5BL_3DABA2892.2
TraesCS2A02G558300.1	2.77755	4.3519	0.000182134	0.0923761	Traes_2AL_355107900.3
TraesCS6A02G223000.1	16.8005	-2.1632	0.000185165	0.0935044	Traes_6DL_1AEA7B869.2
MSTRG.16434.3	27.1671	-8.30402	0.000185895	0.0935044	Traes_2AL_3335311FF.4
TraesCS1A02G300200.2	8.75335	-4.09787	0.000188468	0.0940215	Traes_3B_54E1B2770.2
TraesCS1D02G266000.1	4.99185	-2.54032	0.000192635	0.0949895	Traes_1BL_0A3CDBCFC.1
TraesCS7D02G019200.1	9.97982	-2.8315	0.000192749	0.0949895	Traes_7DS_8AFA43440.1
MSTRG.54959.1	14.0394	6.48092	0.000195918	0.0952951	Traes_4AL_398B38CAB.20
TraesCS5B02G498500.1	4.1421	-4.22348	0.000196979	0.0952951	Traes_5BL_06D4312EE.1
TraesCS7B02G029800.6	4.33396	-5.64789	0.000198302	0.0954085	Traes_7BS_BDA361F41.3
MSTRG.84870.3	7.32683	1.52886	0.000201648	0.0966361	Traes_7DS_BB0ADF07C.2
MSTRG.88199.1	1.42844	-3.68916	0.000206657	0.0986483	Traes_7DS_1F4C64537.1
MSTRG.64190.8	3.83602	-5.46974	0.000208864	0.0993124	Traes_5AL_BF2994143.1
TraesCS3A02G512400.1	9.51435	-3.12267	0.000211076	0.0999738	Traes_3AL_0E6607DDB.1
TraesCS2B02G489700.1	89.2092	1.549	0.000216286	0.101382	Traes_2BL_7E0724A29.6
MSTRG.93159.6	2.64742	-4.94185	0.000216416	0.101382	Traes_6AS_8F7AD86B51.2
MSTRG.73975.2	56.9444	-1.2401	0.000216547	0.101382	Traes_6DL_C593A4982.1
TraesCS2D02G226000.1	83.9075	-1.6351	0.000217382	0.101383	Traes_2DS_FCCFA0BE1.2
TraesCS3A02G486000.1	30.2767	-0.999783	0.000222935	0.103576	Traes_3B_766459852.1
MSTRG.1614.3	71.6153	-0.693057	0.000223979	0.103665	Traes_1AL_440FA4947.1
TraesCS7B02G256000.1	220.649	-1.61393	0.000226836	0.104589	Traes_7AL_FAE816A85.1
TraesCS2A02G245100.2	33.0643	1.71194	0.000234969	0.107539	Traes_2AL_19397AC41.6
MSTRG.56767.1	10.0729	-6.87442	0.00023565	0.107539	Traes_5BL_C4A77F5DB.1
TraesCS7D02G108900.1	3.58118	-3.41732	0.000235884	0.107539	Traes_7AS_C719B1331.2
TraesCS3D02G136900.1	23.319	-1.86278	0.000238252	0.107539	Traes_3B_D4262248A.1
MSTRG.69046.4	21.368	-4.08275	0.000238534	0.107539	Traes_6AL_7C68630FC.5
TraesCS6B02G205900.1	9.1777	-1.98235	0.000244262	0.109715	Traes_6AS_B6D1976D6.1
TraesCS3A02G266300.2	85.9181	-1.44777	0.000250696	0.111821	Traes_3DL_F5AAA74C3.1
TraesCS1D02G265800.1	70.5628	-4.61466	0.000250787	0.111821	Traes_1DL_A6553EC96.1
TraesCS3D02G524700.1	3093.87	-1.56955	0.000252309	0.112089	Traes_3B_F0BA991CF.1
TraesCS2D02G224200.1	19.049	-2.73921	0.000257034	0.113074	Traes_2BS_5E392919C.1
MSTRG.72461.13	3.88558	5.46065	0.000257615	0.113074	Traes_3DL_F13709C9F.3
MSTRG.24991.2	23.1605	-1.42361	0.000258242	0.113074	Traes_2AL_AA9826E22.1
MSTRG.36877.1	7.88924	-6.19064	0.00026539	0.115672	Traes_3DS_8610F4218.7
TraesCS3B02G211600.1	15.7265	-1.30846	0.000266077	0.115672	Traes_3B_63D51F3D9.1
TraesCSU02G203400.1	22.4753	-5.27578	0.000269999	0.11696	Traes_3B_5500D69F3.1
TraesCS3A02G260800.1	2.95753	-2.93268	0.000283032	0.120884	Traes_3B_23B7A9A57.2
TraesCS1B02G407300.1	4.9798	-3.4026	0.000287126	0.121304	Traes_1AL_0D6ADE0A3.1
TraesCS2B02G592400.1	17.3354	-3.21786	0.000288711	0.121304	Traes_2AL_3E1961FE8.1
MSTRG.41642.3	7.13258	-6.37429	0.000289182	0.121304	Traes_4AS_60CCDC3C2.3
TraesCS6B02G258400.1	24.7896	-1.95939	0.000290146	0.121304	Traes_6DL_1AEA7B869.2
MSTRG.78983.1	21.2793	-7.95178	0.000290991	0.121304	Traes_7AS_5369DA7D5.2
TraesCS5D02G530800.1	4.45833	-5.36461	0.000292733	0.121346	Traes_5DL_DBE8E64C4.1
TraesCS5B02G511800.2	8.88764	-6.68805	0.000293084	0.121346	Traes_5BL_2DF779ADD.2
MSTRG.22975.2	6.83583	-4.2862	0.000294606	0.121562	Traes_2AS_336F93284.2
MSTRG.8841.4	81.3235	0.632802	0.000296299	0.121848	Traes_1DS_248F1A4C2.3
TraesCS7A02G056800.1	3.43858	-5.31248	0.000297785	0.122047	Traes_4AL_2E4552E00.1
TraesCS3A02G355400.1	18.9874	2.02161	0.000301932	0.123171	Traes_3AL_F97EA0BF0.2
TraesCS1D02G436900.1	27.1286	-2.9402	0.000302791	0.123171	Traes_1DL_06F7DAE16.1
TraesCS1A02G037900.1	70.043	-1.27004	0.000303563	0.123171	Traes_1AS_ED31ACF8B.2
TraesCS3D02G509200.1	18.2769	-2.06012	0.000306756	0.123769	Traes_3DL_C2FAFEF64.1
MSTRG.71676.3	14.4738	1.59016	0.000312816	0.125668	Traes_6DS_C48509C38.1
TraesCS1A02G325800.1	5.41912	-2.20455	0.000318466	0.12677	Traes_1AL_0AFB4491D.7
TraesCS6B02G126400.1	42.9267	-1.51228	0.000318682	0.12677	Traes_6DS_50AE0D0A6.1
MSTRG.36886.5	3.13967	-5.19315	0.000321089	0.127311	Traes_3DS_8610F4218.3
TraesCS4B02G218900.1	6.04278	-1.47201	0.0003255	0.128225	Traes_4BL_A7420FB2A.1
MSTRG.69595.1	19.2287	-7.80557	0.000327801	0.128352	Traes_6AL_2BF4EAD96.1
TraesCS5A02G314000.2	191.103	-0.788095	0.000327931	0.128352	Traes_5AL_571011ABA.1
MSTRG.53864.3	3.25694	5.20836	0.000331656	0.12898	Traes_5DS_4501B11E2.2
MSTRG.10118.3	4.7169	-3.59938	0.000333352	0.128992	Traes_4DL_CD971E73A.1
TraesCS4A02G109200.1	47.1948	-1.98345	0.000333805	0.128992	Traes_4DL_3079F96E7.1
TraesCS5B02G528800.1	4.83684	2.95462	0.000336746	0.129446	Traes_5BL_A6854B422.1
TraesCS4A02G489900.1	7.31981	-6.08739	0.000337892	0.129446	Traes_7DS_BA6406D33.1
TraesCS7D02G080600.1	24.5683	-1.39282	0.000338902	0.129446	Traes_7DS_E50749E85.1
TraesCS7D02G169500.1	4.7325	-2.226	0.000339234	0.129446	Traes_7DS_43B37BC41.2
MSTRG.31750.1	9.03348	-3.76245	0.00034107	0.129605	Traes_3B_6F540DE65.2
MSTRG.27058.1	11.3012	-7.03996	0.000341781	0.129605	Traes_3B_5500D69F3.1
TraesCSU02G020700.1	2.24317	-3.04167	0.000344014	0.130047	Traes_2DL_17E028CA3.2
TraesCS6B02G234000.1	57.7305	0.573491	0.000357413	0.134366	Traes_6BL_EFAF71592.1
TraesCS6B02G295100.1	4.34218	-1.84228	0.000365526	0.136361	Traes_6AL_3C96C6BAD.2
TraesCS7A02G043600.1	14.1122	-1.11659	0.000366322	0.136361	Traes_4AL_38AADA33F.1
MSTRG.29068.3	114.106	-1.25863	0.000367438	0.136361	Traes_3AL_9F1E0BAE1.3
MSTRG.8159.1	28.9697	-2.81564	0.000368766	0.136438	Traes_4AL_C467B516F1.1
TraesCS7D02G541100.2	28.4256	-3.14631	0.000371492	0.136757	Traes_7DL_AC271F4EE.2
TraesCS1A02G212000.1	5.48959	-4.99007	0.000371876	0.136757	Traes_1BL_E2B0DED6A.1
TraesCS1A02G419100.1	52.3353	0.993999	0.00037554	0.137689	Traes_1AL_169CE67D8.1
TraesCS3A02G237700.3	2.32083	-4.07089	0.000377254	0.137777	Traes_3B_EC845F846.2
MSTRG.16615.1	9.32806	1.18089	0.000378045	0.137777	Traes_6BS_A7412B04D.3
TraesCS6B02G362000.1	3.38689	-2.65144	0.000396504	0.142596	Traes_6AL_AE7EF8E87.1
MSTRG.84455.3	104.778	-0.532742	0.000397126	0.142596	Traes_7BS_66163ADFE.4
TraesCS1A02G212400.1	9.3002	-4.51207	0.000402217	0.143148	Traes_1AL_DDC13A76D.1
TraesCS1A02G166600.1	16.9875	-1.51505	0.00040366	0.143148	Traes_1AL_82AAF3E95.1
MSTRG.25535.1	43.2987	-0.877546	0.000405402	0.143148	Traes_2BS_1F5C08272.5
MSTRG.73395.6	1.54875	3.17008	0.000406926	0.143148	Traes_6AL_10D9FAC80.8
MSTRG.78990.2	16.8661	-7.61625	0.000407912	0.143148	Traes_7AS_5369DA7D5.5
MSTRG.13286.1	3.77738	-3.46739	0.000408649	0.143148	Traes_6AL_D1E0B4F67.9
TraesCS3A02G229700.1	8.85289	-1.69922	0.000410535	0.143148	Traes_3B_9D42C12D8.3
MSTRG.35786.1	7.76581	-1.75646	0.000410781	0.143148	Traes_3DL_A466BAECF.9
TraesCS2A02G547300.1	89.2373	-2.07612	0.00041109	0.143148	Traes_2BL_7A73E13F9.1
MSTRG.23556.1	2.83091	-5.03511	0.000413071	0.143148	Traes_2AS_35DE62C3A.4
MSTRG.29921.1	49.7711	-1.55214	0.000414695	0.143148	Traes_3AL_B27F0D4FF.4
MSTRG.82809.1	5.99497	2.44059	0.000417112	0.143148	Traes_7AL_62C07C762.2
TraesCS5A02G326300.3	263.251	-0.833401	0.000420269	0.143148	Traes_5BL_5A648D29D.1
MSTRG.12866.1	8.36793	-3.88415	0.000422467	0.143148	Traes_2AL_94BE56A43.9
TraesCS5D02G431700.1	199.869	0.413816	0.000422846	0.143148	Traes_5DL_D994DF96F.1
MSTRG.39791.1	189.394	-1.28344	0.000424102	0.143148	Traes_3B_620A2C0FC.1
TraesCS1A02G265700.1	2.51828	-3.20204	0.00042436	0.143148	Traes_1AL_326B4C863.1
MSTRG.62095.8	23.3308	-6.63235	0.000425379	0.143148	Traes_5BL_0A245D856.1
TraesCS5A02G403600.1	32.0451	-1.8997	0.00042593	0.143148	Traes_5DL_75912CDD6.2
MSTRG.45253.6	16.2547	-7.5632	0.000427105	0.143148	Traes_7AS_6041D0C1C.1
TraesCS5B02G552000.1	5.75655	-2.66013	0.000429085	0.143148	Traes_5BL_F91558953.1
TraesCS2D02G097500.1	1172.65	0.278538	0.000431799	0.143543	Traes_2DS_71C3E4D49.5
MSTRG.2842.2	18.153	-1.37103	0.000432782	0.143543	Traes_1AL_47D54EF1E.1
TraesCS6A02G170400.1	6.95888	-1.60245	0.000436227	0.144293	Traes_6AS_BBF3A134B.2
TraesCS1D02G155800.1	13.4448	0.931986	0.000442343	0.145626	Traes_1BL_4BC57373A.1
TraesCS6B02G004000.1	219.352	-2.35089	0.00044265	0.145626	Traes_6BS_7BD1D9DDE.1
TraesCS5B02G505300.1	28.6738	-2.06126	0.000444497	0.145839	Traes_5BL_127F05F26.1
TraesCS4D02G200700.1	29.1149	-2.10903	0.000446096	0.145971	Traes_4DL_92CE4A8D1.1
TraesCS3A02G044000.1	81.9533	-1.88855	0.000448171	0.146256	Traes_3B_600FC81DA.1
TraesCS6D02G084300.1	28.7135	-1.37383	0.000455182	0.146437	Traes_6DS_50AE0D0A6.1
TraesCS2D02G107600.1	72.5694	-1.91059	0.000458227	0.146437	Traes_2DS_708F03DA3.1
TraesCS1A02G025100.2	31.0791	0.680472	0.000459551	0.146437	Traes_1AS_79C89E16F.1
TraesCS6D02G185800.1	167.896	0.477909	0.000464674	0.147298	Traes_6DL_342E40B9A.1
TraesCS2B02G429600.1	14.5237	-2.27067	0.000473886	0.149828	Traes_2DL_43381AFB9.1
MSTRG.31378.3	3924.13	-1.33002	0.000475698	0.149917	Traes_3B_F0BA991CF.1
MSTRG.93725.2	15.9011	-7.53171	0.00047663	0.149917	Traes_3B_721A780C8.1
MSTRG.18029.1	70.3829	-1.26876	0.000478987	0.150166	Traes_2AS_336F93284.2
TraesCS3B02G021700.1	6.60013	-1.6061	0.00047989	0.150166	Traes_3B_9296F5FE3.1
TraesCS6A02G098500.1	10.7162	-2.80795	0.000488072	0.152018	Traes_6DS_50AE0D0A6.1
TraesCS5A02G304200.1	5.96719	-6.1186	0.000488307	0.152018	Traes_5DL_EE6797852.1
TraesCS3A02G490900.1	11.7412	0.889689	0.000490168	0.152209	Traes_3AL_4B5816218.1
MSTRG.87679.3	18.6241	1.3543	0.00049436	0.15312	Traes_7DL_AF7FD32FE.3
TraesCS6D02G223300.1	12.3909	-1.18288	0.000502379	0.155208	Traes_6DL_C230EB5A0.2
MSTRG.44602.3	15.2532	-7.47152	0.000505614	0.155217	Traes_5DL_FC9E6D3F7.1
MSTRG.56033.1	101.129	0.359337	0.000505695	0.155217	Traes_5DL_32522985E.2
MSTRG.17630.2	350.346	-1.39709	0.000507346	0.155217	Traes_2BS_DABEABDDC.1
MSTRG.14425.2	2.93865	-4.74626	0.000507995	0.155217	Traes_1BS_C362E6D6E.18
MSTRG.13421.1	22.0431	-1.89752	0.000509453	0.155217	Traes_2DL_0F42DC919.6
MSTRG.69136.2	2.86203	-5.05801	0.000510057	0.155217	Traes_6AL_F996AECD9.17
TraesCS7A02G532900.1	6.40306	-1.87552	0.000513283	0.155567	Traes_7DL_096EBE69E.1
TraesCS2A02G105900.1	20.3479	-3.26795	0.000513814	0.155567	Traes_2AS_BA96EE8B5.1
TraesCS3B02G006800.1	40.2365	-4.10681	0.000515043	0.155567	Traes_3B_C428452D2.2
MSTRG.87601.4	16.9808	5.13746	0.000517445	0.155906	Traes_7BL_3D33964D9.1
TraesCS1B02G276200.1	3.08374	-3.82046	0.00052187	0.156662	Traes_1BL_0D8FFB3C2.1
TraesCS2B02G244600.1	12.8899	-3.30073	0.000522529	0.156662	Traes_2BS_5E392919C.1
TraesCS7D02G348900.1	98.0519	0.353668	0.00052949	0.158359	Traes_7DL_81F1AE713.1
MSTRG.87697.1	37.2995	-1.78746	0.000531632	0.15861	Traes_4AL_DF6F2E533.1
TraesCS6B02G092300.6	3.95544	-3.81112	0.000539345	0.159836	Traes_6AS_A938111EE.8
TraesCS3D02G039400.1	9.11688	-1.94776	0.000539351	0.159836	Traes_3B_37B4D4DBD.1
MSTRG.16433.6	10.3538	-6.58802	0.000541542	0.159836	Traes_6BL_D26547564.4
MSTRG.13896.1	6.56505	-4.01506	0.000541846	0.159836	Traes_3B_5F0E254DA.4
TraesCS4B02G168900.3	8.61317	6.60926	0.000542781	0.159836	Traes_4BL_D75271319.1
TraesCS7D02G484500.1	2.28471	-3.69597	0.00054362	0.159836	Traes_7DL_E6FDDEF7A.1
TraesCS2A02G219600.1	8.68757	-3.77072	0.000551591	0.160628	Traes_2AS_992E876B0.1
MSTRG.57014.2	5.23325	-3.17552	0.000559205	0.162456	Traes_5AL_9AA8A9036.3
TraesCS1A02G423100.1	9.17422	-1.75717	0.000563048	0.162809	Traes_1AL_5C8689E82.4
MSTRG.62095.20	9.77786	1.99634	0.000563095	0.162809	Traes_5BL_BF6BA47D7.8
MSTRG.44076.1	77.664	0.633056	0.000565718	0.162959	Traes_4AL_38B1ACFF0.5
MSTRG.6045.1	78.8743	-1.31033	0.000568499	0.163209	Traes_1DL_95936DC50.1
TraesCS3B02G529400.1	98.1924	-1.85971	0.000575009	0.164303	Traes_3B_766459852.1
MSTRG.49230.2	568.315	-0.420796	0.000591931	0.168334	Traes_4BL_DF4B64629.1
TraesCS5B02G149300.1	3.0283	-2.92896	0.000593267	0.168334	Traes_5BL_BF328BC61.1
TraesCS7D02G258100.1	1.56616	3.83585	0.000599996	0.169213	Traes_7BS_C80D337FD.1
TraesCS2A02G381000.1	8.96209	-1.75054	0.000600535	0.169213	Traes_2DL_8C21AAAEF.3
TraesCS5D02G398400.1	21.4827	-1.31612	0.000603227	0.169579	Traes_5BL_7D5EC9052.2
MSTRG.78239.3	88.4515	0.935093	0.000610971	0.17136	Traes_6DL_3AE251888.1
MSTRG.69595.3	13.4112	-7.28572	0.000621368	0.173477	Traes_6AL_2BF4EAD96.1
TraesCS2D02G081400.1	203.891	-1.78547	0.000633212	0.175977	Traes_2DS_01D75F7C6.2
TraesCS2A02G447700.1	15.874	0.994483	0.00063506	0.176088	Traes_2BL_8B7902448.1
TraesCS2D02G583100.1	5.70908	-2.60002	0.000641011	0.177239	Traes_2BL_B36482127.1
TraesCS2A02G466100.1	5.20455	2.97799	0.000642943	0.177239	Traes_2BL_B489A39AC.1
TraesCS2A02G515100.1	4.4395	1.36501	0.000643578	0.177239	Traes_2AL_29B2C075A.2
TraesCS4B02G299100.1	150.467	0.436374	0.000648768	0.178075	Traes_4BL_41FA8C663.1
TraesCS1B02G193700.2	6.92019	-2.81925	0.00064954	0.178075	Traes_1DL_ED13E4244.2
TraesCS4A02G194800.1	31.9591	-2.53693	0.000652602	0.178112	Traes_4AL_A8EEBE537.1
MSTRG.38448.4	2.19465	-4.32454	0.000658695	0.179333	Traes_3AL_9321D26CA.1
TraesCS6D02G227800.1	8.00665	-1.48257	0.000661494	0.179333	Traes_6DL_05607DE51.2
MSTRG.62076.3	7.21911	-5.72521	0.000666151	0.179517	Traes_5BL_8D7CE9CF9.6
MSTRG.89264.2	19.9138	-1.34321	0.000668001	0.179517	Traes_7DS_EDD619B0C.3
MSTRG.47122.4	8.80327	6.64129	0.000668074	0.179517	Traes_1AL_5EE5C4D0C.5
MSTRG.21788.4	12.8148	-7.22062	0.000671803	0.179914	Traes_2BL_F79009979.1
TraesCS4B02G024100.1	18.6266	2.08113	0.000673043	0.179914	Traes_4BS_7BD8F662C.1
MSTRG.92696.2	42.1401	-2.46303	0.000673986	0.179914	Traes_3AL_A8B1CC357.3
TraesCS2A02G347800.1	3.31115	-2.10418	0.000678004	0.180591	Traes_2AL_3E2D1C695.2
MSTRG.76204.3	15.9528	-7.53321	0.000680233	0.180789	Traes_6DS_11E957F4D.2
TraesCS6D02G212200.2	24.0674	-1.93659	0.000682281	0.180938	Traes_6DL_1AEA7B869.2
MSTRG.77806.7	8.05699	6.51182	0.000691002	0.182853	Traes_6DL_966756484.1
MSTRG.67438.3	36.237	-0.766089	0.00069344	0.1831	Traes_7AS_516D78F25.3
TraesCS4D02G262700.1	60.514	0.405921	0.000697118	0.183324	Traes_4DL_8E7469C17.2
TraesCS4D02G195700.1	20.5319	-2.16474	0.0006973	0.183324	Traes_4DL_3079F96E7.1
MSTRG.62279.2	38.2124	1.1946	0.000698833	0.183331	Traes_5DL_51681402F.1
MSTRG.31755.15	15.2626	-6.82462	0.000704714	0.184476	Traes_3B_BB8548656.1
TraesCS3B02G416300.1	40.7341	0.585165	0.000711427	0.185833	Traes_3DL_D450A177E.2
TraesCS4A02G330000.1	13.7875	-1.79386	0.000714574	0.185858	Traes_4AL_1906273A1.2
TraesCS6D02G214300.1	159.236	-1.19494	0.000721805	0.186657	Traes_6DL_2918A17AC.1
TraesCS1B02G226000.1	6.64408	-3.46712	0.000722885	0.186657	Traes_1BL_8E3D5E5DF.1
TraesCS3A02G060100.1	13.2257	-7.26596	0.00072378	0.186657	Traes_3AS_2F3F7EE70.1
MSTRG.20339.3	6.1707	-2.84235	0.000728526	0.187484	Traes_2BL_FDF5ED8FA.3
MSTRG.27311.5	122.098	-0.689772	0.00073407	0.188115	Traes_3AS_66257D20F.1
TraesCS1B02G310300.1	2.01839	-4.5308	0.000737519	0.188602	Traes_3B_54E1B2770.2
MSTRG.87127.4	31.0703	-0.973954	0.000740252	0.188904	Traes_7BL_07CC0B6EF.1
TraesCS2D02G552100.1	9.73223	-1.63752	0.000743794	0.189194	Traes_2BL_5FF85C7F2.3
TraesCS7D02G078700.1	26.0402	-1.11209	0.000744497	0.189194	Traes_4AL_DEF089EE0.1
MSTRG.81734.1	74.4394	-1.18159	0.000752	0.190702	Traes_7DL_A95F658D8.2
TraesCS4A02G386500.2	3.4278	-1.92944	0.00076265	0.192202	Traes_4AL_94E76D27B.1
TraesCS7B02G252900.1	127.745	0.400198	0.000768407	0.193036	Traes_7BL_6EE2BAB37.1
MSTRG.31249.1	50.1366	-1.04554	0.000772923	0.193589	Traes_3AL_2DFA99E9A.2
TraesCS7B02G253700.1	32.1094	-2.4783	0.000780437	0.195069	Traes_7AL_F8EB563ED.1
TraesCS4B02G262800.1	12.355	-1.78793	0.000787454	0.196014	Traes_4DL_C78813F15.1
TraesCS3B02G042700.1	3.69843	-3.77403	0.000787921	0.196014	Traes_3B_37B4D4DBD.1
MSTRG.62095.2	10.6436	-4.75431	0.00079066	0.196014	Traes_5BL_0A245D856.1
TraesCS3B02G307800.1	1.6254	-3.87832	0.000796233	0.196995	Traes_3B_F3882622D.1
TraesCS6B02G205100.1	11.5702	-7.07317	0.000800392	0.197448	Traes_6AS_4E2AEFF8F.1
TraesCS1B02G462000.1	28.7391	-1.88004	0.000801309	0.197448	Traes_1BL_3A901257A.2
MSTRG.83376.1	8.82722	-6.35524	0.000816037	0.199997	Traes_7DS_578765829.4
MSTRG.31785.6	515.186	-1.07149	0.000818324	0.199997	Traes_3B_BEF2FDE60.1
MSTRG.78084.2	15.1368	-7.4603	0.000819492	0.199997	Traes_6DL_B78A92435.3
TraesCS5A02G248700.2	17.7541	-1.78765	0.000820648	0.199997	Traes_5BL_1E6720B2B.5
TraesCS7D02G328700.1	2.83752	-2.1372	0.000821511	0.199997	Traes_7DL_7716C6556.2
TraesCS4A02G044000.1	20.0538	-1.28339	0.000836483	0.202831	Traes_4BL_A289962F61.1
TraesCS4B02G317800.1	26.2078	0.813853	0.000844517	0.204372	Traes_4BL_28618DD29.1
TraesCS3B02G024300.1	11.2813	-7.03646	0.000846873	0.204406	Traes_3B_31DB849ED.1
MSTRG.31751.2	11.4454	-7.05745	0.000848202	0.204406	Traes_3B_31DB849ED.2
TraesCS6B02G202900.1	3.02325	2.17134	0.000851115	0.204406	Traes_6AS_87F52F98E.2
TraesCS1A02G082200.1	70.1492	-0.784861	0.000851375	0.204406	Traes_1AS_188F596C7.1
MSTRG.14044.2	3.42249	4.66574	0.000855064	0.204887	Traes_2AS_6EE3793BB.1
MSTRG.62076.2	11.6184	-7.07938	0.000861072	0.205057	Traes_5BL_8D7CE9CF9.1
TraesCS7B02G419000.1	7.49977	-2.48293	0.000862122	0.205057	Traes_7DL_9A293EA4D.3
TraesCS7B02G022300.2	40.0243	1.83729	0.000878299	0.208403	Traes_7DS_F5343C374.2
TraesCS3B02G049100.10	9.66098	-3.61314	0.000889716	0.210458	Traes_3B_91F35A8BA.2
TraesCS2B02G040100.1	3.88252	-2.85145	0.000890414	0.210458	Traes_2BS_CF4F892DD.1
TraesCS2B02G538100.1	4.94974	-3.37378	0.000893621	0.210806	Traes_2AL_3335311FF.5
TraesCS2A02G136500.1	17.4124	-7.66147	0.000897135	0.210819	Traes_2AS_70A307642.2
MSTRG.84905.8	2.50415	-4.84838	0.00089714	0.210819	Traes_7BS_FAA8243CB.9
MSTRG.39453.1	13.8135	-3.13958	0.000903308	0.21186	Traes_3B_74A673B19.1
MSTRG.8359.5	68.6327	-1.01951	0.000905185	0.211892	Traes_1DS_3F43D98D3.3
TraesCS2A02G510800.1	25	1.62593	0.000915161	0.213816	Traes_2AL_50688E13F.1
MSTRG.68517.1	18.2371	-3.46401	0.000925105	0.215725	Traes_5DL_FC9E6D3F7.3
MSTRG.56225.2	59.2766	-1.89396	0.000959577	0.222562	Traes_5DL_B2F166A31.2
TraesCS1B02G295700.1	94.3994	0.45091	0.000959911	0.222562	Traes_5BL_8601EC2E0.1
TraesCS1B02G085800.1	4.23588	3.96609	0.000965622	0.223037	Traes_1DS_F0D75DD34.1
TraesCS3A02G510100.1	638.23	-1.88049	0.0009743	0.22419	Traes_3B_E09463998.4
TraesCS3A02G520600.1	5.89144	-2.57062	0.000991803	0.227358	Traes_3B_10E6AD0A9.1
TraesCS7D02G359500.1	3.66223	-3.65499	0.000995272	0.227724	Traes_7DL_F842DB269.1
MSTRG.39401.1	7.77084	1.47051	0.000997583	0.227825	Traes_3B_AECD01277.1
MSTRG.69136.3	4.78654	-5.8001	0.00100893	0.229693	Traes_6AL_F996AECD9.17
MSTRG.66671.2	21.1634	-1.57013	0.00100953	0.229693	Traes_5DL_2D156E093.2
TraesCS5B02G004400.1	11.6466	-7.0806	0.00102206	0.231677	Traes_5BS_31CD3BB2E.4
MSTRG.85951.3	152.459	-1.72961	0.00103926	0.234716	Traes_7BL_95CF78A1C.5
TraesCS5B02G526200.1	55.1456	-1.23504	0.00103965	0.234716	Traes_5BL_96E1CE27B.1
TraesCS3A02G018500.1	214.339	-1.22762	0.00104126	0.234716	Traes_3AS_7529A2159.1
MSTRG.15512.1	3.79728	3.31209	0.00105137	0.236121	Traes_6BL_C22DEC10D.7
TraesCS1D02G310100.1	52.1955	-1.72933	0.00106433	0.238113	Traes_1AL_3791A0A3A.1
TraesCS2A02G384300.1	8.24031	-1.98131	0.00107393	0.239422	Traes_2AL_490129FAB.1
MSTRG.8379.1	11.8756	-3.16305	0.00107676	0.239613	Traes_1DS_1A28F75E1.2
TraesCS6B02G249200.1	12.5111	1.04079	0.00107919	0.239667	Traes_6AL_E91F0B8F5.1
TraesCS2D02G301200.1	4.58301	1.75682	0.00108094	0.239667	Traes_2BL_0D98105B3.1
TraesCS2D02G425200.1	2.4909	-3.45889	0.00108519	0.240172	Traes_2BL_6382E3EFF.1
TraesCS1B02G164500.1	136.934	0.500025	0.00110827	0.244835	Traes_1BL_19E3557DD.1
TraesCS1B02G344400.1	16.9727	0.70957	0.00111035	0.244851	Traes_1DL_587E6E107.1
MSTRG.14963.3	1.81187	-3.72246	0.00111651	0.245764	Traes_2AL_95F48B96A.3
TraesCS1A02G037400.1	13.4839	-2.33166	0.0011287	0.24755	Traes_1AS_8B8173359.1
MSTRG.27060.1	49.8269	-3.38857	0.00113177	0.247778	Traes_3AS_F0293A3A9.5
TraesCS2B02G439500.1	3.45807	2.65146	0.00113744	0.248572	Traes_2BL_5AB5198A0.1
MSTRG.2772.2	4.96573	-3.85965	0.00114367	0.249486	Traes_1AL_7F6DF3705.5
MSTRG.21887.1	5.05721	1.32671	0.00115039	0.25032	Traes_2BL_044626FCE.1
MSTRG.14963.4	9.31049	1.14181	0.00115366	0.25032	Traes_2AL_95F48B96A.2
MSTRG.73499.2	13.5726	-7.30075	0.00116504	0.252306	Traes_6BL_860373667.2
TraesCS2B02G291400.1	7.48548	1.15158	0.00116835	0.252306	Traes_2BL_CA7E1239C.1
MSTRG.23871.4	57.9513	-0.715088	0.0011703	0.252306	Traes_2DS_40CE2D904.2
TraesCS7A02G337200.1	3.97521	1.4736	0.00117168	0.252306	Traes_7AL_B4C4AA1B1.2
TraesCS3A02G122200.2	6.03352	-4.78832	0.00117318	0.252306	Traes_3B_B0EABD401.1
TraesCS3A02G025400.1	26.068	-2.52944	0.00117937	0.252721	Traes_3DS_464DC8FC4.1
MSTRG.17246.1	4.02017	1.73779	0.00118134	0.252721	Traes_2AS_F8779F643.5
TraesCS2D02G069300.2	90.524	-0.462091	0.00118604	0.252931	Traes_2DS_C2EC0FB60.1
TraesCS3B02G463400.1	6.77664	-1.53165	0.00119695	0.254466	Traes_3B_C297FC0C2.1
MSTRG.679.2	6.47987	3.77724	0.00119785	0.254466	Traes_1AS_FC28E3C2D.1
MSTRG.93383.1	15.2145	1.71683	0.00120172	0.254842	Traes_4DL_7BB4E451B1.6
TraesCS2D02G262000.1	45.5916	-1.10356	0.00120656	0.255423	Traes_2BL_2E91C4DCF.1
TraesCS4A02G435600.1	8.32085	1.19106	0.00121102	0.255923	Traes_4AL_FCF107EEE.1
TraesCS4A02G078000.2	59.5192	-2.06194	0.00121684	0.256263	Traes_4AS_C318715F9.3
TraesCS2A02G381400.1	5.16484	1.96733	0.00122983	0.25782	Traes_2BL_39B5D5FB41.1
MSTRG.86114.5	28.7143	-2.58283	0.00123226	0.25782	Traes_7BL_4CFC83015.6
MSTRG.14099.1	16.5872	1.78022	0.00123311	0.25782	Traes_2AL_19397AC41.4
TraesCS2A02G487500.1	15.3601	-0.980725	0.00123695	0.25782	Traes_2AL_7725A4802.1
MSTRG.67008.2	19.2133	-4.04272	0.00123989	0.257825	Traes_6AS_318DA417A.3
MSTRG.87728.1	1.55742	3.55202	0.00124121	0.257825	Traes_7BL_00BDB1F64.1
MSTRG.54067.2	4.26932	-1.53548	0.00124877	0.258514	Traes_5AL_DF8BC95B3.2
MSTRG.2409.4	9.68314	-6.81471	0.00125238	0.258821	Traes_1AL_C73885878.2
TraesCS4B02G348600.1	20.3174	-1.89463	0.00126208	0.259977	Traes_4DL_03A5F7C7E.1
TraesCS3B02G007700.1	2.51233	-4.54329	0.0012663	0.259977	Traes_3B_61C43499B.8
MSTRG.86455.5	39.5468	-4.01363	0.00126652	0.259977	Traes_7BL_660FFDCE2.2
MSTRG.53832.1	3.86244	5.44981	0.00127079	0.259977	Traes_5DL_A8D42B14C.3
TraesCS4A02G487000.1	10.469	-6.27766	0.00128794	0.262603	Traes_4AL_CF95F8A58.1
MSTRG.22104.1	4.24022	2.51204	0.00131024	0.266123	Traes_2DL_8BD9DC3DF.3
MSTRG.47952.1	9.14943	-6.7344	0.00131176	0.266123	Traes_4BL_E4468CF80.24
MSTRG.45368.3	9.76075	-6.82742	0.00131915	0.266878	Traes_7DS_397385597.2
MSTRG.64435.2	2.9641	4.4942	0.00131986	0.266878	Traes_5BL_BB53F8FBB.2
TraesCS1B02G225900.1	2.33779	-4.7436	0.00132503	0.267108	Traes_1AL_579194637.1
TraesCS5D02G376100.1	16.4267	-1.17371	0.00132539	0.267108	Traes_5AL_92CB66EA3.1
TraesCS5D02G379700.1	7.00352	-1.39873	0.00133231	0.26806	Traes_5BL_7B0ED7548.2
TraesCS1A02G081200.1	17.2003	-1.1787	0.00133549	0.268255	Traes_1DS_553838359.1
TraesCS3B02G465100.2	5.58354	-6.01947	0.00134672	0.269675	Traes_3B_F61EDC1AE.1
TraesCS7A02G344600.1	112.796	-0.924753	0.00134799	0.269675	Traes_7DL_B95363AD1.2
MSTRG.51064.1	283.529	0.329585	0.00135081	0.269675	Traes_4DL_BBA5E7BFC.1
MSTRG.49118.2	82.6945	3.18445	0.00135142	0.269675	Traes_4DL_BB4D6F40A.2
TraesCSU02G177100.1	4.10927	-2.37688	0.00135744	0.270428	Traes_3B_D6FB23C95.1
TraesCS5B02G146500.1	13.1964	-1.59281	0.00136474	0.27075	Traes_5BL_12214988F.1
TraesCS4A02G046700.1	84.9991	-0.75359	0.00136571	0.27075	Traes_4AS_0C9282F0B.1
MSTRG.30960.2	2.54117	-2.48722	0.00137914	0.272968	Traes_3AL_FCD4C03D1.4
MSTRG.3089.2	2.98279	-2.33685	0.00139066	0.274356	Traes_7AL_18E841DD1.27
MSTRG.52248.5	2.89623	4.41897	0.00139292	0.274358	Traes_4DL_D7F5EDD0E.1
TraesCS7D02G351300.1	216.196	-1.5585	0.00139618	0.274557	Traes_7AL_FAE816A85.1
TraesCS5B02G230400.1	3.97589	1.41513	0.00141776	0.277915	Traes_5BL_690227A31.8
TraesCS1D02G028400.1	4.15027	-2.69502	0.00142007	0.277915	Traes_1DS_2E9ECAACA.2
MSTRG.17329.2	53.841	-0.465436	0.00142172	0.277915	Traes_2BS_019FCAD9B1.1
MSTRG.41464.1	8.87332	-6.69006	0.0014224	0.277915	Traes_4AS_89F5E01E0.1
MSTRG.81307.3	80.5148	-1.19145	0.00142661	0.278292	Traes_7AL_D93FC054C.3
TraesCS7B02G454000.1	23.1324	-3.77776	0.00143294	0.279079	Traes_7BL_717C17AD5.3
TraesCS2A02G367700.1	158.661	-1.86994	0.00144762	0.281488	Traes_2AL_6A8D574C4.1
MSTRG.69649.6	7.16355	-6.05374	0.00145824	0.282728	Traes_4AL_D92BCF8F3.5
MSTRG.38454.1	4.06012	-4.19364	0.00145879	0.282728	Traes_2DL_CF73BB43D.8
TraesCS5D02G227000.1	45.1731	-3.05943	0.0014626	0.282728	Traes_5BL_0AF583401.1
MSTRG.83384.4	12.2998	-6.5117	0.00146329	0.282728	Traes_7DS_2B4611863.2
TraesCS6A02G240400.1	5.10459	-1.64207	0.0014821	0.285909	Traes_6DL_BD842B321.1
TraesCS1A02G152500.2	28.3909	-7.75766	0.0014888	0.286294	Traes_1AL_59724705F.1
TraesCS6B02G137100.1	3.99881	-5.5437	0.00151302	0.290093	Traes_6AS_3467F4867.2
TraesCS4B02G156900.1	69.4886	0.830682	0.00151332	0.290093	Traes_4BS_E6E48BD2A.1
TraesCSU02G231800.1	2.54956	-1.92279	0.00152214	0.290412	Traes_2BL_435152104.1
TraesCSU02G228900.1	2.54956	-1.92279	0.00152214	0.290412	Traes_2BL_435152104.1
TraesCSU02G262200.1	2.54956	-1.92279	0.00152214	0.290412	Traes_2BL_435152104.1
MSTRG.1948.1	4.16411	1.88954	0.00153062	0.29086	Traes_1AL_696AA6F43.2
TraesCS1D02G124100.1	8.71828	-1.87923	0.00153124	0.29086	Traes_1DS_C1A1708F2.2
TraesCS7D02G133500.2	23.08	-1.35108	0.00153423	0.29086	Traes_3B_7036B2F0B.5
MSTRG.33691.1	3.43609	1.58715	0.00153644	0.29086	Traes_3B_D5EBFD81C.2
MSTRG.7920.1	20.5284	1.31795	0.00153928	0.290945	Traes_1BL_546DFB91B.2
TraesCS2A02G368400.1	205.849	0.686804	0.00154173	0.290957	Traes_2AL_AE7EB8419.2
MSTRG.88043.3	11.3841	-1.41652	0.00155076	0.291307	Traes_7DS_B1A1906F8.2
MSTRG.79876.2	32.702	1.32374	0.00156168	0.292906	Traes_7DS_9D0A12B6A.1
TraesCS4D02G055000.1	6.0525	-1.86957	0.00157085	0.294037	Traes_4AL_4CF27F6B1.1
MSTRG.38650.7	6.20317	-4.0655	0.001575	0.294037	Traes_3DL_7FD792470.1
TraesCS2A02G161300.1	335.569	0.59911	0.00157717	0.294037	Traes_2AS_DCACC5AF9.7
MSTRG.29415.1	126.285	0.556119	0.00158002	0.294037	Traes_3AL_8131EBAD8.1
TraesCS2A02G510000.1	8.18002	-6.57295	0.0015827	0.294037	Traes_2AL_3335311FF.4
MSTRG.16112.1	2.92672	-3.69846	0.00158277	0.294037	Traes_2AL_7FEE311BC.1
TraesCS7D02G043800.1	4.61393	-5.74759	0.00158512	0.294037	Traes_4AL_93E46AF4A.1
TraesCS7B02G065300.1	6.30803	-4.54415	0.00158763	0.294037	Traes_7DS_84D37359D.1
MSTRG.32775.2	3.75429	-4.4137	0.00159279	0.294037	Traes_3DL_E9A1D3838.10
MSTRG.69593.1	8.59939	-6.64503	0.00159294	0.294037	Traes_2BL_40EA5AA7A.4
TraesCS3A02G421400.1	2.10661	-3.5309	0.0015967	0.294037	Traes_3B_C259B70D6.1
MSTRG.9651.1	205.183	-0.710143	0.00160428	0.294841	Traes_1DL_1E92FA677.1
TraesCS4D02G118500.1	8.77435	-3.28745	0.00160591	0.294841	Traes_4DS_DBAA2CC451.2
TraesCS2B02G617600.1	22.3803	1.65401	0.00160839	0.294851	Traes_2BL_D5156A4A5.3
MSTRG.37026.4	2.18932	4.62774	0.00161878	0.295984	Traes_3B_7B43CE202.7
MSTRG.88380.2	8.56181	-1.2315	0.00161943	0.295984	Traes_7AS_64449CE5F.1
TraesCS3D02G163100.3	4.20672	-5.60693	0.00162793	0.296641	Traes_3B_AB083F650.3
MSTRG.45412.1	52.1521	-3.38358	0.00163034	0.296641	Traes_4AL_C04AC0228.8
MSTRG.22056.1	14.2612	2.19825	0.0016341	0.296883	Traes_2BL_1C4F9F9F8.1
TraesCS6A02G122100.1	3.83781	-1.7844	0.00164679	0.298297	Traes_6AS_706F252FA.1
TraesCS3A02G012700.1	3.36851	-4.27763	0.0016765	0.303227	Traes_3B_ADCF93AE0.9
TraesCS7A02G157000.1	52.917	0.555085	0.00170477	0.307426	Traes_7DS_2C0B0D061.1
TraesCS1D02G400000.1	13.9756	-1.36175	0.00172071	0.308647	Traes_1AL_9022E66BC.2
TraesCS7D02G203900.1	105.153	-0.661362	0.00172115	0.308647	Traes_7DS_A088D07E7.1
TraesCS1D02G363400.1	10.396	-1.80909	0.00172168	0.308647	Traes_1BL_49B98A4F3.2
TraesCS2A02G389200.2	3.28588	-2.4775	0.00172943	0.309144	Traes_2AL_9E68ABA72.4
TraesCS2D02G537700.4	2.99286	-5.1218	0.00172953	0.309144	Traes_2AL_4E6969489.2
TraesCS7D02G539500.1	15.5844	-1.57107	0.00173852	0.310296	Traes_5BL_1C01FBFC1.1
MSTRG.23620.4	105.596	0.411022	0.00174643	0.310833	Traes_2BS_93E49A2FF.1
MSTRG.8916.1	9.58494	-1.71391	0.00174664	0.310833	Traes_6DS_14693D23C.1
MSTRG.87618.4	18.6519	1.64379	0.001753	0.31151	Traes_7DL_4F62353EC.4
MSTRG.6045.2	527.091	-1.40824	0.00175678	0.31169	Traes_1AL_E96C0662D.1
TraesCS4A02G056200.3	37.5585	6.72594	0.00175914	0.31169	Traes_4BL_F8C1990BA.1
TraesCS5A02G373500.1	7.41663	1.27645	0.00177266	0.313629	Traes_5DL_7F3ABFDD6.4
MSTRG.82720.9	8.70244	-4.87027	0.00177825	0.314162	Traes_7AL_3665A263E.1
MSTRG.329.5	10.691	-1.57587	0.00178263	0.31448	Traes_1DS_BEDDBBC36.5
MSTRG.83384.9	7.79633	-6.50404	0.00180006	0.316686	Traes_7DS_2B4611863.2
TraesCS4B02G220200.1	42.8245	-1.44129	0.00180034	0.316686	Traes_4DL_D7237EFB9.3
MSTRG.37292.1	7.53657	-6.4552	0.00180727	0.317113	Traes_3AS_34057A336.2
TraesCS5D02G337400.1	109.884	0.436363	0.00180798	0.317113	Traes_5DL_23362968A.1
MSTRG.86398.1	156.43	-0.695727	0.00181118	0.317217	Traes_7DL_DF8D467AA.7
TraesCS7B02G455700.1	14.8835	-4.84997	0.00182431	0.317947	Traes_7AL_115502549.2
TraesCS4A02G165700.1	2.79964	2.66952	0.00182791	0.317947	Traes_4AL_A1480F9DF.1
MSTRG.86667.4	3.77132	-2.81776	0.00183057	0.317947	Traes_7BL_B91111BD7.1
TraesCS7D02G219400.1	79.7951	0.824172	0.00183175	0.317947	Traes_7DS_4CE1A25EF.1
TraesCS7B02G116700.1	10.827	-1.67416	0.0018342	0.317947	Traes_7BS_E3BDDBFEF.1
MSTRG.45365.2	23.4841	-5.91575	0.00183875	0.317947	Traes_4AL_CD13F08C8.1
MSTRG.90663.1	4.58839	1.52578	0.00183941	0.317947	Traes_7DL_287C054DC.8
TraesCS2A02G504100.1	2.51558	-3.40934	0.00184434	0.317955	Traes_2AL_AA7B368D3.1
TraesCS1D02G286900.1	3.05456	3.61738	0.00184977	0.317955	Traes_1DL_8C98D191A.1
MSTRG.78352.3	92.4419	-2.10606	0.00185394	0.317955	Traes_6DL_5EF8EAD26.1
TraesCS3D02G318600.1	2.85974	-2.09684	0.00187046	0.319817	Traes_3B_8ACDBBE56.1
MSTRG.1548.1	21.1025	-2.6184	0.00187069	0.319817	Traes_6AS_4D5D2542D.1
MSTRG.84753.8	3.58175	-5.37372	0.00187793	0.320384	Traes_2BL_A61DD929F.20
MSTRG.41888.2	8.94637	-2.57353	0.00187927	0.320384	Traes_4AS_A3EAF8C80.1
TraesCS4D02G216900.1	31.1059	0.629182	0.00188274	0.320526	Traes_4BL_D2E80031E.2
TraesCS4A02G196400.1	15.7769	-1.14585	0.00188588	0.320612	Traes_4AL_DF55853C2.2
MSTRG.12282.2	32.3113	3.61453	0.00189362	0.32148	Traes_2AS_3478D9D66.1
TraesCS4D02G325600.1	2.06605	-4.22958	0.00189659	0.321536	Traes_5AL_9AA8A9036.1
TraesCS2A02G083700.1	13.9738	-1.29435	0.00191317	0.32317	Traes_2AS_E92C7ABDF.1
MSTRG.60194.3	4.85971	-1.37483	0.00191419	0.32317	Traes_5BL_A448C81F0.2
TraesCS4B02G323300.1	16.5015	1.21107	0.0019242	0.324374	Traes_4DL_8A9D9ACCB.1
TraesCS1D02G145100.1	120.01	0.452662	0.00193451	0.324448	Traes_1BL_19E3557DD.1
MSTRG.1767.4	6.87289	-5.31305	0.00193506	0.324448	Traes_1DL_EEBABD782.3
MSTRG.28122.1	4.19441	-5.27617	0.0019469	0.325843	Traes_2DL_0D29B7C6B.1
TraesCS3B02G353900.1	3.43366	-5.3176	0.00194877	0.325843	Traes_3AL_B27F0D4FF.1
TraesCS6A02G415931.1	7.21905	1.23452	0.00195165	0.325877	Traes_6DL_D764400441.2
TraesCS2B02G463100.2	6.73682	-1.05181	0.00195755	0.326415	Traes_2BL_C3040D730.1
MSTRG.45679.1	1.75995	-3.97447	0.00196739	0.326957	Traes_1AL_3EDE368EB.1
TraesCS5A02G326300.4	9.69583	-1.41415	0.00196886	0.326957	Traes_5BL_5A648D29D.1
TraesCS3D02G478000.1	2334.35	-1.23257	0.00198837	0.329748	Traes_3B_9F3320C78.1
MSTRG.9933.9	7.90342	-4.39667	0.00200245	0.331621	Traes_1DL_EEBABD782.7
MSTRG.65720.2	2.14957	-2.60411	0.00200575	0.331621	Traes_3DL_EEDF7A283.1
MSTRG.6590.2	15.9584	-1.41452	0.00200784	0.331621	Traes_1BL_4AEEEBFFA.2
MSTRG.43305.4	8.77572	-6.67017	0.00202357	0.332712	Traes_4DS_95156451B.1
MSTRG.61790.4	3.0235	-5.14781	0.00203259	0.332712	Traes_5BL_69A0036EA.1
MSTRG.28306.2	159.715	0.275668	0.0020331	0.332712	Traes_3B_B95EC2804.1
TraesCS2A02G363600.1	1576.52	-1.12675	0.00203354	0.332712	Traes_2AL_21B8BCA9C.2
MSTRG.45253.2	7.08184	-6.36554	0.00203358	0.332712	Traes_7AS_643102EBE.1
MSTRG.23629.2	32.9668	1.24051	0.00204416	0.332888	Traes_2DS_A71BAD6B6.3
MSTRG.30635.2	8.21032	-6.57776	0.00204517	0.332888	Traes_3B_A7F590466.4
TraesCS3B02G225000.2	12.0627	-0.846749	0.0020464	0.332888	Traes_3B_0C6F027E8.2
TraesCS3B02G271800.1	144.257	0.388116	0.00205303	0.332888	Traes_3B_FFA902DFC.2
MSTRG.70459.2	23.0674	0.749919	0.00205374	0.332888	Traes_6AL_51D8375EF.1
TraesCS6D02G369600.1	5.01234	-2.16869	0.0020538	0.332888	Traes_6DL_1EC4A77EE.3
TraesCS3B02G073700.2	3.84663	4.71998	0.00207095	0.335222	Traes_3B_1D7FCE7C8.7
TraesCS2A02G161700.1	4.1716	-2.04652	0.00207819	0.33524	Traes_2DS_E754729E5.1
TraesCS3A02G225100.1	5.37029	-1.64857	0.00208313	0.33524	Traes_3B_F6D9A9AEE.1
MSTRG.8835.3	192.008	-0.792718	0.00208348	0.33524	Traes_1DS_830C4AC55.2
MSTRG.47410.1	34.5893	1.27786	0.00208633	0.33524	Traes_4DL_7BB4E451B1.6
MSTRG.69884.1	2.35915	4.10494	0.00208759	0.33524	Traes_3B_1396EA938.6
MSTRG.16433.3	7.52139	-2.7877	0.00209273	0.335622	Traes_6DL_BC96FBEE2.3
TraesCS7D02G440000.1	12.4937	-1.32815	0.00209729	0.335912	Traes_7DL_57C54F1BB.2
MSTRG.56018.1	15.7831	-1.67942	0.00212108	0.338831	Traes_5AL_BDC9E2142.3
TraesCS3A02G079900.2	160.049	-0.887488	0.00214495	0.3413	Traes_3AS_4E4F1CA3D.2
TraesCS1D02G207100.1	458.512	-1.39747	0.00215708	0.342668	Traes_1DL_95936DC50.1
MSTRG.23215.2	25.3608	-1.1046	0.00215918	0.342668	Traes_2DS_78D9A3898.1
TraesCS6B02G331600.1	24.429	-0.899526	0.00216468	0.343093	Traes_6AL_7CCBA3120.1
MSTRG.77846.3	2.18701	4.63522	0.00217049	0.343567	Traes_6AL_C32124038.2
MSTRG.54308.5	2.86164	-3.66963	0.00217401	0.343677	Traes_5DL_CEDABCD95.8
TraesCS6A02G065400.2	26.9716	-2.48574	0.00219259	0.345135	Traes_6AS_3FF5D06F5.3
MSTRG.9225.3	10.5583	-2.52396	0.00219966	0.345241	Traes_1DS_7BD8D52FD.1
MSTRG.32894.1	6.16708	-2.96617	0.00220092	0.345241	Traes_3B_6ECC5482A.12
MSTRG.39011.7	10.7512	1.34556	0.00220542	0.345419	Traes_3DL_D4D097967.9
MSTRG.22030.2	35.4381	-1.95577	0.00221057	0.345419	Traes_2AL_40C13C199.1
MSTRG.37956.2	19.2313	-1.9711	0.00222734	0.347149	Traes_6DL_461005316.17
TraesCS3A02G522300.1	7.15552	-1.80386	0.00224378	0.349264	Traes_3AL_A8B1CC357.1
TraesCS5A02G084900.1	19.5108	0.877375	0.00226061	0.350447	Traes_5DS_A81FAF5FC.1
MSTRG.87453.3	12.2629	-1.83131	0.00226307	0.350447	Traes_7BL_FF48B06EB.6
TraesCS1B02G020300.1	30.4739	-2.14732	0.00226308	0.350447	Traes_1BS_C86C7CAF3.2
TraesCS6A02G282000.3	5.59019	3.41287	0.00226951	0.350447	Traes_6AL_C640DBC9E.4
MSTRG.67882.1	14.6962	-1.48088	0.00227116	0.350447	Traes_7DS_794AEF142.1
TraesCS2D02G226000.2	10.0439	-1.25624	0.00227765	0.350447	Traes_2DS_FCCFA0BE1.3
TraesCS1B02G128300.1	8.62273	1.29326	0.00227789	0.350447	Traes_1BS_F348B884F.3
MSTRG.37038.1	22.5341	1.63432	0.00228235	0.350447	Traes_3DS_3847F8C23.1
TraesCS7A02G433300.1	12.0601	1.48985	0.00228305	0.350447	Traes_7AL_04AC707A6.2
MSTRG.1384.4	7.50227	-6.4472	0.00228785	0.350642	Traes_5BL_5CFD958FC.5
TraesCS2A02G005100.1	218.034	-0.778451	0.00229344	0.350715	Traes_2DS_1E5EB2757.1
TraesCS6A02G004600.1	80.0495	-0.628926	0.00231701	0.353875	Traes_6AS_B9DF5ACD8.1
MSTRG.37142.3	4.05448	2.88836	0.00232332	0.354394	Traes_3B_F3DBA2600.2
MSTRG.80689.4	10.0683	-1.92462	0.00234547	0.356658	Traes_5AL_31CDB68F2.1
MSTRG.15295.4	46.7619	-3.96151	0.00234695	0.356658	Traes_3B_836F0BC3F.9
MSTRG.49373.1	10.3032	1.05921	0.00237878	0.360402	Traes_4BL_E2397195B.1
MSTRG.7131.6	17.7152	-7.03848	0.00238516	0.360402	Traes_1BL_03512FE8C.3
TraesCS2D02G364500.1	26.0242	-2.53679	0.002386	0.360402	Traes_2DL_00618F315.1
TraesCS2D02G303100.1	68.9892	0.557761	0.0023864	0.360402	Traes_2DL_49F25C5EC.2
TraesCS1D02G149800.1	901.383	-1.4917	0.0023963	0.36117	Traes_1DL_BFD641AD9.1
MSTRG.55099.5	40.655	1.09724	0.00240557	0.36117	Traes_5AL_0D4BDDDCD.3
TraesCS1B02G252100.2	6.66555	-6.27718	0.0024061	0.36117	Traes_1AL_0B1B6775E.1
MSTRG.85374.1	20.4365	0.764018	0.00240631	0.36117	Traes_7AL_998B83B66.2
MSTRG.14760.6	16.6886	-1.25584	0.00241226	0.361616	Traes_2DL_0AF2FB2F8.2
TraesCS3A02G304800.1	29.4687	0.5641	0.00241932	0.362228	Traes_3B_3DADBA71C.1
MSTRG.34248.1	4.85953	-5.1547	0.00243858	0.363898	Traes_3B_6D9096FA7.1
MSTRG.18246.1	104.837	-0.689147	0.00244178	0.363898	Traes_2BS_8C45FF74E.1
MSTRG.47343.1	15.3493	-1.02349	0.00244385	0.363898	Traes_6DS_3A1A8BCAC.5
MSTRG.25943.2	4.66654	-5.08875	0.00244542	0.363898	Traes_2DL_608736C38.1
MSTRG.71761.1	1.28915	3.1801	0.00245421	0.364495	Traes_6DS_B81554DFA.1
TraesCS4B02G070000.1	5.76103	-2.31438	0.0024579	0.364495	Traes_4BS_5D683AEC1.2
MSTRG.77977.1	6.47745	-1.21751	0.00245841	0.364495	Traes_6BL_28CC2BD8E.11
MSTRG.15475.2	9.17777	-1.30671	0.00246296	0.364725	Traes_2AL_490129FAB.2
MSTRG.35157.2	4.1349	-3.72886	0.00247883	0.366184	Traes_3B_D6A0E4AB0.2
TraesCS6D02G086600.1	19.4208	-1.46962	0.00248806	0.367102	Traes_6DS_BDFEA01CE.1
MSTRG.87494.2	5.96432	-2.36902	0.00249357	0.36747	Traes_6DL_9010B3104.1
TraesCS5D02G159100.1	5.35486	-3.3764	0.0025058	0.368825	Traes_5DL_70E5AA8DF.1
MSTRG.43448.2	49.175	-2.17275	0.0025206	0.370456	Traes_4AL_96EF1A5FF.1
TraesCS5D02G193200.1	8.15053	1.06793	0.00252296	0.370456	Traes_5DL_167F3C3CA.1
MSTRG.69868.3	2.09567	3.03408	0.00254293	0.372846	Traes_6DS_08083F768.3
MSTRG.15295.1	16.6162	3.23521	0.00255014	0.372846	Traes_3DL_6CC9B9403.3
TraesCS5B02G535500.1	2.5913	4.87466	0.00255149	0.372846	Traes_5BL_0A245D856.1
TraesCS2A02G410500.1	4.30935	5.01403	0.00255905	0.373348	Traes_2AL_44F7248E4.1
TraesCS4A02G075600.1	10.0346	-1.21555	0.00256733	0.373348	Traes_4AS_ED8D7EE94.1
MSTRG.92300.1	6.10761	-1.6534	0.00256961	0.373348	Traes_7DL_83CA11157.1
TraesCS4A02G174100.1	177.748	0.638835	0.00257026	0.373348	Traes_4DS_276818E4F.1
MSTRG.11814.3	30.2333	1.5275	0.00258173	0.374566	Traes_1AL_834747574.5
TraesCS3D02G024700.1	3.05535	-3.2366	0.00258914	0.37488	Traes_3B_17E92C1EA.1
TraesCS1B02G267900.1	2.2007	-3.23528	0.00259005	0.37488	Traes_1AL_6163070BD.1
TraesCS4B02G312300.1	37.06	-1.14015	0.00259607	0.375304	Traes_4BL_9CDB177D0.1
MSTRG.54452.2	4.85345	5.78286	0.00259922	0.375314	Traes_6BL_4C5D70E60.24
TraesCS2A02G455600.1	1.99891	-2.28776	0.00260367	0.375511	Traes_2BL_227555978.1
TraesCS4B02G173300.1	48.2474	-0.463665	0.00261517	0.376724	Traes_4AS_1B92A6B36.1
TraesCS3D02G478200.1	108.258	-1.30885	0.00262213	0.376834	Traes_3B_766459852.1
TraesCS7D02G494400.1	121.273	0.409935	0.00263662	0.378242	Traes_6AS_AC660D693.4
MSTRG.12895.1	2.59746	-4.55661	0.00264103	0.378242	Traes_2AS_87D72429B.1
TraesCS4B02G221100.1	29.878	0.907785	0.0026429	0.378242	Traes_4DL_B84BC09CF.1
MSTRG.45389.1	2.7644	-4.66976	0.00264435	0.378242	Traes_6BS_43649D0E4.2
TraesCS5D02G334500.2	17.7732	-1.1533	0.00265741	0.379218	Traes_5BL_FB94A02FE.1
TraesCS2A02G158700.1	2.03098	-3.07612	0.00267363	0.380819	Traes_2AS_D5CD0FD7B.1
TraesCS4A02G134300.2	148.245	-0.836313	0.00267489	0.380819	Traes_4AS_E2E0BF011.2
MSTRG.9996.1	30.808	-0.479208	0.00268767	0.382192	Traes_1AL_A69755144.1
TraesCS3A02G458000.1	21.1085	-1.44452	0.00269412	0.382271	Traes_3AL_E2FE1DC94.2
MSTRG.74365.1	50.7702	1.10844	0.0026945	0.382271	Traes_6AL_9E54AE54E.1
TraesCS6D02G054800.1	4.53994	-1.97266	0.00270679	0.38285	Traes_6AS_5BAD56BB6.1
MSTRG.78781.1	6.06837	-6.14317	0.00270802	0.38285	Traes_4AL_73CEB0A2F.1
MSTRG.11906.2	7.87592	-1.46934	0.00273834	0.386687	Traes_1DL_A27FD4F7F.1
TraesCS5A02G017900.1	274.535	-1.51399	0.0027426	0.38684	Traes_5BS_94EB99BCB.1
TraesCS1D02G215100.1	5.2125	-3.25443	0.00277007	0.390172	Traes_1BL_E2B0DED6A.1
TraesCS3A02G483100.1	204.092	-1.53739	0.00277294	0.390172	Traes_3B_766459852.1
MSTRG.87545.1	6.00688	-6.12869	0.00277584	0.390172	Traes_7AS_300D88FD5.3
MSTRG.15384.3	3.46717	-2.86337	0.00278246	0.390651	Traes_2AL_4D75CEE491.5
TraesCS7D02G488300.1	3.55186	1.36122	0.00279754	0.390718	Traes_7DL_DD3E13ED3.2
TraesCS3A02G021900.1	1.67665	-3.92206	0.00280212	0.390718	Traes_3B_17E92C1EA.1
TraesCS5A02G400800.1	2.68685	1.54198	0.00280531	0.390718	Traes_5AL_3BCA037DC.1
MSTRG.44641.1	12.7062	0.838969	0.00280743	0.390718	Traes_7DS_C32A14714.2
TraesCS3D02G063100.1	4.55188	5.69009	0.00281182	0.390718	Traes_3DS_F69F9A2C2.1
TraesCSU02G045000.1	13.1905	-1.77035	0.00283543	0.392654	Traes_3AS_1D618944D.2
TraesCS2A02G211200.11	23.123	-0.750249	0.00284405	0.393399	Traes_2AS_0F1E87E4E.8
MSTRG.93586.1	34.2442	-5.1226	0.00285587	0.394519	Traes_3B_5500D69F3.1
TraesCS1D02G353800.1	54.1	-0.940987	0.00286554	0.394579	Traes_1AL_11AF18375.2
TraesCS6B02G258600.1	18.2965	-1.3581	0.00287293	0.394808	Traes_6BL_C96F626D9.1
TraesCS1B02G126300.2	5.29428	-4.9555	0.00287674	0.394808	Traes_1BS_CC1B13C13.1
TraesCS6D02G212500.1	2.77305	-2.40074	0.00287694	0.394808	Traes_6DL_04CD7E82C.1
TraesCS2B02G326200.1	16.4004	-0.996945	0.00289149	0.396324	Traes_2BL_C41ED2148.1
TraesCS2D02G348800.1	265.389	-1.26003	0.00290038	0.396684	Traes_2DL_1CB540BCC.4
TraesCS3D02G223900.1	2.19966	-3.26215	0.00291314	0.397536	Traes_3DL_7D8E5D381.2
TraesCS2D02G175700.1	111.855	0.441906	0.00292331	0.398477	Traes_2AS_3F458D2CF.1
MSTRG.28984.2	21.5732	-2.44382	0.00293242	0.399182	Traes_3B_A685BC3F7.1
MSTRG.1521.3	8.17234	3.91351	0.00293504	0.399182	Traes_1DL_DC18AFC11.2
TraesCS2A02G305200.1	18.7315	0.713372	0.00294636	0.399909	Traes_2AL_74A40A486.2
MSTRG.42027.4	77.0187	-0.992648	0.00296215	0.400991	Traes_4AS_060E22DA0.3
TraesCS4D02G298100.1	113.958	0.362649	0.00296482	0.400991	Traes_4DL_EAF90696F.1
MSTRG.11242.1	9.71742	1.9801	0.00297107	0.401222	Traes_1DL_A4D8B7FA8.1
TraesCS2A02G335100.1	7.43035	1.16772	0.00297312	0.401222	Traes_2BL_A3C90B54E.1
MSTRG.11313.2	1.86443	-3.35782	0.00298281	0.402085	Traes_1DL_0DF53C55A.2
TraesCS6D02G310500.1	6.10352	-2.35547	0.00298909	0.402486	Traes_6AL_AE7EF8E87.1
MSTRG.83376.2	4.5033	-4.71794	0.00299248	0.402497	Traes_7DS_578765829.2
TraesCS4B02G168400.1	10.2456	-1.8998	0.00300295	0.403015	Traes_4AS_AF4D76704.1
TraesCS7B02G417700.1	371.798	-1.92648	0.00300846	0.40331	Traes_5BS_B07DC23E2.1
TraesCS2D02G204700.1	34.4489	-1.18285	0.00301444	0.403667	Traes_2DS_28CA50371.3
MSTRG.29936.1	4.80861	-2.26444	0.00302424	0.404533	Traes_3AL_EB7142B35.5
TraesCS3A02G157200.4	5.29066	-5.59659	0.00302861	0.404674	Traes_3DS_65349138C.2
TraesCS4B02G322800.1	1.80717	-3.65779	0.00303544	0.405083	Traes_4BL_8FD2DD629.1
TraesCS7D02G477500.2	104.286	-0.524489	0.00303833	0.405083	Traes_7AL_F0E04F6F0.1
TraesCS3A02G056500.1	3.55913	-2.86893	0.00305083	0.405861	Traes_3AS_35E1BE43B.1
TraesCS6A02G274200.1	69.7356	-0.435777	0.00305573	0.406069	Traes_6DL_BD49C3B26.1
TraesCS7A02G217700.1	18.298	1.4923	0.0030724	0.407636	Traes_7DS_4CE1A25EF.1
MSTRG.30640.3	5.47564	-1.73262	0.00307422	0.407636	Traes_3B_791B0D12F.1
MSTRG.16433.1	5.63419	-5.03945	0.0030815	0.408156	Traes_6BL_D26547564.4
TraesCS4A02G116400.1	34.8178	-1.13496	0.00309016	0.408221	Traes_4AS_C5AE1BBDD.1
MSTRG.38919.3	6.07273	1.72855	0.00309389	0.408221	Traes_3DL_593121986.3
MSTRG.20049.2	8.27229	-4.81639	0.00309435	0.408221	Traes_2BL_281306FE9.5
TraesCS3B02G179500.1	25.6952	-0.750431	0.00311771	0.409891	Traes_3B_14B50EB49.3
MSTRG.25813.3	152.232	0.413828	0.00312004	0.409891	Traes_2DL_8A52AFA08.2
TraesCS5A02G327900.1	7.46433	-2.09901	0.00312153	0.409891	Traes_5DL_9E028D04A.2
MSTRG.48209.4	7.04802	-1.61422	0.00315341	0.41354	Traes_3DL_C22D418C3.7
TraesCS5B02G152600.1	3.20306	-5.22355	0.00315612	0.41354	Traes_5DL_70E5AA8DF.1
TraesCS1B02G204700.1	9.89733	-0.861977	0.0031604	0.413655	Traes_1DL_CA3D844E5.1
TraesCS7D02G225700.1	55.37	1.09216	0.00317414	0.414616	Traes_7DS_D7903AFB0.4
TraesCS7D02G365000.1	2.85076	-2.66189	0.00317455	0.414616	Traes_7DL_F03D29070.2
MSTRG.27096.1	2.92066	-2.72897	0.00317926	0.414697	Traes_4BL_37745F287.1
TraesCS7B02G008800.2	3.52692	-3.09882	0.00318198	0.414697	Traes_7AS_D116D27221.3
TraesCS5B02G275300.1	25.3273	0.615441	0.00318976	0.415266	Traes_5BL_99AB709F2.1
TraesCS1D02G151500.1	28.3731	-0.698447	0.00319662	0.415714	Traes_1DL_A6191043C.1
TraesCS1D02G036900.1	60.9261	-0.984179	0.00320275	0.416067	Traes_1AS_CFFF0EB8B.1
TraesCS2D02G174400.1	1.95781	3.82457	0.0032226	0.418199	Traes_2DS_88D21F26A.9
TraesCS7B02G241900.1	18.4689	-1.20609	0.00323756	0.419694	Traes_7BL_4325CDC9F.1
TraesCS6B02G256900.1	49.1039	0.77826	0.00324903	0.419884	Traes_6BL_62CC48C2C.1
MSTRG.60688.1	26.6456	-0.829432	0.00326411	0.420823	Traes_5AL_2D3E5EF9B.1
TraesCS3B02G182700.1	42.1108	0.604463	0.00326437	0.420823	Traes_3B_77896B28B.1
MSTRG.3497.2	24.4403	-1.01969	0.00327023	0.420823	Traes_2AL_563E4E901.1
MSTRG.87787.1	6.04789	-6.13702	0.00327047	0.420823	Traes_7BL_6D5EA3AF9.4
TraesCS2D02G122500.1	1.9418	-3.49793	0.00327866	0.420886	Traes_2DS_F5C7BB2A5.1
TraesCS7A02G271500.2	17.4902	-7.66727	0.0032848	0.420886	Traes_7DS_699729355.1
TraesCS3A02G136100.1	28.095	-1.63371	0.0033044	0.422874	Traes_3B_D4262248A.1
MSTRG.79777.2	447.778	-1.22395	0.00330933	0.422874	Traes_7AS_2742DDF6C.4
TraesCS2A02G106500.1	29.6154	1.47814	0.00331073	0.422874	Traes_2BS_6A7A2DE84.1
MSTRG.29724.3	5.15681	5.30392	0.00331715	0.42325	Traes_3AL_627510E36.1
MSTRG.67417.1	3.85344	2.56698	0.00333706	0.424505	Traes_1BL_4B1CFEF1C.3
MSTRG.44172.1	12.6855	-1.84032	0.00333881	0.424505	Traes_4AL_CC989B4A5.1
TraesCS4B02G196600.1	86.8872	0.514097	0.00334094	0.424505	Traes_4BL_A56D87178.2
MSTRG.83380.7	3.08617	-3.83657	0.00335551	0.425858	Traes_7BS_3974582E7.9
MSTRG.34388.3	8.65597	2.09971	0.00338393	0.428378	Traes_3B_4F07D0F7E.8
MSTRG.30307.4	3.1224	3.86274	0.00338774	0.428378	Traes_3B_BF8560FF1.1
MSTRG.76614.7	2.63086	-4.94273	0.00340345	0.428378	Traes_6DS_BEE6220D9.1
TraesCS6B02G031600.2	2.78305	-2.60541	0.0034042	0.428378	Traes_6DS_B8F70E63B.2
TraesCS7D02G183500.1	39.4303	0.815356	0.00340811	0.428378	Traes_7AS_606ACFE0C.1
TraesCS3B02G457900.1	67.4146	0.552532	0.00340885	0.428378	Traes_3B_23724F703.3
TraesCS1A02G377900.1	3.26334	-1.48185	0.00341144	0.428378	Traes_1BL_2135FE01E.1
TraesCS7D02G239500.1	11.3792	-0.875822	0.003419	0.428378	Traes_7AS_49CD90B241.2
TraesCS2A02G442300.1	4.70467	-2.67978	0.00342473	0.428443	Traes_2AL_EBF9BF3E7.2
MSTRG.12593.1	11.7438	1.74029	0.00345026	0.430752	Traes_7BS_4985F31A71.1
TraesCS3A02G225800.1	5.7718	-2.71911	0.00346209	0.431786	Traes_3DL_7D8E5D381.2
TraesCS1D02G266200.1	4.88949	-1.69908	0.00346688	0.43194	Traes_1AL_ADC801BEB.1
TraesCS2D02G562200.1	1.5566	-2.70193	0.00351539	0.436259	Traes_2DL_F77154DE5.2
MSTRG.57724.2	10.5302	1.10481	0.00351546	0.436259	Traes_5BS_82C1084B0.6
TraesCS5D02G046300.1	1.36779	-3.28098	0.00351573	0.436259	Traes_5DS_73606D85A.1
TraesCS2A02G253700.1	13.0778	0.750518	0.00351703	0.436259	Traes_2AL_AC3FC0869.1
MSTRG.70367.2	13.1078	-3.13679	0.00351946	0.436259	Traes_6DL_461005316.7
TraesCSU02G039600.1	4.3363	-5.32575	0.00353767	0.437204	Traes_3B_3EE0459B4.1
TraesCS3D02G188000.1	3.60957	-3.12931	0.00354159	0.437204	Traes_3B_D6E12C0A1.1
TraesCS6A02G321300.1	1.76017	-3.25836	0.00354457	0.437204	Traes_6AL_7811FFF66.1
TraesCS3B02G181300.1	2.52482	-3.4813	0.00354504	0.437204	Traes_3B_BA15EB5E9.1
TraesCS7B02G207000.3	5.92818	-6.10691	0.00354999	0.437371	Traes_7AL_8354C26D1.1
TraesCS3B02G549200.1	43.8019	-2.49388	0.0035616	0.437924	Traes_3B_A9EBAAAD4.1
MSTRG.54892.3	13.4534	1.0312	0.00356862	0.437944	Traes_5AL_BC0E24010.2
MSTRG.3045.11	13.9211	-2.80516	0.00356903	0.437944	Traes_1AL_64366944B.15
TraesCS2A02G166900.1	13.1048	0.716024	0.00358099	0.438968	Traes_2AS_FE37D420B.1
TraesCS6A02G126900.1	2.246	1.98588	0.00359891	0.440721	Traes_6AS_DA87680EB1.8
MSTRG.25487.2	6.2272	0.985007	0.00360677	0.440799	Traes_2DL_2CAFF52C8.1
MSTRG.25584.1	31.2527	-1.1225	0.00360679	0.440799	Traes_2BL_4A1181B731.2
TraesCS5A02G261900.1	72.3546	0.46914	0.00361839	0.44139	Traes_5BL_2748468D7.1
TraesCS5B02G516000.1	106.597	-1.15368	0.00361887	0.44139	Traes_5BL_EC508841D.1
MSTRG.58387.7	3.65763	5.37416	0.00362631	0.441854	Traes_5AS_E2C5A9DF3.4
MSTRG.21162.2	1.7732	-2.64738	0.00363401	0.442349	Traes_2BL_3C2184ED4.5
MSTRG.63729.2	47.7887	1.24186	0.00364939	0.442553	Traes_5DL_27EBF2358.4
MSTRG.3132.1	158.454	-0.754229	0.0036497	0.442553	Traes_1AL_197423E8E.1
TraesCSU02G008100.1	6.01693	2.33783	0.00365375	0.442553	Traes_2AS_09E707C65.2
MSTRG.2921.1	3.8858	1.48702	0.00365386	0.442553	Traes_3DS_757A9F6B9.1
MSTRG.77973.2	1.56039	3.2063	0.00366033	0.442721	Traes_6DL_D8B55F1A3.1
MSTRG.90359.2	32.9994	-0.724656	0.00366252	0.442721	Traes_7DL_1A847FDCC.1
TraesCS4A02G489700.1	10.8156	-3.11182	0.00369443	0.445693	Traes_4AL_D373DA13E.2
MSTRG.88937.2	13.8483	-1.84931	0.00371305	0.447053	Traes_7BS_259FD8B7C.1
MSTRG.69649.4	5.36651	-5.96538	0.00371792	0.447197	Traes_4AL_D92BCF8F3.5
MSTRG.7919.2	19.2947	1.34994	0.00376501	0.451968	Traes_1BL_546DFB91B.1
MSTRG.18235.1	2.02441	2.17674	0.0037834	0.452392	Traes_2DS_9993A5116.2
TraesCS2A02G215100.2	2.78053	-2.90601	0.00379628	0.453041	Traes_2AS_61CA61AD3.1
TraesCS1A02G015200.2	3.65791	2.63966	0.00381121	0.453933	Traes_1AS_0D320EF1F.3
MSTRG.64009.4	2.25843	4.09673	0.00382502	0.454885	Traes_5BL_BB8D76E7B.11
MSTRG.58076.3	5.30711	-4.61129	0.00382682	0.454885	Traes_5BS_43474D974.4
MSTRG.16433.2	10.2582	-5.9232	0.00383041	0.454885	Traes_6BL_D26547564.4
MSTRG.82273.2	7.49271	-1.46019	0.00383918	0.455481	Traes_7DL_32DDF297F.3
TraesCS5B02G233700.1	182.186	-0.53655	0.0038443	0.455644	Traes_5BL_8C17DD1C4.1
MSTRG.27154.2	36.8171	-1.25858	0.00385979	0.456407	Traes_3B_307E3AE1C.1
TraesCS4D02G194100.1	12.3943	-1.29613	0.00386432	0.456407	Traes_4AS_F3347C96F.2
TraesCS1B02G324300.2	22.8832	-0.799194	0.00387092	0.456407	Traes_1BL_C81B12EC9.3
TraesCS3A02G327700.1	14.3304	1.25158	0.00387835	0.456407	Traes_3DL_A17930988.1
MSTRG.41101.1	19.2816	-1.51269	0.00387847	0.456407	Traes_3DL_1DA454A9F.1
MSTRG.66668.3	6.02586	-2.69375	0.00387966	0.456407	Traes_4AL_045FB8710.4
MSTRG.68491.4	16.7785	-1.39951	0.00388072	0.456407	Traes_6AS_867A17B5B.6
TraesCS7D02G262500.2	4.50271	5.67395	0.00388993	0.457048	Traes_7DS_989147E2F.1
TraesCS1D02G020800.1	6.33365	-2.12442	0.00390506	0.458384	Traes_1AS_87BBA62F4.2
TraesCS1A02G210400.1	8.62984	1.23202	0.00393485	0.460991	Traes_1AL_68FA687CC.1
TraesCS1A02G427400.1	3.71696	-2.57107	0.00394344	0.461554	Traes_1AL_8877426FB.1
MSTRG.93020.1	4.7377	-4.78706	0.0039502	0.4619	Traes_7DL_AC271F4EE.3
MSTRG.46574.1	54.6121	-1.86915	0.00395845	0.461977	Traes_4BS_47C0E033A.3
TraesCS1B02G356200.1	48.848	-1.17536	0.0039658	0.462392	Traes_1BL_9FCB31A4D.1
MSTRG.47968.2	33.2952	0.708357	0.00397437	0.462504	Traes_4AS_745A8385E.2
TraesCS2D02G252400.1	23.2693	-0.91943	0.00399789	0.464172	Traes_2AL_E7D1C8AA5.2
MSTRG.83375.2	5.20207	-3.27918	0.00400395	0.464172	Traes_7AS_D116D27221.3
TraesCS2B02G582000.1	7.4899	-2.61942	0.00401126	0.464398	Traes_2BL_5FF85C7F2.3
TraesCS2A02G214000.1	5.37393	-2.03608	0.00401353	0.464398	Traes_2AS_DCD2F10331.2
TraesCS3B02G072700.1	5.48789	-5.99738	0.00403628	0.46602	Traes_3DS_735801C27.1
MSTRG.76202.4	17.1671	-0.809431	0.00404312	0.46605	Traes_6DS_B73B70A62.9
TraesCS5A02G516000.1	13.7448	-1.0745	0.00405923	0.467464	Traes_5AL_72A7552B9.3
MSTRG.9891.4	14.0157	1.37045	0.00408736	0.469814	Traes_1DL_4C479DE73.7
TraesCS4D02G063300.1	2.57062	-2.93689	0.004097	0.469816	Traes_4DS_CB9C8D689.1
MSTRG.54205.7	4.39119	-2.72451	0.00409827	0.469816	Traes_5DL_70E5AA8DF.1
TraesCS2D02G484500.1	1.57579	-3.08721	0.00410434	0.469816	Traes_2DL_E301FB6B9.2
TraesCS7B02G284400.1	6.4505	-4.34575	0.00410667	0.469816	Traes_7DL_999E12D5D.2
MSTRG.8835.4	22.706	-1.19395	0.00411616	0.47046	Traes_1DS_830C4AC55.2
MSTRG.53835.2	77.2528	-1.30431	0.00412819	0.471034	Traes_5AS_29D806E9D.1
TraesCSU02G053700.1	51.5644	-0.762433	0.00412893	0.471034	Traes_3B_B414345F5.2
MSTRG.72113.1	3.64751	-2.54715	0.00413437	0.471138	Traes_2AL_5F8B0F20C.40
TraesCS6D02G384500.1	31.287	0.599122	0.004171	0.471138	Traes_6DL_5F12F1D71.2
TraesCS2D02G543600.1	4.15261	-1.61503	0.00417623	0.471138	Traes_2DL_DA7FB0A9A.1
MSTRG.65838.1	2.88039	-1.8104	0.00417626	0.471138	Traes_6AS_483CA129D.7
TraesCS6A02G333900.1	72.4652	-1.35384	0.00417773	0.471138	Traes_6DL_5C536D720.1
TraesCS6D02G157600.1	5.01392	1.10444	0.00418154	0.471138	Traes_6AS_C4B235CDE.1
TraesCS6A02G071900.1	8.36654	-0.940307	0.00418175	0.471138	Traes_6AS_077A9B3E1.1
TraesCS6B02G176200.2	11.2058	1.6184	0.00418206	0.471138	Traes_6BS_FEF24AB5C.4
MSTRG.94090.1	27.9594	-1.79731	0.00418222	0.471138	Traes_2AL_4D75CEE491.8
TraesCS1D02G218200.1	8.71029	-1.7249	0.00418402	0.471138	Traes_1AL_E1701918C.1
TraesCS2D02G442300.1	82.4661	0.426235	0.00419217	0.471311	Traes_2BL_5EB8EE6F2.1
TraesCS5B02G492700.1	31.3307	-0.835975	0.00419417	0.471311	Traes_5BL_F296A638F.1
TraesCS3A02G134300.3	4.11638	4.40002	0.00419718	0.471311	Traes_3AS_485AE4DF9.3
TraesCS7B02G453400.1	4.68293	-2.43981	0.00420245	0.471411	Traes_2DL_3D46F95D4.1
MSTRG.10129.4	3.68683	5.38436	0.00420759	0.471411	Traes_1DL_A1F3C6165.8
TraesCS3B02G395700.1	6.68582	-1.5452	0.00420968	0.471411	Traes_3B_11C4E96A0.5
MSTRG.47358.1	5.85576	0.989743	0.00424366	0.474202	Traes_4AL_2EEECCC4B.5
TraesCS6A02G013700.1	21.1854	-3.78756	0.00424563	0.474202	Traes_6DS_E6CCD9F0C.6
MSTRG.84440.2	4.39098	1.59032	0.00424629	0.474202	Traes_7BS_1AEE3223F.3
TraesCS7D02G252900.6	10.9072	6.94962	0.0042549	0.474411	Traes_7DS_904CC3EB5.1
MSTRG.2626.3	5.97224	-1.80165	0.00426067	0.474411	Traes_1BL_6F4AB886C.5
TraesCS1B02G153600.5	2.7531	4.66787	0.00426376	0.474411	Traes_1DL_B3855303E.2
TraesCS2B02G399200.2	38.0369	-0.825602	0.00426968	0.474636	Traes_2BL_0501BC320.4
TraesCS4D02G301600.2	3.23854	-4.55559	0.00428149	0.475081	Traes_4AS_2BC33F6B5.2
TraesCS4B02G031800.1	18.1214	-0.857699	0.00431394	0.478039	Traes_4BS_D84A33C1A.2
MSTRG.17781.2	7.89224	-1.17882	0.00431599	0.478039	Traes_2BS_6AECC4811.3
MSTRG.56332.1	6.4488	-4.89433	0.0043286	0.478998	Traes_5AL_33293FD90.2
TraesCS5D02G211900.3	1.99751	-4.55603	0.00433728	0.479452	Traes_5DL_DD542B202.1
TraesCS2D02G292100.1	8.23829	0.911374	0.00434057	0.479452	Traes_2DL_1A7EDEEE2.1
TraesCS5B02G355800.1	11.1101	-1.65126	0.00435308	0.479709	Traes_5BL_E16E15CFB.2
MSTRG.15295.2	16.6581	3.58834	0.00435321	0.479709	Traes_3B_836F0BC3F.9
MSTRG.15470.2	160.858	0.334966	0.00435472	0.479709	Traes_2AL_9C3A0E71F.2
TraesCS2D02G459900.2	12.5809	2.29056	0.00437337	0.481327	Traes_2DL_7505DB9B3.1
[truncated: 106,764 more rows]

## Sheet: Table-S4_DenovoTransAnnotation
Trans	sampleA	log2FoldChange	pvalue	padj	hitName
[truncated: 126,669 more rows]

[truncated: 2 more sheets: Table-S5_REVIGO_EnrichmentTable, Table-S6_KOBAS_EnrichmentTable]
